# Supplementary material for: Expertly Validated Models and Phylogenetically-Controlled Analysis Suggests Responses to Climate Change Are Related to Species Traits in the Order Lagomorpha
Source: PubMed Central journal article supplement (PMC4398435; doi:10.1371/journal.pone.0122267), 2015-04-15

## S2 Supporting Information.

### Species accounts (#1-89)

#### Key for response curves

| Abbreviation     | Description                                    |
|------------------|------------------------------------------------|
| <b>HII</b>       | Human Influence index                          |
| <b>Hilliness</b> | Surface Roughness index                        |
| <b>MaxPrec</b>   | Maximum precipitation                          |
| <b>MaxTemp</b>   | Maximum temperature                            |
| <b>MinPrec</b>   | Minimum precipitation                          |
| <b>MinTemp</b>   | Minimum temperature                            |
| <b>PrecSea</b>   | Precipitation seasonality                      |
| <b>RealMAR</b>   | Mean annual precipitation                      |
| <b>RealMAT</b>   | Mean annual temperature                        |
| <b>TempSea</b>   | Temperature seasonality                        |
| <b>etpsum</b>    | Annual evapotranspiration                      |
| <b>ndvi</b>      | Normalised difference vegetation index         |
| <b>radiation</b> | Solar radiation                                |
| <b>wbann</b>     | Annual water balance                           |
| <b>wbpos</b>     | Number of months with a positive water balance |

The past and current occurrence records underlying these species accounts can be viewed on <http://lagomorphclimatechange.wordpress.com/>.

**Species account #1 - Pygmy rabbit (*Brachylagus idahoensis*)**

*n* = 39

**Expert:** Penny Becker, Washington Dept. of Fish & Wildlife, USA

**Expert evaluation:** Medium

**Data:** Modern and historic

**Envelope:** Climatic and habitat

**Dispersal distance:** 15km/year (Expert)

**Status:** MODELLABLE; **Included in final analysis:** ✓

| Model evaluation metric |             |
|-------------------------|-------------|
| AUC                     | 0.95        |
| Omission rate           | 0.10        |
| Sensitivity             | 0.90        |
| Specificity             | 1.00        |
| Proportion correct      | 1.00        |
| <b>Kappa</b>            | <b>0.75</b> |
| True Skill Statistic    | 0.90        |

**Summary:** The Pygmy rabbit's bioclimatic envelope is predicted to decline by 87% with a 1° mean latitudinal poleward shift and mean increase in elevation of ~300m driven predominately by an increase in mean minimum elevation (>600m) with little change in mean maximum elevation (~50m). 95% of the permutation importance of the model was contributed to by mean annual temperature (64.5%), maximum temperature (25.2%) and annual water balance (5.9%).

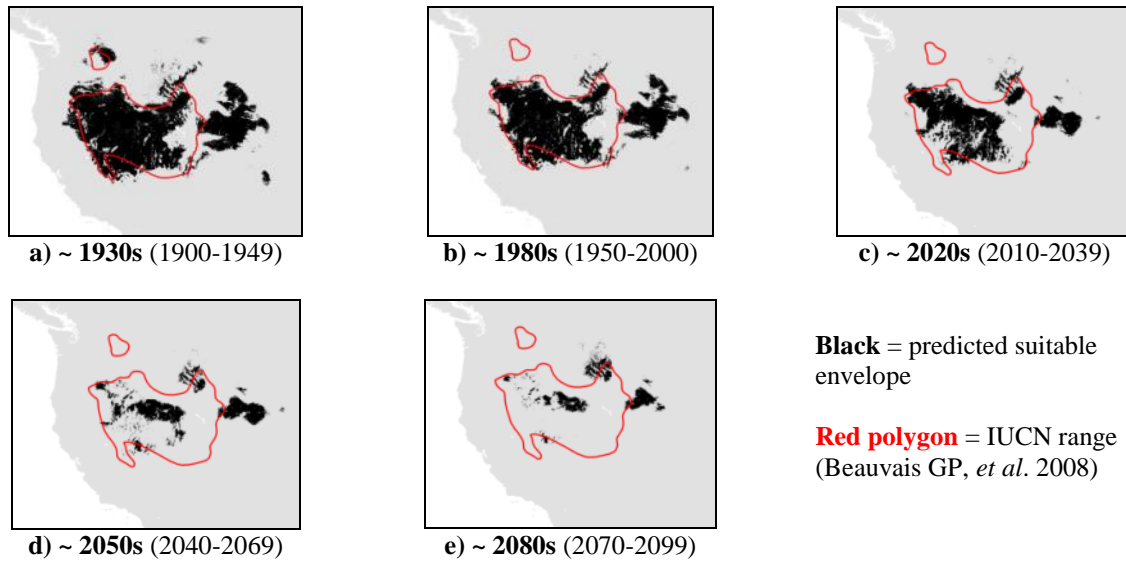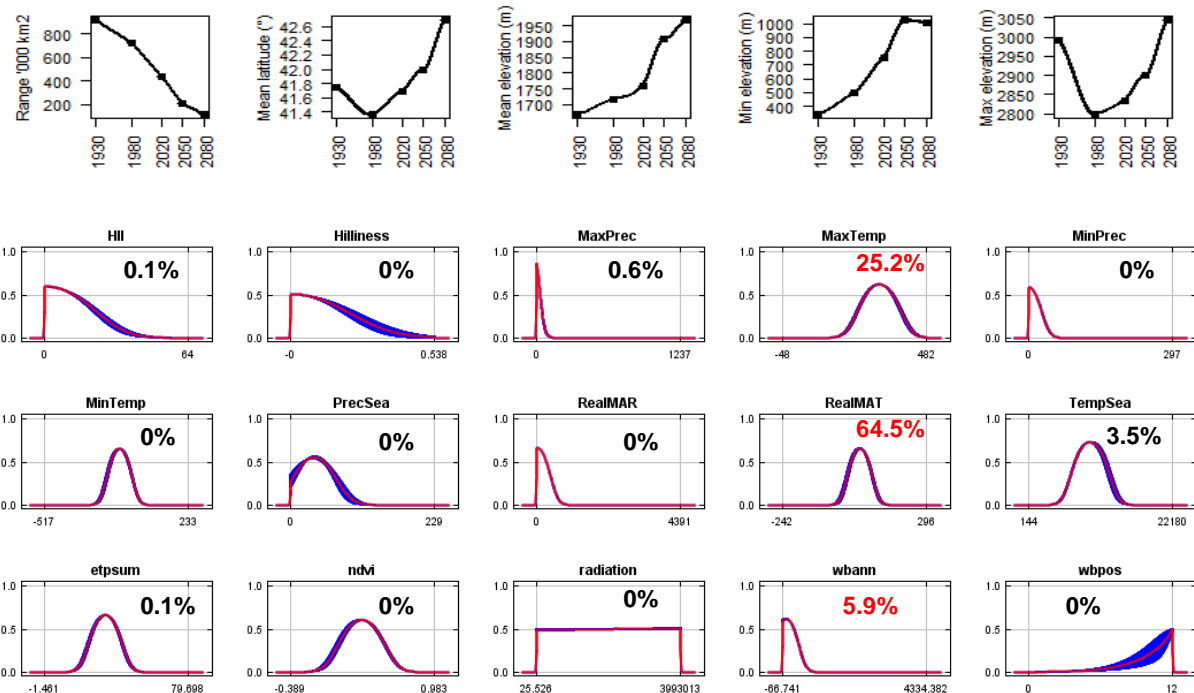

## #2 - Riverine rabbit (*Bunolagus monticularis*)

*n* = 109

**Status:** Kai Collins, University of Pretoria, South Africa

**Expert evaluation:** Good

**Data:** Modern and historic

**Envelope:** Climatic and habitat

**Dispersal distance:** 7.5km/year (Expert)

**Status:** MODELLABLE; **Included in final analysis:** ✓

| <b>Model evaluation metric</b> |             |
|--------------------------------|-------------|
| AUC                            | 0.98        |
| Omission rate                  | 0.03        |
| Sensitivity                    | 0.97        |
| Specificity                    | 1.00        |
| Proportion correct             | 1.00        |
| <b>Kappa</b>                   | <b>0.85</b> |
| True Skill Statistic           | 0.97        |

**Summary:** The Riverine rabbit's bioclimatic envelope is predicted to decline by 85% with a  $\sim 1^\circ$  mean latitudinal poleward shift and mean increase in elevation of  $\sim 200$ m driven by similar increases in both minimum and maximum elevation. 95% of the permutation importance of the model was contributed to by minimum temperature (33.1%) and precipitation (22.5%), temperature seasonality (22.3%), mean annual temperature (6.7%) and precipitation (5.0%), annual evapotranspiration (4.3%) and precipitation seasonality (2.6%).

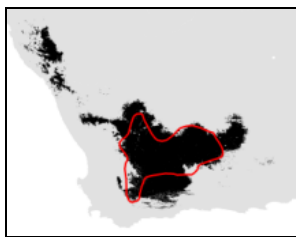

a) ~ 1930s (1900-1949)

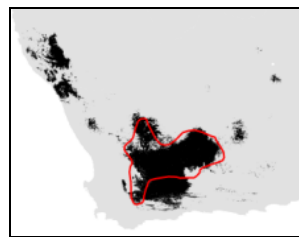

b) ~ 1980s (1950-2000)

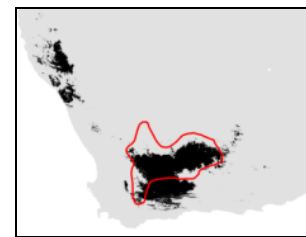

c) ~ 2020s (2010-2039)

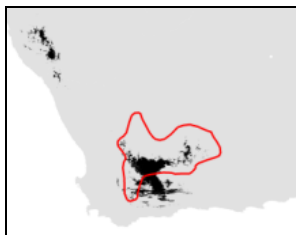

d) ~ 2050s (2040-2069)

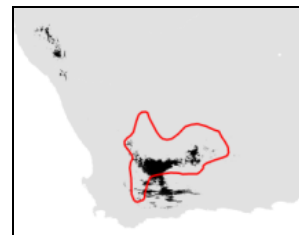

e) ~ 2080s (2070-2099)

**Black** = predicted suitable envelope

**Red polygon** = IUCN range (Beauvais GP, *et al.* 2008)

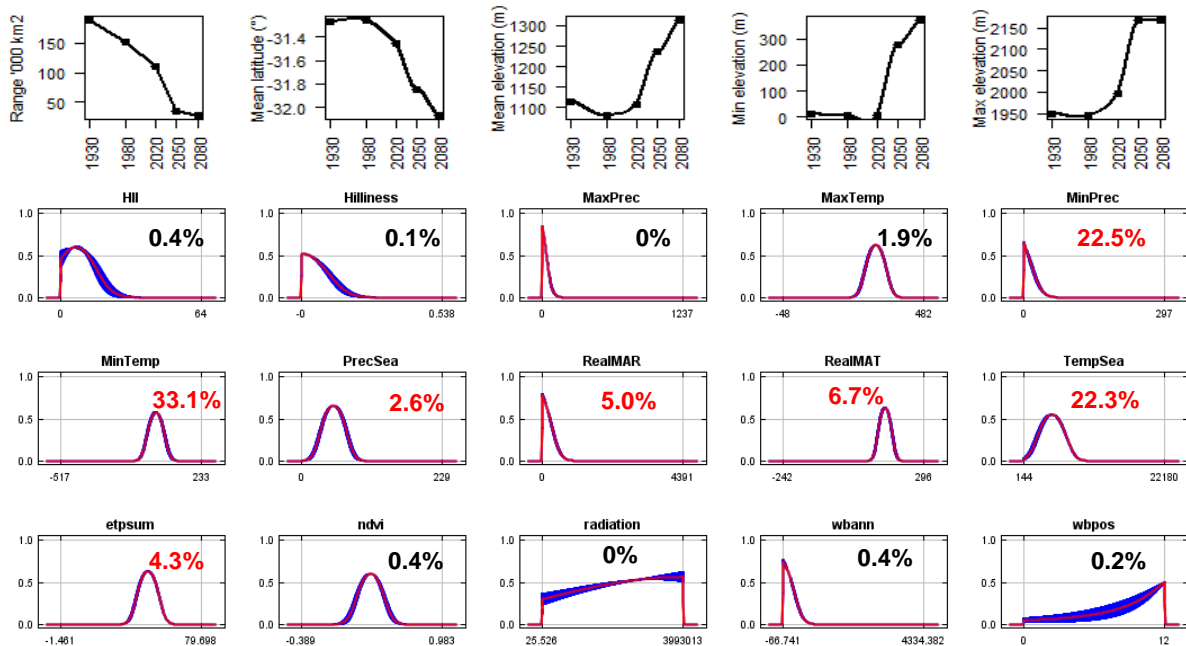

### #3 - Hispid hare (*Caprolagus hispidus*)

$n = 18$

**Expert:** Gopinathan Maheswaran, Zoological Survey of India

**Expert evaluation:** Medium

**Data:** Modern and historic

**Envelope:** Climatic and habitat

**Dispersal distance:** 5km/year (Expert)

**Status:** MODELLABLE; **Included in final analysis:** ✓

| Model evaluation metric |             |
|-------------------------|-------------|
| AUC                     | 0.97        |
| Omission rate           | 0.06        |
| Sensitivity             | 0.94        |
| Specificity             | 0.99        |
| Proportion correct      | 0.99        |
| <b>Kappa</b>            | <b>0.81</b> |
| True Skill Statistic    | 0.94        |

**Summary:** The Hispid hare's bioclimatic envelope is predicted to increase by 21% with a  $\sim 1.5^\circ$  mean latitudinal poleward shift and mean increase in elevation of  $\sim 70\text{m}$  driven by increases in maximum elevation. 95% of the permutation importance of the model was contributed to by mean annual temperature (52.7%), precipitation seasonality (29.0%), annual evapotranspiration (6.6%), number of months with a positive water balance (2.9%), maximum precipitation (2.2%) and minimum temperature (1.7%).

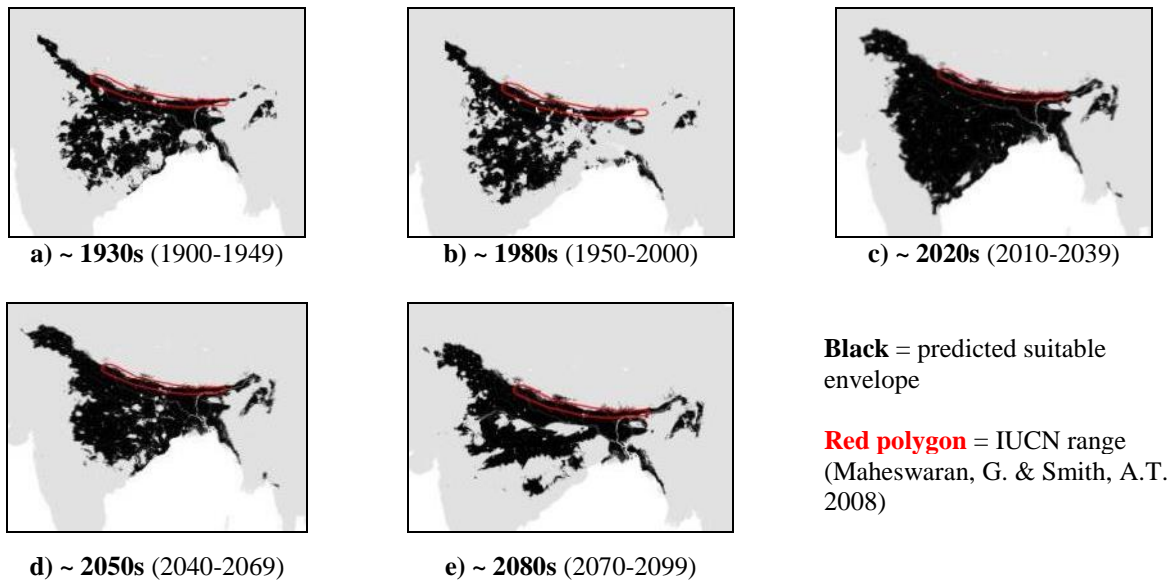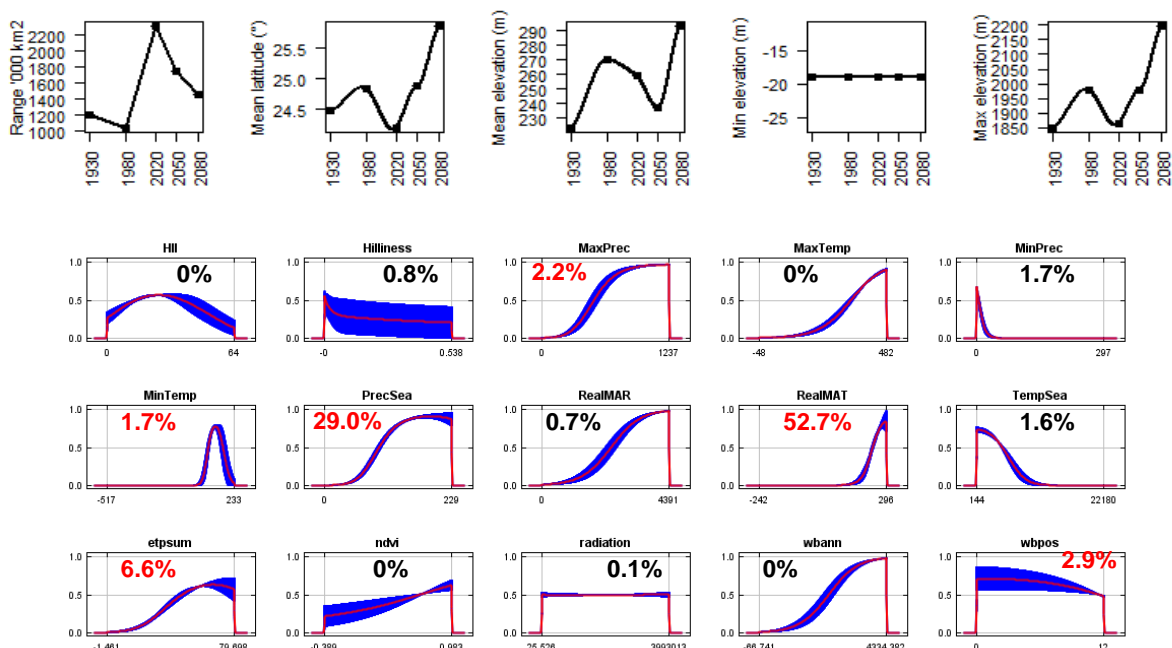



#### #4 – Antelope jackrabbit (*Lepus alleni*)

$n = 32$

**Expert:** Paul Krausman, University of Montana

**Expert evaluation:** Medium

**Data:** Modern and historic

**Envelope:** Climatic and habitat

**Dispersal distance:** 25km/year (Expert)

**Status:** UNMODELLABLE; **Included in final analysis:** X

| Model evaluation metric |             |
|-------------------------|-------------|
| AUC                     | 0.91        |
| Omission rate           | 0.16        |
| Sensitivity             | 0.84        |
| Specificity             | 0.99        |
| Proportion correct      | 0.98        |
| <b>Kappa</b>            | <b>0.26</b> |
| True Skill Statistic    | 0.83        |

**Summary:** The Antelope jackrabbit's bioclimatic envelope is predicted to increase by 172% with a  $\sim 3^\circ$  mean latitudinal poleward shift and mean increase in elevation of  $\sim 20\text{m}$  driven by increases in maximum elevation. 95% of the permutation importance of the model was contributed to by precipitation seasonality (24.8%), minimum precipitation (21.1%), annual water balance (16.3%), minimum temperature (13.0%), temperature seasonality (7.3%), normalised difference vegetation index (5.8%), annual evapotranspiration (5.2%) and human influence index (3.7%).

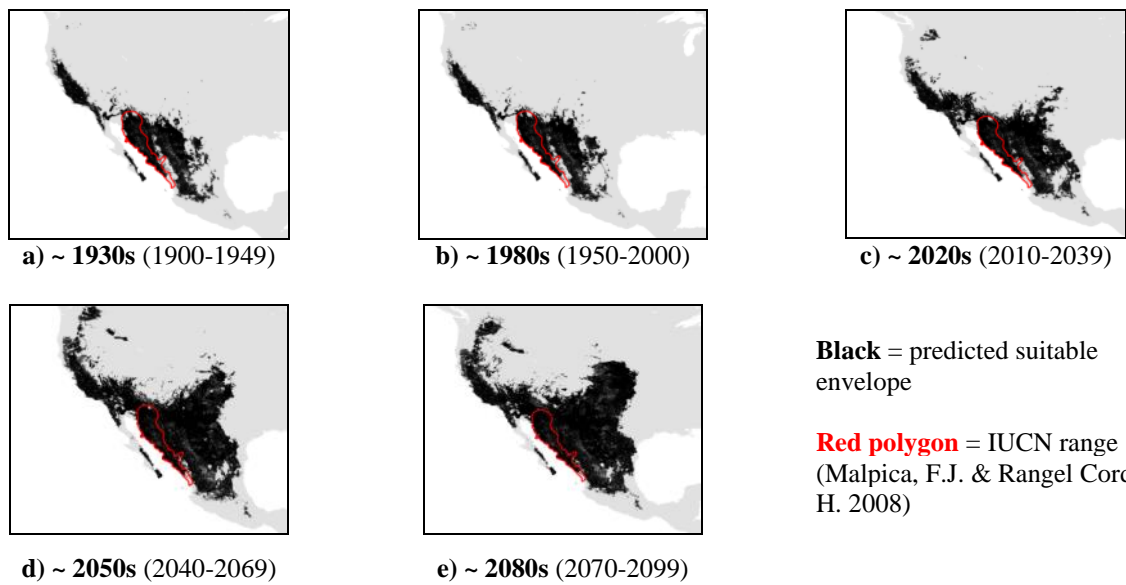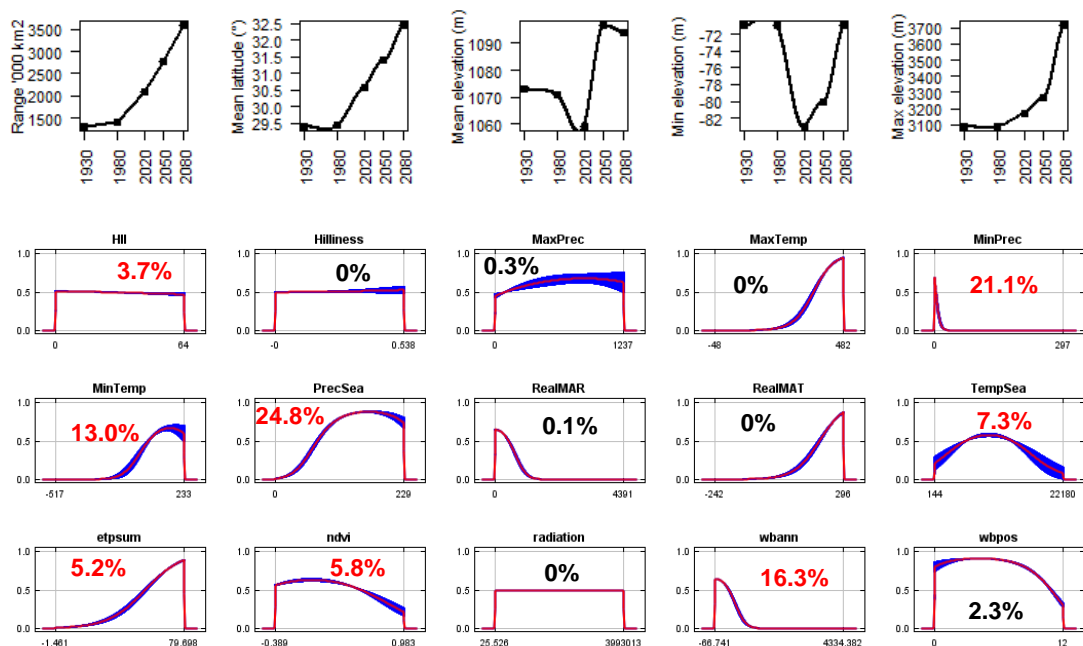

**#5 – Snowshoe hare (*Lepus americanus*)**

*n* = 506

**Expert:** Charles Krebs, University of British Columbia & Rudy Boonstra, University of Toronto Scarborough

**Expert evaluation:** Good

**Data:** Only modern

**Envelope:** Climatic and habitat

**Dispersal distance:** 24km/year (Expert)

**Status:** MODELLABLE; **Included in final analysis:** √

| Model evaluation metric |             |
|-------------------------|-------------|
| AUC                     | 0.95        |
| Omission rate           | 0.07        |
| Sensitivity             | 0.93        |
| Specificity             | 0.97        |
| Proportion correct      | 0.97        |
| <b>Kappa</b>            | <b>0.72</b> |
| True Skill Statistic    | 0.90        |

**Summary:** The Snowshoe hare’s bioclimatic envelope is predicted to decline by 7% with a ~2° mean latitudinal poleward shift and mean decrease in elevation of ~10m, but with increases in both minimum and maximum elevation. 95% of the permutation importance of the model was contributed to by mean annual temperature (83.1%), maximum temperature (7.2%), normalised difference vegetation index (2.1%), mean annual precipitation (1.5%) and annual evapotranspiration (1.2%).

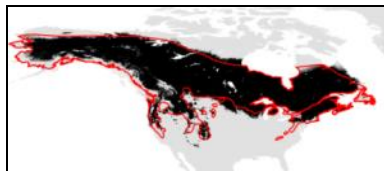

a) ~ 1930s (1900-1949)

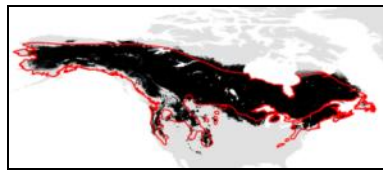

b) ~ 1980s (1950-2000)

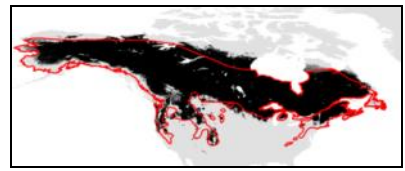

c) ~ 2020s (2010-2039)

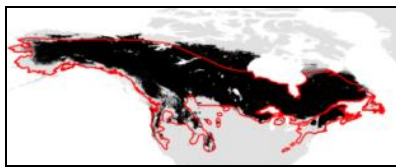

d) ~ 2050s (2040-2069)

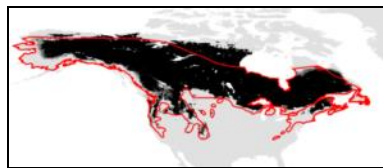

e) ~ 2080s (2070-2099)

**Black** = predicted suitable envelope

**Red polygon** = IUCN range (Murray, D. & Smith, A.T. 2008)

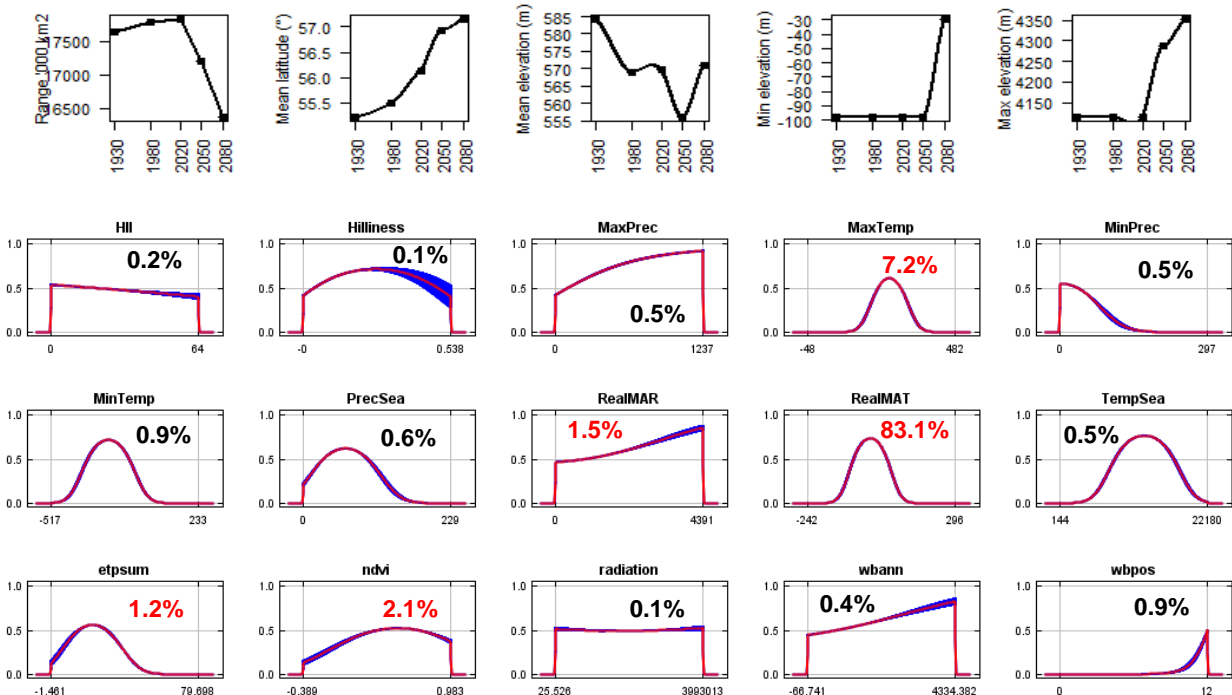

## #6 – Arctic hare (*Lepus arcticus*)

$n = 18$

**Expert:** David Gray, Grayhound Information Services

**Expert evaluation:** Poor

**Data:** Modern and historic

**Envelope:** Climatic and habitat

**Dispersal distance:** 2km/year (Chapman & Flux, 1990)

**Status:** UNMODELLABLE; **Included in final analysis:** X

| Model evaluation metric |             |
|-------------------------|-------------|
| AUC                     | 0.97        |
| Omission rate           | 0.06        |
| Sensitivity             | 0.94        |
| Specificity             | 0.99        |
| Proportion correct      | 0.99        |
| <b>Kappa</b>            | <b>0.36</b> |
| True Skill Statistic    | 0.94        |

**Summary:** The Arctic hare's bioclimatic envelope is predicted to decline by 30% with a  $\sim 2^\circ$  mean latitudinal poleward shift and mean decrease in elevation of  $\sim 10\text{m}$  driven by decreases in maximum temperature (34.0%), annual evapotranspiration (15.4%), surface roughness index (14.4%), human influence index (10.1%), normalised difference vegetation index (9.2%), mean annual temperature (4.4%), precipitation seasonality (1.5%), mean annual precipitation (1.5%), maximum precipitation (0.3%), minimum precipitation (0.3%), solar radiation (0.3%), minimum temperature (0.1%) and number of months with a positive water balance (0.1%).

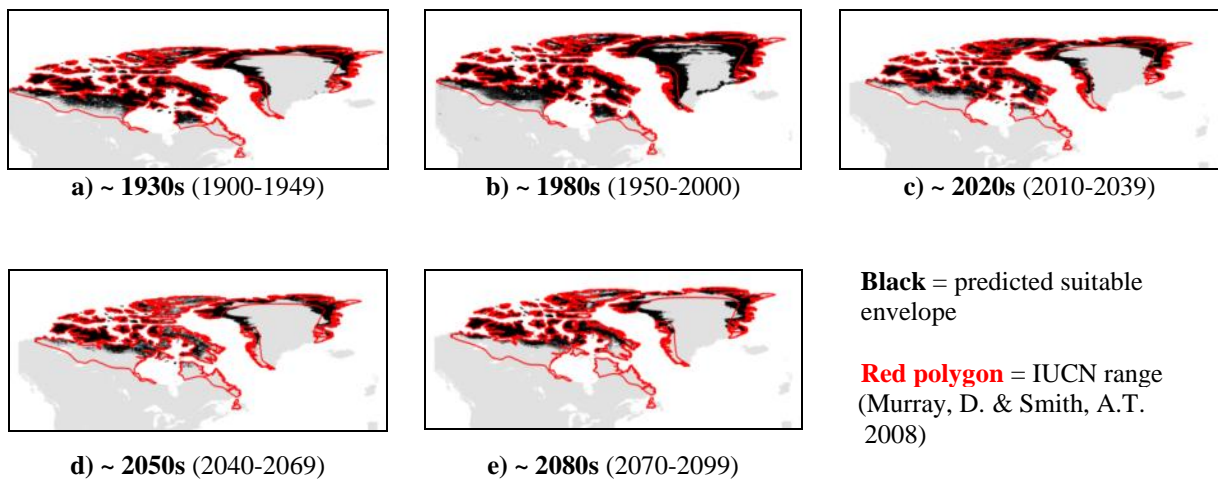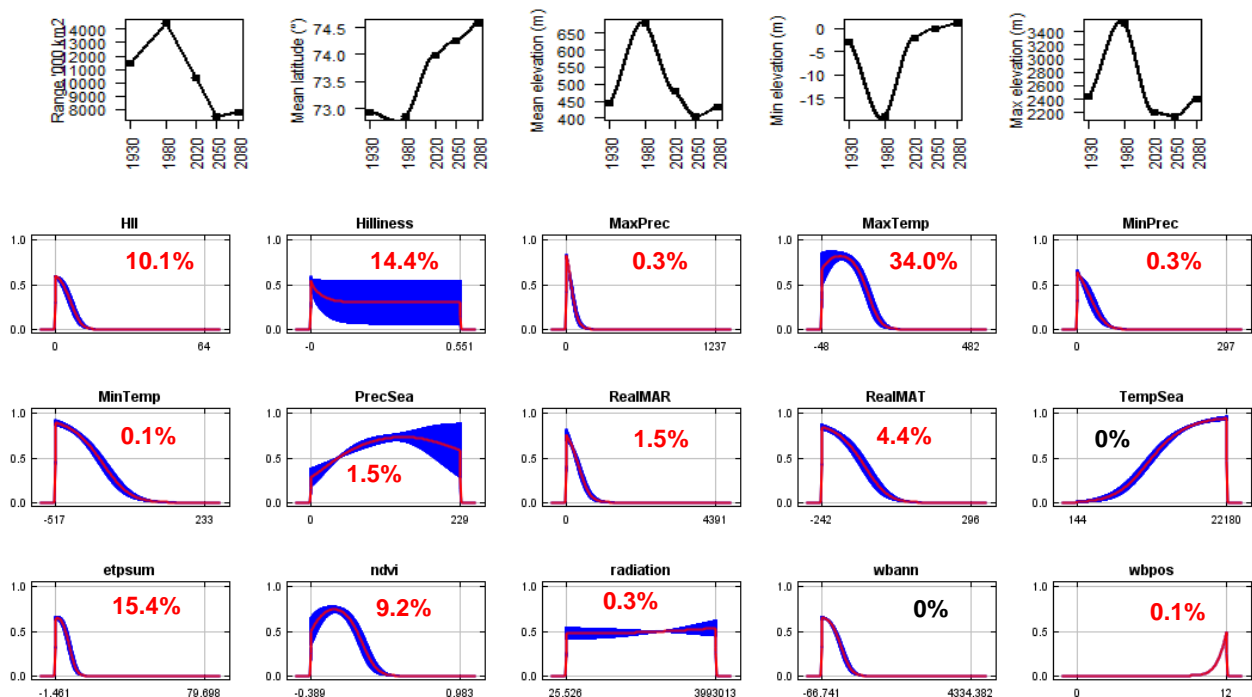

## #7 – Japanese hare (*Lepus brachyurus*)

$n = 9$

**Expert:** Koji Shimano, Shinshu University, Japan

**Expert evaluation:** Medium

**Data:** Modern and historic

**Envelope:** Climatic and habitat

**Dispersal distance:** 1km/year (Expert)

**Status:** MODELLABLE; **Included in final analysis:**  $\checkmark$

| Model evaluation metric |             |
|-------------------------|-------------|
| AUC                     | 0.99        |
| Omission rate           | 0.00        |
| Sensitivity             | 1.00        |
| Specificity             | 0.99        |
| Proportion correct      | 0.99        |
| <b>Kappa</b>            | <b>0.43</b> |
| True Skill Statistic    | 0.99        |

**Summary:** The Japanese hare's bioclimatic envelope is predicted to increase by 9% with no latitudinal poleward shift and a mean increase in elevation of ~10m driven by a decrease in minimum elevation. 95% of the permutation importance of the model was contributed to by temperature seasonality (31.8%), annual water balance (20.6%), human influence index (13.5%), mean annual precipitation (8.9%), maximum precipitation (6.2%), precipitation seasonality (5.4%) and minimum precipitation (4.4%).

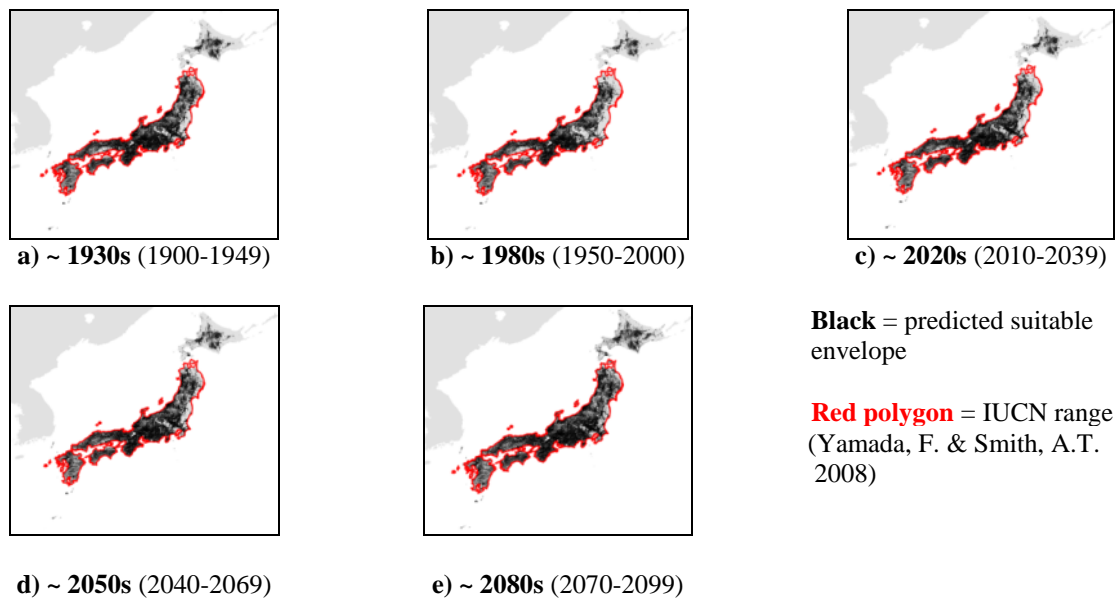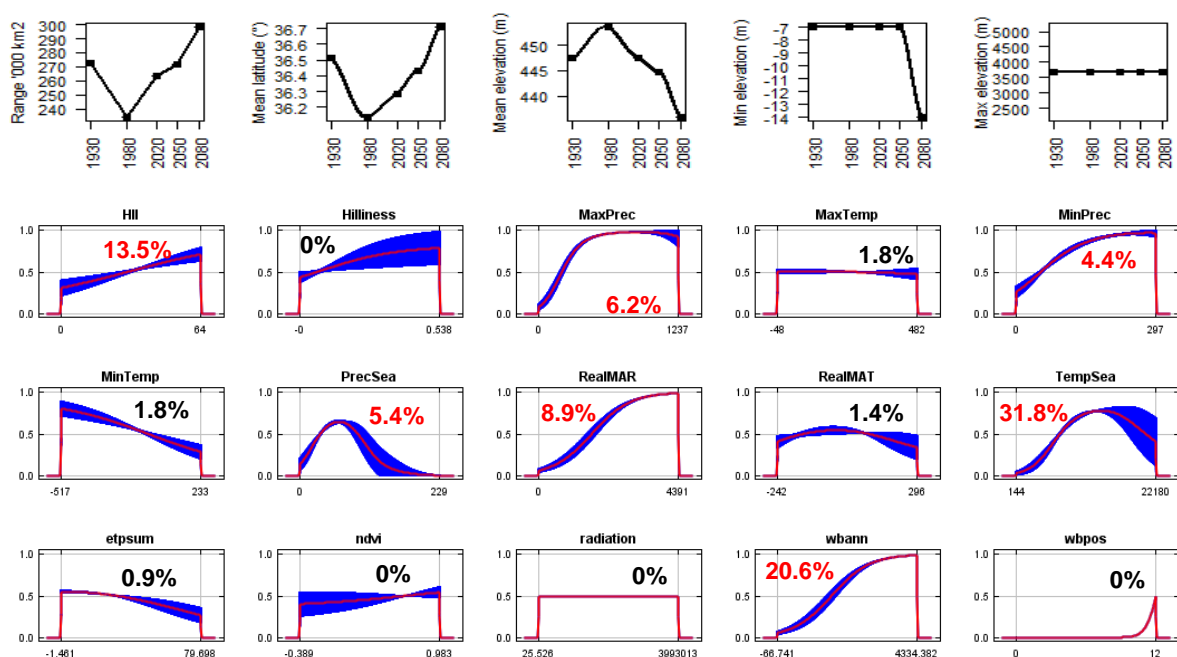

## #8 – Black-tailed jackrabbit (*Lepus californicus*)

$n = 970$

**Expert:** Alejandro Velasquez, UNAM-Canada

**Expert evaluation:** Medium

**Data:** Modern and historic

**Envelope:** Climatic and habitat

**Dispersal distance:** 18.9km/year (N.Am. leporids, range 2-25)

**Status:** MODELLABLE; **Included in final analysis:**  $\checkmark$

| Model evaluation metric |             |
|-------------------------|-------------|
| AUC                     | 0.93        |
| Omission rate           | 0.07        |
| Sensitivity             | 0.93        |
| Specificity             | 0.94        |
| Proportion correct      | 0.94        |
| <b>Kappa</b>            | <b>0.69</b> |
| True Skill Statistic    | 0.87        |

**Summary:** The Black-tailed jackrabbit's bioclimatic envelope is predicted to decline by 25% with a  $\sim 2^\circ$  mean latitudinal poleward shift and mean decrease in elevation of  $\sim 75$ m, but with increases in both minimum and maximum elevation. 95% of the permutation importance of the model was contributed to by precipitation seasonality (31.8%), annual evapotranspiration (18.5%), maximum temperature (17.0%), mean annual temperature (8.9%), minimum temperature (8.0%), minimum precipitation (4.0%), human influence index (3.9%) and temperature seasonality (3.5%).

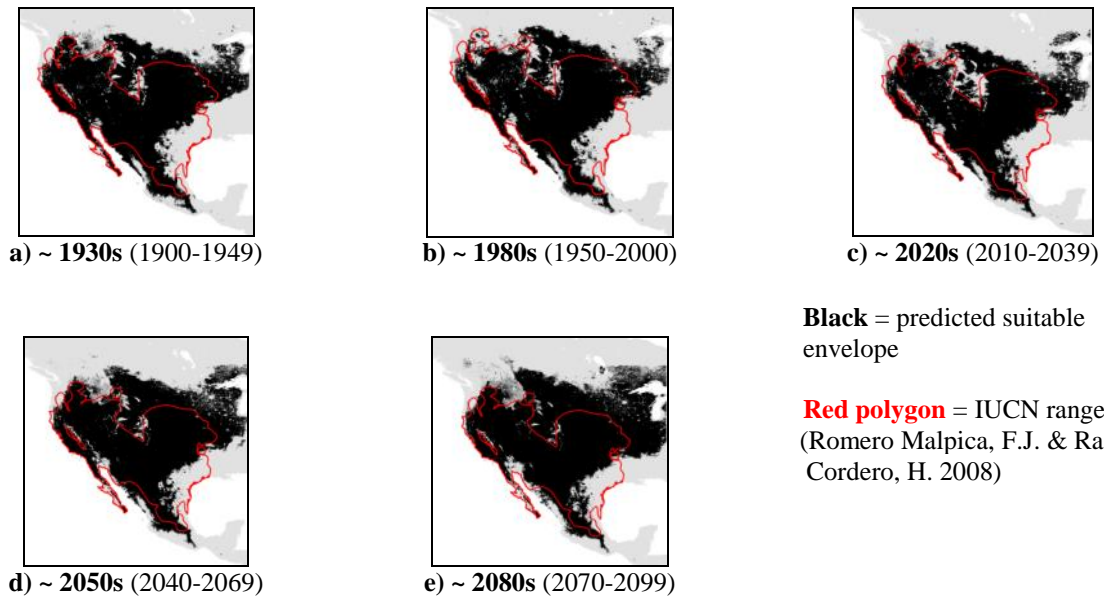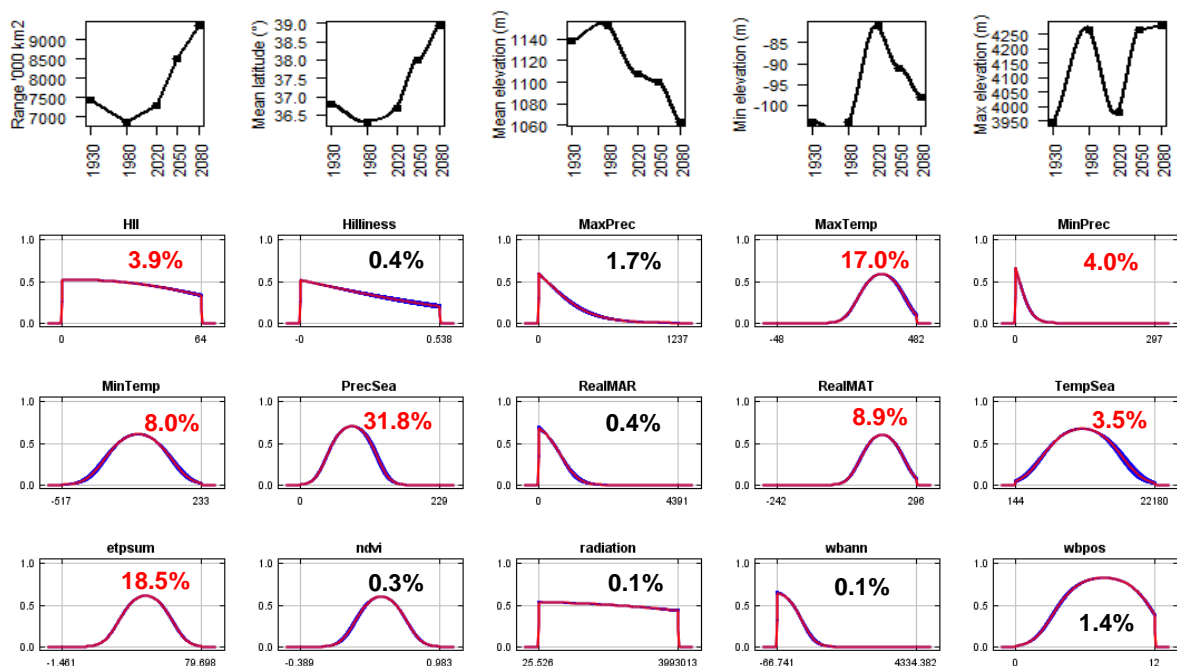



**#9 – White-sided jackrabbit (*Lepus callotis*)**

*n* = 37

**Expert:** Jennifer Frey, New Mexico State University

**Expert evaluation:** Medium

**Data:** Modern and historic

**Envelope:** Climatic and habitat

**Dispersal distance:** 18.9km/year (N.Am. leporids, range 2-25)

**Status:** UNMODELLABLE; **Included in final analysis:** X

| Model evaluation metric |             |
|-------------------------|-------------|
| AUC                     | 0.97        |
| Omission rate           | 0.05        |
| Sensitivity             | 0.95        |
| Specificity             | 0.99        |
| Proportion correct      | 0.99        |
| <b>Kappa</b>            | <b>0.36</b> |
| True Skill Statistic    | 0.93        |

**Summary:** The White-sided jackrabbit’s bioclimatic envelope is predicted to increase by 3% with a ~1° mean latitudinal poleward shift and a mean increase in elevation of ~150m driven by an increase in maximum elevation. 95% of the permutation importance of the model was contributed to by precipitation seasonality (35.4%), annual evapotranspiration (22.3%), minimum temperature (17.0%), mean annual temperature (10.5%), minimum precipitation (6.5%), maximum precipitation (6.5%), surface roughness index (3.0%) and number of months with a positive water balance (2.7%).

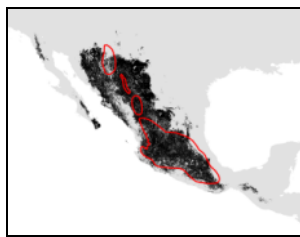

a) ~ 1930s (1900-1949)

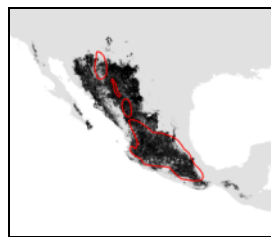

b) ~ 1980s (1950-2000)

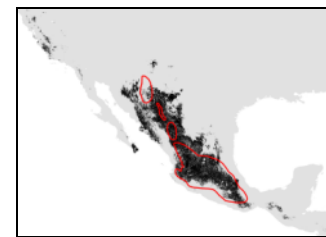

c) ~ 2020s (2010-2039)

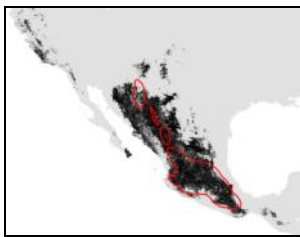

d) ~ 2050s (2040-2069)

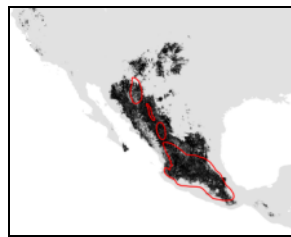

e) ~ 2080s (2070-2099)

**Black** = predicted suitable envelope

**Red polygon** = IUCN range (Romero Malpica, F.J. & Rangel Cordero, H. 2008)

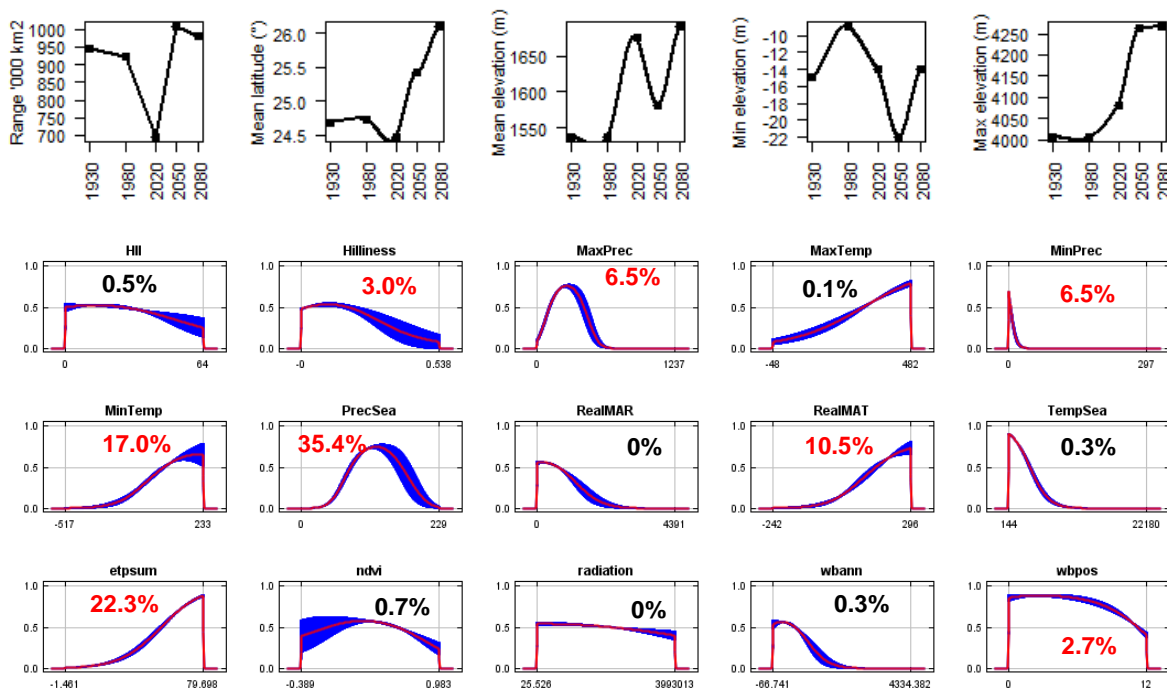

## #10 – Cape hare (*Lepus capensis*)

$n = 231$

**Expert:** John Flux, IUCN Lagomorph Specialist Group

**Expert evaluation:** Poor

**Data:** Modern and historic

**Envelope:** Climatic and habitat

**Dispersal distance:** 35km/year (Expert)

**Status:** UNMODELLABLE; **Included in final analysis:** X

| Model evaluation metric |             |
|-------------------------|-------------|
| AUC                     | 0.93        |
| Omission rate           | 0.10        |
| Sensitivity             | 0.90        |
| Specificity             | 0.97        |
| Proportion correct      | 0.97        |
| <b>Kappa</b>            | <b>0.56</b> |
| True Skill Statistic    | 0.87        |

**Summary:** The Cape hare's bioclimatic envelope is predicted to decrease by 45% with  $\sim 2^\circ$  mean latitudinal shift towards the Equator and a mean increase in elevation of  $\sim 330\text{m}$  driven by an increase in maximum elevation. 95% of the permutation importance of the model was contributed to by annual evapotranspiration (33.1%), minimum precipitation (29.6%), maximum temperature (9.7%), human influence index (7.2%), normalised difference vegetation index (4.6%), minimum temperature (3.2%), number of months with a positive water balance (2.9%), maximum precipitation (2.2%), mean annual precipitation (2.1%) and precipitation seasonality (2.0%).

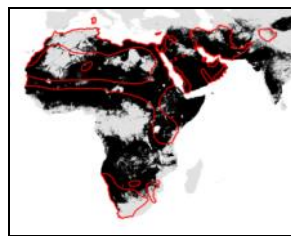

a) ~ 1930s (1900-1949)

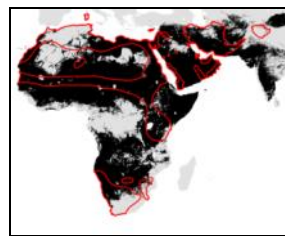

b) ~ 1980s (1950-2000)

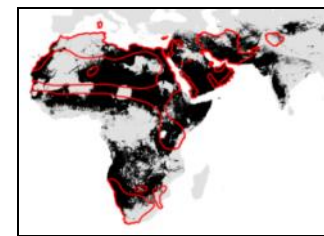

c) ~ 2020s (2010-2039)

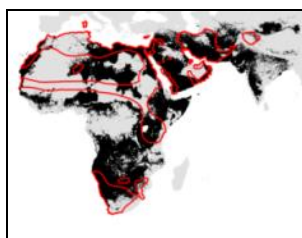

d) ~ 2050s (2040-2069)

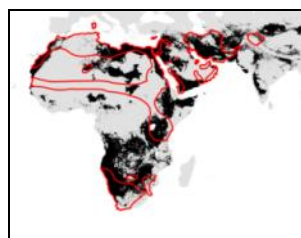

e) ~ 2080s (2070-2099)

**Black** = predicted suitable envelope

**Red polygon** = IUCN range (Drew, C., *et al.* 2008)

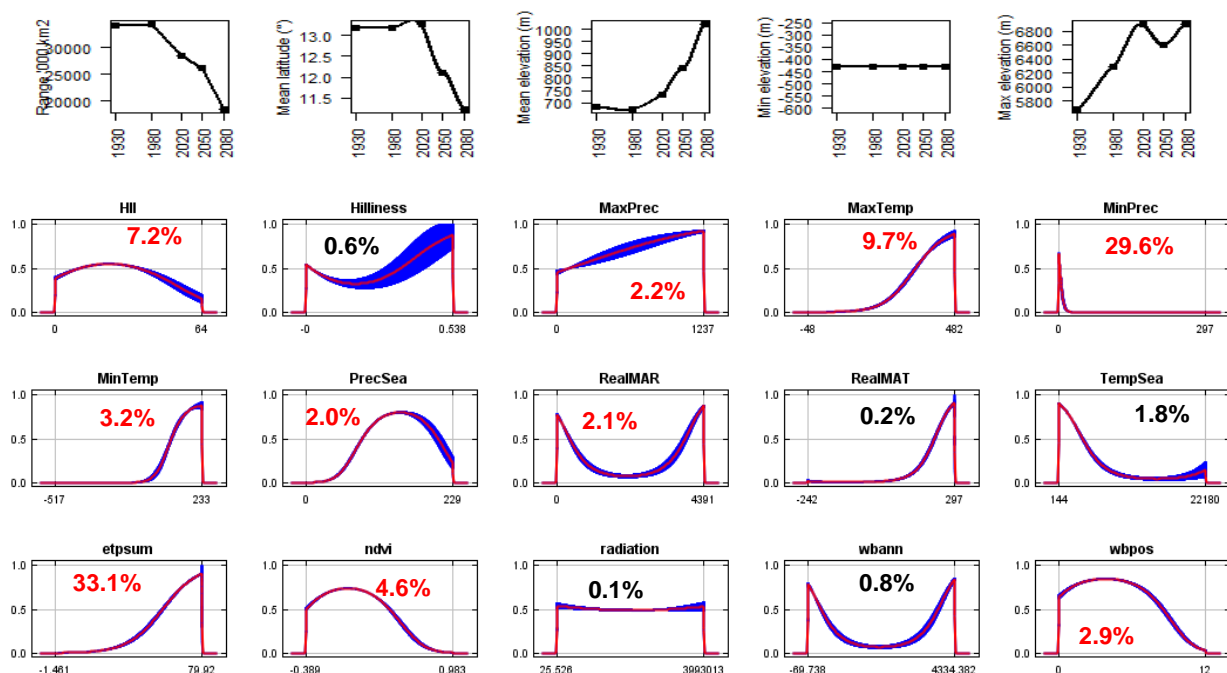



**#11 – Broom hare (*Lepus castroviejoi*)**

*n* = 164

**Expert:** Pelayo Acevedo, University of Porto

**Expert evaluation:** Medium

**Data:** Only modern

**Envelope:** Climatic and habitat

**Dispersal distance:** 1km/year (Expert)

**Status:** MODELLABLE; **Included in final analysis:** √

| Model evaluation metric |             |
|-------------------------|-------------|
| AUC                     | 0.94        |
| Omission rate           | 0.11        |
| Sensitivity             | 0.89        |
| Specificity             | 0.99        |
| Proportion correct      | 0.99        |
| <b>Kappa</b>            | <b>0.80</b> |
| True Skill Statistic    | 0.89        |

**Summary:** The Broom hare’s bioclimatic envelope is predicted to decrease by 90% with a ~0.2° mean latitudinal poleward shift and a mean increase in elevation of ~450m driven by an increase in minimum elevation. 95% of the permutation importance of the model was contributed to by mean annual temperature (62.0%), maximum temperature (20.6%), temperature seasonality (10.9%) and surface roughness index (3.8%).

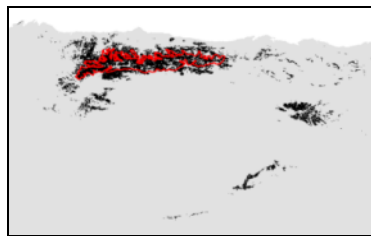

a) ~ 1930s (1900-1949)

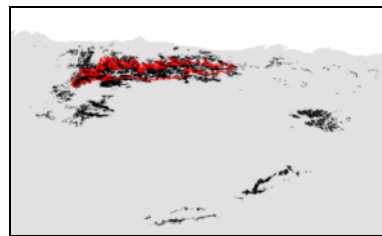

b) ~ 1980s (1950-2000)

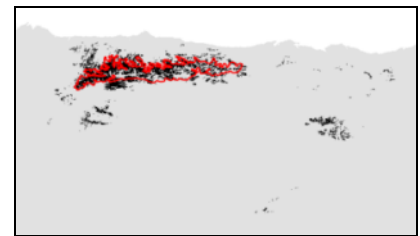

c) ~ 2020s (2010-2039)

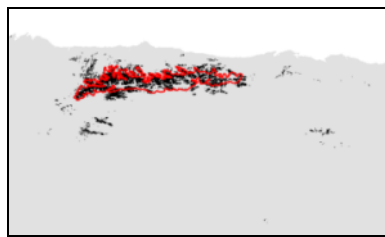

d) ~ 2050s (2040-2069)

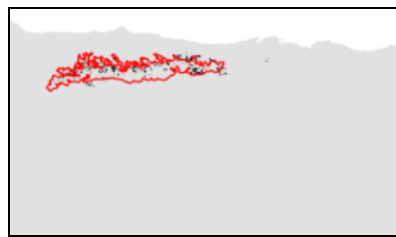

e) ~ 2080s (2070-2099)

**Black** = predicted suitable envelope

**Red polygon** = IUCN range (Smith, A.T. & Johnston, C.H. 2008)

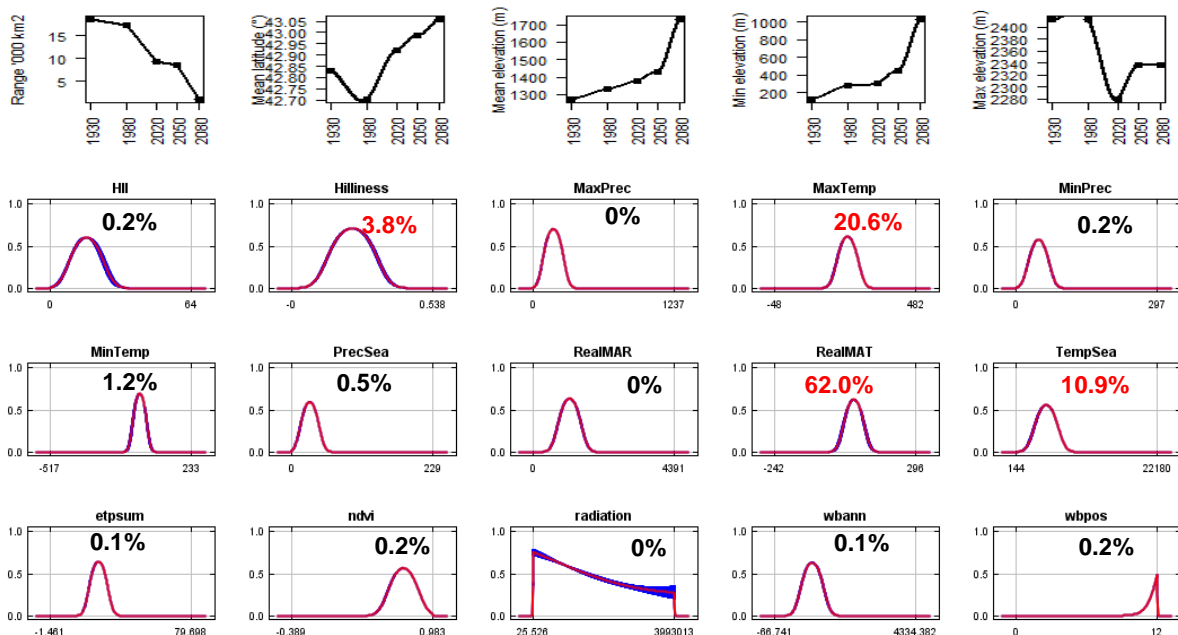

**#12 – Yunnan hare (*Lepus comus*)**

*n* = 59

**Expert:** Weihe Yang, Institute of Zoology, Chinese Academy of Sciences

**Expert evaluation:** Medium

**Data:** Modern and historic

**Envelope:** Climatic and habitat

**Dispersal distance:** 2.5km/year (Asian leporids, range 1-35)

**Status:** MODELLABLE; **Included in final analysis:** ✓

| <b>Model evaluation metric</b> |             |
|--------------------------------|-------------|
| AUC                            | 0.92        |
| Omission rate                  | 0.15        |
| Sensitivity                    | 0.85        |
| Specificity                    | 0.99        |
| Proportion correct             | 0.99        |
| <b>Kappa</b>                   | <b>0.67</b> |
| True Skill Statistic           | 0.84        |

**Summary:** The Yunnan hare’s bioclimatic envelope is predicted to decrease by 65% with a ~0.1° mean latitudinal poleward shift and a mean increase in elevation of ~100m driven by both increases in maximum and minimum elevation. 95% of the permutation importance of the model was contributed to by precipitation seasonality (59.9%), maximum temperature (26.8%), temperature seasonality (2.9%), number of months with a positive water balance (2.6%), annual evapotranspiration (2.0%) and mean annual temperature (1.7%).

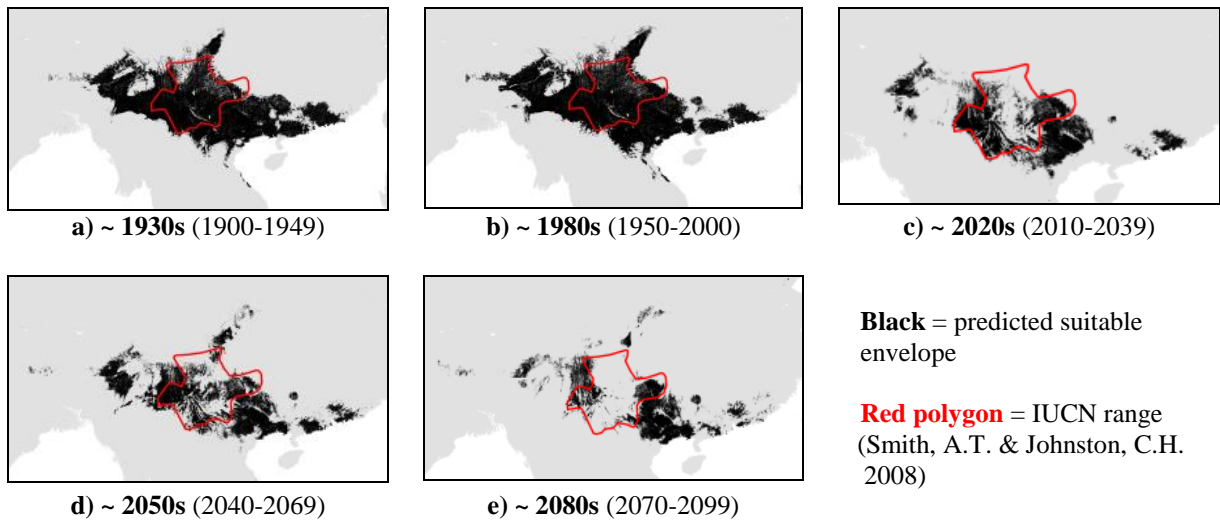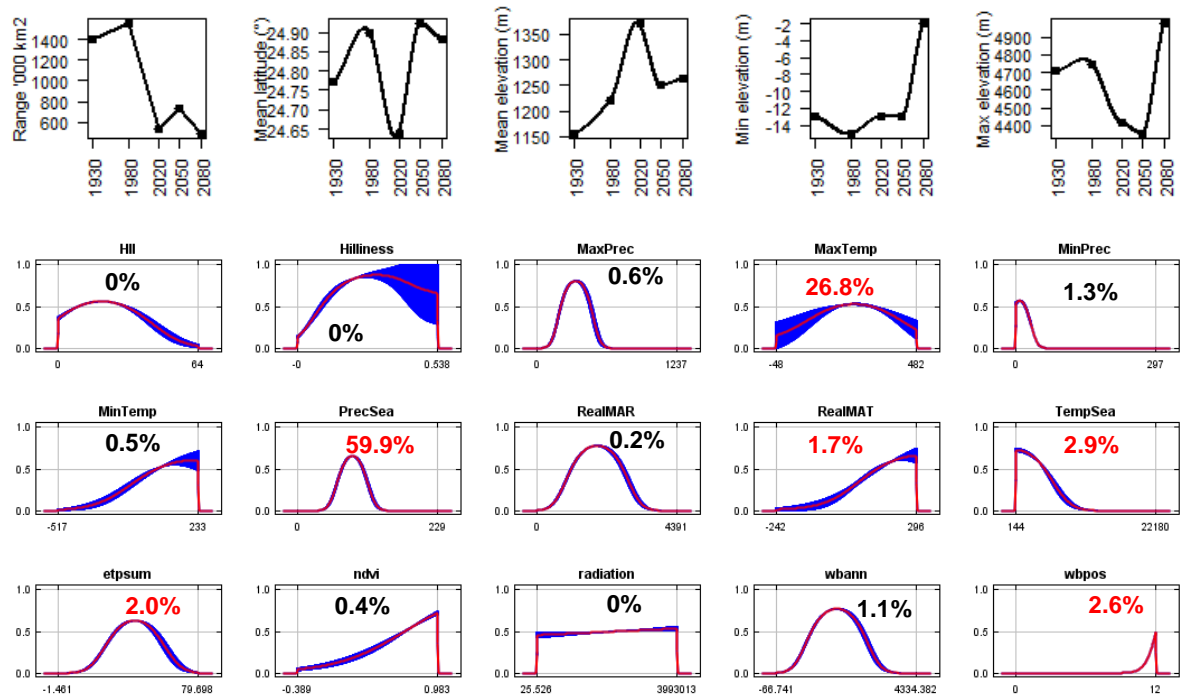

**#13 – Korean hare (*Lepus coreanus*)**

*n* = 6

**Expert:** Weihe Yang, Institute of Zoology, Chinese Academy of Sciences

**Expert evaluation:** Medium

**Data:** Modern and historic

**Envelope:** Climatic and habitat

**Dispersal distance:** 2.5km/year (Asian leporids, range 1-35)

**Status:** MODELLABLE; **Included in final analysis:** ✓

| Model evaluation metric |             |
|-------------------------|-------------|
| AUC                     | 0.99        |
| Omission rate           | 0.00        |
| Sensitivity             | 1.00        |
| Specificity             | 0.99        |
| Proportion correct      | 0.99        |
| <b>Kappa</b>            | <b>0.86</b> |
| True Skill Statistic    | 0.99        |

**Summary:** The Korean hare’s bioclimatic envelope is predicted to increase by 500% with a ~8° mean latitudinal poleward shift and a mean increase in elevation of ~70m driven by an increase in minimum elevation. 95% of the permutation importance of the model was contributed to by temperature seasonality (27.2%), mean annual precipitation (25.6%), minimum temperature (17.7%), annual water balance (13.1%), normalised difference vegetation index (4.7%), precipitation seasonality (4.5%) and human influence index (2.4%).

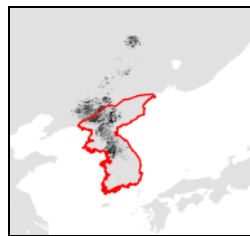

a) ~ 1930s (1900-1949)

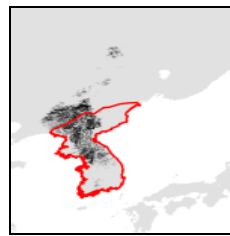

b) ~ 1980s (1950-2000)

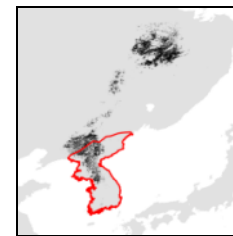

c) ~ 2020s (2010-2039)

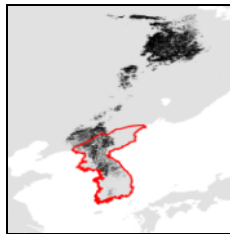

d) ~ 2050s (2040-2069)

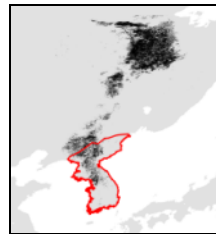

e) ~ 2080s (2070-2099)

**Black** = predicted suitable envelope

**Red polygon** = IUCN range (Smith, A.T. & Johnston, C.H. 2008)

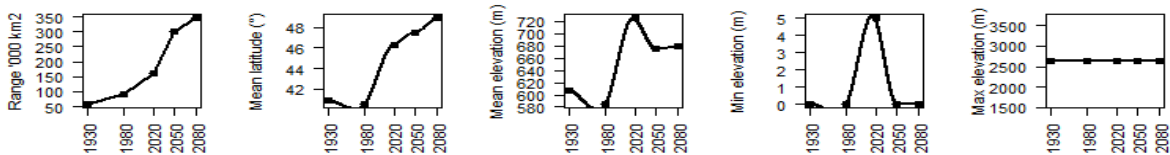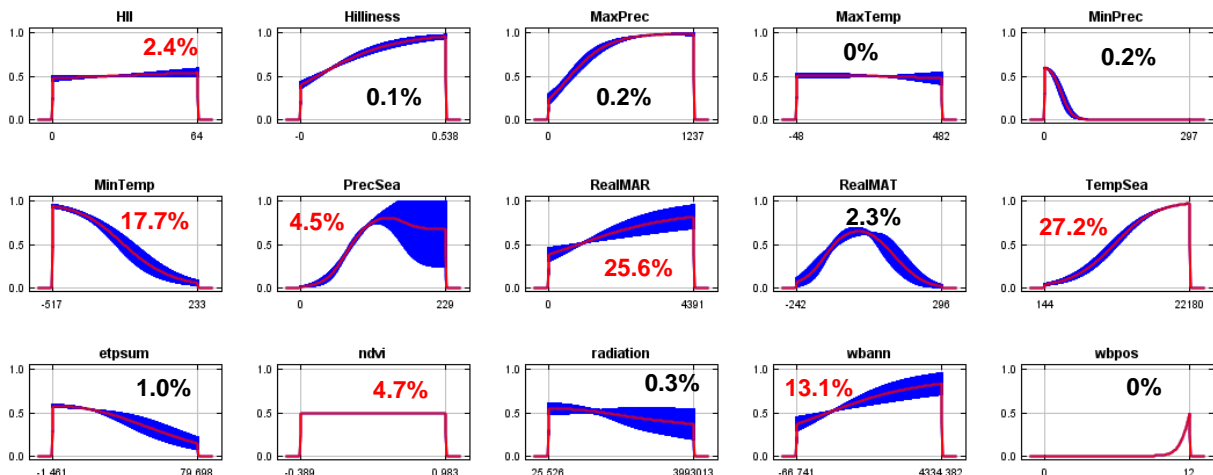

**#14 – Apennine hare (*Lepus corsicanus*)**

*n* = 59

**Expert:** Francesco Angelici, Italian Foundation of Vertebrate Zoology

**Expert evaluation:** Medium

**Data:** Only modern

**Envelope:** Climatic and habitat

**Dispersal distance:** 3km/year (Expert)

**Status:** MODELLABLE; **Included in final analysis:** ✓

| <b>Model evaluation metric</b> |             |
|--------------------------------|-------------|
| AUC                            | 0.99        |
| Omission rate                  | 0.00        |
| Sensitivity                    | 1.00        |
| Specificity                    | 0.99        |
| Proportion correct             | 0.99        |
| <b>Kappa</b>                   | <b>0.53</b> |
| True Skill Statistic           | 0.99        |

**Summary:** The Apennine hare’s bioclimatic envelope is predicted to increase by 125% with a ~2° mean latitudinal poleward shift and a mean decrease in elevation of ~60m. 95% of the permutation importance of the model was contributed to by minimum temperature (37.9%), annual evapotranspiration (34.3%), temperature seasonality (11.4%), minimum precipitation (11.1%) and maximum temperature (2.8%).

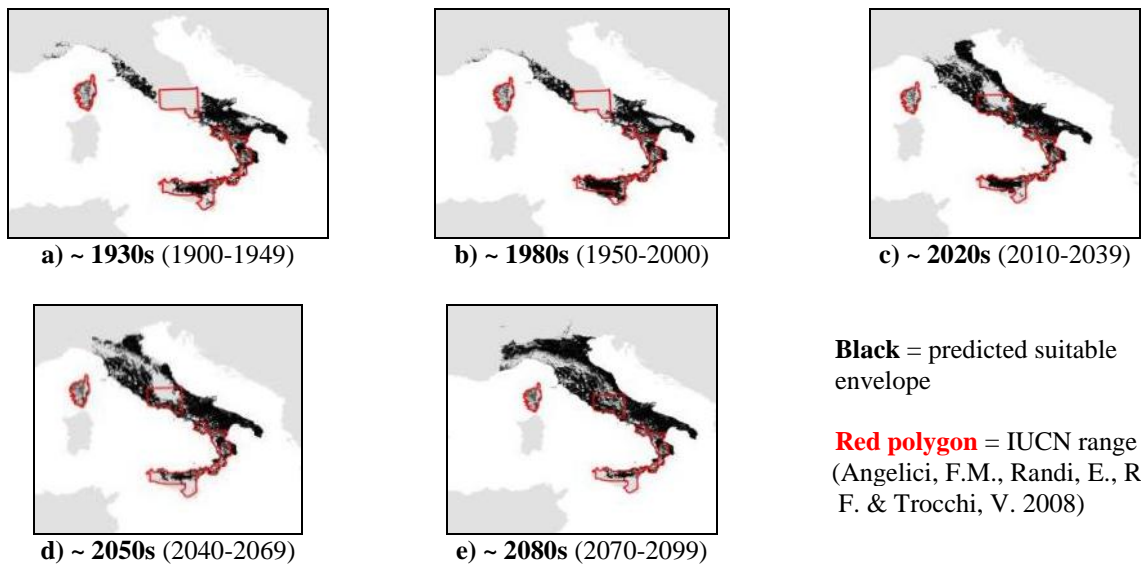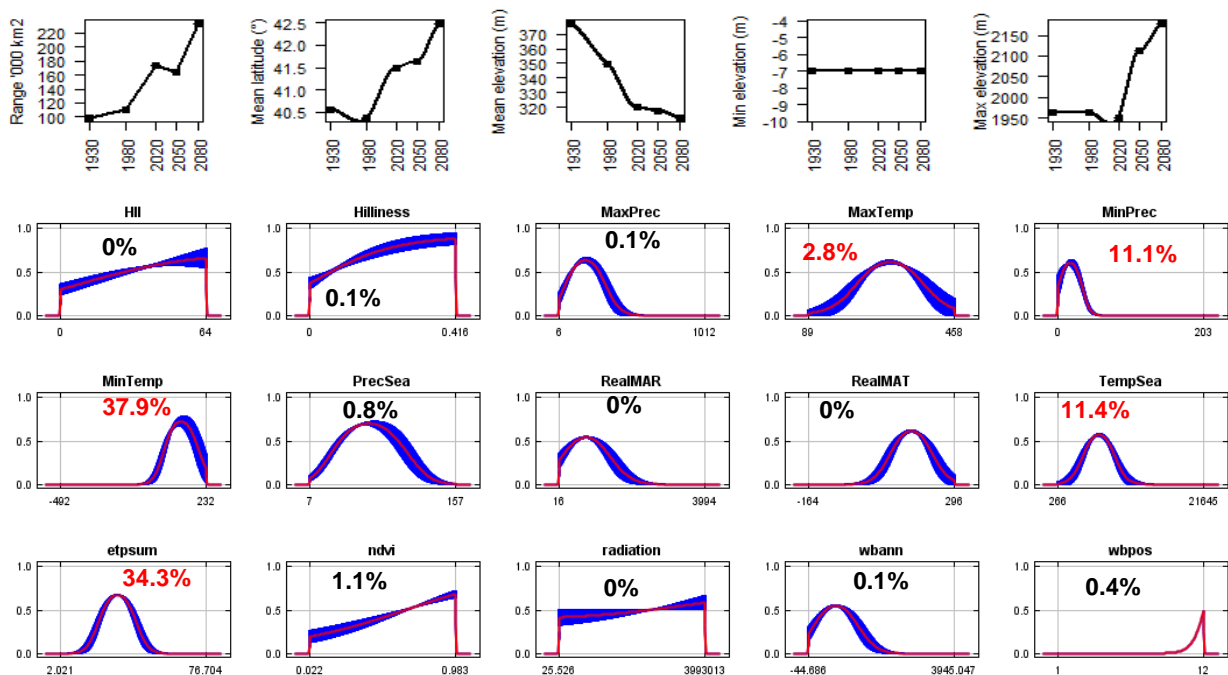

**#15 – European hare (*Lepus europaeus*)-native range only**

*n* = 6,186

**Expert:** Neil Reid, Queen’s University Belfast

Expert evaluation: Medium

**Data:** Only modern

**Envelope:** Climatic and habitat

**Dispersal distance:** 2km/year (Chapman & Flux, 1990)

**Status:** MODELLABLE; **Included in final analysis:** ✓

| Model evaluation metric |             |
|-------------------------|-------------|
| AUC                     | 0.81        |
| Omission rate           | 0.07        |
| Sensitivity             | 0.93        |
| Specificity             | 0.69        |
| Proportion correct      | 0.78        |
| <b>Kappa</b>            | <b>0.57</b> |
| True Skill Statistic    | 0.62        |

**Summary:** The European hare’s bioclimatic envelope is predicted to increase by 50% with a ~3° mean latitudinal poleward shift and a mean increase in elevation of ~20m driven by an increase in both maximum and minimum elevation. 95% of the permutation importance of the model was contributed to by annual evapotranspiration (58.0%), minimum temperature (9.0%), temperature seasonality (7.3%), surface roughness index (5.5%), human influence index (5.1%), precipitation seasonality (3.3%), annual water balance (3.3%), minimum precipitation (3.0%), normalised difference vegetation index (2.4%) and mean annual temperature (1.5%).

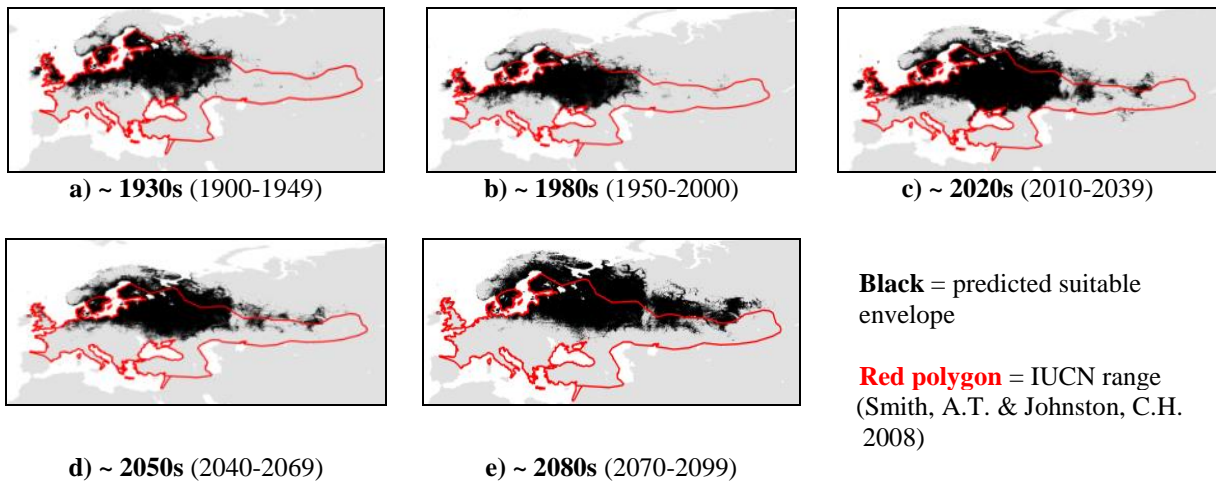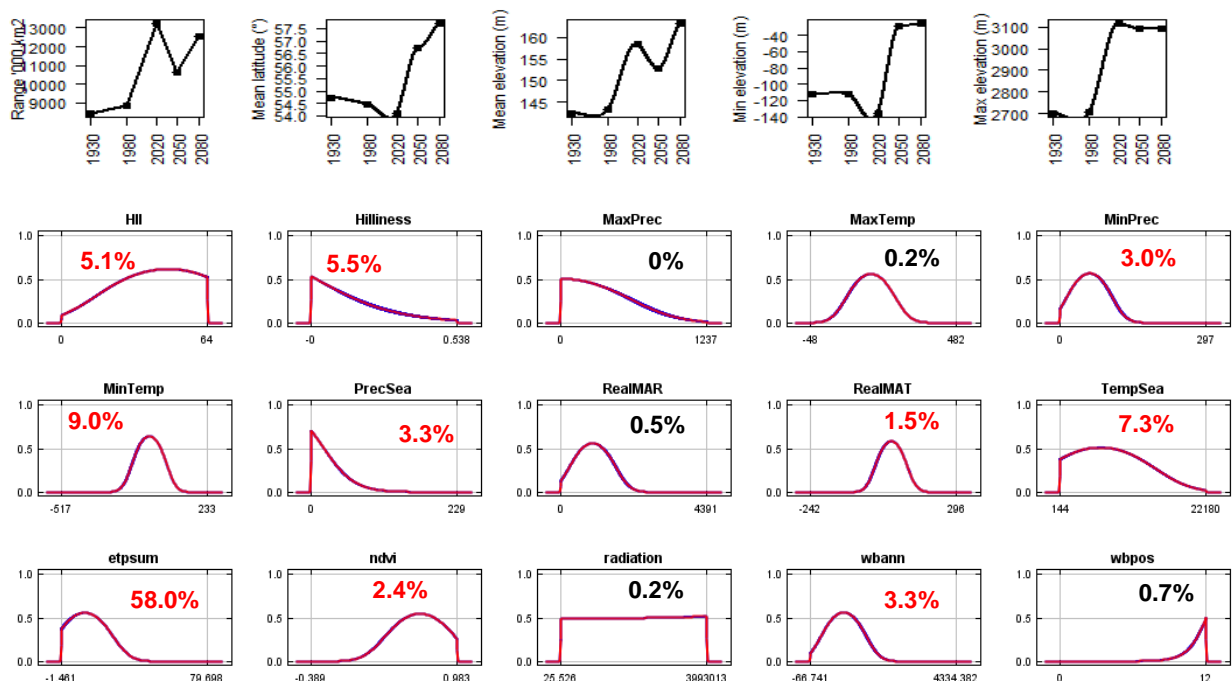



**#16 – Ethiopian hare (*Lepus fagani*)**

*n* = 9

**Expert:** Zelalem Tolesa, Addis Ababa University

**Expert evaluation:** Poor

**Data:** Modern and historic

**Envelope:** Climatic and habitat

**Dispersal distance:** 25km/year (African leporids, range 15-35)

**Status:** UNMODELLABLE; **Included in final analysis:** X

| Model evaluation metric |             |
|-------------------------|-------------|
| AUC                     | 0.99        |
| Omission rate           | 0.00        |
| Sensitivity             | 1.00        |
| Specificity             | 0.99        |
| Proportion correct      | 0.99        |
| <b>Kappa</b>            | <b>0.56</b> |
| True Skill Statistic    | 0.99        |

**Summary:** The Ethiopian hare’s bioclimatic envelope is predicted to decrease by 15% with no latitudinal poleward shift and a mean increase in elevation of ~200m driven by an increase in maximum and minimum elevation. 95% of the permutation importance of the model was contributed to by temperature seasonality (92.7%) and annual evapotranspiration (5.3%).

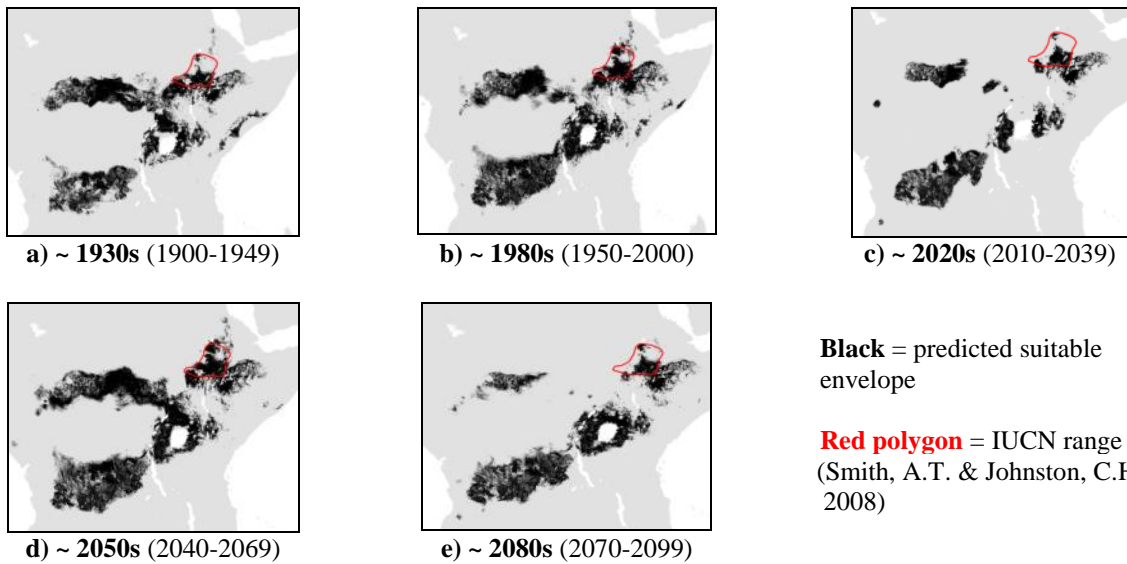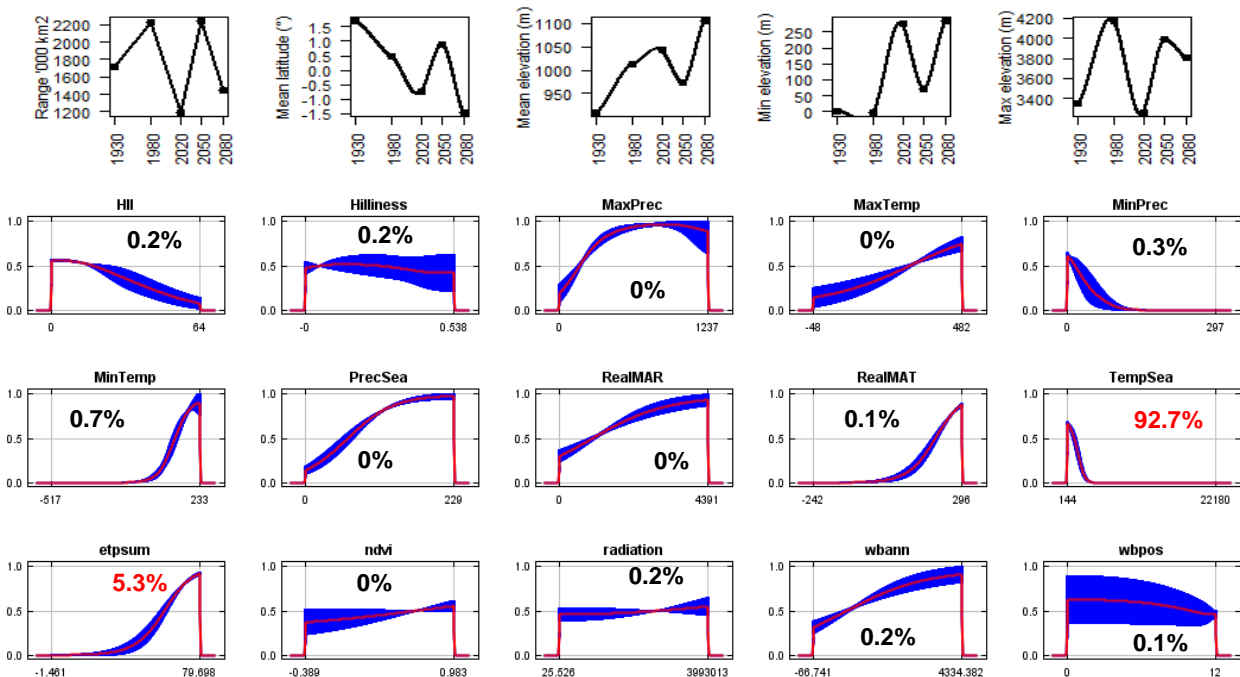

**#17 – Tehuantepec jackrabbit (*Lepus flavigularis*)**

*n* = 8

**Expert:** Arturo Carillo-Reyes, Universidad de Ciencias y Artes de Chiapas

**Expert evaluation:** Poor

**Data:** Modern and historic

**Envelope:** Climatic and habitat

**Dispersal distance:** 0.01km/year (Expert)

**Status:** UNMODELLABLE; **Included in final analysis:** X

| <b>Model evaluation metric</b> |             |
|--------------------------------|-------------|
| AUC                            | 0.99        |
| Omission rate                  | 0.00        |
| Sensitivity                    | 1.00        |
| Specificity                    | 0.99        |
| Proportion correct             | 0.99        |
| <b>Kappa</b>                   | <b>0.95</b> |
| True Skill Statistic           | 0.99        |

**Summary:** The Tehuantepec jackrabbit’s bioclimatic envelope is predicted to decrease by 45% with a ~1° mean latitudinal poleward shift and a mean increase in elevation of ~450m driven by an increase in maximum and minimum elevation. 95% of the permutation importance of the model was contributed to by temperature seasonality (81.7%), mean annual temperature (2.7%) and normalised difference vegetation index (1.7%).

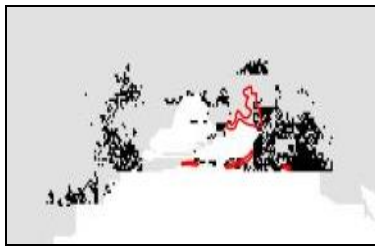

a) ~ 1930s (1900-1949)

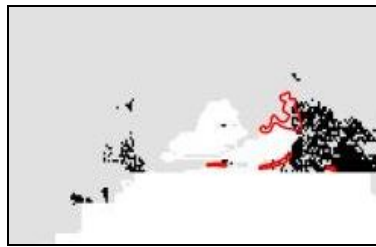

b) ~ 1980s (1950-2000)

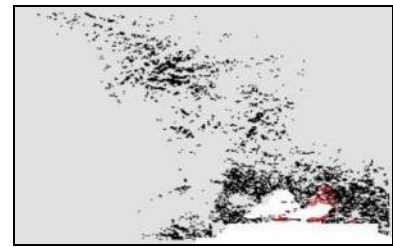

c) ~ 2020s (2010-2039)

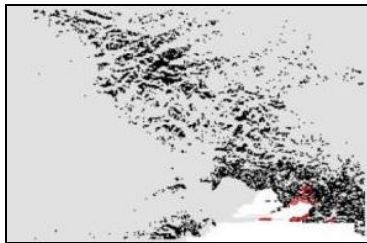

d) ~ 2050s (2040-2069)

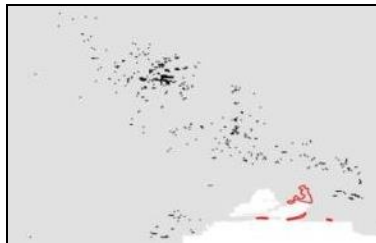

e) ~ 2080s (2070-2099)

**Black** = predicted suitable envelope

**Red polygon** = IUCN range (Cervantes, F.A., *et al.* 2008)

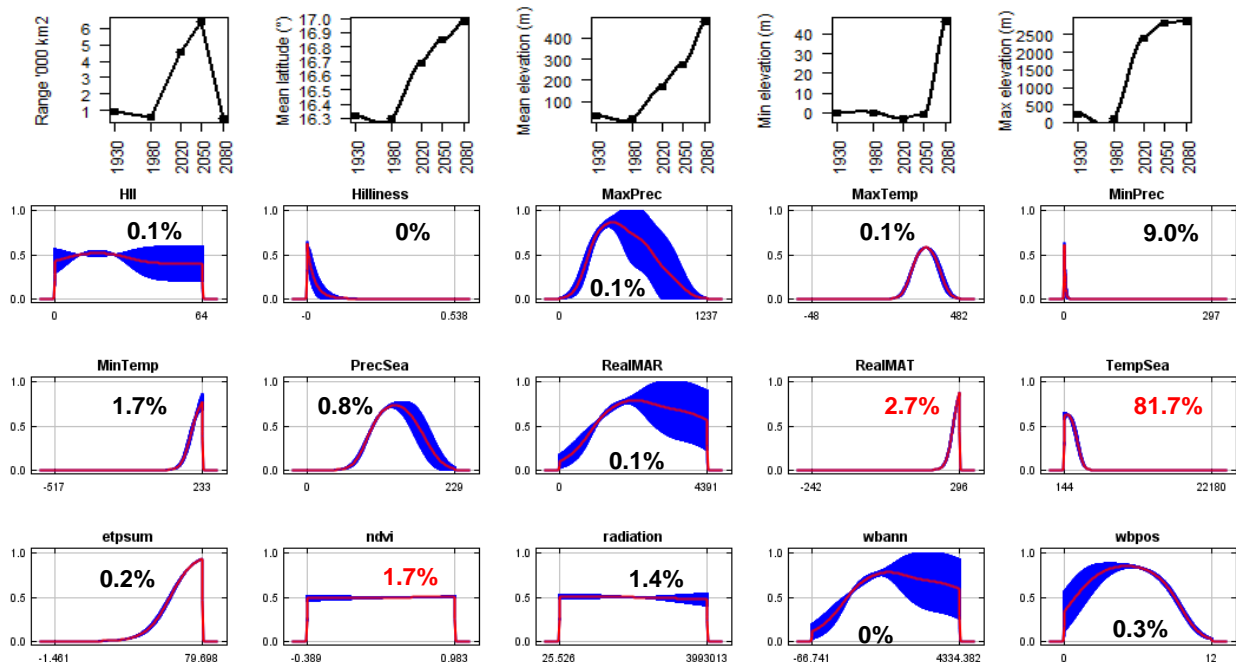



**#18 – Iberian hare (*Lepus granatensis*)**

*n* = 1675

**Expert:** Pelayo Acevedo, University of Porto

**Expert evaluation:** Medium

**Data:** Modern and historic

**Envelope:** Climatic and habitat

**Dispersal distance:** 7km/year (Expert)

**Status:** MODELLABLE; **Included in final analysis:** ✓

| Model evaluation metric |             |
|-------------------------|-------------|
| AUC                     | 0.94        |
| Omission rate           | 0.08        |
| Sensitivity             | 0.92        |
| Specificity             | 0.95        |
| Proportion correct      | 0.95        |
| <b>Kappa</b>            | <b>0.81</b> |
| True Skill Statistic    | 0.87        |

**Summary:** The Iberian hare’s bioclimatic envelope is predicted to increase by 40% with a ~1° mean latitudinal poleward shift and a mean increase in elevation of ~10m driven by an increase in maximum elevation. 95% of the permutation importance of the model was contributed to by maximum precipitation (39.0%), annual evapotranspiration (38.0%), minimum temperature (15.0%) and maximum temperature (3.0%).

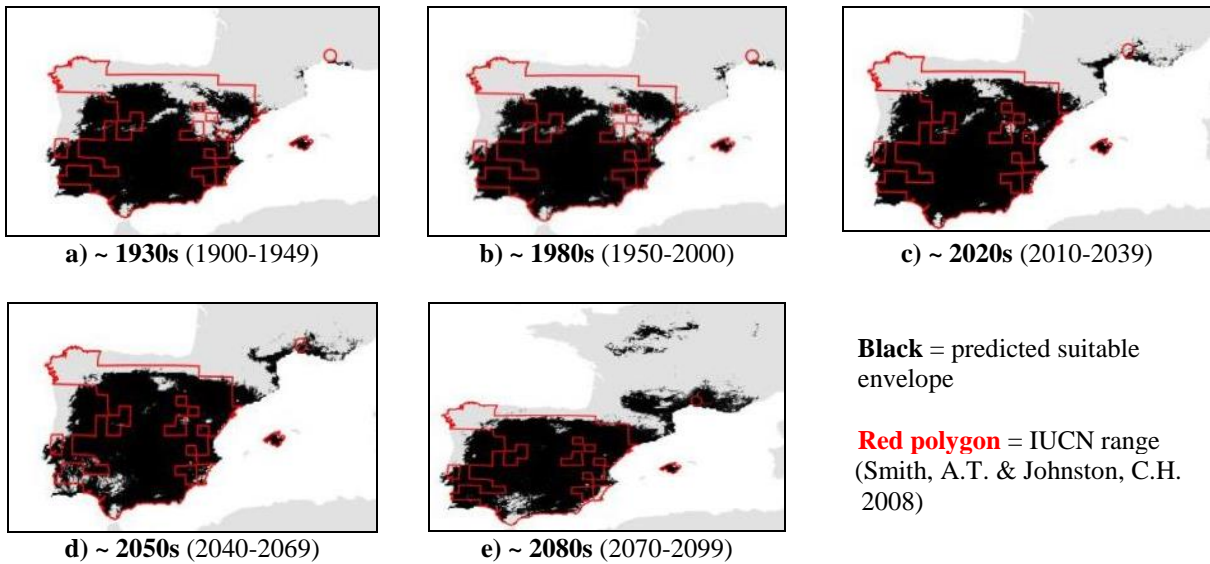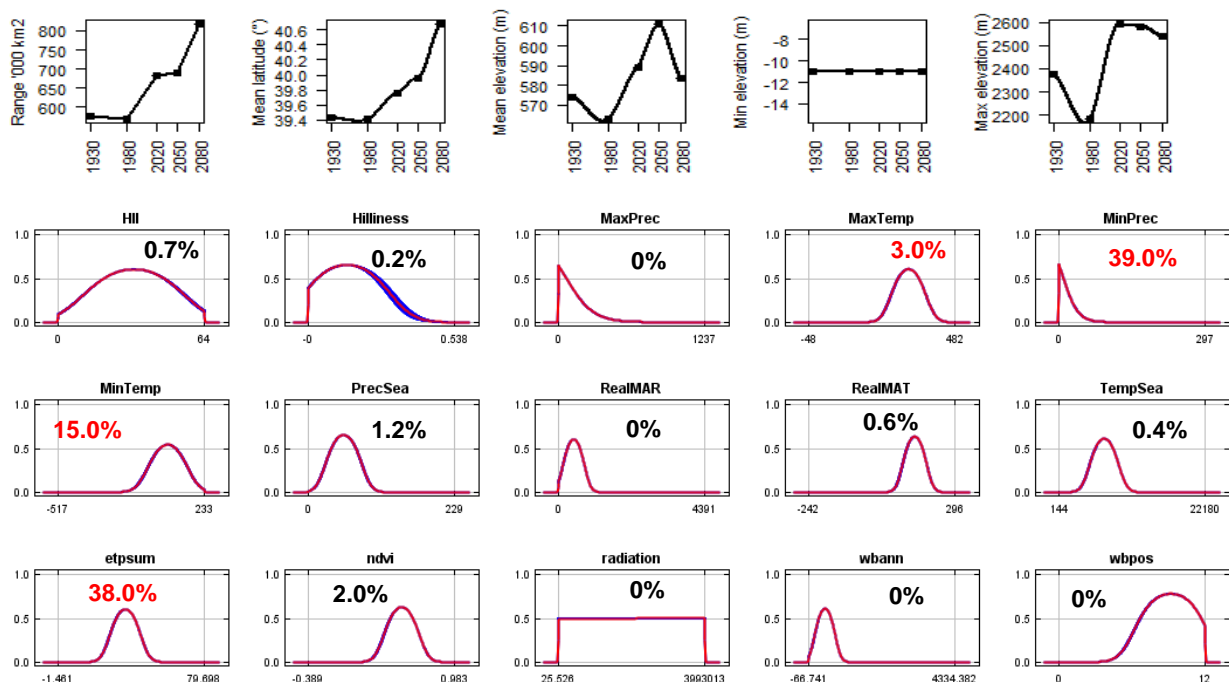

**#19 – Abyssinian hare (*Lepus habessinicus*)**

*n* = 7

**Expert:** Zelalem Tolesa, Addis Ababa University

**Expert evaluation:** Medium

**Data:** Modern and historic

**Envelope:** Climatic and habitat

**Dispersal distance:** 25km/year (African leporids, range 15-35)

**Status:** MODELLABLE; **Included in final analysis:** ✓

| Model evaluation metric |             |
|-------------------------|-------------|
| AUC                     | 0.99        |
| Omission rate           | 0.00        |
| Sensitivity             | 1.00        |
| Specificity             | 0.99        |
| Proportion correct      | 0.99        |
| <b>Kappa</b>            | <b>0.82</b> |
| True Skill Statistic    | 0.99        |

**Summary:** The Abyssinian hare’s bioclimatic envelope is predicted to decrease by 4% with a ~4° mean latitudinal shift towards the Equator and a mean decrease in elevation of ~200m driven by an decrease in maximum elevation. 95% of the permutation importance of the model was contributed to by temperature seasonality (87.6%), annual evapotranspiration (4.9%) and minimum precipitation (4.1%).

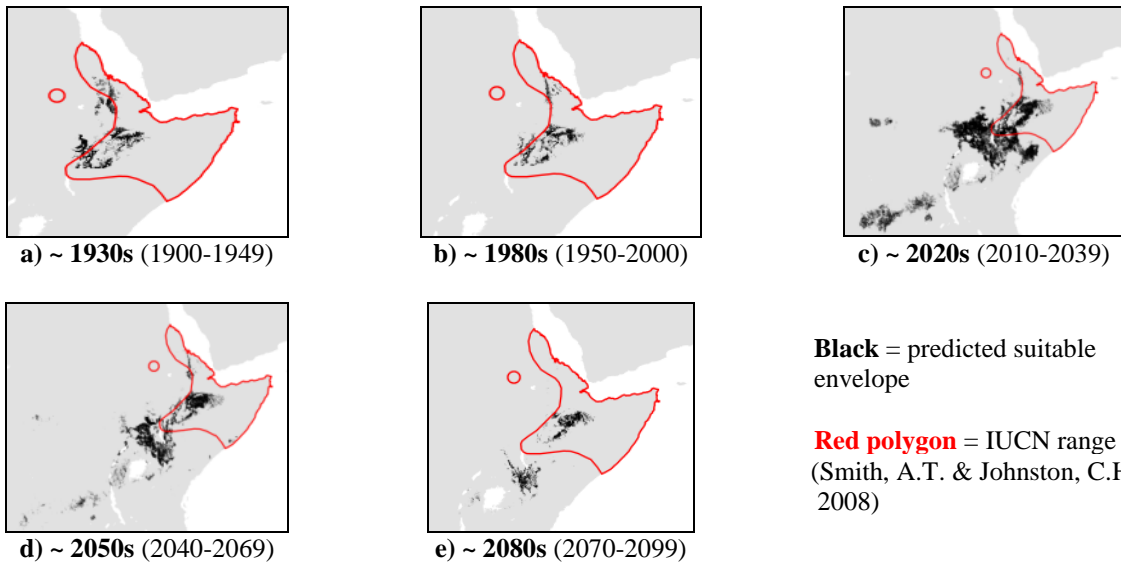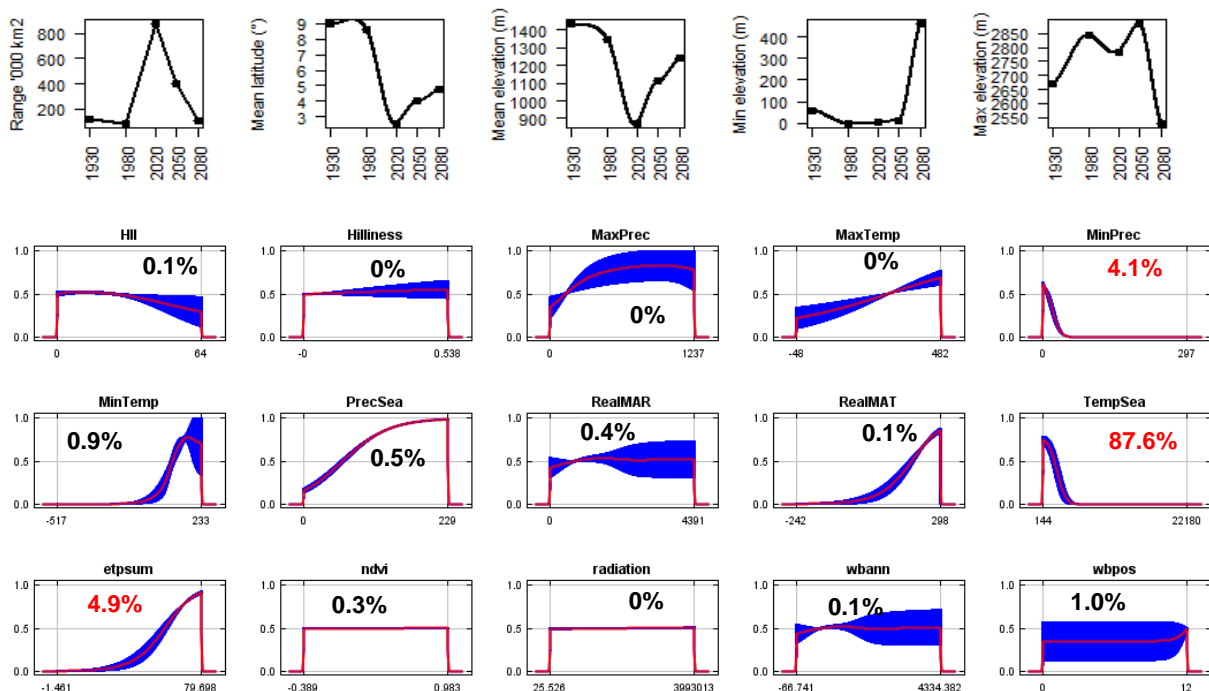

**#20 – Hainan hare (*Lepus hainanus*)**

*n* = 9

**Expert:** Youhua Chen, Wuhan University, China

**Expert evaluation:** Good

**Data:** Modern and historic

**Envelope:** Climatic and habitat

**Dispersal distance:** 0.01km/year (Island species, range 0.01-0.01)

**Status:** MODELLABLE; **Included in final analysis:** ✓

| Model evaluation metric |             |
|-------------------------|-------------|
| AUC                     | 0.99        |
| Omission rate           | 0.00        |
| Sensitivity             | 1.00        |
| Specificity             | 0.99        |
| Proportion correct      | 0.99        |
| <b>Kappa</b>            | <b>0.86</b> |
| True Skill Statistic    | 0.99        |

**Summary:** The Hainan hare’s bioclimatic envelope is predicted to increase by 4% with no latitudinal poleward shift and a mean increase in elevation of ~20m driven by an increase in maximum elevation. 95% of the permutation importance of the model was contributed to by minimum temperature (71.0%), mean annual temperature (22.8%) and temperature seasonality (5.4%).

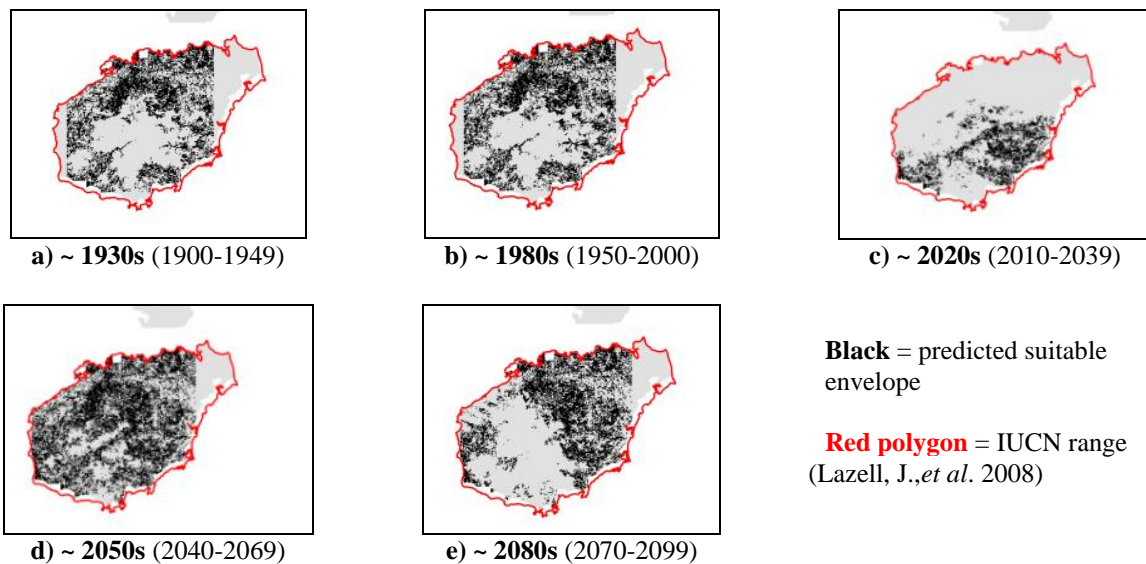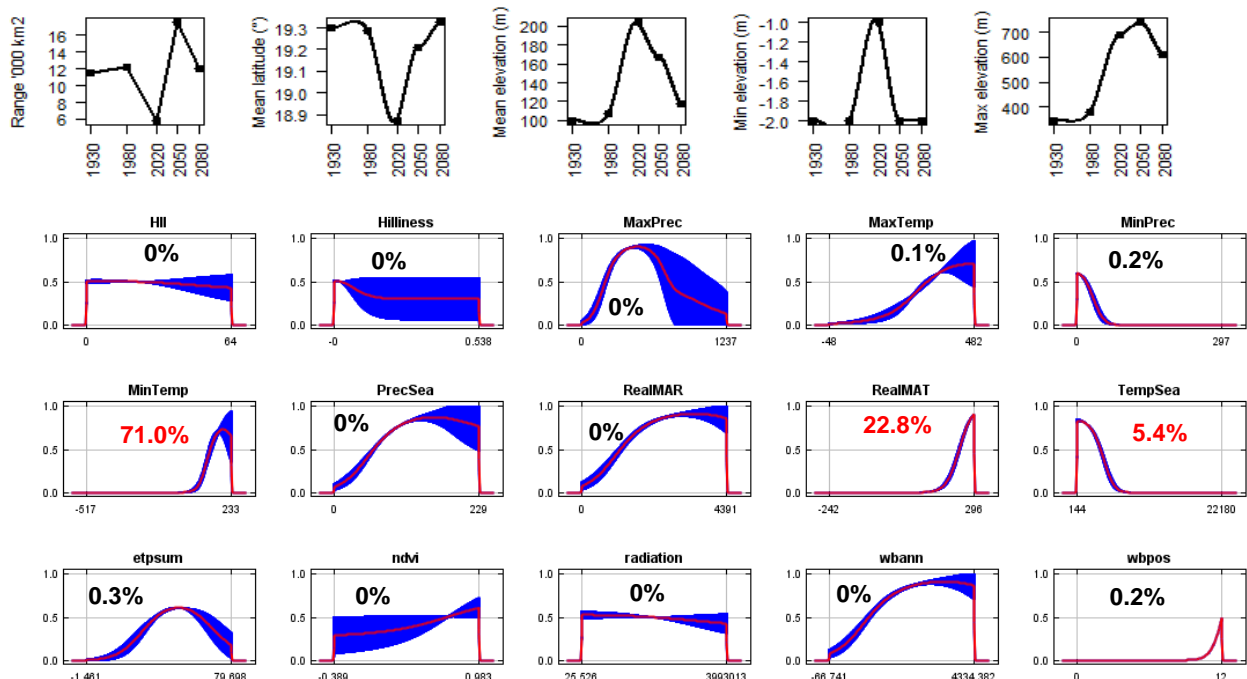

**#21 – Black jackrabbit (*Lepus insularis*)**

*n* = 3

**Expert:** Tamara Rioja Pardela, Universidad de Ciencias y Artes de Chiapas, Mexico

**Expert evaluation:** Good

**Data:** Modern and historic

**Envelope:** Climatic and habitat

**Dispersal distance:** 0.01km/year (Island species, range 0.01-0.01)

**Status:** MODELLABLE; **Included in final analysis:** ✓

| Model evaluation metric |             |
|-------------------------|-------------|
| AUC                     | 1.00        |
| Omission rate           | 0.00        |
| Sensitivity             | 1.00        |
| Specificity             | 1.00        |
| Proportion correct      | 1.00        |
| <b>Kappa</b>            | <b>1.00</b> |
| True Skill Statistic    | 1.00        |

**Summary:** The Black jackrabbit’s bioclimatic envelope is predicted to decrease by 100% with a ~0.3° mean latitudinal polewards shift and a mean increase in elevation of ~50m driven by an increase in both minimum and maximum elevation. 95% of the permutation importance of the model was contributed to by precipitation seasonality (28.6%), minimum precipitation (16.5%), annual water balance (13.3%), minimum temperature (12.9%), mean annual temperature (7.1%), temperature seasonality (5.5%), surface roughness index (5.0%) and normalised difference vegetation index (3.2%).

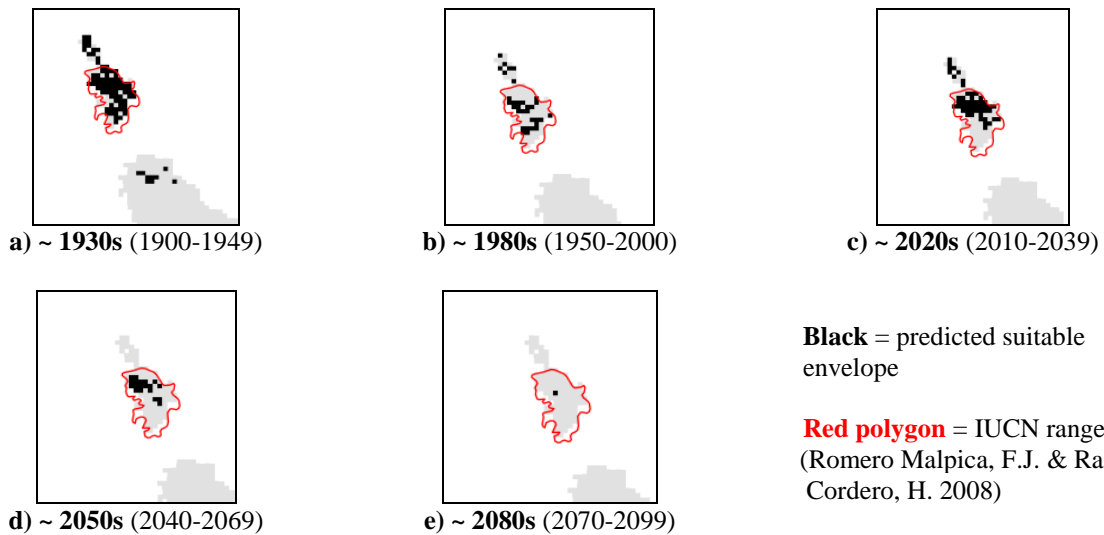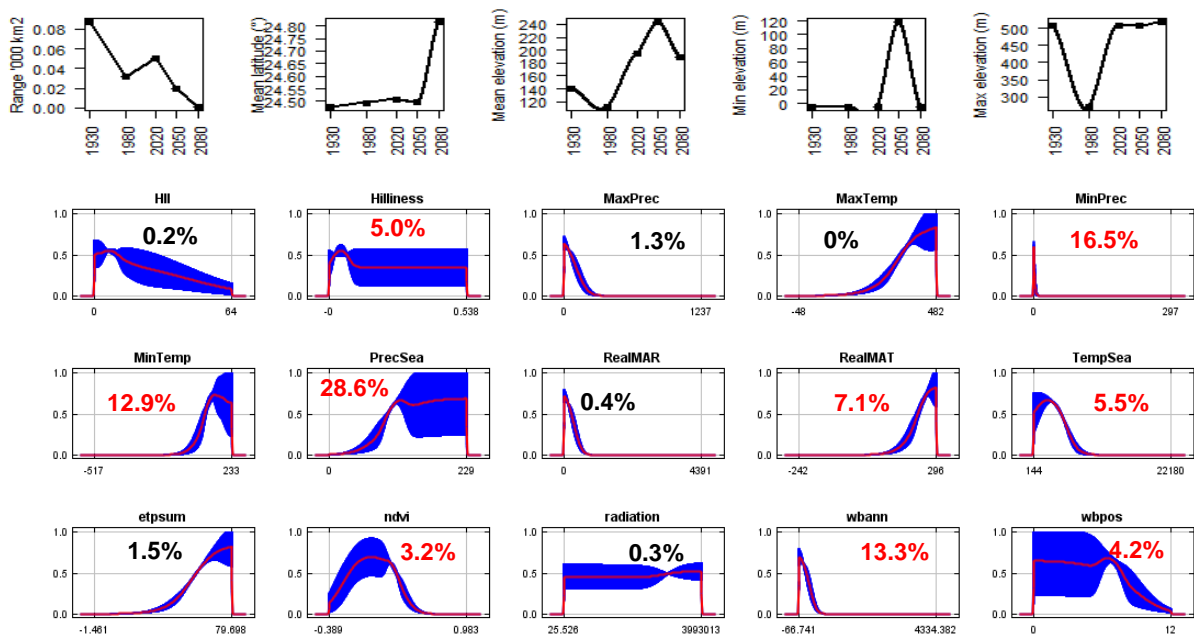

**#22 – Manchurian hare (*Lepus mandshuricus*)**

*n* = 36

**Expert:** Deyan Ge, Institute of Zoology, Chinese Academy of Sciences

**Expert evaluation:** Medium

**Data:** Modern and historic

**Envelope:** Climatic and habitat

**Dispersal distance:** 3km/year (Sokolov, V.E. *et al.*, 2009)

**Status:** MODELLABLE; **Included in final analysis:** ✓

| Model evaluation metric |             |
|-------------------------|-------------|
| AUC                     | 0.96        |
| Omission rate           | 0.08        |
| Sensitivity             | 0.92        |
| Specificity             | 0.99        |
| Proportion correct      | 0.99        |
| <b>Kappa</b>            | <b>0.78</b> |
| True Skill Statistic    | 0.92        |

**Summary:** The Manchurian hare’s bioclimatic envelope is predicted to decrease by 50% with a ~1° mean latitudinal polewards shift and a mean increase in elevation of ~70m driven by an increase in maximum and minimum elevation. 95% of the permutation importance of the model was contributed to by precipitation seasonality (77.3%), mean annual temperature (10.4%), minimum temperature (4.5%), normalised difference vegetation index (2.6%) and annual evapotranspiration (2.4%).

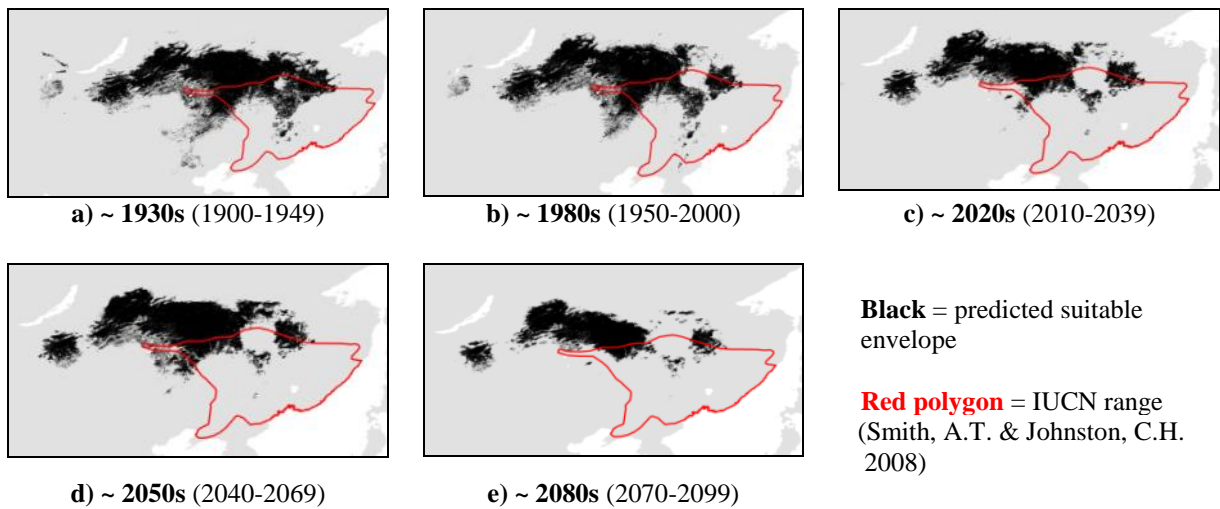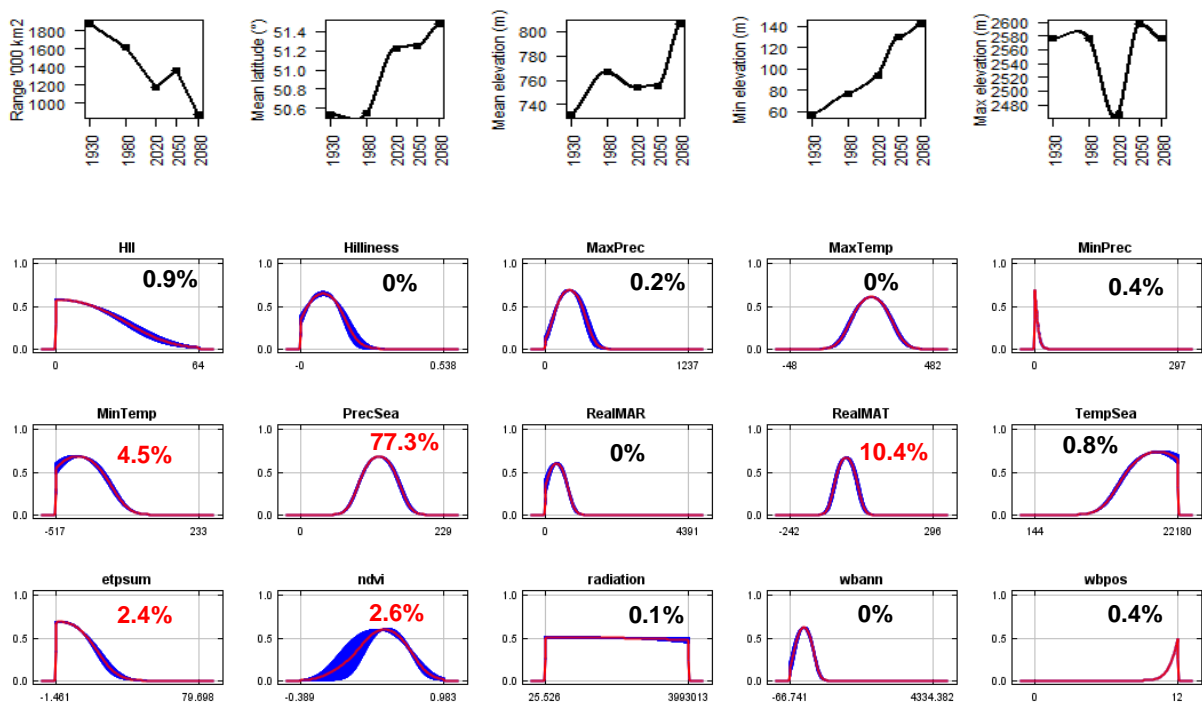

**#23 – African savannah hare (*Lepus microtis*)**

*n* = 82

**Expert:** John Flux, IUCN Lagomorph Specialist Group

**Expert evaluation:** Medium

**Data:** Modern and historic

**Envelope:** Climatic only

**Dispersal distance:** 15km/year (Expert)

**Status:** MODELLABLE; **Included in final analysis:** ✓

| Model evaluation metric |             |
|-------------------------|-------------|
| AUC                     | 0.93        |
| Omission rate           | 0.13        |
| Sensitivity             | 0.87        |
| Specificity             | 0.99        |
| Proportion correct      | 0.99        |
| <b>Kappa</b>            | <b>0.62</b> |
| True Skill Statistic    | 0.86        |

**Summary:** The African savannah hare’s bioclimatic envelope is predicted to decrease by 15% with a ~3° mean latitudinal polewards shift and a mean increase in elevation of ~100m driven by an increase in maximum and minimum elevation. 95% of the permutation importance of the model was contributed to by mean annual temperature (40.9%), maximum temperature (18.5%), annual evapotranspiration (9.2%), minimum precipitation (6.2%), temperature seasonality (5.4%), mean annual precipitation (5.4%), minimum temperature (4.9%), precipitation seasonality (4.1%) and annual water balance (1.7%).

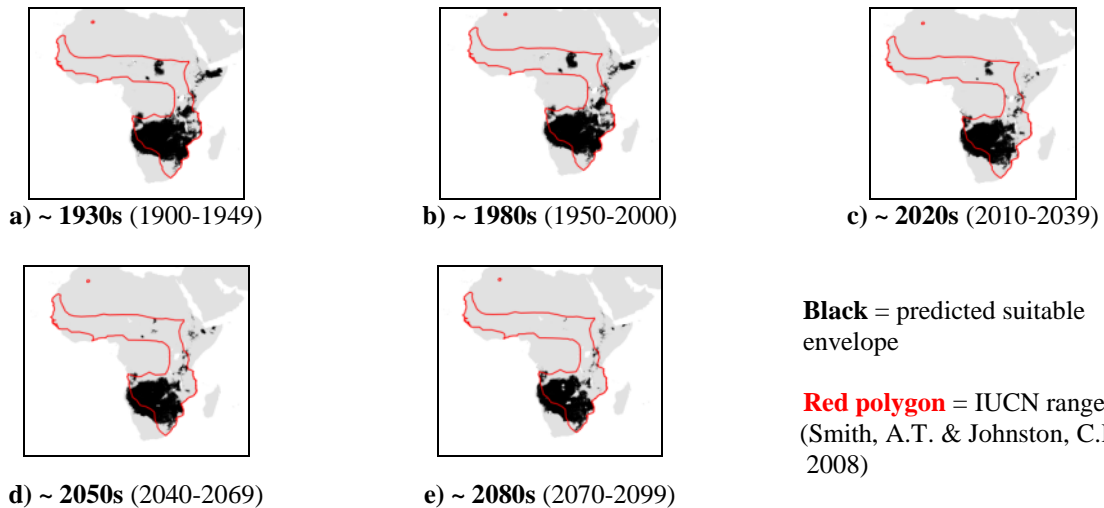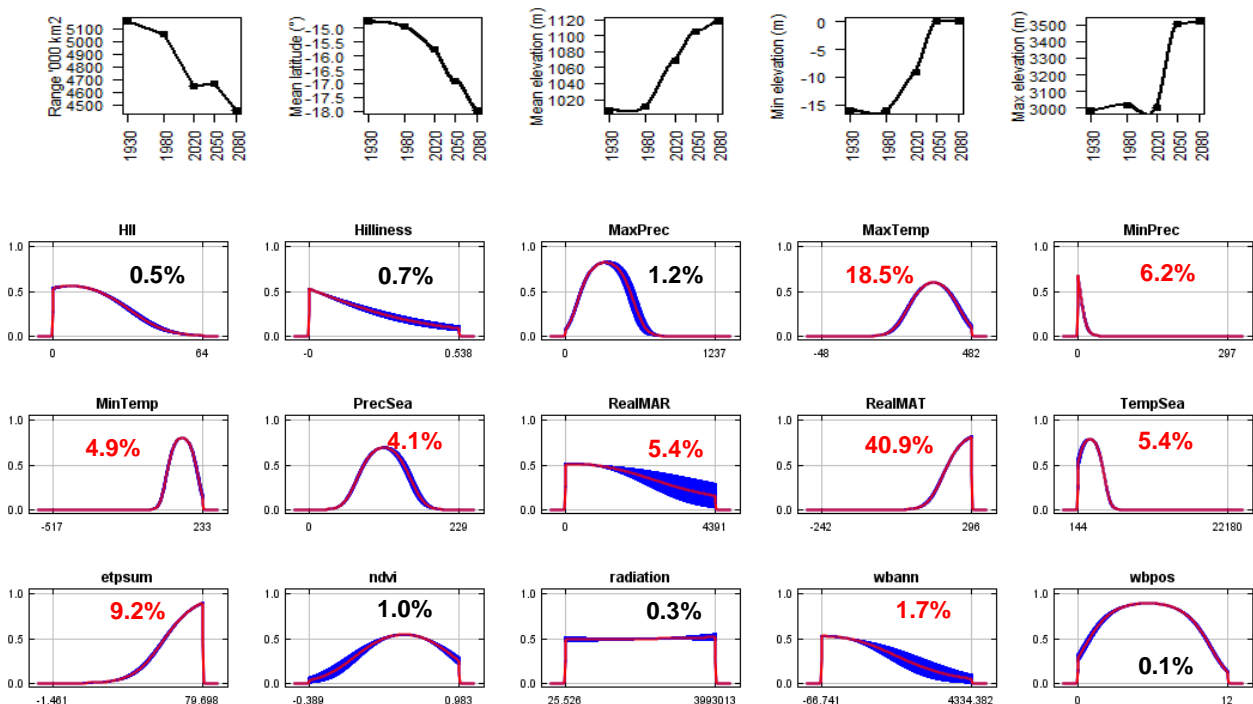



**#24 – Indian hare (*Lepus nigricollis*)**

*n* = 17

**Expert:** Gopinathan Maheswaran , Zoological Survey of India

**Expert evaluation:** Good

**Data:** Modern and historic

**Envelope:** Climatic and habitat

**Dispersal distance:** 6km/year (Expert)

**Status:** MODELLABLE; **Included in final analysis:** √

| Model evaluation metric |             |
|-------------------------|-------------|
| AUC                     | 0.99        |
| Omission rate           | 0.00        |
| Sensitivity             | 1.00        |
| Specificity             | 0.99        |
| Proportion correct      | 0.99        |
| <b>Kappa</b>            | <b>0.59</b> |
| True Skill Statistic    | 0.99        |

**Summary:** The Indian hare’s bioclimatic envelope is predicted to decrease by 10% with a ~2° mean latitudinal polewards shift and a mean increase in elevation of ~80m driven by an increase in maximum and minimum elevation. 95% of the permutation importance of the model was contributed to by precipitation seasonality (48.0%), mean annual temperature (14.9%), human influence index (11.9%), minimum temperature (10.3%), temperature seasonality (7.0%), number of months with a positive water balance (2.8%) and minimum precipitation (1.5%).

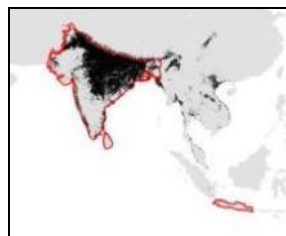

a) ~ 1930s (1900-1949)

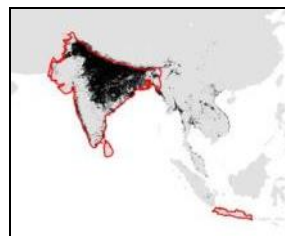

b) ~ 1980s (1950-2000)

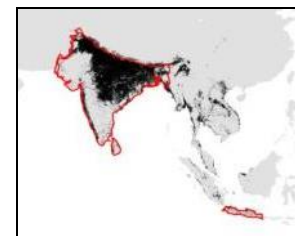

c) ~ 2020s (2010-2039)

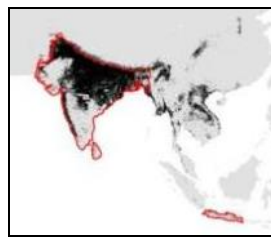

d) ~ 2050s (2040-2069)

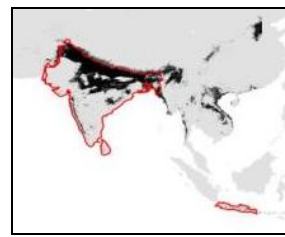

e) ~ 2080s (2070-2099)

**Black** = predicted suitable envelope

**Red polygon** = IUCN range (Maheswaran, G. & Jordan, M. 2008)

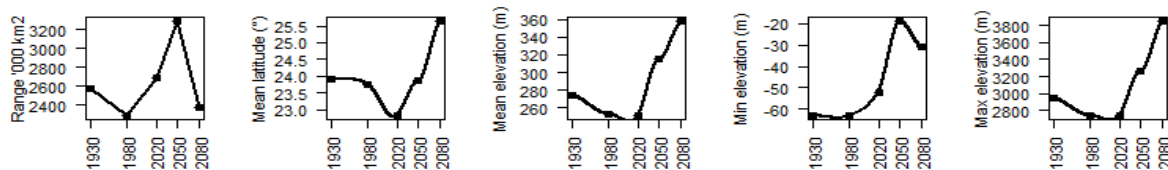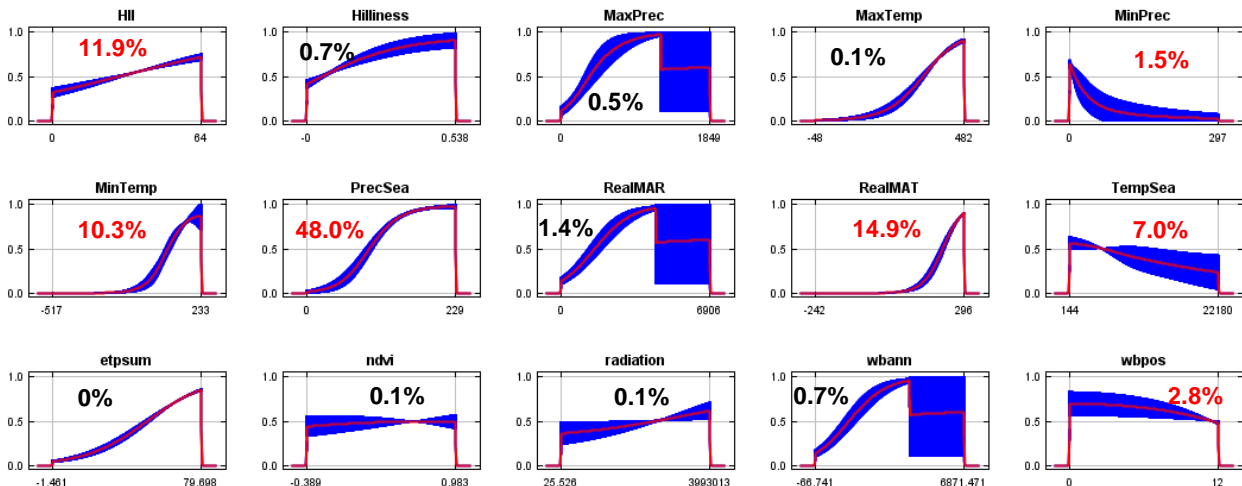



**#25 – Woolly hare (*Lepus oiostolus*)**

*n* = 84

**Expert:** Weihe Yang , Institute of Zoology, Chinese Academy of Sciences

**Expert evaluation:** Medium

**Data:** Only modern

**Envelope:** Climatic and habitat

**Dispersal distance:** 2.5km/year (Asian leporids, range 1-35)

**Status:** MODELLABLE; **Included in final analysis:** ✓

| <b>Model evaluation metric</b> |             |
|--------------------------------|-------------|
| AUC                            | 0.94        |
| Omission rate                  | 0.11        |
| Sensitivity                    | 0.89        |
| Specificity                    | 0.99        |
| Proportion correct             | 0.99        |
| <b>Kappa</b>                   | <b>0.63</b> |
| True Skill Statistic           | 0.89        |

**Summary:** The Woolly hare’s bioclimatic envelope is predicted to decrease by 25% with a ~1° mean latitudinal shift towards the Equator and a mean increase in elevation of ~680m driven by an increase in maximum and minimum elevation. 95% of the permutation importance of the model was contributed to by minimum precipitation (82.1%), maximum temperature (5.0%), minimum temperature (4.6%) and annual evapotranspiration (3.8%).

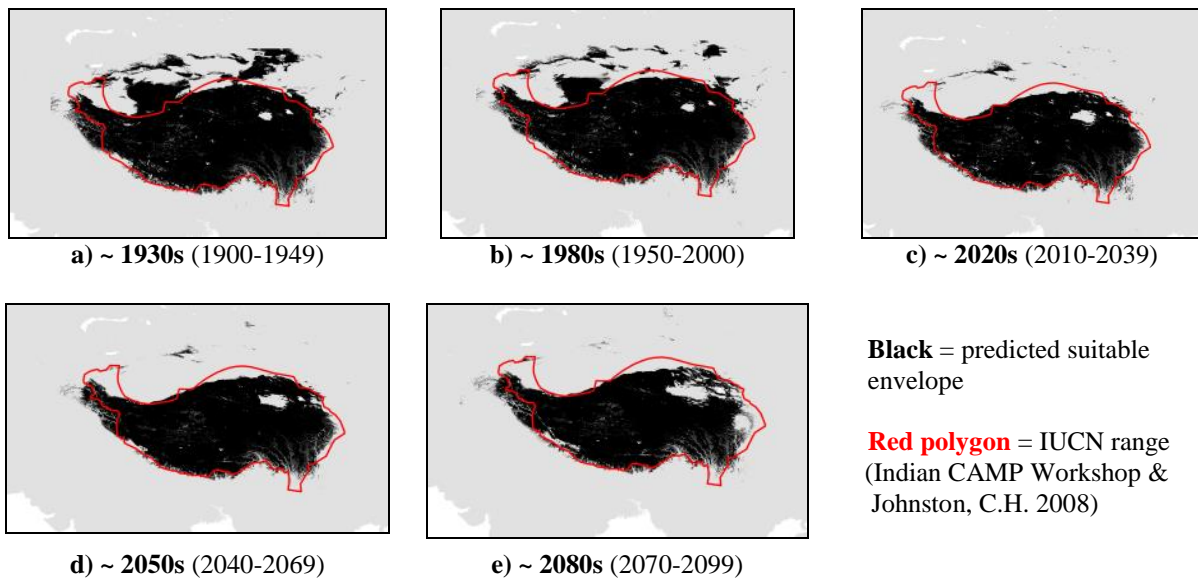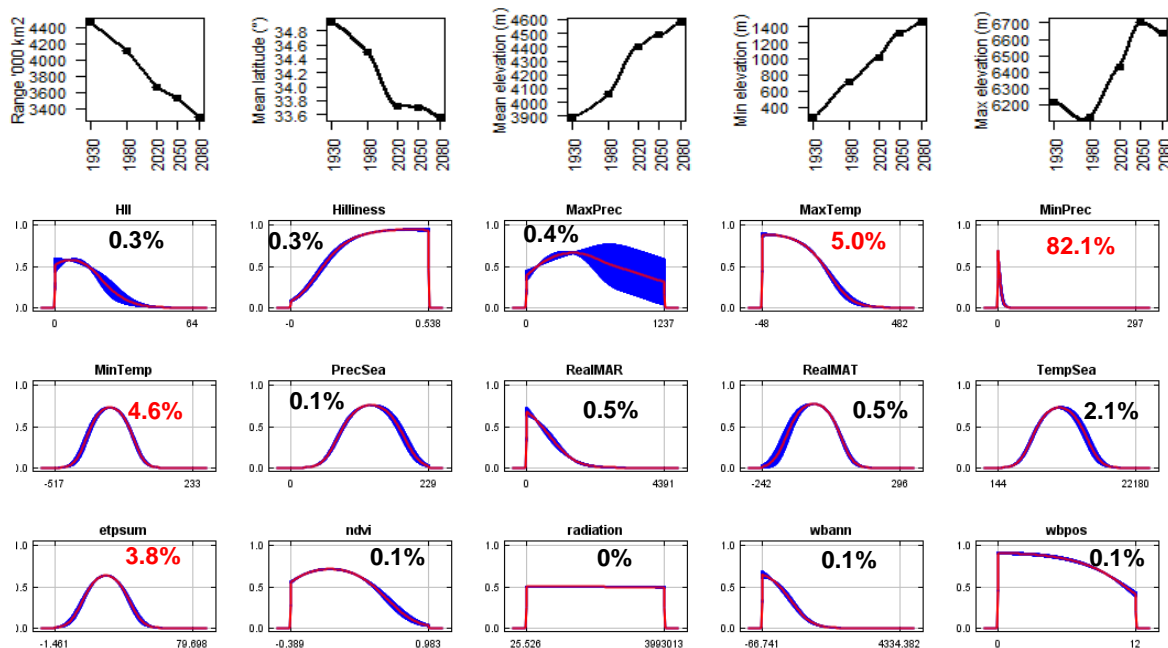

**#26 – Alaskan hare (*Lepus othus*)**

*n* = 8

**Expert:** Eric Waltari, City University of New York

**Expert evaluation:** Medium

**Data:** Modern and historic

**Envelope:** Climatic only

**Dispersal distance:** 2km/year (similar to Arctic hare)

**Status:** MODELLABLE; **Included in final analysis:** ✓

| Model evaluation metric |             |
|-------------------------|-------------|
| AUC                     | 0.99        |
| Omission rate           | 0.00        |
| Sensitivity             | 1.00        |
| Specificity             | 0.99        |
| Proportion correct      | 0.99        |
| <b>Kappa</b>            | <b>0.89</b> |
| True Skill Statistic    | 0.99        |

**Summary:** The Alaskan hare’s bioclimatic envelope is predicted to increase by 80% with a ~3° mean latitudinal polewards shift and a mean increase in elevation of ~100m driven by an increase in minimum elevation. 95% of the permutation importance of the model was contributed to by annual evapotranspiration (52.8%), mean annual temperature (26.4%), precipitation seasonality (11.3%) and mean annual precipitation (5.0%).

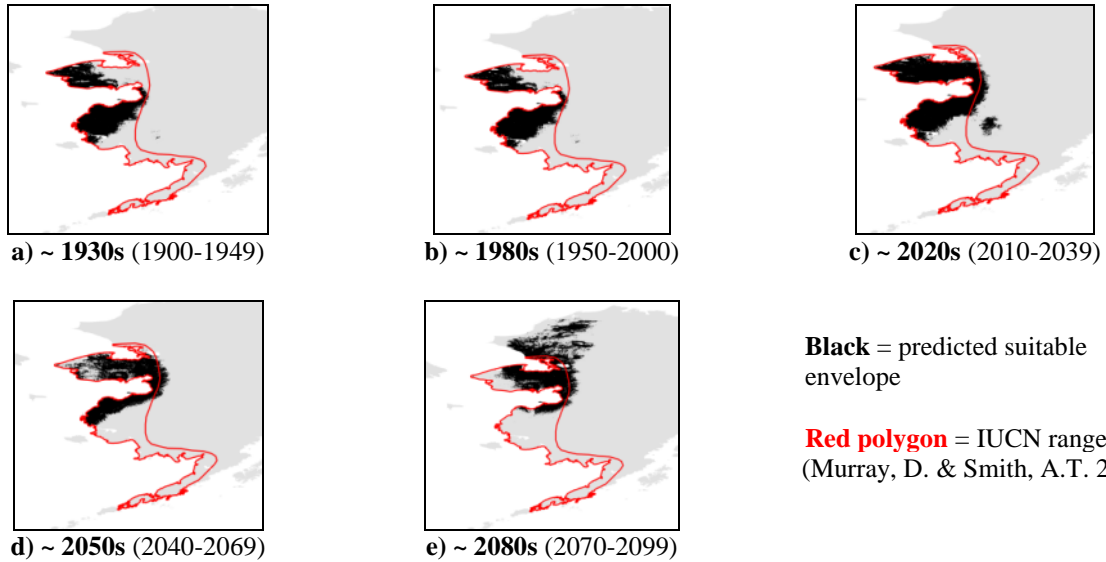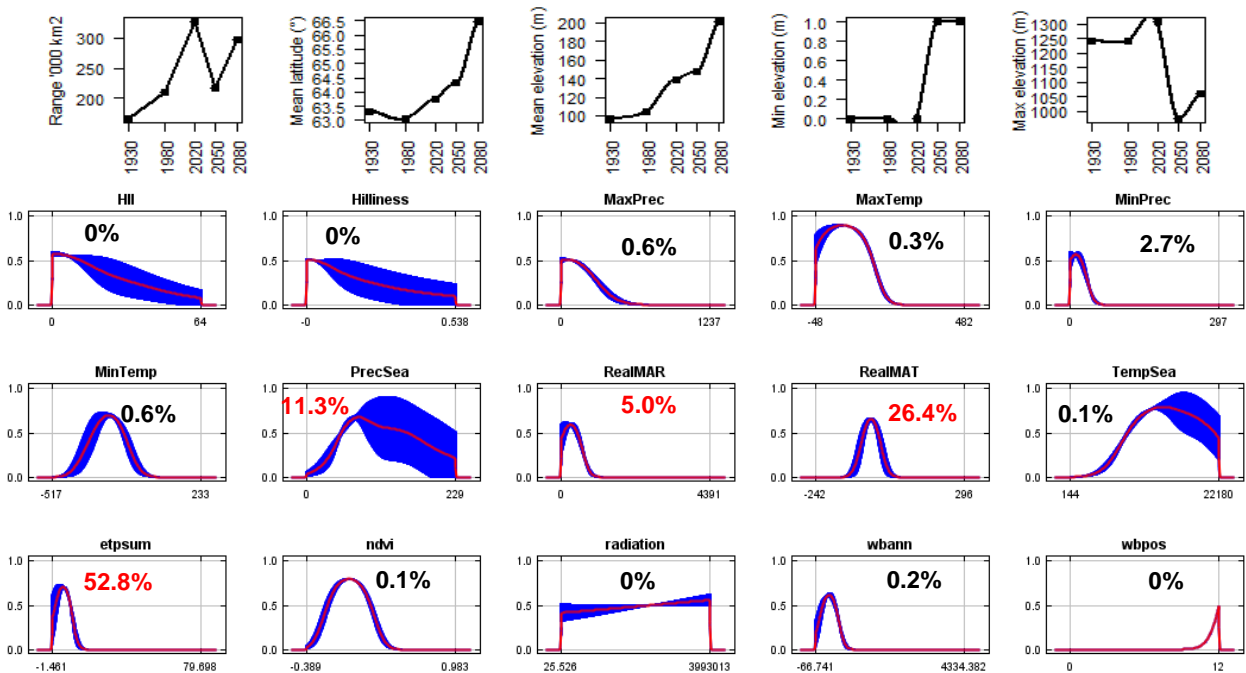

**#27 – Burmese hare (*Lepus penguensis*)**

*n* = 7

**Expert:** Thomas Gray, WWF Greater Mekong

**Expert evaluation:** Medium

**Data:** Modern and historic

**Envelope:** Climatic and habitat

**Dispersal distance:** 2.5km/year (Asian leporids, range 1-35)

**Status:** MODELLABLE; **Included in final analysis:** √

| Model evaluation metric |             |
|-------------------------|-------------|
| AUC                     | 0.99        |
| Omission rate           | 0.00        |
| Sensitivity             | 1.00        |
| Specificity             | 0.99        |
| Proportion correct      | 0.99        |
| <b>Kappa</b>            | <b>0.58</b> |
| True Skill Statistic    | 0.99        |

**Summary:** The Burmese hare’s bioclimatic envelope is predicted to increase by 40% with a ~2° mean latitudinal polewards shift and a mean increase in elevation of ~180m driven by an increase in minimum and maximum elevation. 95% of the permutation importance of the model was contributed to by temperature seasonality (52.6%), minimum precipitation (32.9%), solar radiation (6.5%) and mean annual temperature (4.3%).

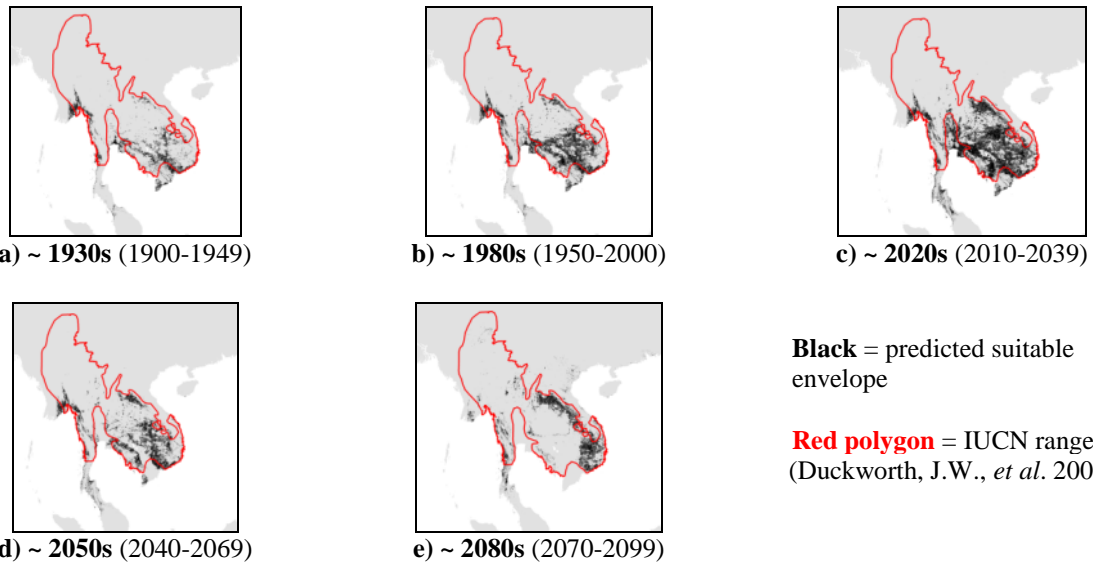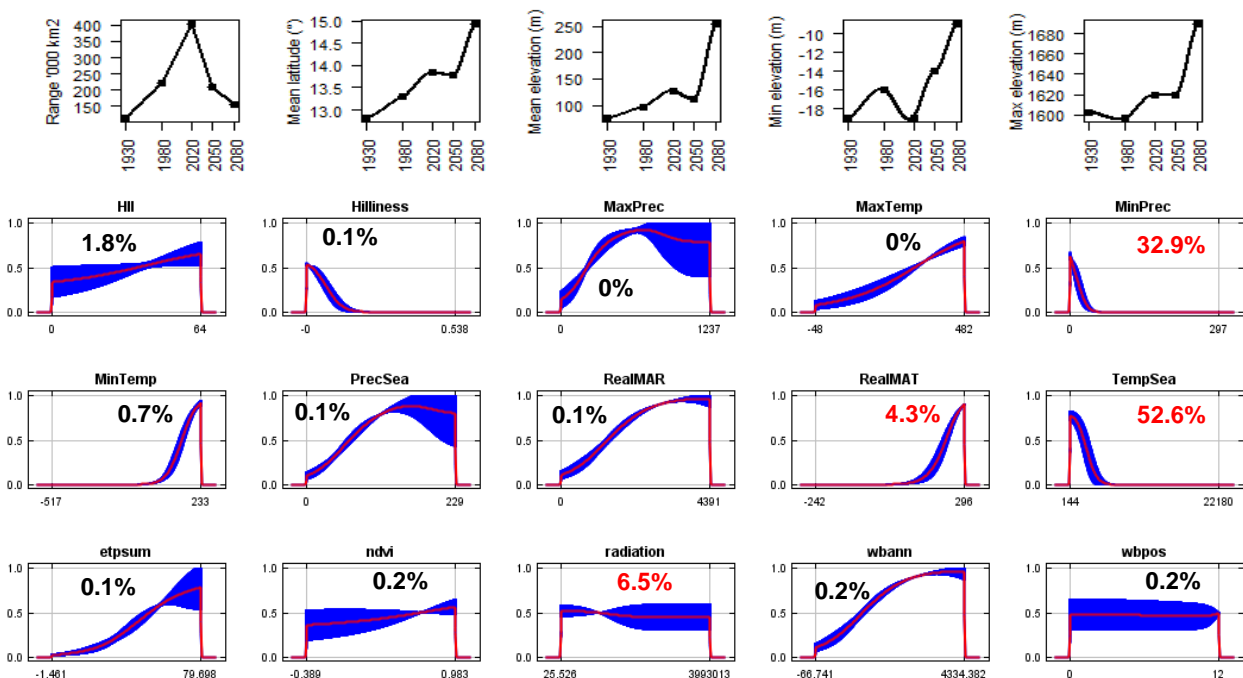

**#28 – Scrub hare (*Lepus saxatilis*)**

*n* = 39

**Expert:** Kai Collins, University of Pretoria

**Expert evaluation:** Poor

**Data:** Only modern

**Envelope:** Climatic and habitat

**Dispersal distance:** 25km/year (African leporids, range 15-35)

**Status:** UNMODELLABLE; **Included in final analysis:** X

| Model evaluation metric |             |
|-------------------------|-------------|
| AUC                     | 0.95        |
| Omission rate           | 0.08        |
| Sensitivity             | 0.92        |
| Specificity             | 0.97        |
| Proportion correct      | 0.97        |
| <b>Kappa</b>            | <b>0.18</b> |
| True Skill Statistic    | 0.89        |

**Summary:** The Scrub hare’s bioclimatic envelope is predicted to decrease by 15% with a ~2° mean latitudinal shift towards the Equator and a mean increase in elevation of ~65m driven by an increase in maximum and minimum elevation. 95% of the permutation importance of the model was contributed to by annual evapotranspiration (52.8%), mean annual temperature (26.4%), precipitation seasonality (11.3%) and mean annual precipitation (5.0%).

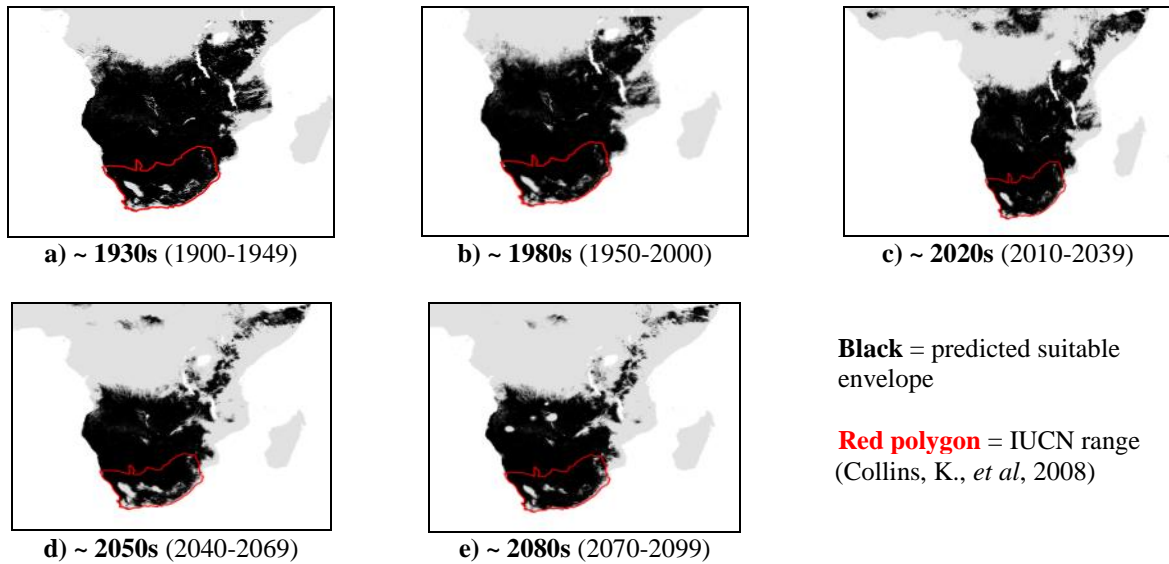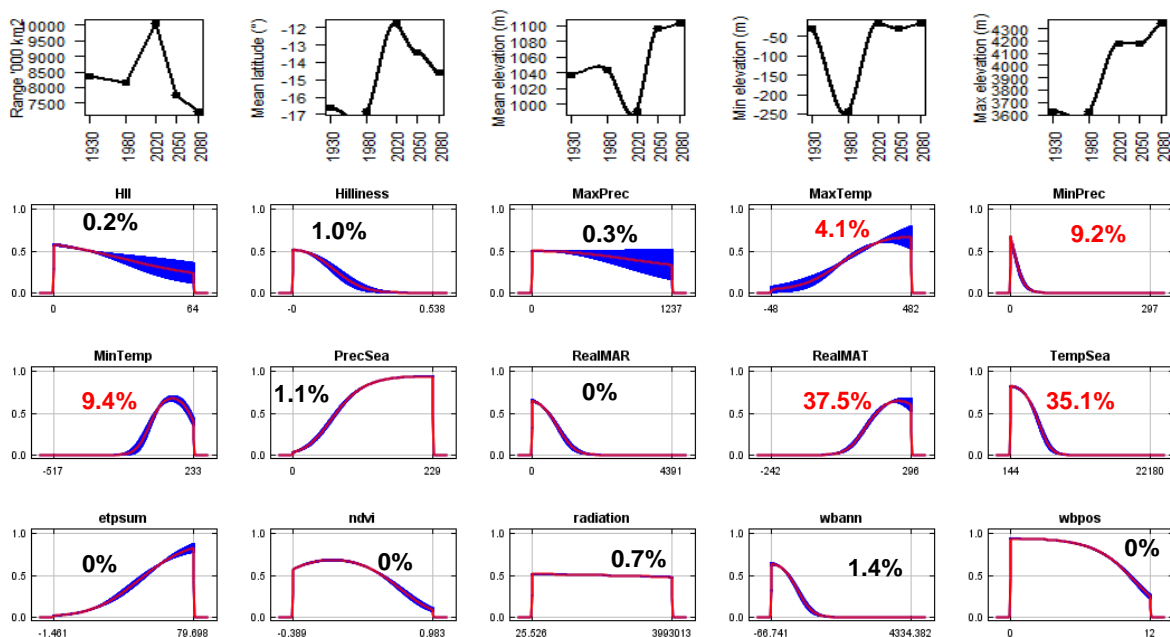

**#29 – Chinese hare (*Lepus sinensis*)**

*n* = 141

**Expert:** Weihe Yang, Institute of Zoology, Chinese Academy of Sciences

**Expert evaluation:** Medium

**Data:** Modern and historic

**Envelope:** Climatic and habitat

**Dispersal distance:** 2.5km/year (Asian leporids, range 1-35)

**Status:** MODELLABLE; **Included in final analysis:** ✓

| Model evaluation metric |             |
|-------------------------|-------------|
| AUC                     | 0.94        |
| Omission rate           | 0.11        |
| Sensitivity             | 0.89        |
| Specificity             | 0.99        |
| Proportion correct      | 0.99        |
| <b>Kappa</b>            | <b>0.81</b> |
| True Skill Statistic    | 0.89        |

**Summary:** The Chinese hare's bioclimatic envelope is predicted to increase by 60% with a ~2° mean latitudinal polewards shift and a mean increase in elevation of ~25m driven by an increase in maximum elevation. 95% of the permutation importance of the model was contributed to by mean annual temperature (56.5%), temperature seasonality (22.9%), precipitation seasonality (8.0%), mean annual precipitation (5.4%) and annual evapotranspiration (3.5%).

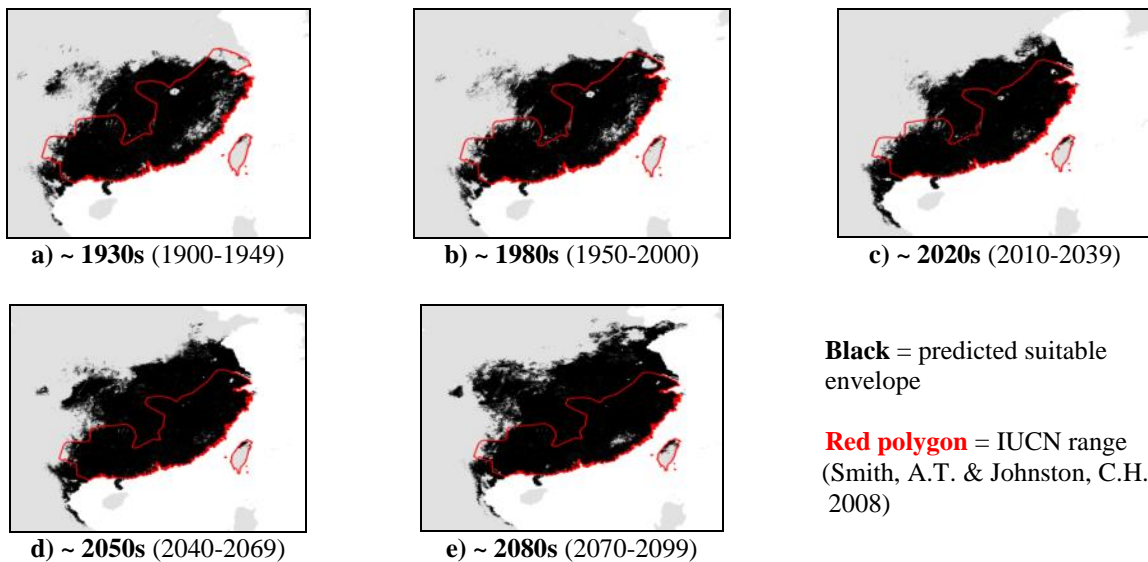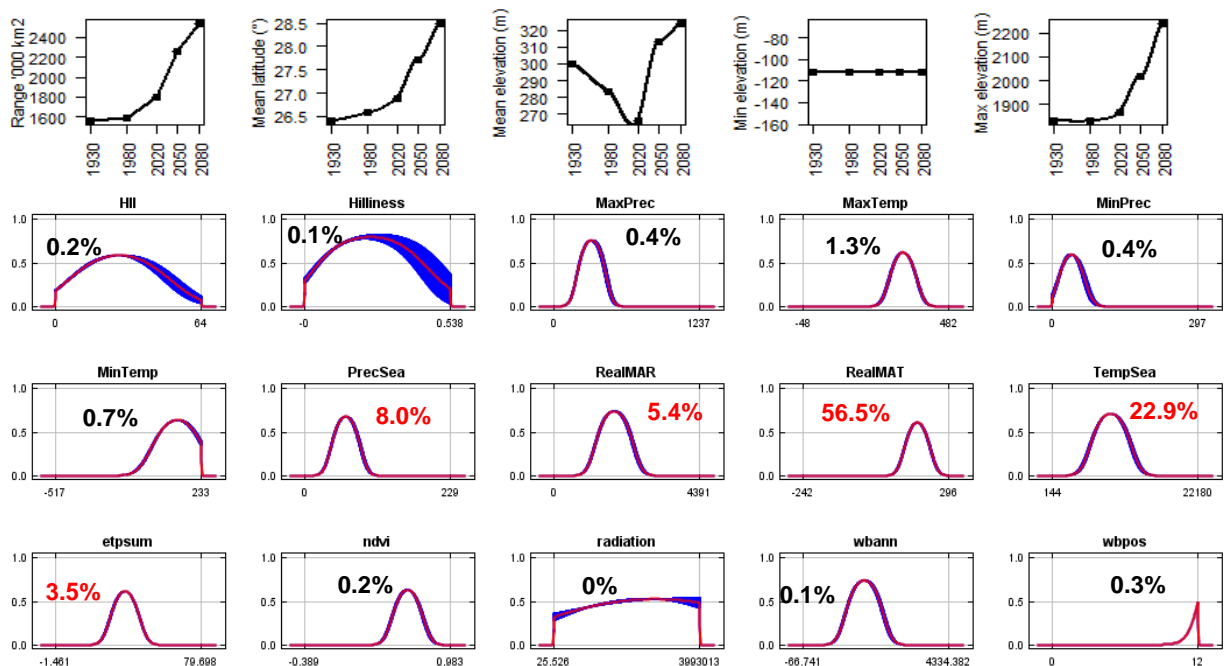

**#30 – Ethiopian highland hare (*Lepus starcki*)**

*n* = 13

**Expert:** Zelalem Tolesa, Addis Ababa University

**Expert evaluation:** Medium

**Data:** Modern and historic

**Envelope:** Climatic and habitat

**Dispersal distance:** 25km/year (African leporids, range 15-35)

**Status:** MODELLABLE; **Included in final analysis:** √

| Model evaluation metric |             |
|-------------------------|-------------|
| AUC                     | 0.96        |
| Omission rate           | 0.08        |
| Sensitivity             | 0.92        |
| Specificity             | 0.99        |
| Proportion correct      | 0.99        |
| <b>Kappa</b>            | <b>0.86</b> |
| True Skill Statistic    | 0.92        |

**Summary:** The Ethiopian highland hare’s bioclimatic envelope is predicted to decrease by 90% with a ~7° mean latitudinal shift towards the Equator and a mean decrease in elevation of ~140m driven by a decrease in maximum elevation. 95% of the permutation importance of the model was contributed to by temperature seasonality (80.6%) and minimum temperature (18.5%).

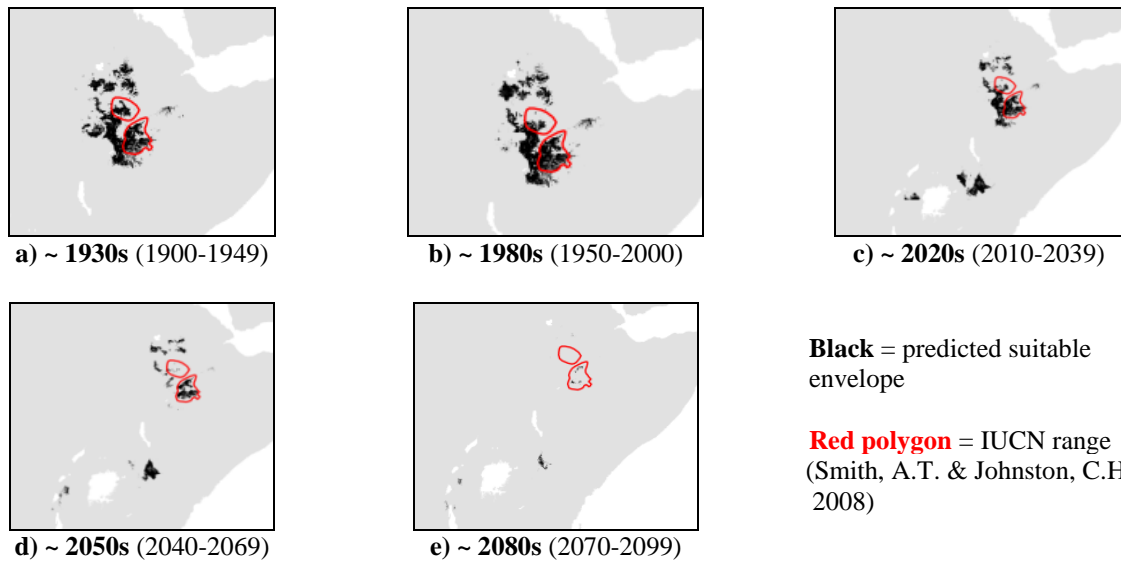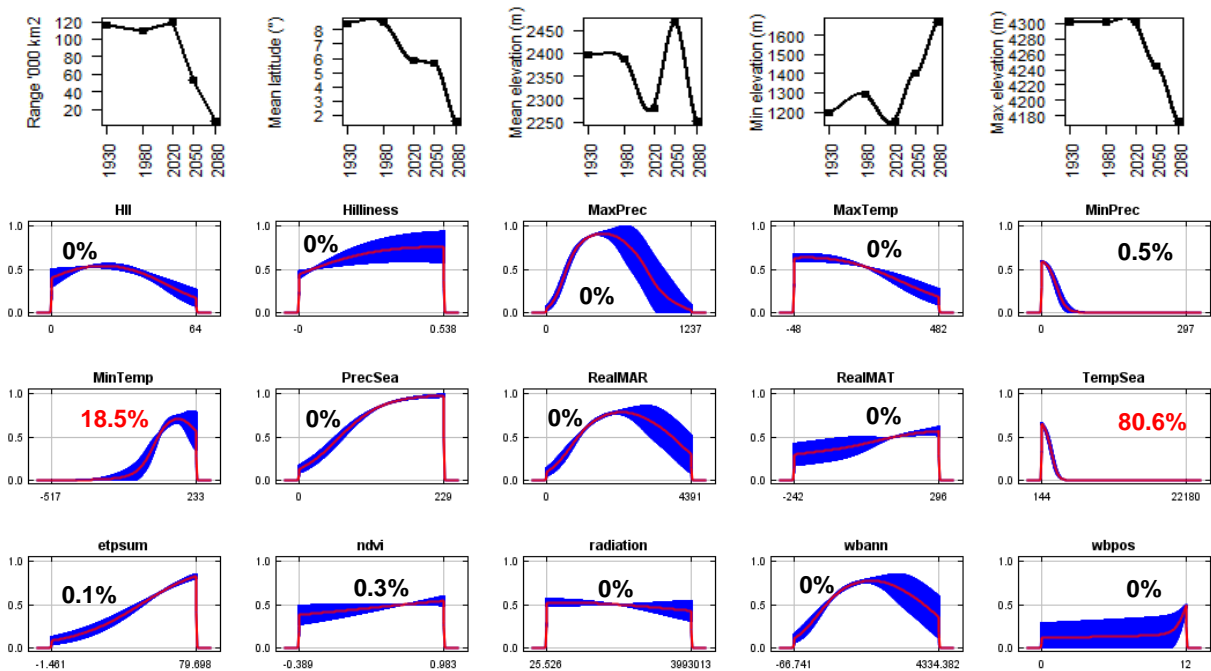



**#31 – Desert hare (*Lepus tibetanus*)**

*n* = 55

**Expert:** Chelmala Srinivasulu, Osmania University, India

**Expert evaluation:** Medium

**Data:** Only modern

**Envelope:** Climatic and habitat

**Dispersal distance:** 2.5km/year (Asian leporids, range 1-35)

**Status:** MODELLABLE; **Included in final analysis:** ✓

| Model evaluation metric |             |
|-------------------------|-------------|
| AUC                     | 0.92        |
| Omission rate           | 0.15        |
| Sensitivity             | 0.85        |
| Specificity             | 0.99        |
| Proportion correct      | 0.99        |
| <b>Kappa</b>            | <b>0.57</b> |
| True Skill Statistic    | 0.85        |

**Summary:** The Desert hare’s bioclimatic envelope is predicted to decrease by 50% with no latitudinal shift towards the Equator, but a mean increase in elevation of ~320m driven by an increase in maximum elevation. 95% of the permutation importance of the model was contributed to by minimum precipitation (54.5%), minimum temperature (19.3%), maximum precipitation (17.3%), annual evapotranspiration (2.8%) and human influence index (1.7%).

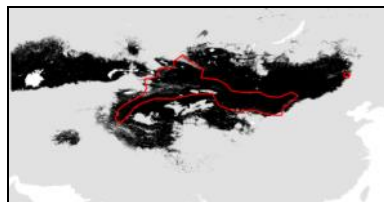

a) ~ 1930s (1900-1949)

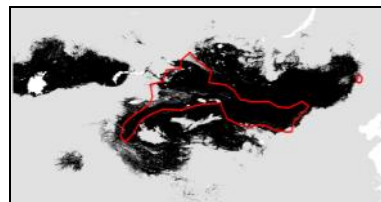

b) ~ 1980s (1950-2000)

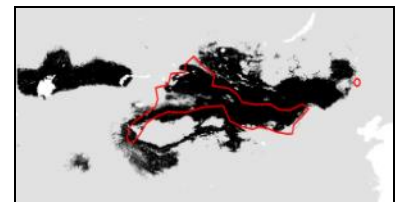

c) ~ 2020s (2010-2039)

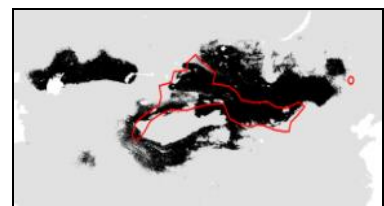

d) ~ 2050s (2040-2069)

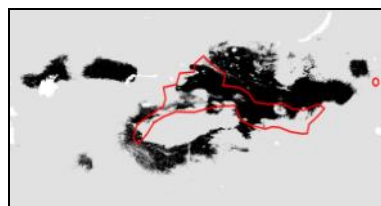

e) ~ 2080s (2070-2099)

**Black** = predicted suitable envelope

**Red polygon** = IUCN range (China Red List & Johnston, C.H. 2008)

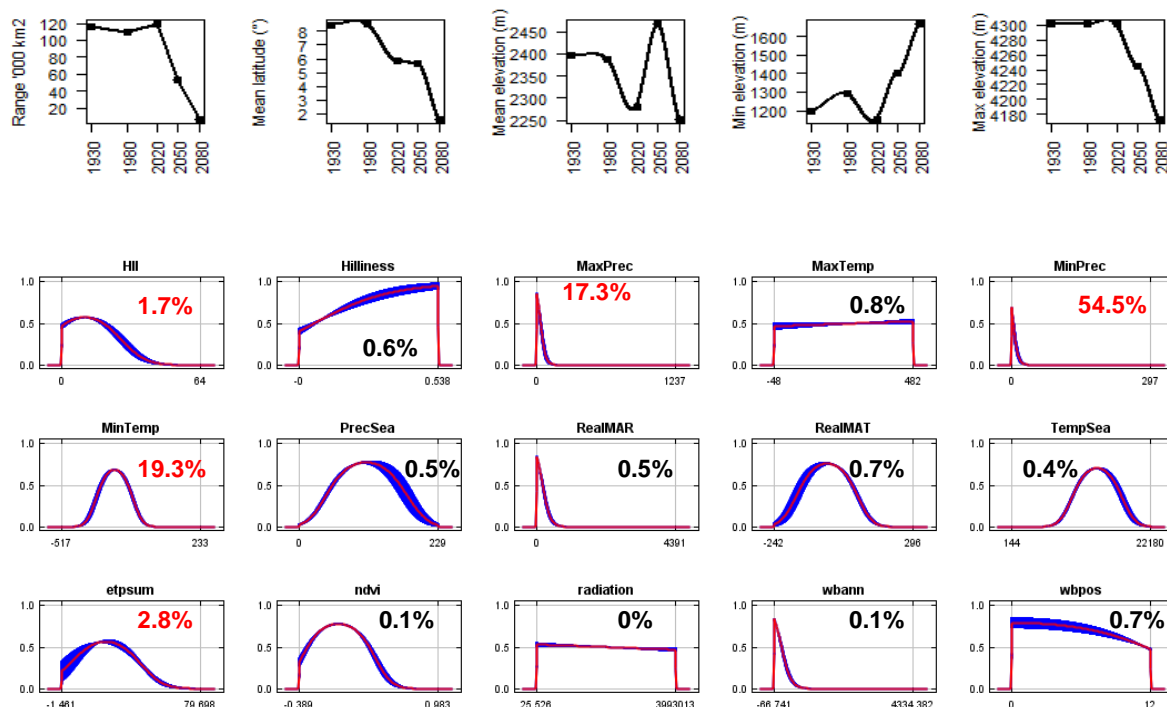



**#32 – Mountain hare (*Lepus timidus*) – Eurasian populations**

*n* = 2,460

**Expert:** Neil Reid, Queen’s University Belfast

**Expert evaluation:** Medium

**Data:** Only modern

**Envelope:** Climatic and habitat

**Dispersal distance:** 2km/year (Expert)

**Status:** MODELLABLE; **Included in final analysis:** ✓

| <b>Model evaluation metric</b> |             |
|--------------------------------|-------------|
| AUC                            | 0.91        |
| Omission rate                  | 0.08        |
| Sensitivity                    | 0.92        |
| Specificity                    | 0.90        |
| Proportion correct             | 0.91        |
| <b>Kappa</b>                   | <b>0.74</b> |
| True Skill Statistic           | 0.82        |

**Summary:** The Mountain hare’s bioclimatic envelope is predicted to decrease by 10% with a ~4° mean latitudinal polewards shift and a mean decrease in elevation of ~10m driven by a decrease in maximum elevation. 95% of the permutation importance of the model was contributed to by annual evapotranspiration (87.9%), temperature seasonality (3.9%), minimum precipitation (2.1%) and minimum temperature (1.6%).

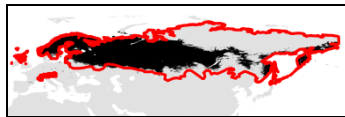

a) ~ 1930s (1900-1949)

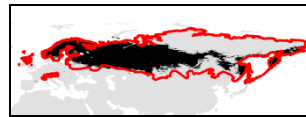

b) ~ 1980s (1950-2000)

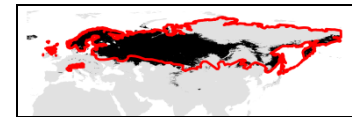

c) ~ 2020s (2010-2039)

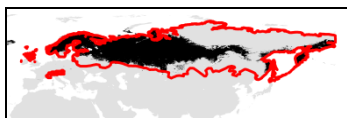

d) ~ 2050s (2040-2069)

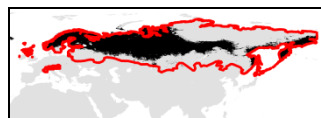

e) ~ 2080s (2070-2099)

**Black** = predicted suitable envelope

**Red polygon** = IUCN range (Smith, A.T. & Johnston, C.H. 2008)

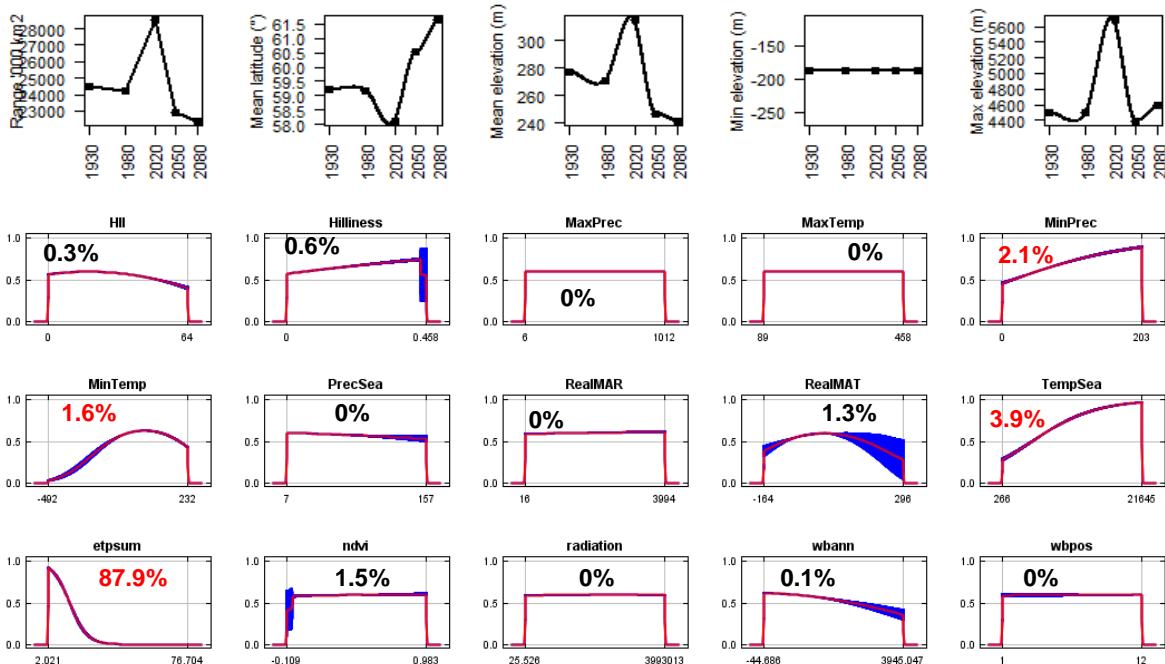

**#33 – Irish hare (*Lepus timidus hibernicus*)**

*n* = 706

**Expert:** Neil Reid, Queen’s University Belfast

**Expert evaluation:** Medium

**Data:** Only modern

**Envelope:** Climatic and habitat

**Dispersal distance:** 2km/year (Expert)

**Status:** MODELLABLE; **Included in final analysis:** ✓

| Model evaluation metric |             |
|-------------------------|-------------|
| AUC                     | 0.94        |
| Omission rate           | 0.08        |
| Sensitivity             | 0.92        |
| Specificity             | 0.97        |
| Proportion correct      | 0.96        |
| <b>Kappa</b>            | <b>0.75</b> |
| True Skill Statistic    | 0.88        |

**Summary:** The Irish hare’s bioclimatic envelope is predicted to decrease by 50% with a ~0.5° mean latitudinal polewards shift and a mean decrease in elevation of ~10m driven by a decrease in maximum elevation. 95% of the permutation importance of the model was contributed to by temperature seasonality (44.6%), annual evapotranspiration (41.5%), normalised difference vegetation index (6.4%), precipitation seasonality (3.6%) and maximum precipitation (2.5%).

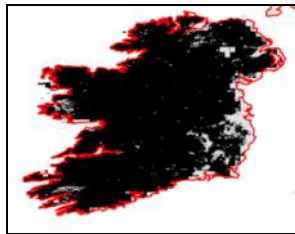

a) ~ 1930s (1900-1949)

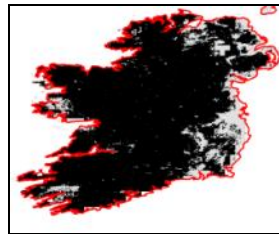

b) ~ 1980s (1950-2000)

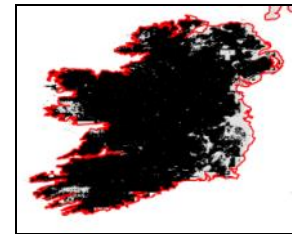

c) ~ 2020s (2010-2039)

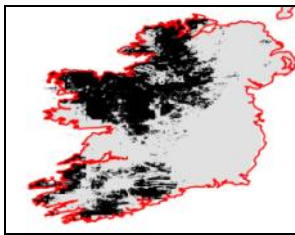

d) ~ 2050s (2040-2069)

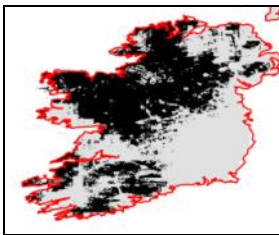

e) ~ 2080s (2070-2099)

**Black** = predicted suitable envelope

**Red polygon** = IUCN range (Smith, A.T. & Johnston, C.H. 2008)

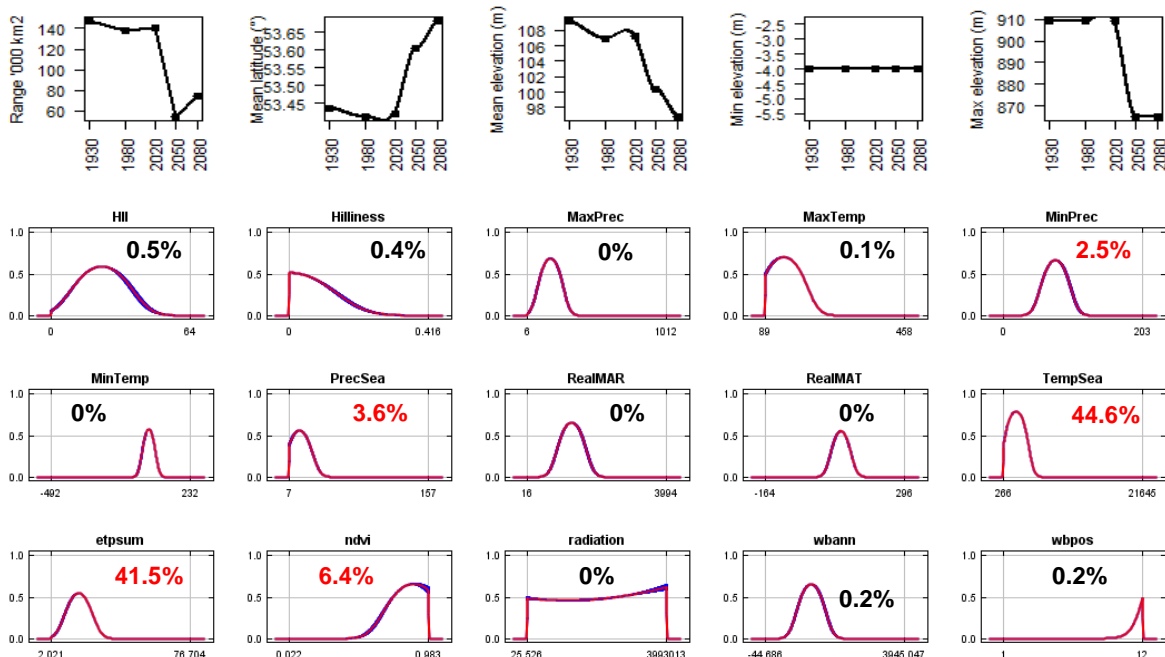

**#34 – Mountain hare (*Lepus timidus*)**

– Eurasian & Irish populations combined

$n = 3,166$

**Expert:** Neil Reid, Queen’s University Belfast

**Expert evaluation:** Medium

**Data:** Only modern

**Envelope:** Climatic and habitat

**Dispersal distance:** 2km/year (Expert)

**Status:** MODELLABLE; **Included in final analysis:** ✓

| Model evaluation metric |             |
|-------------------------|-------------|
| AUC                     | 0.92        |
| Omission rate           | 0.07        |
| Sensitivity             | 0.93        |
| Specificity             | 0.91        |
| Proportion correct      | 0.91        |
| <b>Kappa</b>            | <b>0.78</b> |
| True Skill Statistic    | 0.84        |

**Summary:** The Mountain hare’s bioclimatic envelope is predicted to decrease by 10% with a  $\sim 2^\circ$  mean latitudinal polewards shift and a mean decrease in elevation of  $\sim 40\text{m}$  driven by a decrease in maximum elevation. 95% of the permutation importance of the model was contributed to by annual evapotranspiration (87.6%), temperature seasonality (4.1%), minimum precipitation (2.1%) and minimum temperature (1.6%).

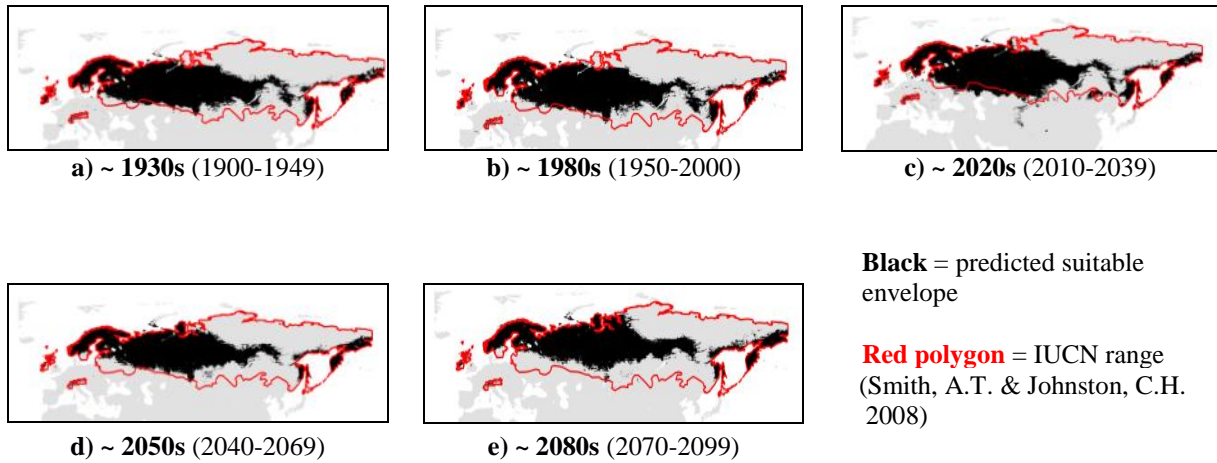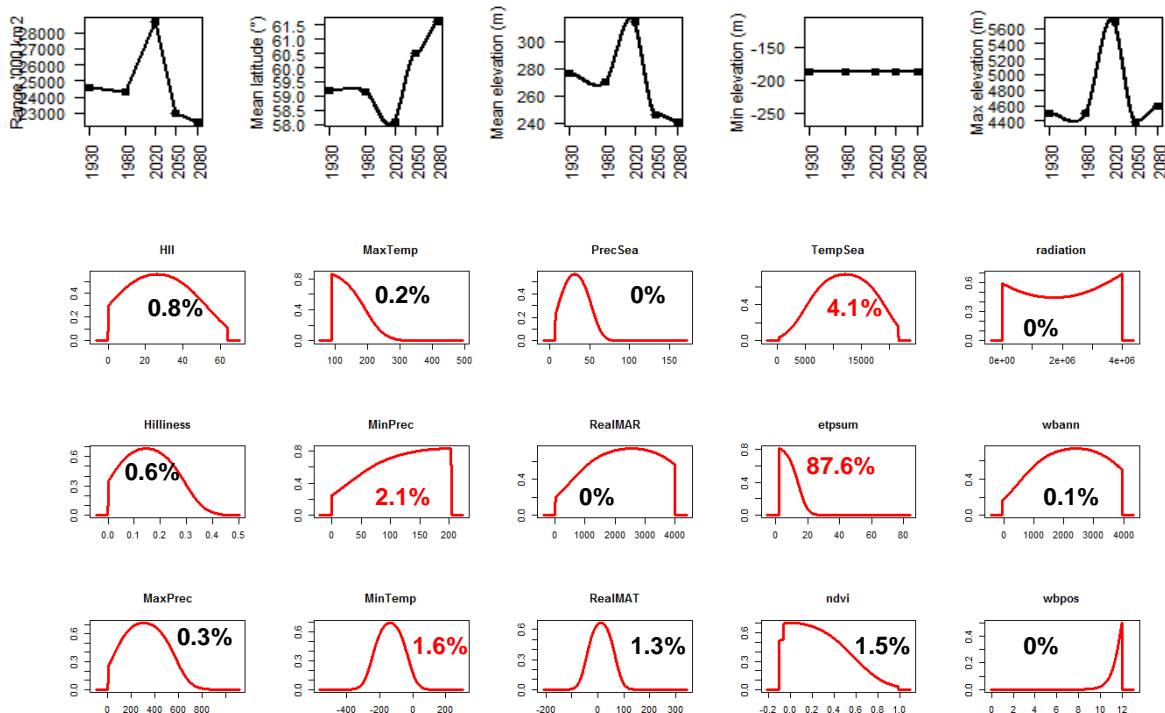

**#35 – Tolai hare (*Lepus tolai*)**

*n* = 316

**Expert:** Chelmala Srinivasulu, Osmania University, India

**Expert evaluation:** Medium

**Data:** Only modern

**Envelope:** Climatic and habitat

**Dispersal distance:** 2.5km/year (Asian leporids, range 1-35)

**Status:** MODELLABLE; **Included in final analysis:** √

| Model evaluation metric |             |
|-------------------------|-------------|
| AUC                     | 0.94        |
| Omission rate           | 0.11        |
| Sensitivity             | 0.89        |
| Specificity             | 0.99        |
| Proportion correct      | 0.98        |
| <b>Kappa</b>            | <b>0.76</b> |
| True Skill Statistic    | 0.88        |

**Summary:** The Tolai hare’s bioclimatic envelope is predicted to increase by 70% with a ~3° mean latitudinal polewards shift and a mean increase in elevation of ~280m driven by an increase in maximum elevation. 95% of the permutation importance of the model was contributed to by temperature seasonality (43.5%), maximum temperature (17.3%), mean annual temperature (15.2%), precipitation seasonality (9.6%), annual evapotranspiration (4.6%), mean annual precipitation (3.7%) and minimum precipitation (1.8%).

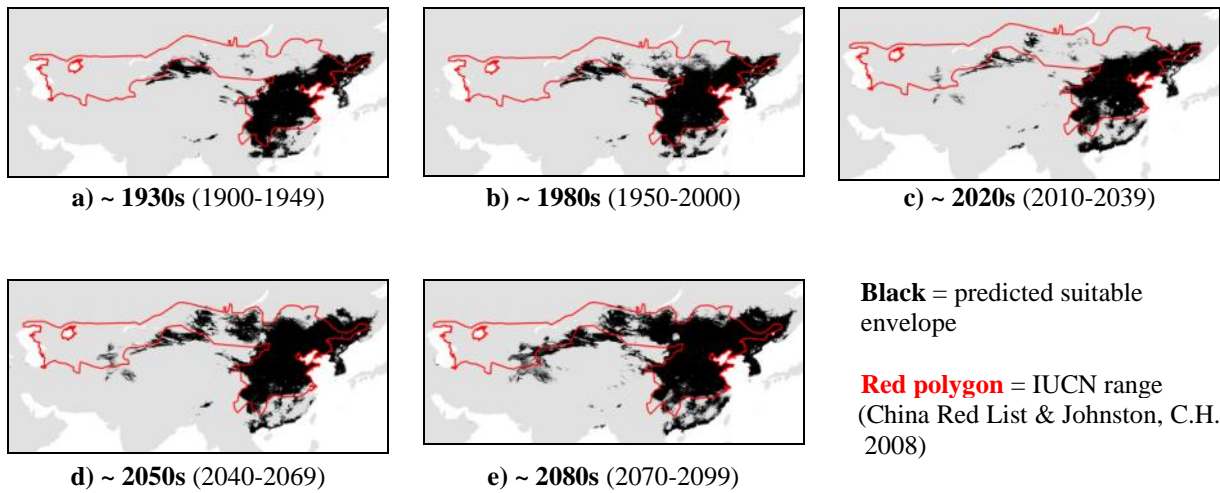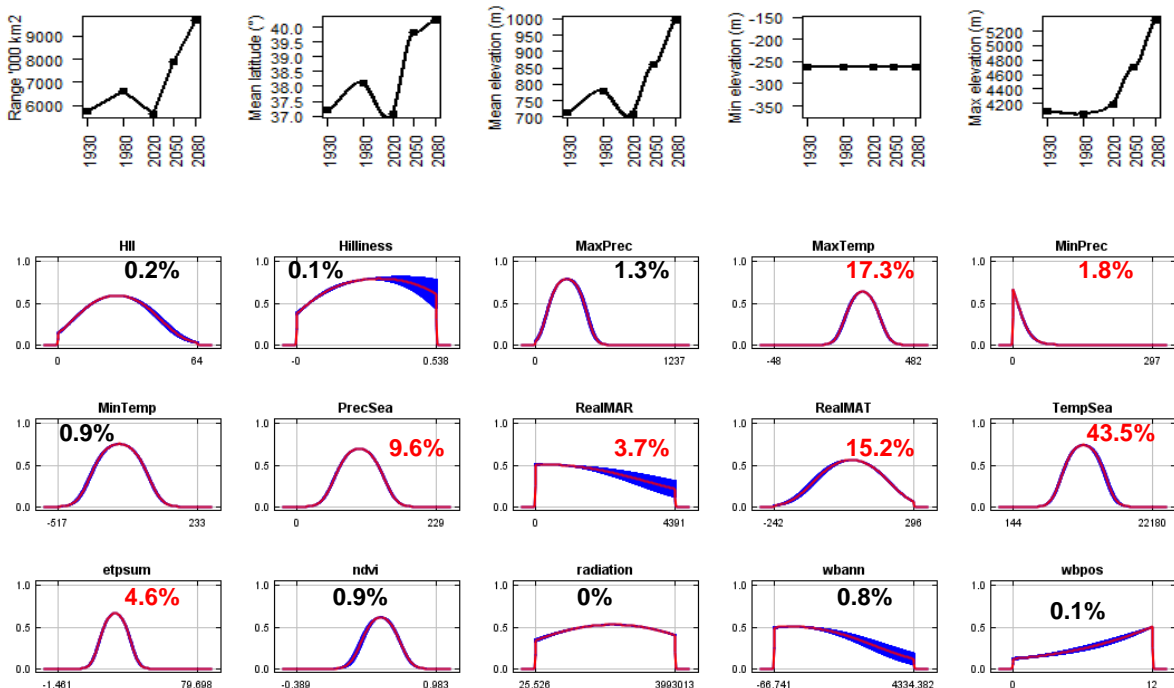

**#36 – White-tailed jackrabbit (*Lepus townsendii*)**

*n* = 275

**Expert:** Eric Waltari, City University of New York

**Expert evaluation:** Medium

**Data:** Only modern

**Envelope:** Climatic and habitat

**Dispersal distance:** 18.9km/year (N.Am. leporids, range 2-25)

**Status:** MODELLABLE; **Included in final analysis:** √

| Model evaluation metric |             |
|-------------------------|-------------|
| AUC                     | 0.94        |
| Omission rate           | 0.10        |
| Sensitivity             | 0.90        |
| Specificity             | 0.99        |
| Proportion correct      | 0.99        |
| <b>Kappa</b>            | <b>0.76</b> |
| True Skill Statistic    | 0.89        |

**Summary:** The White-tailed jackrabbit’s bioclimatic envelope is predicted to decrease by 10% with a ~4° mean latitudinal polewards shift and a mean increase in elevation of ~200m driven by an increase in minimum elevation. 95% of the permutation importance of the model was contributed to by mean annual temperature (62.5%), maximum temperature (28.4%), temperature seasonality (3.4%) and annual evapotranspiration (1.6%).

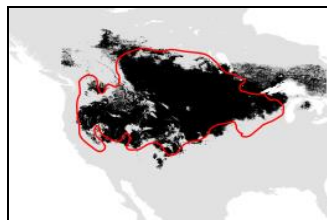

a) ~ 1930s (1900-1949)

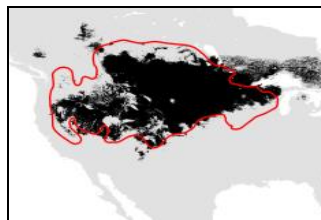

b) ~ 1980s (1950-2000)

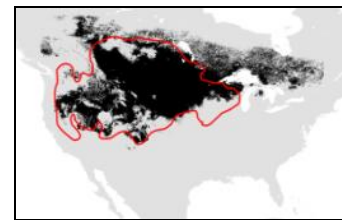

c) ~ 2020s (2010-2039)

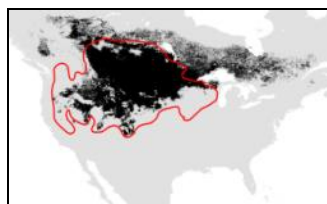

d) ~ 2050s (2040-2069)

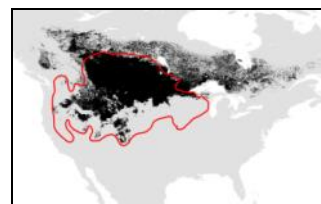

e) ~ 2080s (2070-2099)

**Black** = predicted suitable envelope

**Red polygon** = IUCN range (Smith, A.T. & Johnston, C.H. 2008)

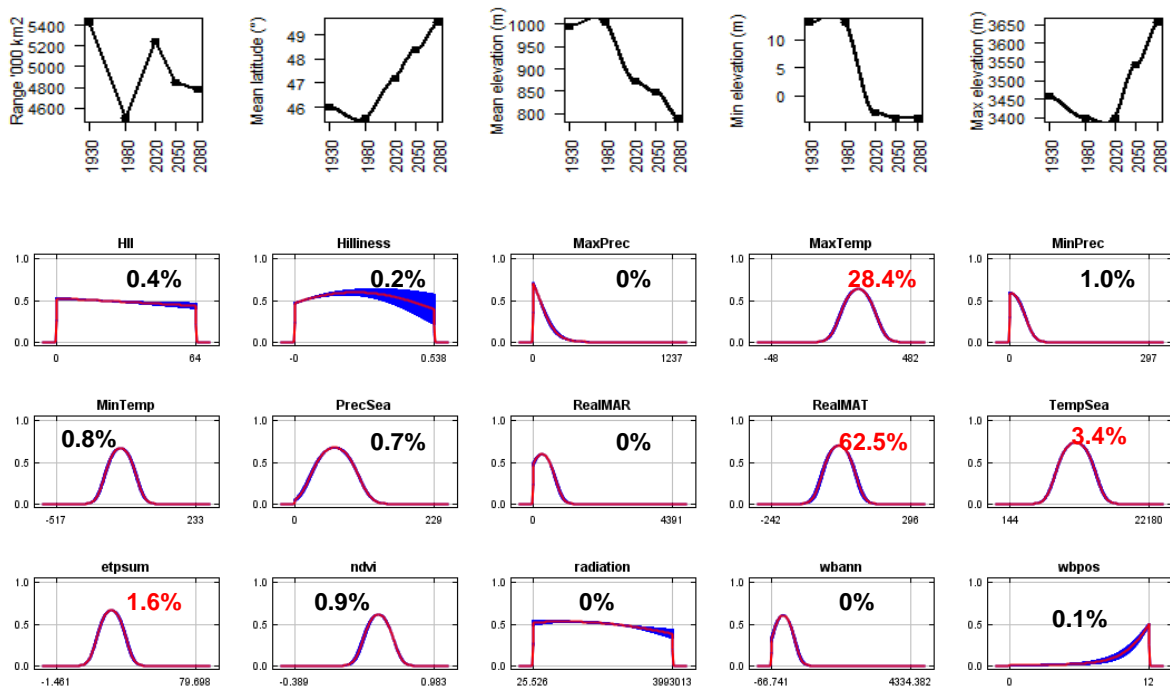



**#37 – Yarkand hare (*Lepus yarkandensis*)**

*n* = 49

**Expert:** Weihe Yang, Institute of Zoology, Chinese Academy of Sciences

**Expert evaluation:** Medium

**Data:** Modern and historic

**Envelope:** Climatic and habitat

**Dispersal distance:** 2km/year (Smith & Xie, 2008)

**Status:** MODELLABLE; **Included in final analysis:** √

| Model evaluation metric |             |
|-------------------------|-------------|
| AUC                     | 0.95        |
| Omission rate           | 0.10        |
| Sensitivity             | 0.90        |
| Specificity             | 0.99        |
| Proportion correct      | 0.99        |
| <b>Kappa</b>            | <b>0.74</b> |
| True Skill Statistic    | 0.90        |

**Summary:** The Yarkand hare’s bioclimatic envelope is predicted to decrease by 100% with a ~1° mean latitudinal shift towards the Equator and a mean increase in elevation of ~1000m driven by an increase in minimum elevation. 95% of the permutation importance of the model was contributed to by minimum precipitation (58.8%), maximum precipitation (16.3%), mean annual precipitation (11.9%) and minimum temperature (11.7%).

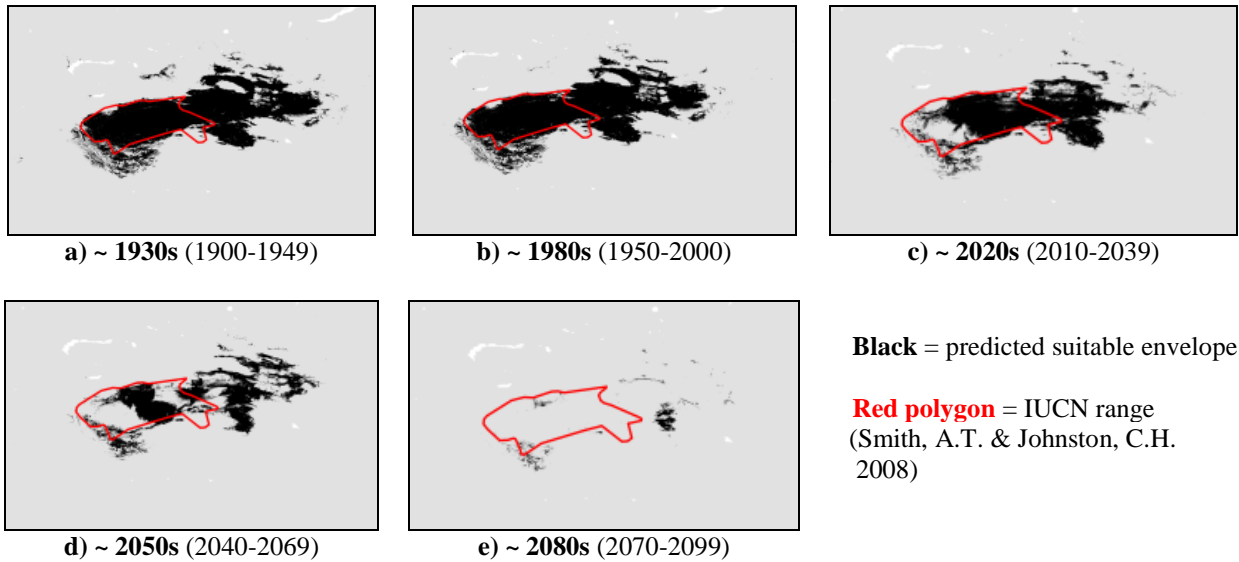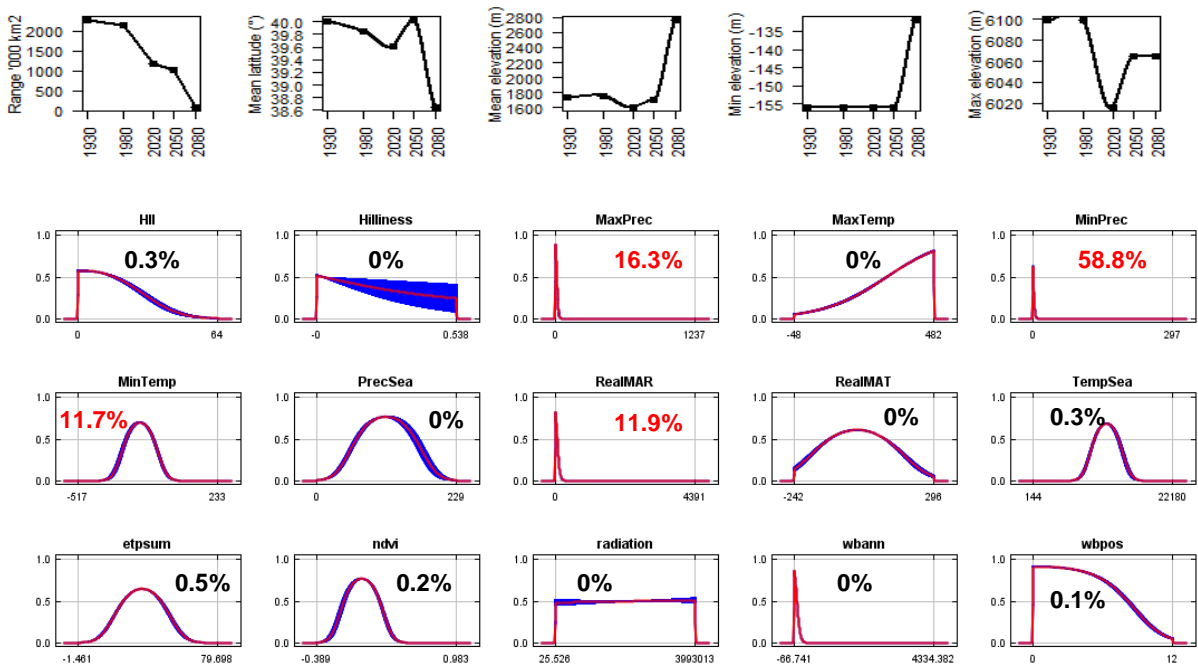



**#38 – Sumatran striped rabbit (*Nesolagus netscheri*)**

*n* = 11

**Expert:** Hariyo Wibisono, Wildlife Conservation Society, Indonesia

**Expert evaluation:** Poor

**Data:** Modern and historic

**Envelope:** Climatic and habitat

**Dispersal distance:** 0.01km/year (Expert)

**Status:** UNMODELLABLE; **Included in final analysis:** X

| Model evaluation metric |             |
|-------------------------|-------------|
| AUC                     | 0.99        |
| Omission rate           | 0.00        |
| Sensitivity             | 1.00        |
| Specificity             | 0.99        |
| Proportion correct      | 0.99        |
| <b>Kappa</b>            | <b>0.95</b> |
| True Skill Statistic    | 0.99        |

**Summary:** The Sumatran striped rabbit's bioclimatic envelope is predicted to decrease by 91% with a ~1° mean latitudinal shift towards the Equator and a mean increase in elevation of ~330m driven by an increase in minimum elevation. 95% of the permutation importance of the model was contributed to by temperature seasonality (99.3%).

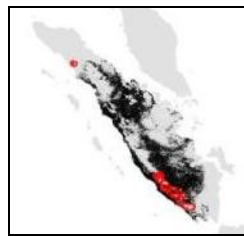

a) ~ 1930s (1900-1949)

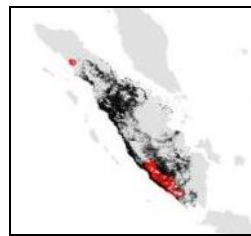

b) ~ 1980s (1950-2000)

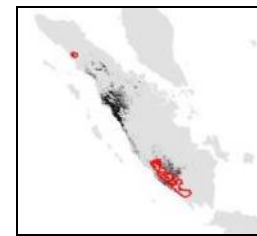

c) ~ 2020s (2010-2039)

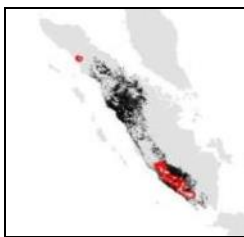

d) ~ 2050s (2040-2069)

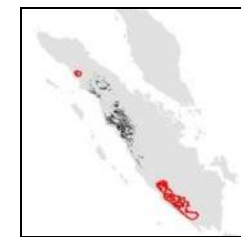

e) ~ 2080s (2070-2099)

**Black** = predicted suitable envelope

**Red polygon** = IUCN range (Meijaard, E. & Sugardjito, J. 2008)

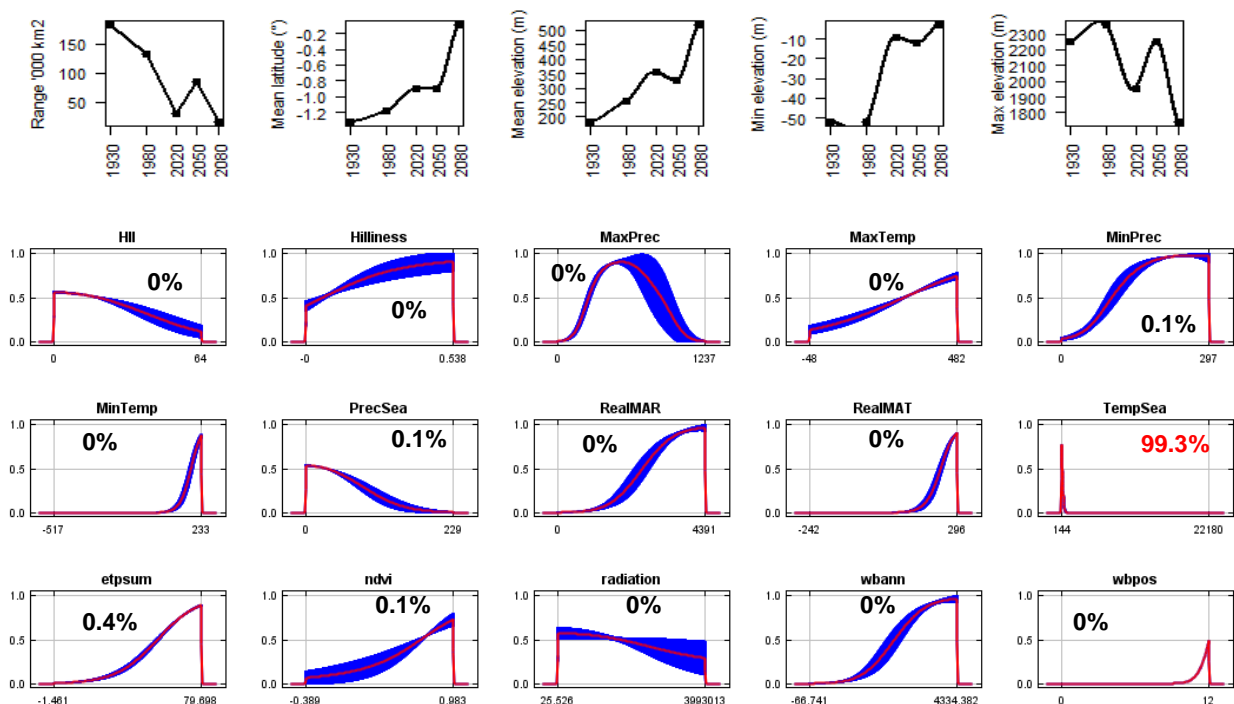

### #39 – Annamite striped rabbit (*Nesolagus timminsi*)

$n = 4$

**Expert:** Thomas Gray, WWF Greater Mekong & Andrew Tilker, University of Texas Austin

**Expert evaluation:** Poor

**Data:** Only modern

**Envelope:** Climatic and habitat

**Dispersal distance:** 10km/year (Expert)

**Status:** UNMODELLABLE; **Included in final analysis:** X

| Model evaluation metric |             |
|-------------------------|-------------|
| AUC                     | 0.99        |
| Omission rate           | 0.00        |
| Sensitivity             | 1.00        |
| Specificity             | 0.99        |
| Proportion correct      | 0.99        |
| <b>Kappa</b>            | <b>0.50</b> |
| True Skill Statistic    | 0.99        |

**Summary:** The Annamite striped rabbit's bioclimatic envelope is predicted to decrease by 1500% with a  $\sim 0.3^\circ$  mean latitudinal shift towards the Equator and a mean decrease in elevation of  $\sim 20$ m driven by an decrease in minimum elevation. 95% of the permutation importance of the model was contributed to by solar radiation (43.3%), minimum temperature (30.0%), mean annual temperature (14.1%), human influence index (6.4%) and annual evapotranspiration (2.3%).

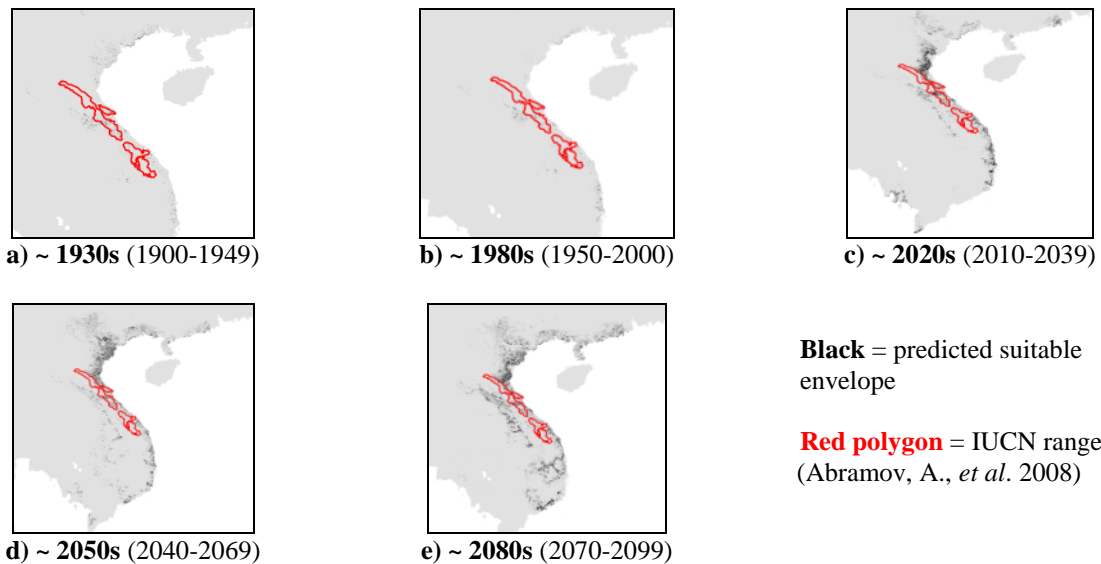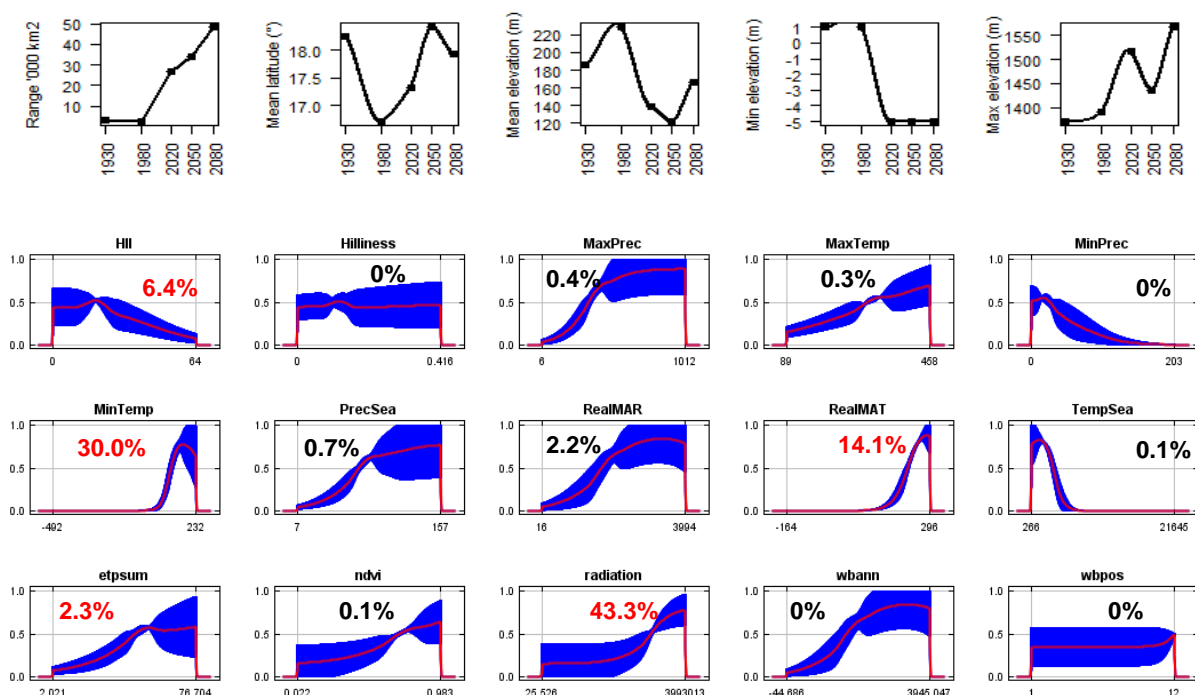

**#40 – Alpine pika (*Ochotona alpina*)**

*n* = 16

**Expert:** Sumiya Ganzorig, Hokkaido University

**Expert evaluation:** Poor

**Data:** Modern and historic

**Envelope:** Climatic and habitat

**Dispersal distance:** 10km/year (Similar ecology to *O.pallasi*)

**Status:** UNMODELLABLE; **Included in final analysis:** X

| Model evaluation metric |             |
|-------------------------|-------------|
| AUC                     | 0.99        |
| Omission rate           | 0.00        |
| Sensitivity             | 1.00        |
| Specificity             | 0.99        |
| Proportion correct      | 0.99        |
| <b>Kappa</b>            | <b>0.29</b> |
| True Skill Statistic    | 0.99        |

**Summary:** The Alpine pika’s bioclimatic envelope is predicted to decrease by 10% with a ~4° mean latitudinal polewards shift and a mean decrease in elevation of ~80m. 95% of the permutation importance of the model was contributed to by minimum precipitation (50.1%), mean annual temperature (31.1%), number of months with a positive water balance (10.9%), minimum temperature (2.3%) and annual evapotranspiration (1.3%).

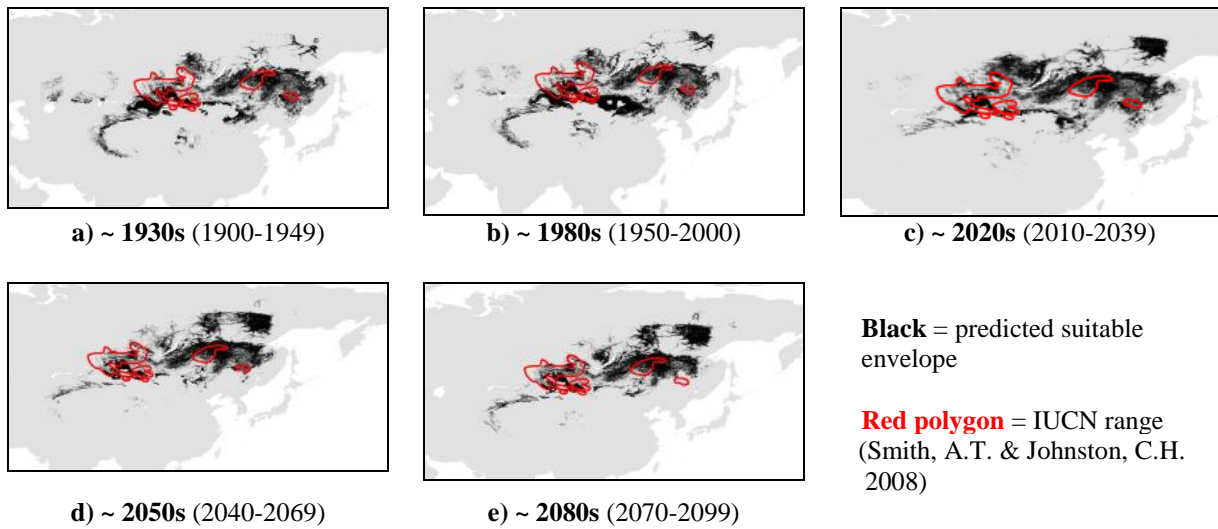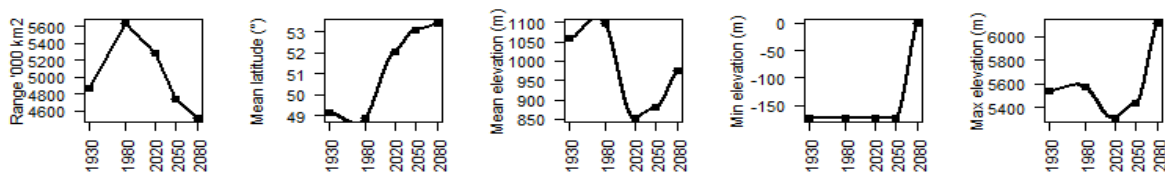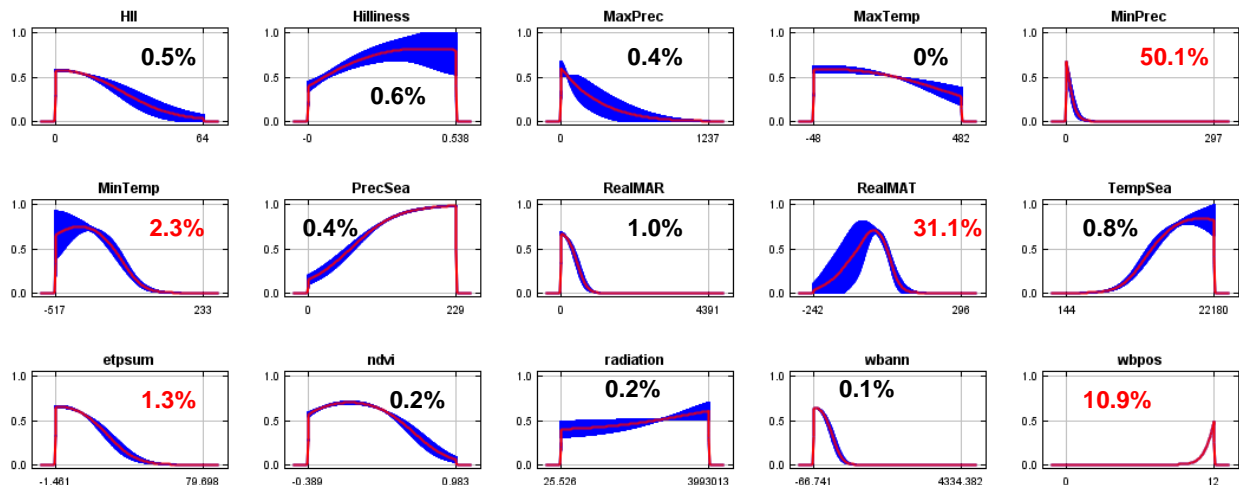

**#41 – Silver pika (*Ochotona argentata*)**

*n* = 4

**Expert:** Andrew Smith, Arizona State University

**Expert evaluation:** Poor

**Data:** Only modern

**Envelope:** Climatic and habitat

**Dispersal distance:** 3km/year (Asian pikas, range 1-15)

**Status:** UNMODELLABLE; **Included in final analysis:** X

| Model evaluation metric |             |
|-------------------------|-------------|
| AUC                     | 1.00        |
| Omission rate           | 0.00        |
| Sensitivity             | 1.00        |
| Specificity             | 1.00        |
| Proportion correct      | 1.00        |
| <b>Kappa</b>            | <b>1.00</b> |
| True Skill Statistic    | 1.00        |

**Summary:** The Silver pika’s bioclimatic envelope is predicted to decrease by 80% with a ~4° mean latitudinal polewards shift and a mean increase in elevation of ~360m driven by an increase in minimum elevation. 95% of the permutation importance of the model was contributed to by minimum precipitation (62.7%), human influence index (17.1%), mean annual precipitation (8.6%), minimum temperature (5.4%) and annual evapotranspiration (1.8%).

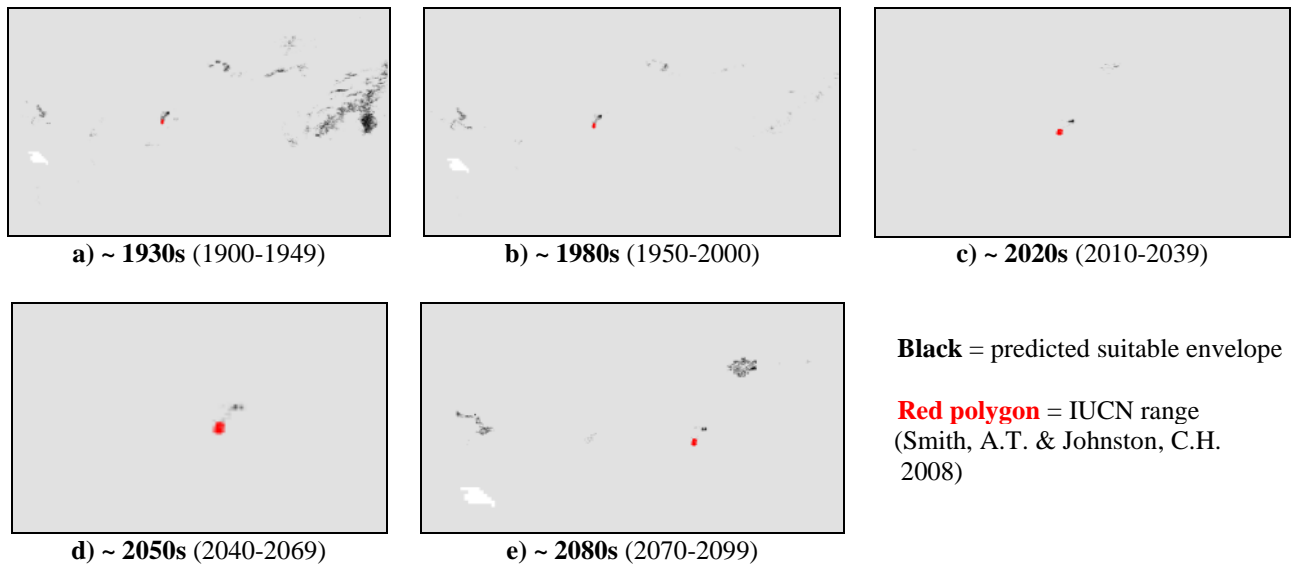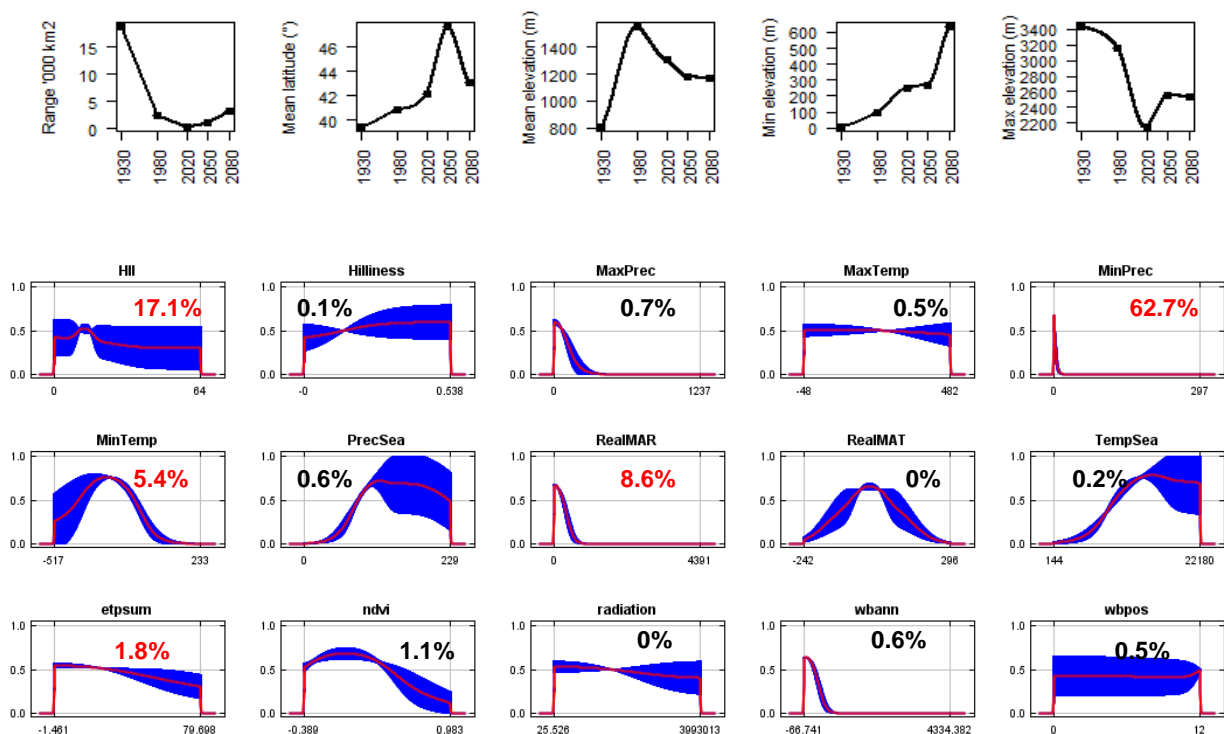

**#42 – Gansu pika (*Ochotona cansus*)**

*n* = 38

**Expert:** Andrew Smith, Arizona State University

**Expert evaluation:** Medium

**Data:** Modern and historic

**Envelope:** Climatic and habitat

**Dispersal distance:** 1.5km/year (Similar ecology to *O.roylei*)

**Status:** MODELLABLE; **Included in final analysis:** √

| <b>Model evaluation metric</b> |             |
|--------------------------------|-------------|
| AUC                            | 0.95        |
| Omission rate                  | 0.11        |
| Sensitivity                    | 0.89        |
| Specificity                    | 0.99        |
| Proportion correct             | 0.99        |
| <b>Kappa</b>                   | <b>0.61</b> |
| True Skill Statistic           | 0.89        |

**Summary:** The Gansu pika’s bioclimatic envelope is predicted to decrease by 60% with a ~0.4° mean latitudinal shift towards the Equator and a mean increase in elevation of ~230m driven by an increase in minimum elevation. 95% of the permutation importance of the model was contributed to by minimum precipitation (89.8%) and minimum temperature (6.9%).

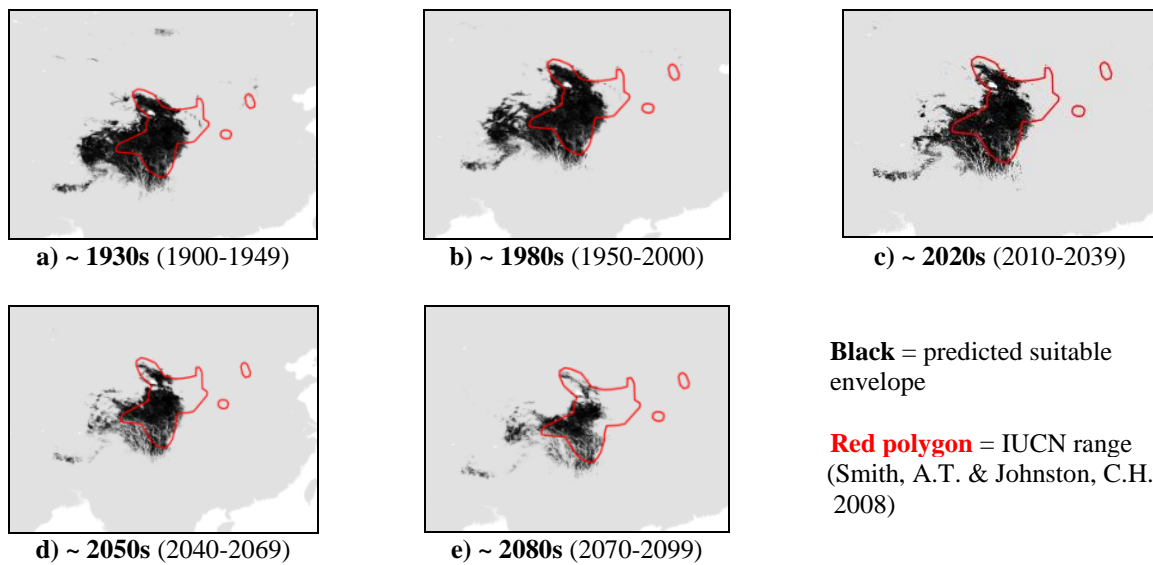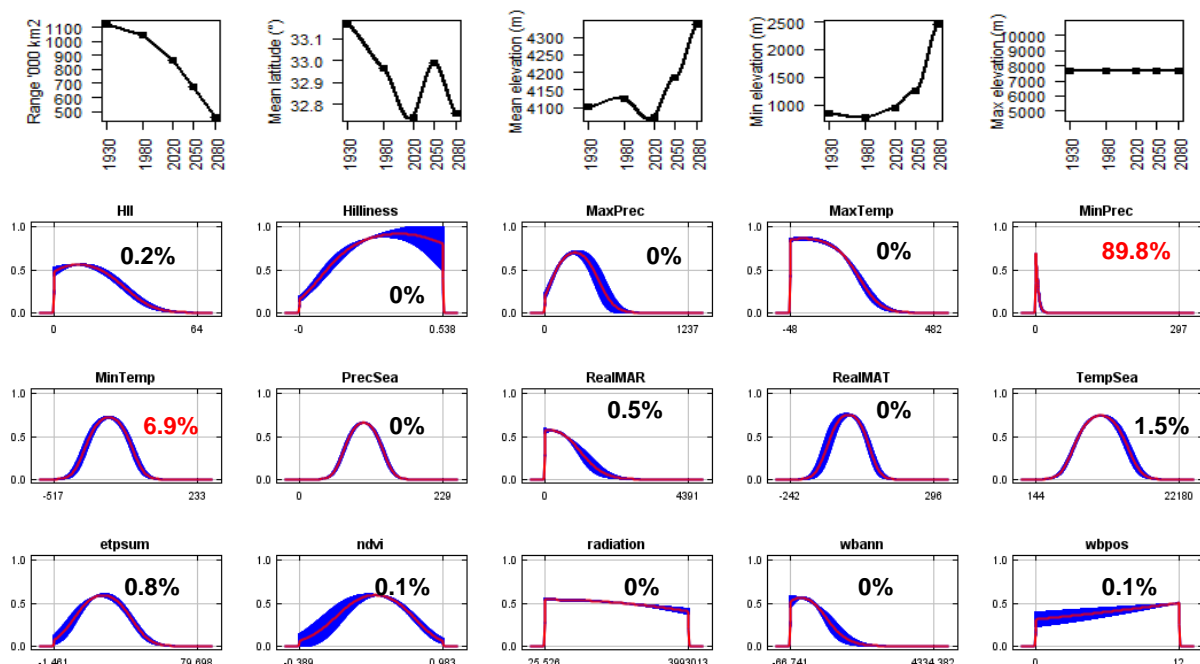

### #43 – Collared pika (*Ochotona collaris*)

*n* = 193

**Expert:** Hayley Lanier, University of Michigan & David Hik, University of Alberta

**Expert evaluation:** Poor

**Data:** Modern and historic

**Envelope:** Climatic and habitat

**Dispersal distance:** 1km/year (Expert)

**Status:** UNMODELLABLE; **Included in final analysis:** X

| Model evaluation metric |             |
|-------------------------|-------------|
| AUC                     | 0.95        |
| Omission rate           | 0.10        |
| Sensitivity             | 0.90        |
| Specificity             | 0.99        |
| Proportion correct      | 0.99        |
| <b>Kappa</b>            | <b>0.86</b> |
| True Skill Statistic    | 0.90        |

**Summary:** The Collared pika's bioclimatic envelope is predicted to increase by 20% with a ~2° mean latitudinal polewards shift and a mean decrease in elevation of ~140m. 95% of the permutation importance of the model was contributed to by annual evapotranspiration (86.7%), mean annual temperature (3.3%), normalised difference vegetation index (3.2%) and maximum temperature (2.0%).

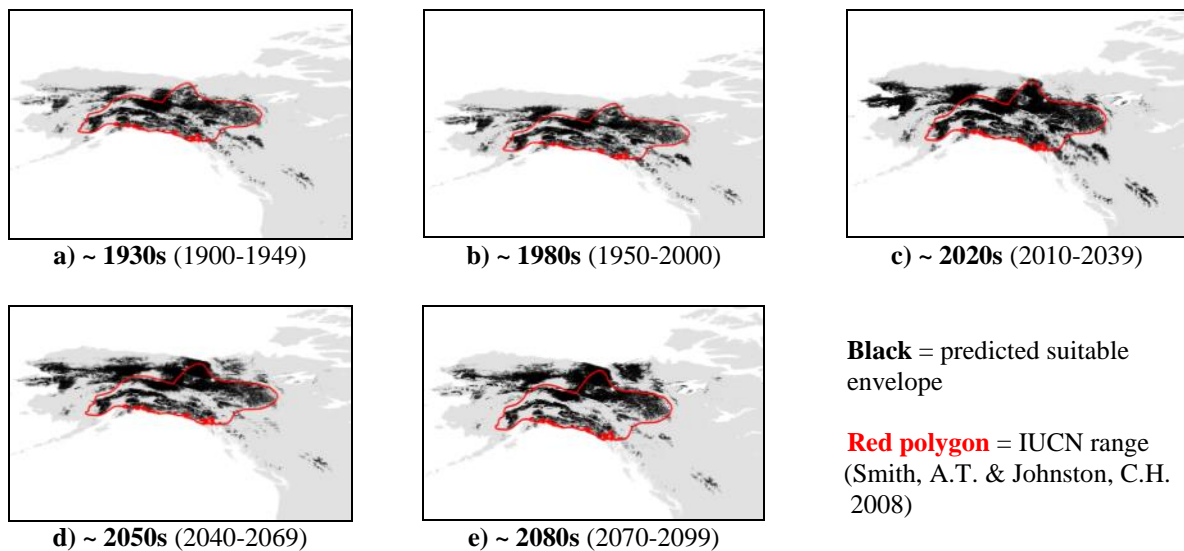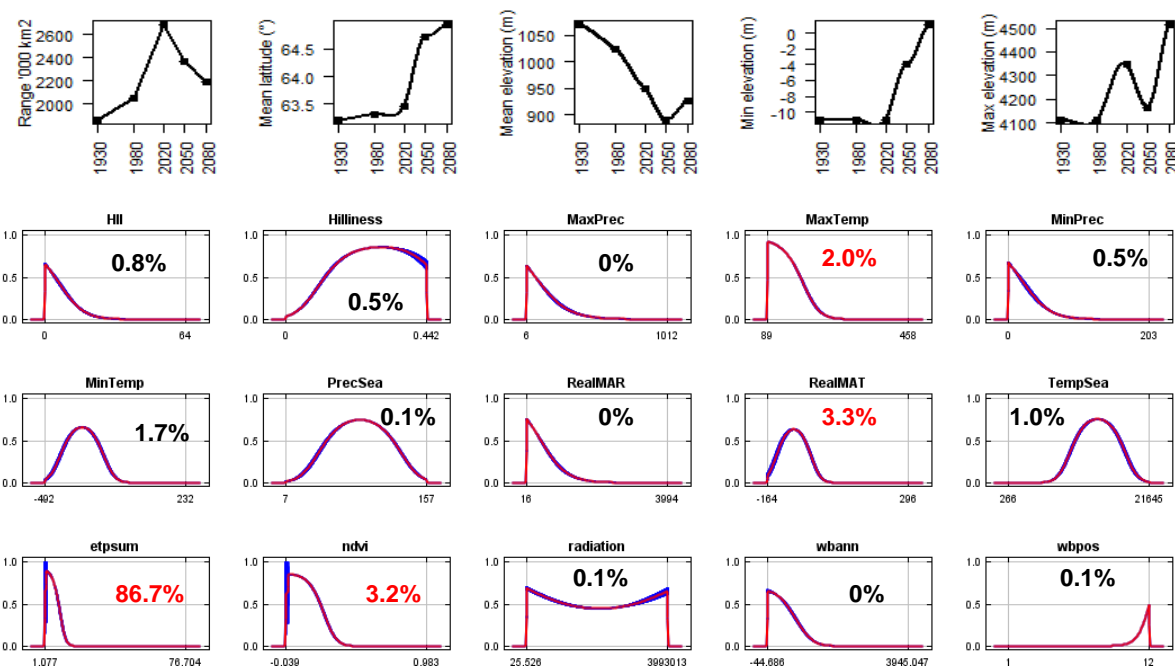



**#44 – Plateau pika (*Ochotona curzoniae*)**

*n* = 131

**Expert:** Andrew Smith, Arizona State University

**Expert evaluation:** Good

**Data:** Only modern

**Envelope:** Climatic and habitat

**Dispersal distance:** 0.1km/year (Expert)

**Status:** MODELLABLE; **Included in final analysis:** ✓

| Model evaluation metric |             |
|-------------------------|-------------|
| AUC                     | 0.94        |
| Omission rate           | 0.11        |
| Sensitivity             | 0.89        |
| Specificity             | 0.99        |
| Proportion correct      | 0.99        |
| <b>Kappa</b>            | <b>0.76</b> |
| True Skill Statistic    | 0.88        |

**Summary:** The Plateau pika’s bioclimatic envelope is predicted to decrease by 30% with a ~1° mean latitudinal shift towards the Equator and a mean increase in elevation of ~700m driven by an increase in minimum and maximum elevation. 95% of the permutation importance of the model was contributed to by minimum precipitation (48.0%), maximum temperature (42.0%) and annual evapotranspiration (6.8%).

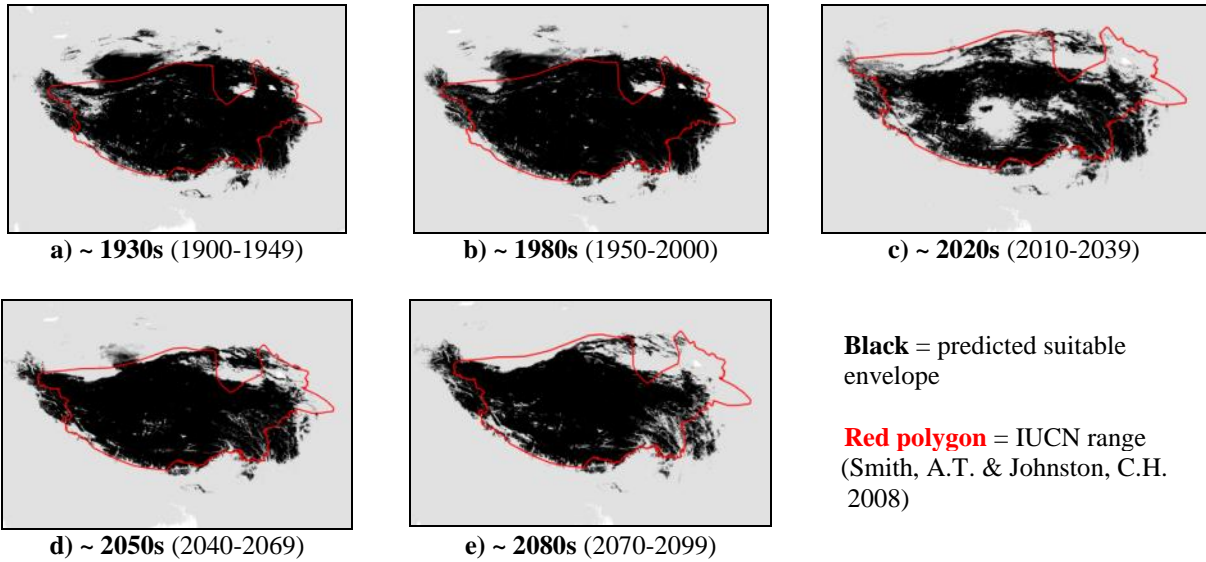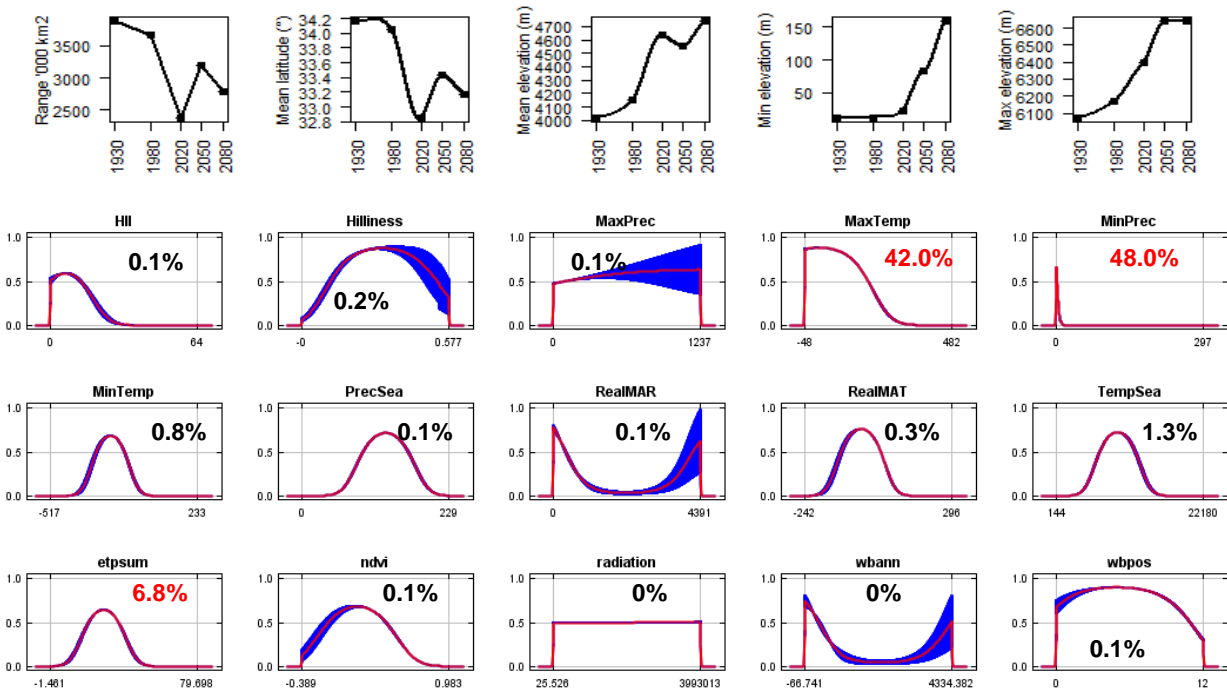

**#45 – Daurian pika (*Ochotona dauurica*)**

*n* = 131

**Expert:** Andrew Smith, Arizona State University

**Expert evaluation:** Medium

**Data:** Only modern

**Envelope:** Climatic and habitat

**Dispersal distance:** 0.1km/year (Similar ecology to *O.curzoniae*)

**Status:** MODELLABLE; **Included in final analysis:** √

| Model evaluation metric |             |
|-------------------------|-------------|
| AUC                     | 0.95        |
| Omission rate           | 0.10        |
| Sensitivity             | 0.90        |
| Specificity             | 0.99        |
| Proportion correct      | 0.99        |
| <b>Kappa</b>            | <b>0.66</b> |
| True Skill Statistic    | 0.89        |

**Summary:** The Daurian pika’s bioclimatic envelope is predicted to decrease by 25% with a ~1° mean latitudinal polewards shift and a mean decrease in elevation of ~60m. 95% of the permutation importance of the model was contributed to by minimum precipitation (92.3%) and number of months with a positive water balance (2.7%).

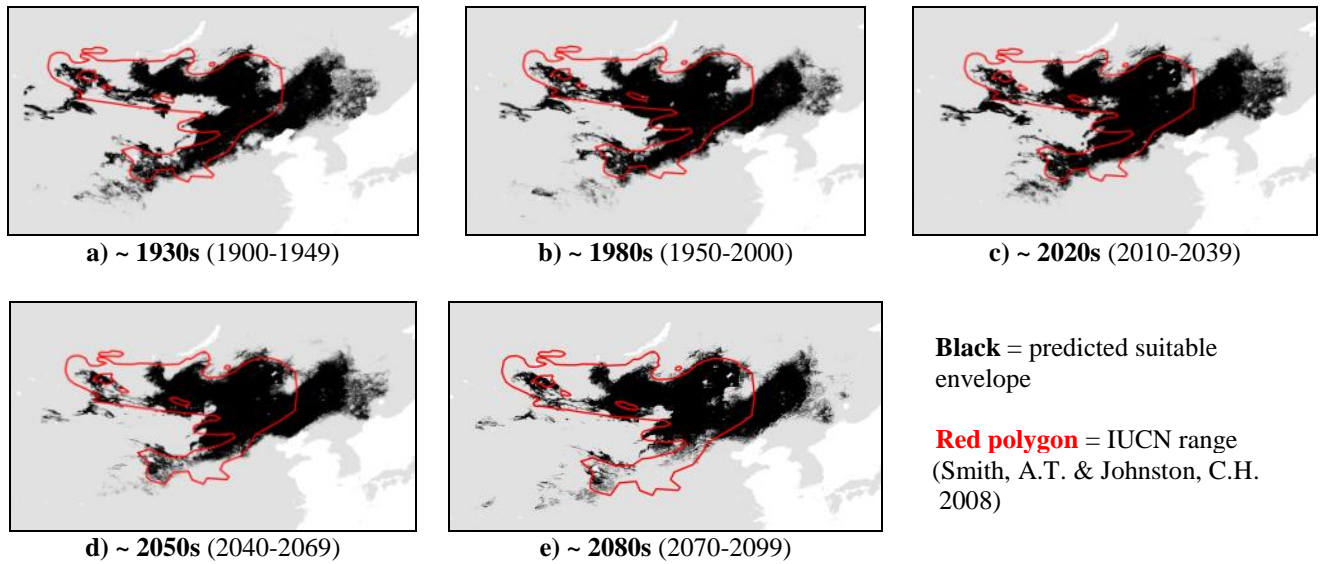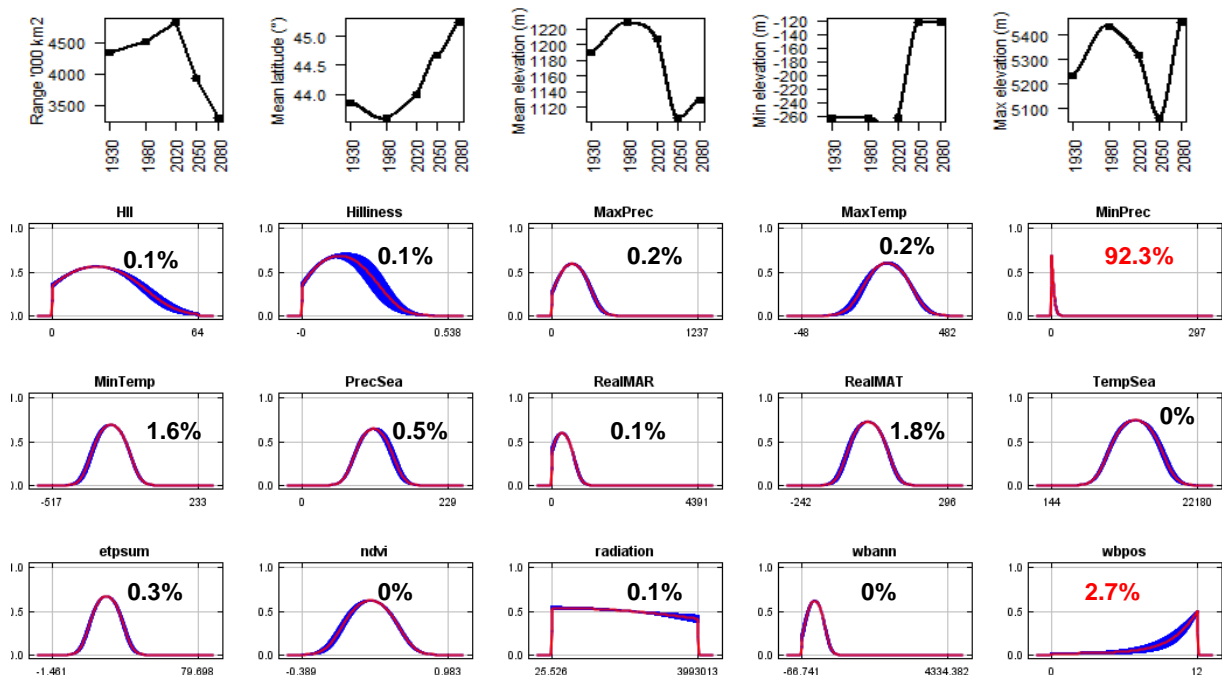

**#46 – Chinese red pika (*Ochotona erythrotis*)**

*n* = 39

**Expert:** Andrew Smith, Arizona State University

**Expert evaluation:** Poor

**Data:** Modern and historic

**Envelope:** Climatic and habitat

**Dispersal distance:** 3km/year (Asian pikas, range 1-15)

**Status:** UNMODELLABLE; **Included in final analysis:** X

| <b>Model evaluation metric</b> |             |
|--------------------------------|-------------|
| AUC                            | 0.95        |
| Omission rate                  | 0.10        |
| Sensitivity                    | 0.90        |
| Specificity                    | 0.99        |
| Proportion correct             | 0.99        |
| <b>Kappa</b>                   | <b>0.53</b> |
| True Skill Statistic           | 0.89        |

**Summary:** The Chinese red pika’s bioclimatic envelope is predicted to decrease by 20% with a ~3° mean latitudinal polewards shift and a mean decrease in elevation of ~2400m driven by a decrease in minimum elevation. 95% of the permutation importance of the model was contributed to by minimum precipitation (87.2%), minimum temperature (7.2%) and mean annual temperature (2.9%).

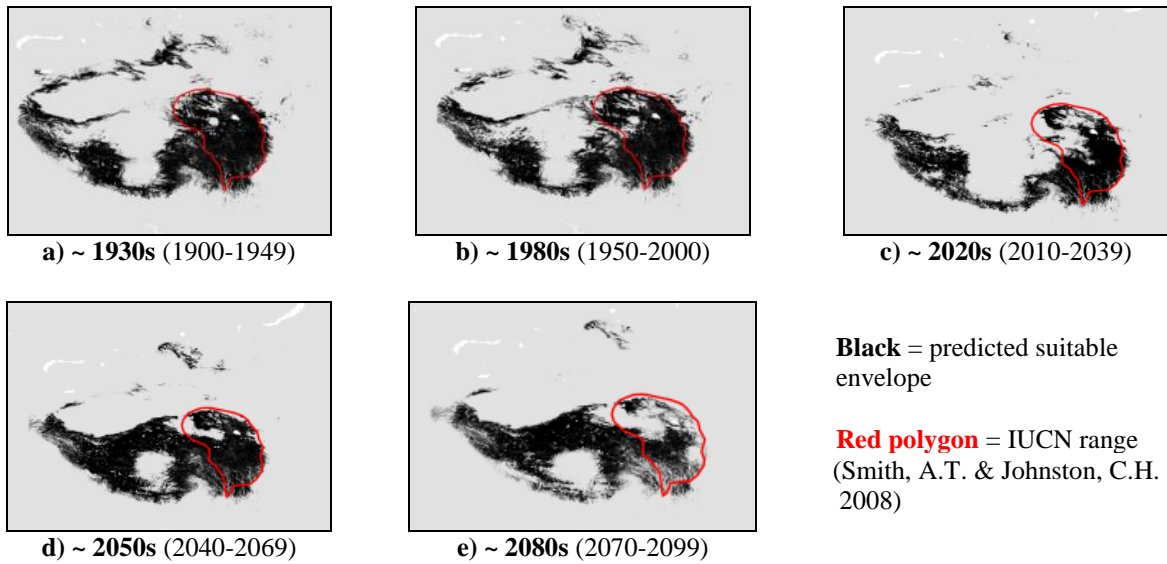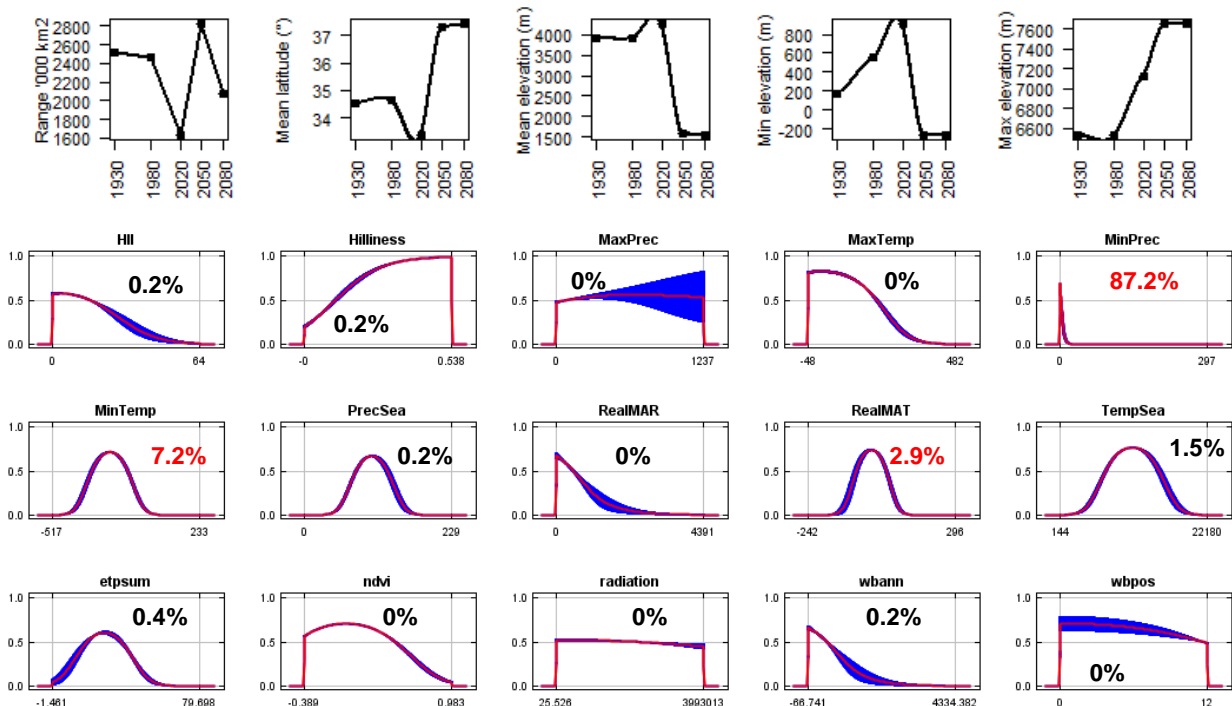

**#47 – Forrest’s pika (*Ochotona forresti*)**

*n* = 9

**Expert:** Andrew Smith, Arizona State University

**Expert evaluation:** Poor

**Data:** Only modern

**Envelope:** Climatic and habitat

**Dispersal distance:** 3km/year (Asian pikas, range 1-15)

**Status:** UNMODELLABLE; **Included in final analysis:** X

| Model evaluation metric |             |
|-------------------------|-------------|
| AUC                     | 0.95        |
| Omission rate           | 0.10        |
| Sensitivity             | 0.90        |
| Specificity             | 0.99        |
| Proportion correct      | 0.99        |
| <b>Kappa</b>            | <b>0.53</b> |
| True Skill Statistic    | 0.89        |

**Summary:** The Forrest’s pika’s bioclimatic envelope is predicted to decrease by 40% with a ~1° mean latitudinal polewards shift and a mean increase in elevation of ~600m driven by an increase in maximum elevation. 95% of the permutation importance of the model was contributed to by minimum precipitation (36.8%), temperature seasonality (20.6%), normalised difference vegetation index (12.1%), maximum temperature (9.3%), precipitation seasonality (7.6%), human influence index (6.2%) and surface roughness index (4.2%).

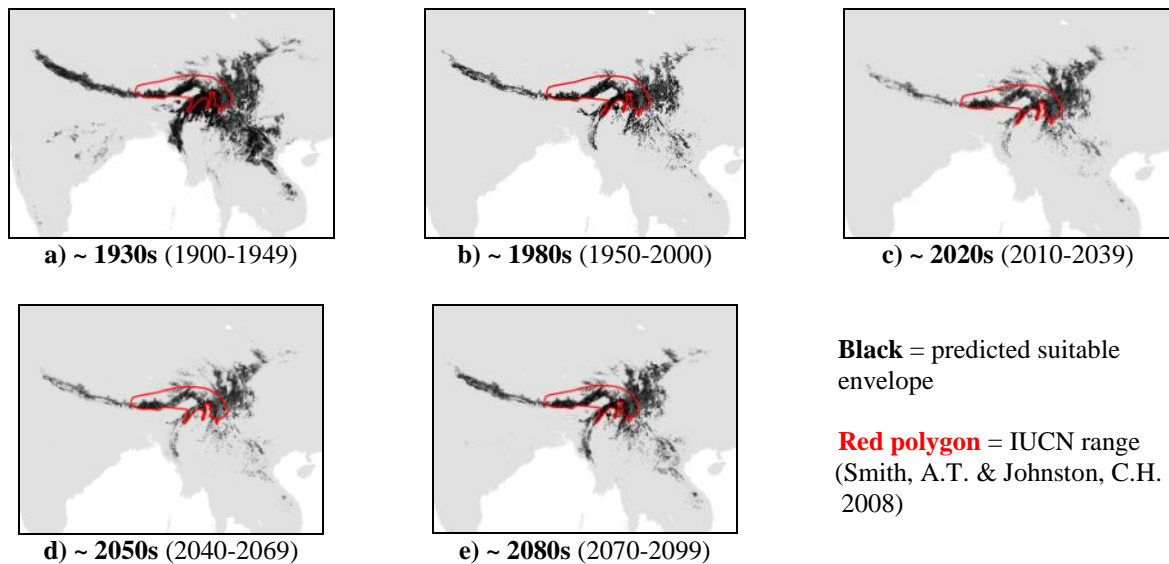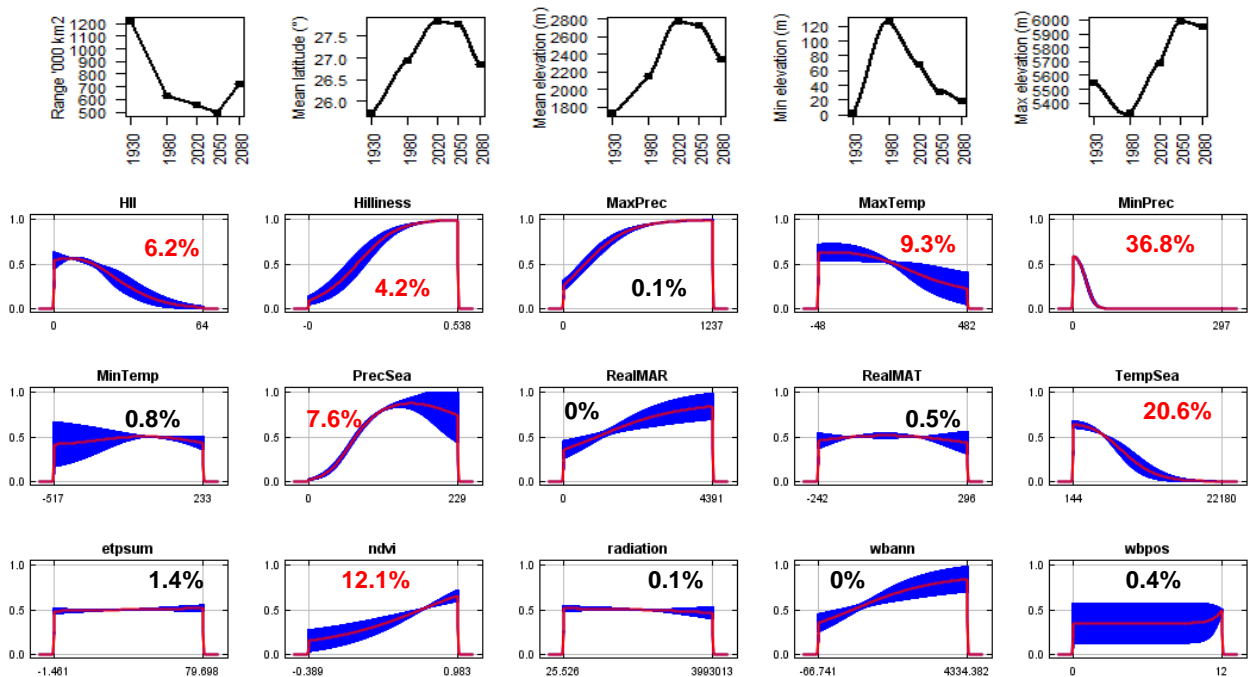

## #48 – Glover’s pika (*Ochotona gloveri*)

$n = 22$

**Expert:** Andrew Smith, Arizona State University

**Expert evaluation:** Medium

**Data:** Only modern

**Envelope:** Climatic and habitat

**Dispersal distance:** 3km/year (Asian pikas, range 1-15)

**Status:** MODELLABLE; **Included in final analysis:**  $\checkmark$

| Model evaluation metric |             |
|-------------------------|-------------|
| AUC                     | 0.99        |
| Omission rate           | 0.00        |
| Sensitivity             | 1.00        |
| Specificity             | 0.99        |
| Proportion correct      | 0.99        |
| <b>Kappa</b>            | <b>0.65</b> |
| True Skill Statistic    | 0.99        |

**Summary:** The Glover’s pika’s bioclimatic envelope is predicted to decrease by 50% with a  $\sim 0.5^\circ$  mean latitudinal polewards shift and a mean increase in elevation of  $\sim 270\text{m}$  driven by an increase in minimum and maximum elevation. 95% of the permutation importance of the model was contributed to by minimum precipitation (46.3%), minimum temperature (28.8%), mean annual temperature (12.7%), human influence index (3.8%), temperature seasonality (3.1%) and precipitation seasonality (1.8%).

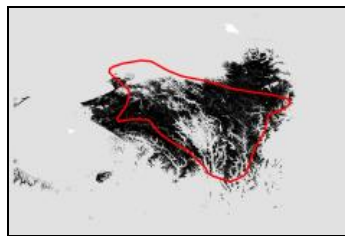

a) ~ 1930s (1900-1949)

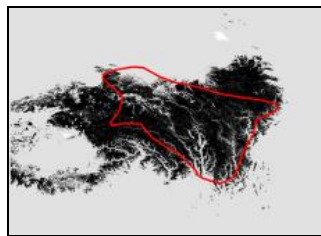

b) ~ 1980s (1950-2000)

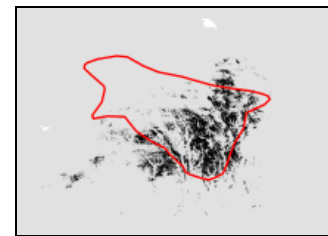

c) ~ 2020s (2010-2039)

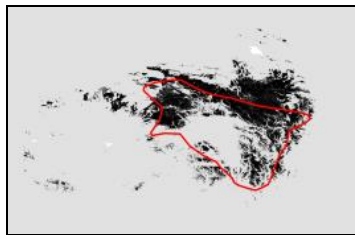

d) ~ 2050s (2040-2069)

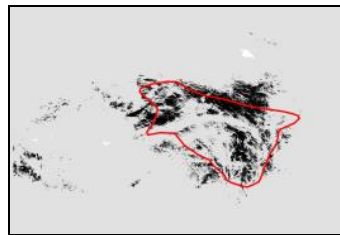

e) ~ 2080s (2070-2099)

**Black** = predicted suitable envelope

**Red polygon** = IUCN range (Smith, A.T. & Johnston, C.H. 2008)

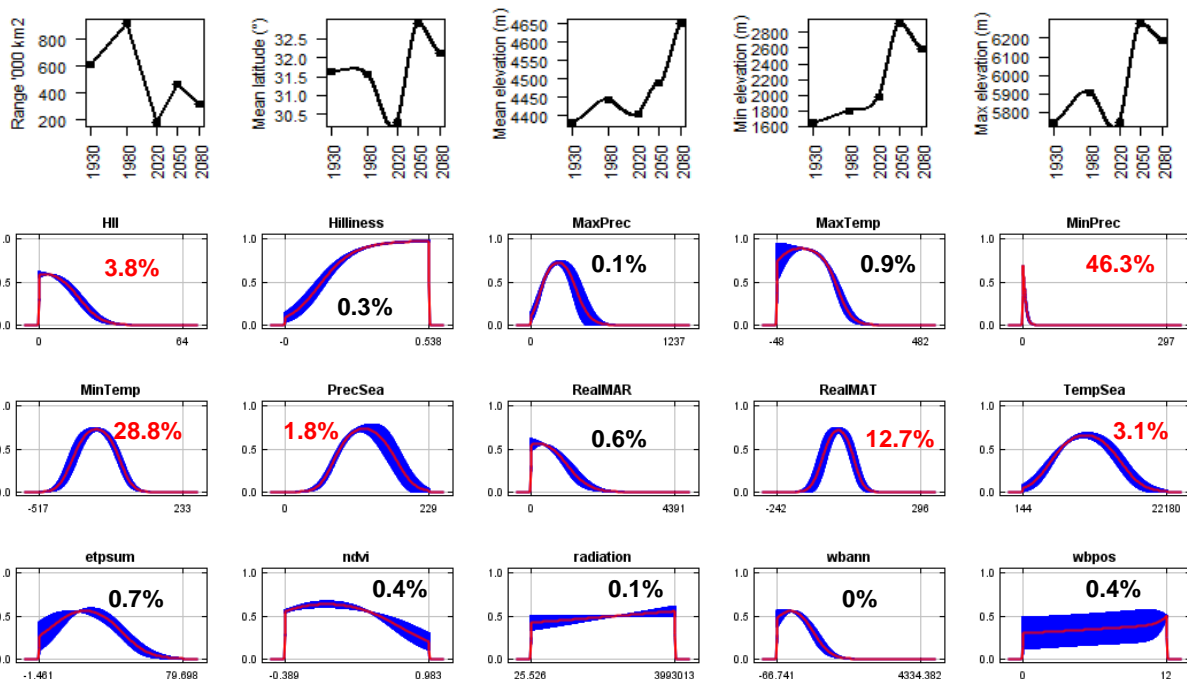



**#49 – Hoffmann’s pika (*Ochotona hoffmanni*)**

*n* = 5

**Expert:** Andrey Lissovsky, Zoological Museum of Moscow State University

**Expert evaluation:** Medium

**Data:** Modern and historic

**Envelope:** Climatic and habitat

**Dispersal distance:** 3km/year (Asian pikas, range 1-15)

**Status:** MODELLABLE; **Included in final analysis:** √

| <b>Model evaluation metric</b> |             |
|--------------------------------|-------------|
| AUC                            | 0.99        |
| Omission rate                  | 0.00        |
| Sensitivity                    | 1.00        |
| Specificity                    | 0.99        |
| Proportion correct             | 0.99        |
| <b>Kappa</b>                   | <b>0.91</b> |
| True Skill Statistic           | 0.99        |

**Summary:** The Hoffmann’s pika’s bioclimatic envelope is predicted to decrease by 90% with a ~1° mean latitudinal shift towards the Equator and a mean increase in elevation of ~470m driven by an increase in minimum elevation. 95% of the permutation importance of the model was contributed to by precipitation seasonality (73.2%), mean annual temperature (12.6%), minimum temperature (6.5%) and minimum precipitation (5.3%).

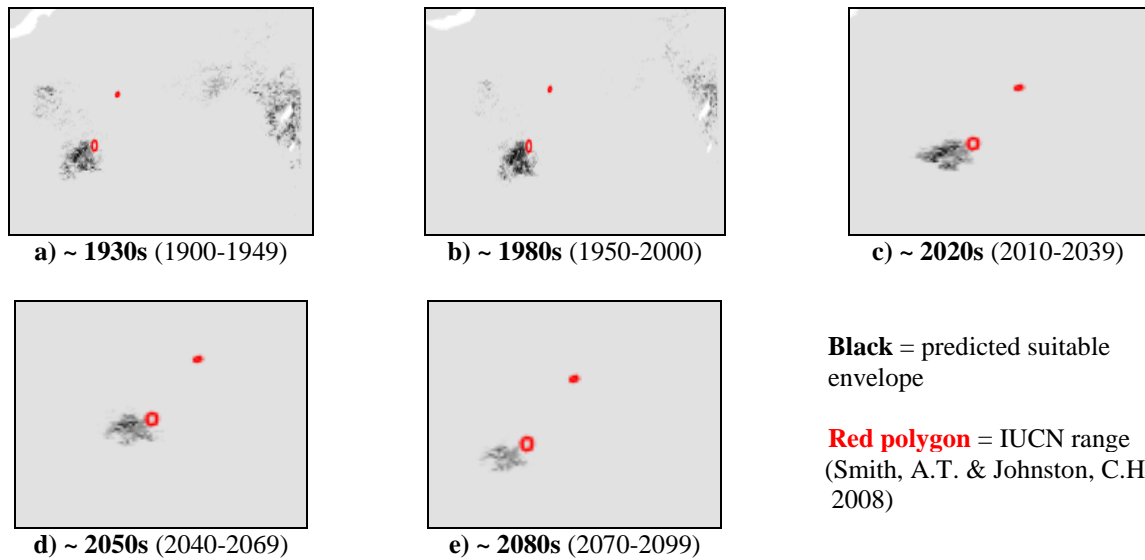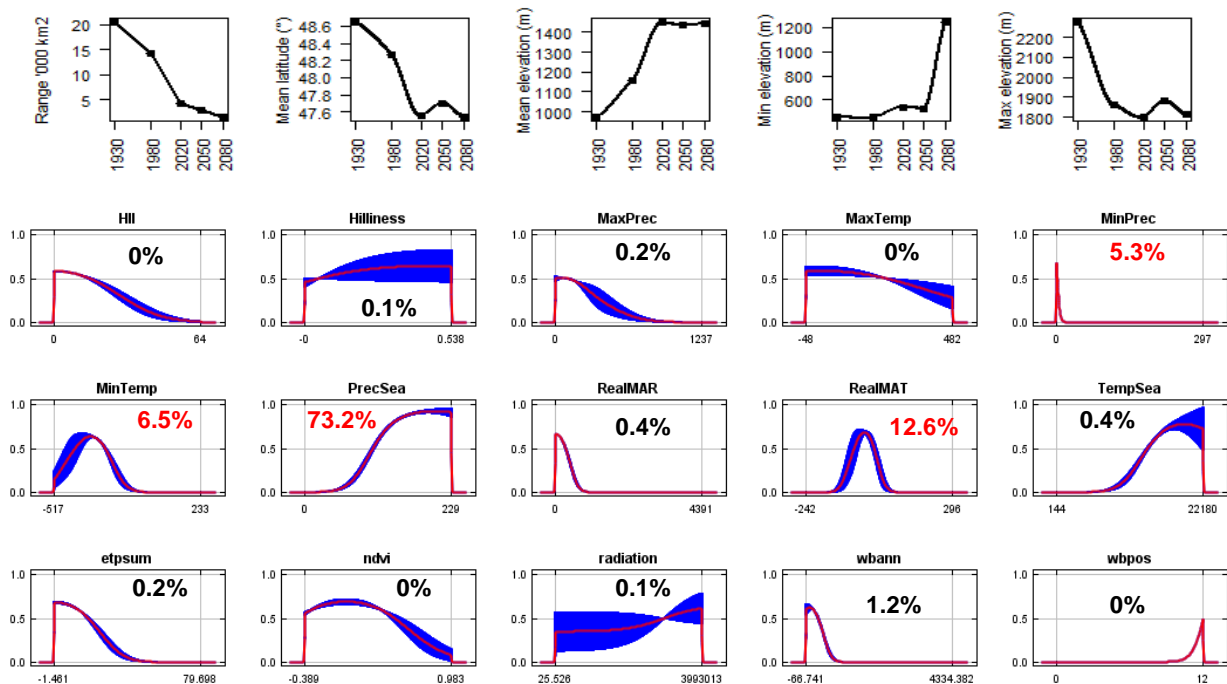



**#50 – Siberian pika (*Ochotona hyperborea*)**

*n* = 16

**Expert:** Julia Witzuk, Warsaw Agricultural University, Poland

**Expert evaluation:** Poor

**Data:** Modern and historic

**Envelope:** Climatic and habitat

**Dispersal distance:** 10km/year (Similar ecology to *O.alpina*)

**Status:** UNMODELLABLE; **Included in final analysis:** X

| Model evaluation metric |             |
|-------------------------|-------------|
| AUC                     | 0.97        |
| Omission rate           | 0.06        |
| Sensitivity             | 0.94        |
| Specificity             | 0.99        |
| Proportion correct      | 0.99        |
| <b>Kappa</b>            | <b>0.40</b> |
| True Skill Statistic    | 0.93        |

**Summary:** The Siberian pika’s bioclimatic envelope is predicted to decrease by 100% with a ~5° mean latitudinal polewards shift and a mean increase in elevation of ~200m driven by an increase in minimum and maximum elevation. 95% of the permutation importance of the model was contributed to by mean annual temperature (72.5%), annual evapotranspiration (10.4%), minimum precipitation (6.4%), human influence index (2.8%), normalised difference vegetation index (2.6%) and annual water balance (1.8%).

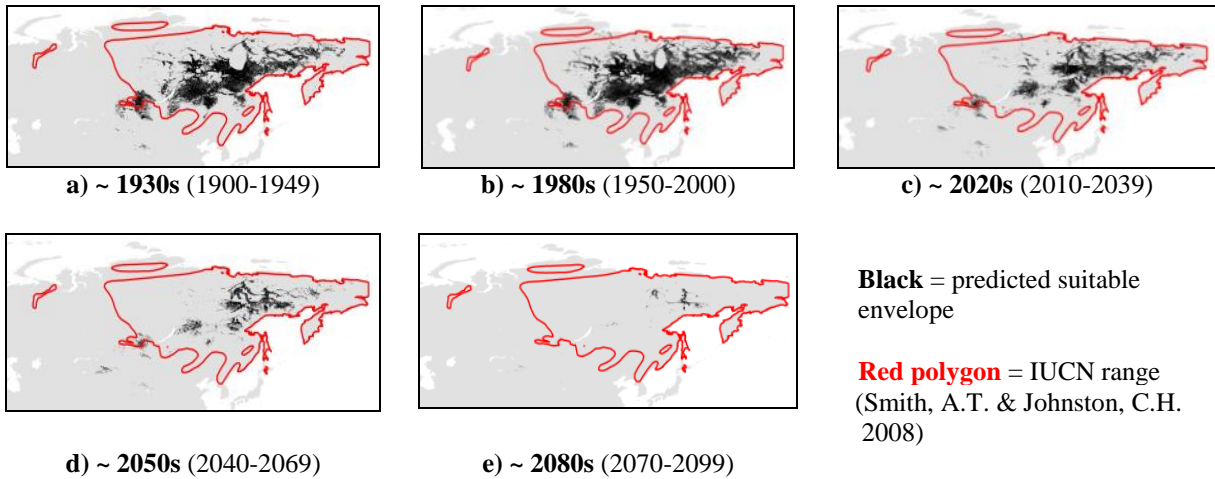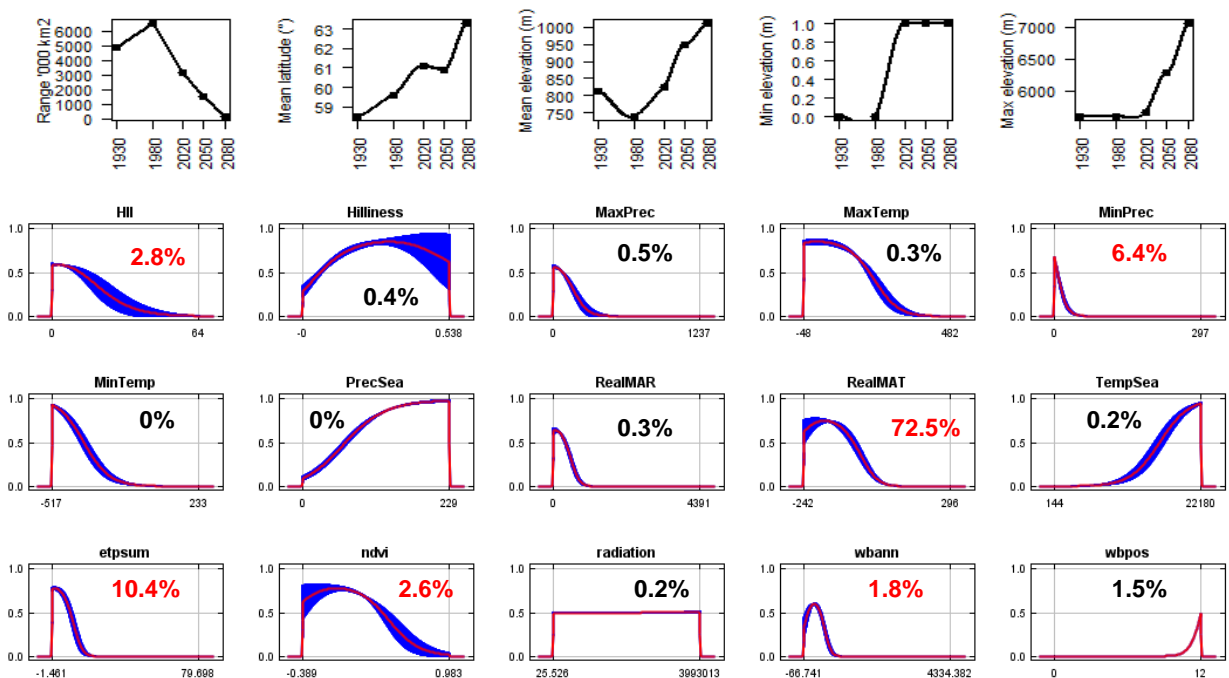

**#51– Ili pika (*Ochotona iliensis*)**

*n* = 11

**Expert:** Andrew Smith, Arizona State University

**Expert evaluation:** Poor

**Data:** Only modern

**Envelope:** Climatic and habitat

**Dispersal distance:** 1km/year (Similar ecology to *O.koslowi*)

**Status:** UNMODELLABLE; **Included in final analysis:** X

| Model evaluation metric |             |
|-------------------------|-------------|
| AUC                     | 0.99        |
| Omission rate           | 0.00        |
| Sensitivity             | 1.00        |
| Specificity             | 0.99        |
| Proportion correct      | 0.99        |
| <b>Kappa</b>            | <b>0.55</b> |
| True Skill Statistic    | 0.99        |

**Summary:** The Ili pika’s bioclimatic envelope is predicted to decrease by 20% with a ~1° mean latitudinal polewards shift and a mean increase in elevation of ~80m. 95% of the permutation importance of the model was contributed to by minimum precipitation (52.7%), minimum temperature (22.2%), mean annual temperature (8.8%), maximum precipitation (6.5%), temperature seasonality (3.0%) and human influence index (2.2%).

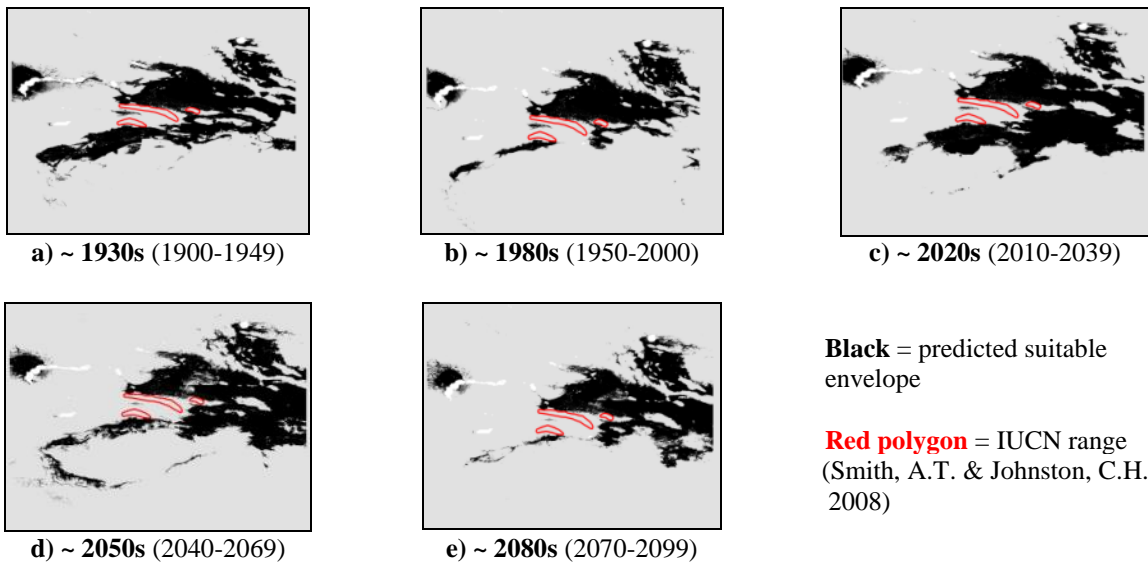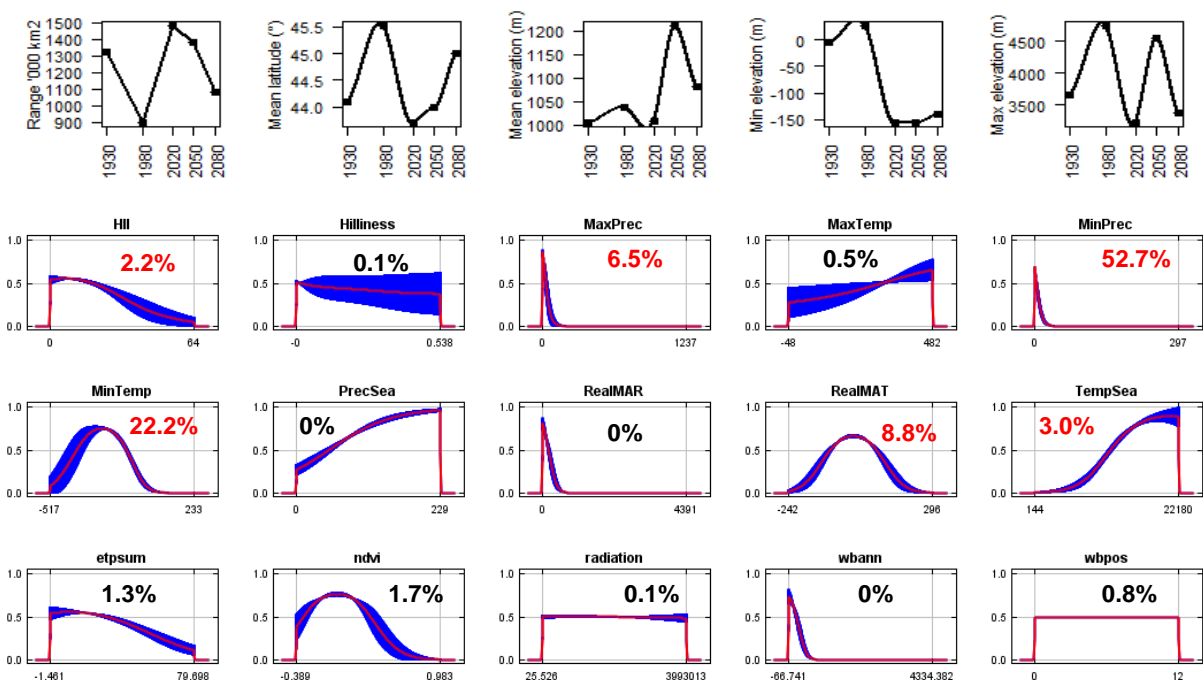

#52 – Kozlov’s pika (*Ochotona koslowi*)

$n = 5$

**Expert:** Andrew Smith, Arizona State University

**Expert evaluation:** Medium

**Data:** Only modern

**Envelope:** Climatic and habitat

**Dispersal distance:** 1km/year (Expert)

**Status:** MODELLABLE; **Included in final analysis:**  $\checkmark$

| Model evaluation metric |             |
|-------------------------|-------------|
| AUC                     | 0.99        |
| Omission rate           | 0.00        |
| Sensitivity             | 1.00        |
| Specificity             | 0.99        |
| Proportion correct      | 0.99        |
| <b>Kappa</b>            | <b>0.86</b> |
| True Skill Statistic    | 0.99        |

**Summary:** The Kozlov’s pika’s bioclimatic envelope is predicted to decrease by 100% (**total extinction**). 95% of the permutation importance of the model was contributed to by mean annual precipitation (66.8%), minimum precipitation (24.2%) and human influence index (5.8%).

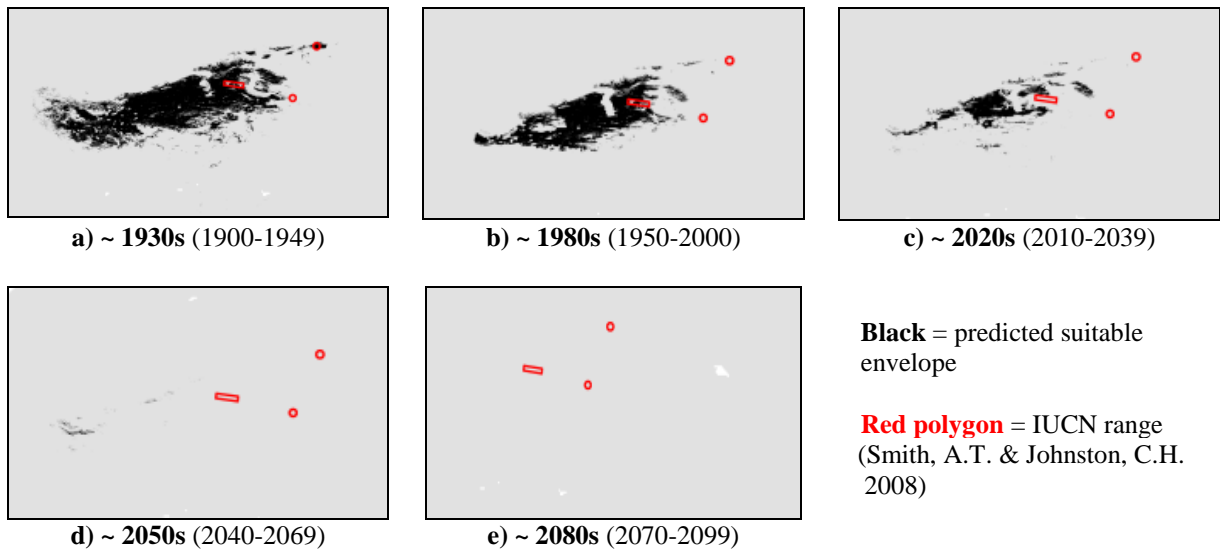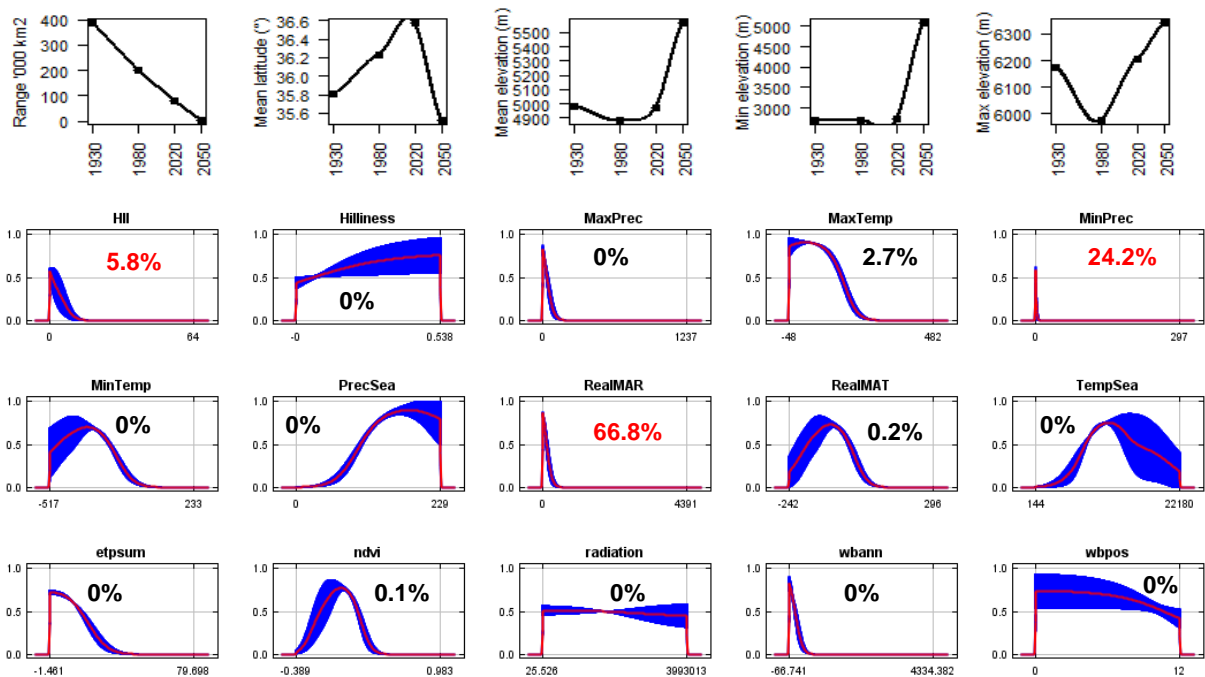

**#53 – Ladak pika (*Ochotona ladacensis*)**

*n* = 18

**Expert:** Andrew Smith, Arizona State University

**Expert evaluation:** Medium

**Data:** Modern and historic

**Envelope:** Climatic and habitat

**Dispersal distance:** 0.05km/year (Similar ecology to *O.curzoniae*)

**Status:** MODELLABLE; **Included in final analysis:** √

| Model evaluation metric |             |
|-------------------------|-------------|
| AUC                     | 0.99        |
| Omission rate           | 0.00        |
| Sensitivity             | 1.00        |
| Specificity             | 0.99        |
| Proportion correct      | 0.99        |
| <b>Kappa</b>            | <b>0.63</b> |
| True Skill Statistic    | 0.99        |

**Summary:** The Ladak pika’s bioclimatic envelope is predicted to decrease by 70% with a ~1° mean latitudinal shift towards the Equator and a mean increase in elevation of ~1400m driven by an increase in minimum and maximum elevation. 95% of the permutation importance of the model was contributed to by mean annual precipitation (47.9%), minimum precipitation (41.7%) and minimum temperature (5.7%).

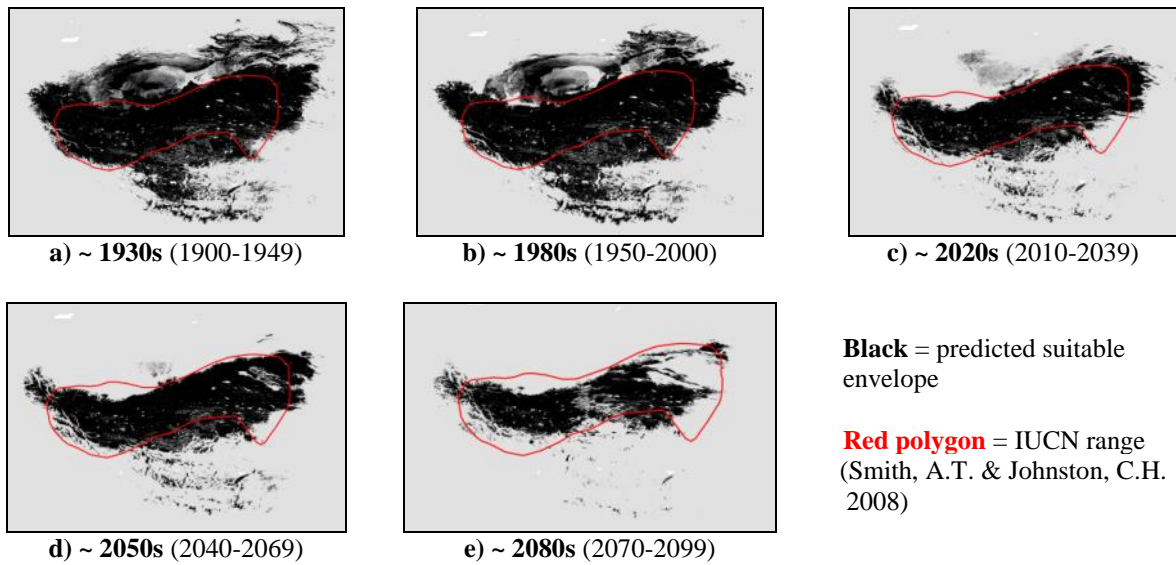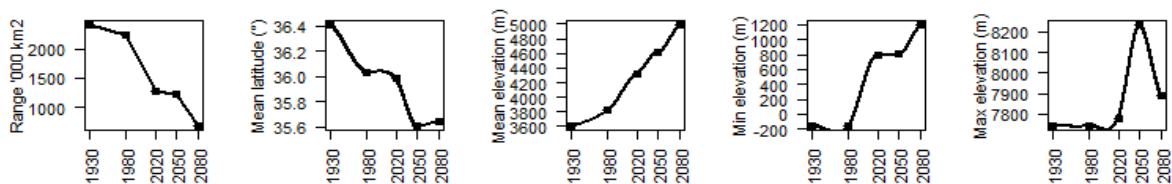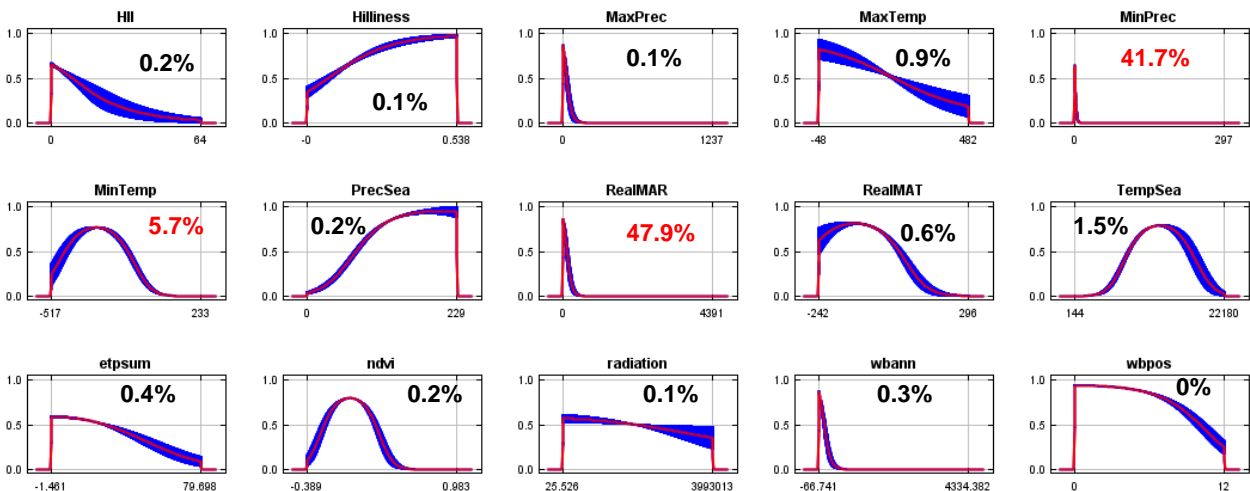

**#54 – Large-eared pika (*Ochotona macrotis*)**

*n* = 49

**Expert:** Nishma Dahal, National Centre for Biological Sciences, India

**Expert evaluation:** Medium

**Data:** Modern and historic

**Envelope:** Climatic and habitat

**Dispersal distance:** 1km/year (Similar ecology to *O.roylei*)

**Status:** MODELLABLE; **Included in final analysis:** ✓

| Model evaluation metric |             |
|-------------------------|-------------|
| AUC                     | 0.94        |
| Omission rate           | 0.10        |
| Sensitivity             | 0.90        |
| Specificity             | 0.99        |
| Proportion correct      | 0.99        |
| <b>Kappa</b>            | <b>0.43</b> |
| True Skill Statistic    | 0.89        |

**Summary:** The Large-eared pika’s bioclimatic envelope is predicted to decrease by 40% with a ~1° mean latitudinal shift towards the Equator and a mean increase in elevation of ~880m driven by an increase in minimum elevation. 95% of the permutation importance of the model was contributed to by minimum precipitation (87.3%), minimum temperature (5.8%) and mean annual temperature (2.1%).

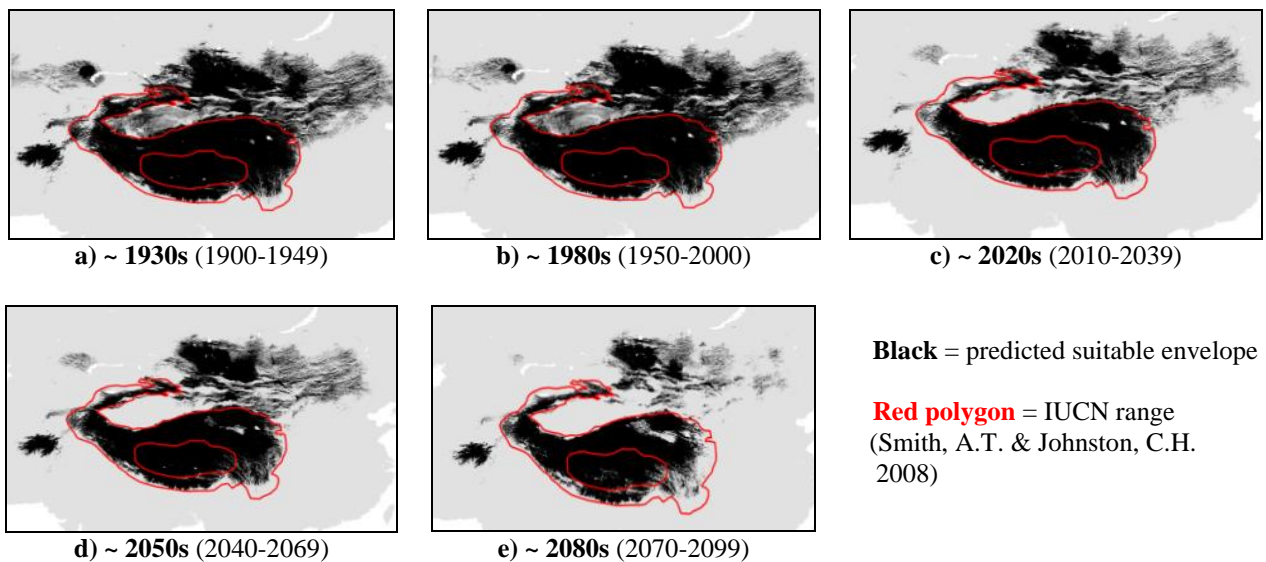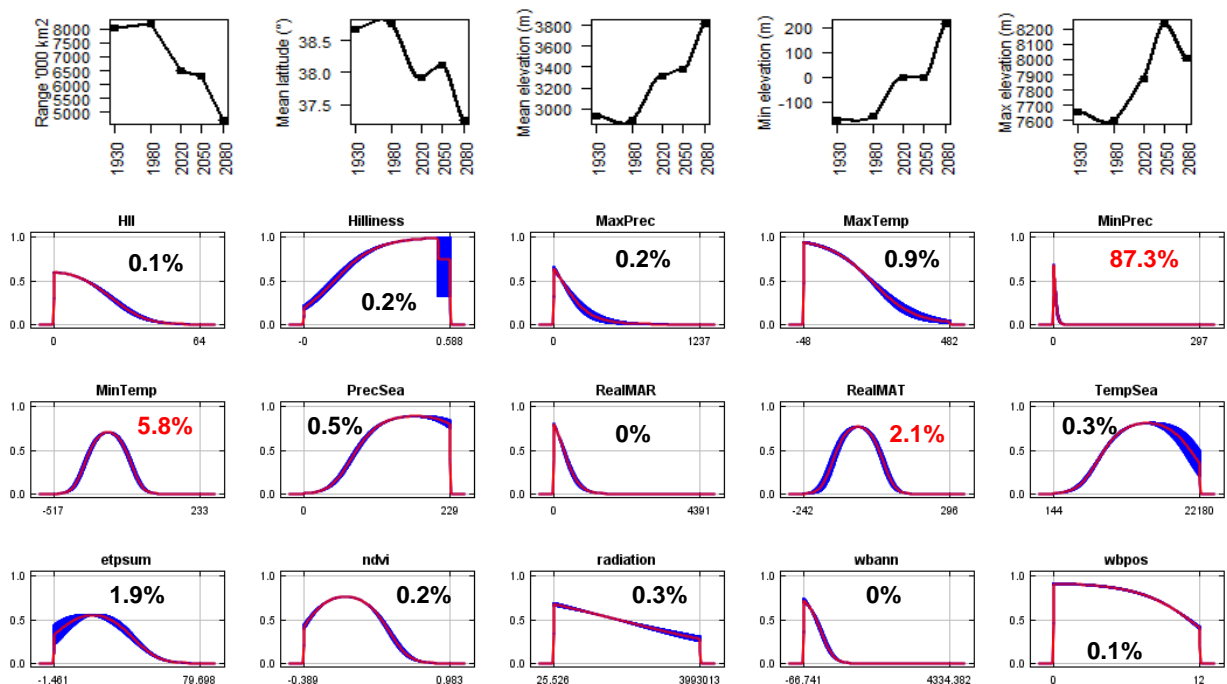



**#55 – Nubra’s pika (*Ochotona nubrica*)**

*n* = 13

**Expert:** Nishma Dahal, National Centre for Biological Sciences, India

**Expert evaluation:** Medium

**Data:** Only modern

**Envelope:** Climatic and habitat

**Dispersal distance:** 0.05km/year (Similar ecology to *O.curzoniae*)

**Status:** UNMODELLABLE; **Included in final analysis:** X

| <b>Model evaluation metric</b> |             |
|--------------------------------|-------------|
| AUC                            | 0.99        |
| Omission rate                  | 0.00        |
| Sensitivity                    | 1.00        |
| Specificity                    | 0.99        |
| Proportion correct             | 0.99        |
| <b>Kappa</b>                   | <b>0.35</b> |
| True Skill Statistic           | 0.99        |

**Summary:** The Nubra’s pika’s bioclimatic envelope is predicted to increase by 1% with no latitudinal polewards shift, but a mean increase in elevation of ~200m driven by an increase in minimum and maximum elevation. 95% of the permutation importance of the model was contributed to by minimum precipitation (76.1%) and mean annual temperature (20.9%).

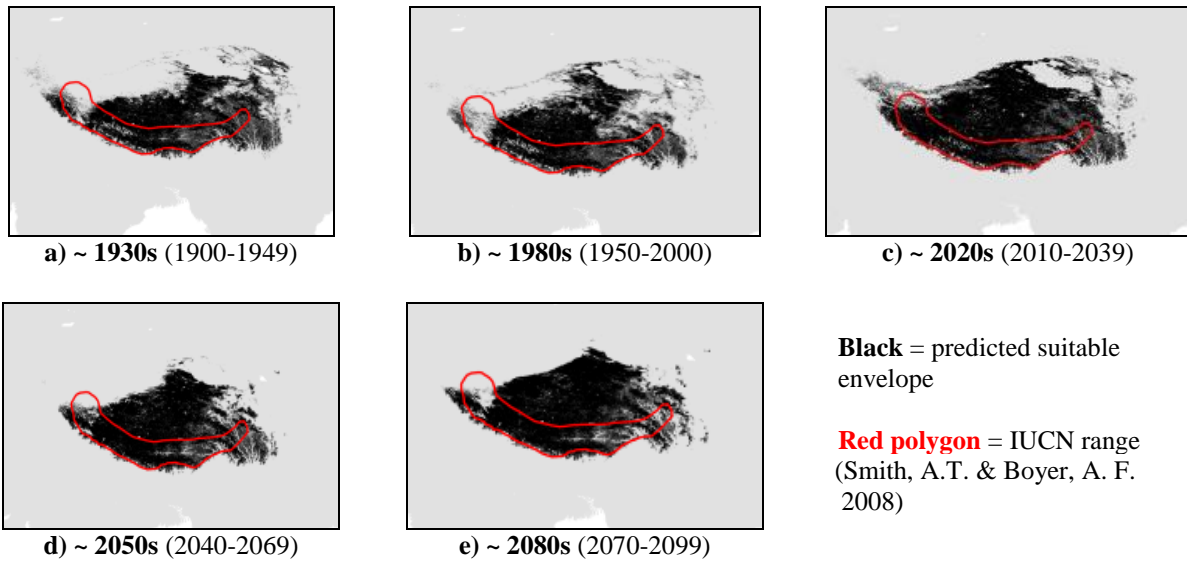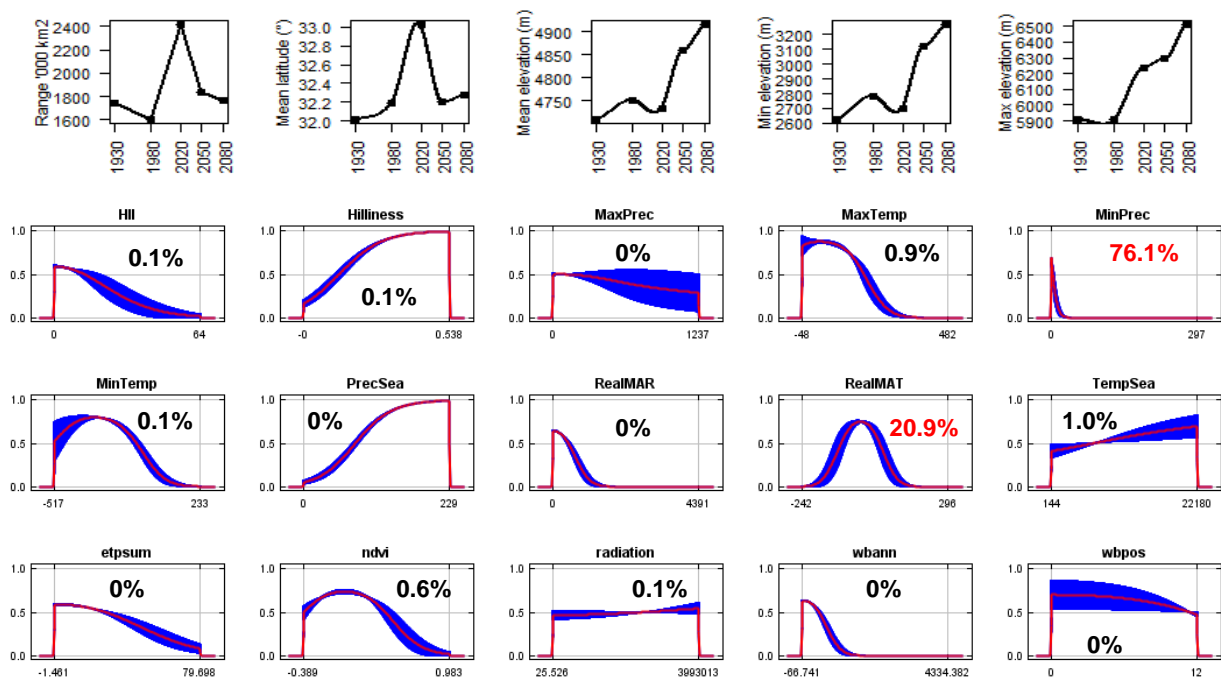



**#56 – Pallas’s pika (*Ochotona pallasii*)**

*n* = 19

**Expert:** Andrew Smith, Arizona State University

**Expert evaluation:** Medium

**Data:** Only modern

**Envelope:** Climatic and habitat

**Dispersal distance:** 10km/year (Sokolov, V.E. *et al.*, 2009)

**Status:** MODELLABLE; **Included in final analysis:** ✓

| Model evaluation metric |             |
|-------------------------|-------------|
| AUC                     | 0.99        |
| Omission rate           | 0.00        |
| Sensitivity             | 1.00        |
| Specificity             | 0.99        |
| Proportion correct      | 0.99        |
| <b>Kappa</b>            | <b>0.46</b> |
| True Skill Statistic    | 0.99        |

**Summary:** The Pallas’s pika’s bioclimatic envelope is predicted to decrease by 60% with a ~2° mean latitudinal polewards shift and a mean increase in elevation of ~40m driven by an increase in minimum elevation. 95% of the permutation importance of the model was contributed to by minimum precipitation (46.1%), mean annual precipitation (35.5%), mean annual temperature (9.4%) and minimum temperature (6.7%).

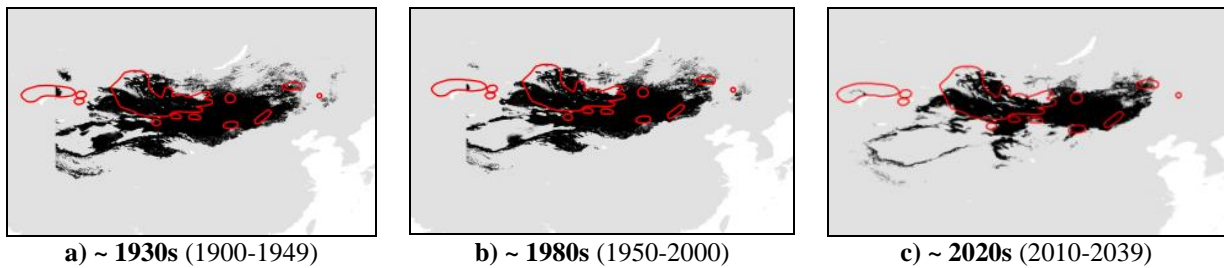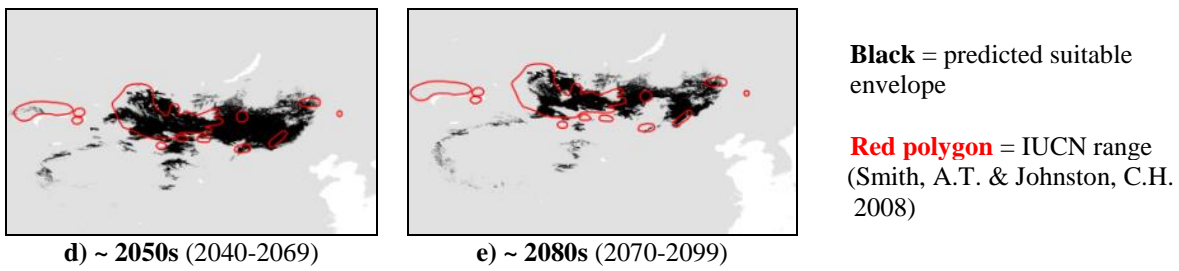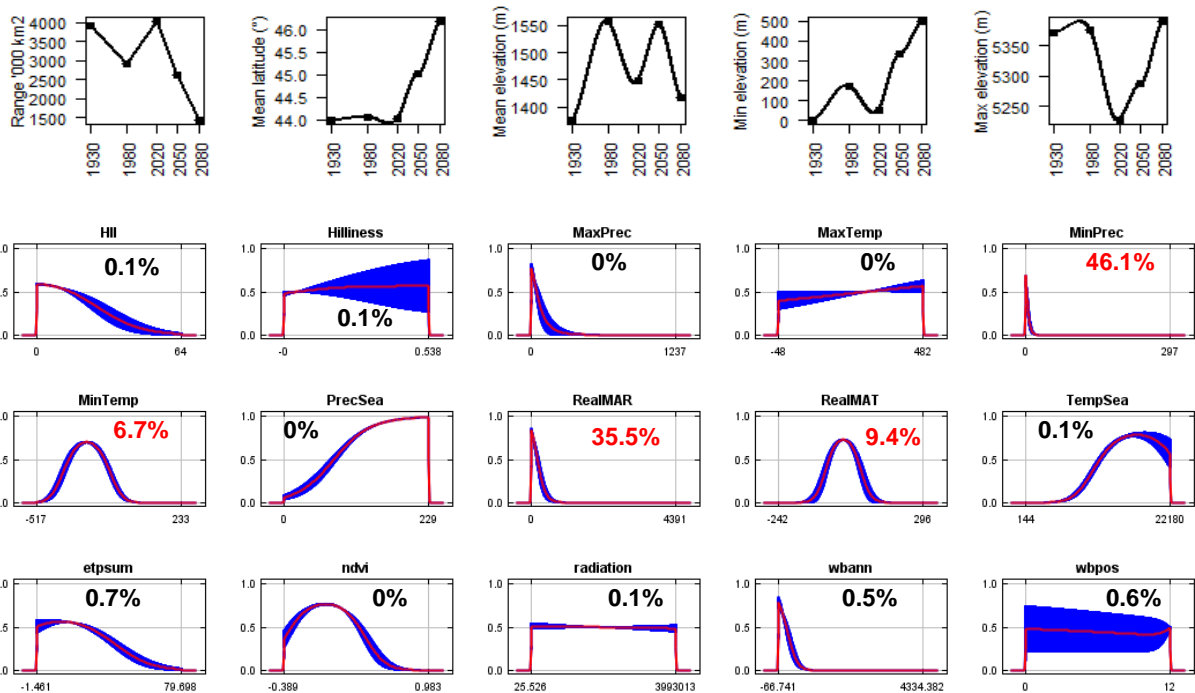

**#57 – American pika (*Ochotona princeps*)**

*n* = 670

**Expert:** Andrew Smith, Arizona State University

**Expert evaluation:** Medium

**Data:** Only modern

**Envelope:** Climatic and habitat

**Dispersal distance:** 16.1km/year (Expert)

**Status:** MODELLABLE; **Included in final analysis:** ✓

| Model evaluation metric |             |
|-------------------------|-------------|
| AUC                     | 0.95        |
| Omission rate           | 0.10        |
| Sensitivity             | 0.9         |
| Specificity             | 0.99        |
| Proportion correct      | 0.98        |
| <b>Kappa</b>            | <b>0.87</b> |
| True Skill Statistic    | 0.89        |

**Summary:** The American pika’s bioclimatic envelope is predicted to decrease by 25% with a ~1° mean latitudinal polewards shift and a mean decrease in elevation of ~10m driven by an decrease in minimum elevation. 95% of the permutation importance of the model was contributed to by mean annual temperature (88.1%), annual evapotranspiration (5.0%) and maximum temperature (2.8%).

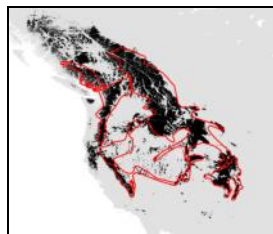

a) ~ 1930s (1900-1949)

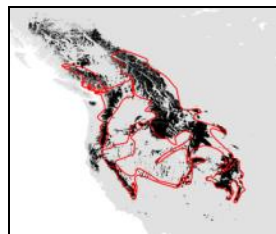

b) ~ 1980s (1950-2000)

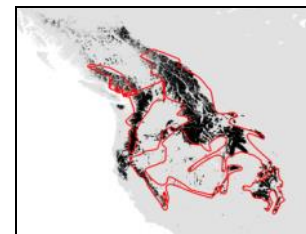

c) ~ 2020s (2010-2039)

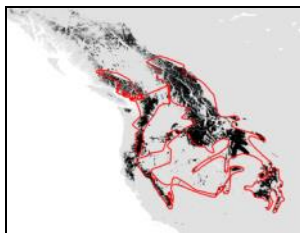

d) ~ 2050s (2040-2069)

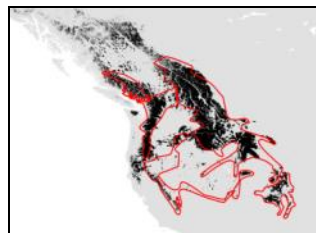

e) ~ 2080s (2070-2099)

**Black** = predicted suitable envelope

**Red polygon** = IUCN range (Beever, E. & Smith, A.T. 2011)

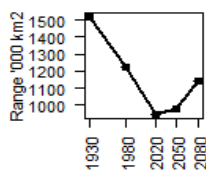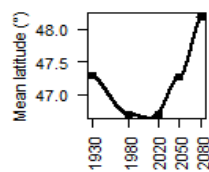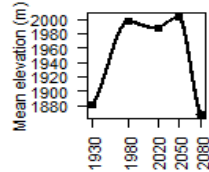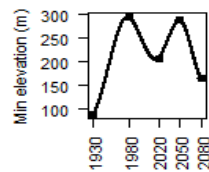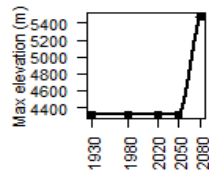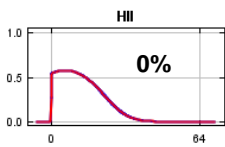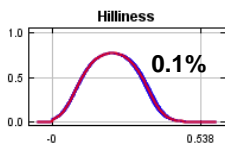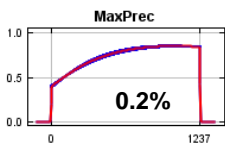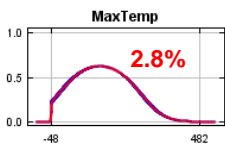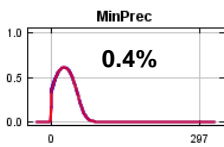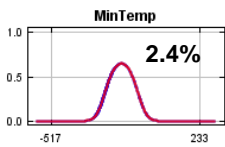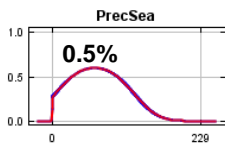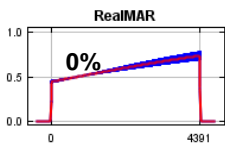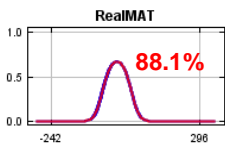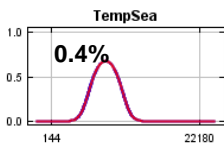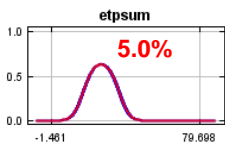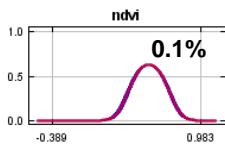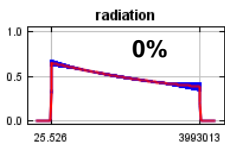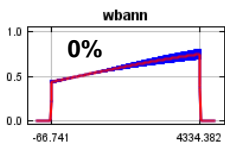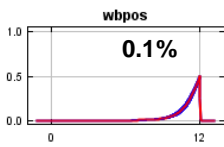

**#58 – Little pika (*Ochotona pusilla*)**

*n* = 30

**Expert:** Andrew Smith, Arizona State University

**Expert evaluation:** Medium

**Data:** Modern and historic

**Envelope:** Climatic and habitat

**Dispersal distance:** 4km/year (Sokolov, V.E. *et al.*, 2009)

**Status:** MODELLABLE; **Included in final analysis:** ✓

| Model evaluation metric |             |
|-------------------------|-------------|
| AUC                     | 0.93        |
| Omission rate           | 0.13        |
| Sensitivity             | 0.87        |
| Specificity             | 0.99        |
| Proportion correct      | 0.99        |
| <b>Kappa</b>            | <b>0.58</b> |
| True Skill Statistic    | 0.86        |

**Summary:** The Little pika’s bioclimatic envelope is predicted to increase by 20% with a ~1° mean latitudinal polewards shift and a mean increase in elevation of ~70m driven by an increase in maximum elevation. 95% of the permutation importance of the model was contributed to by temperature seasonality (70.2%), annual water balance (13.3%), mean annual temperature (10.2%) and minimum temperature (4.5%).

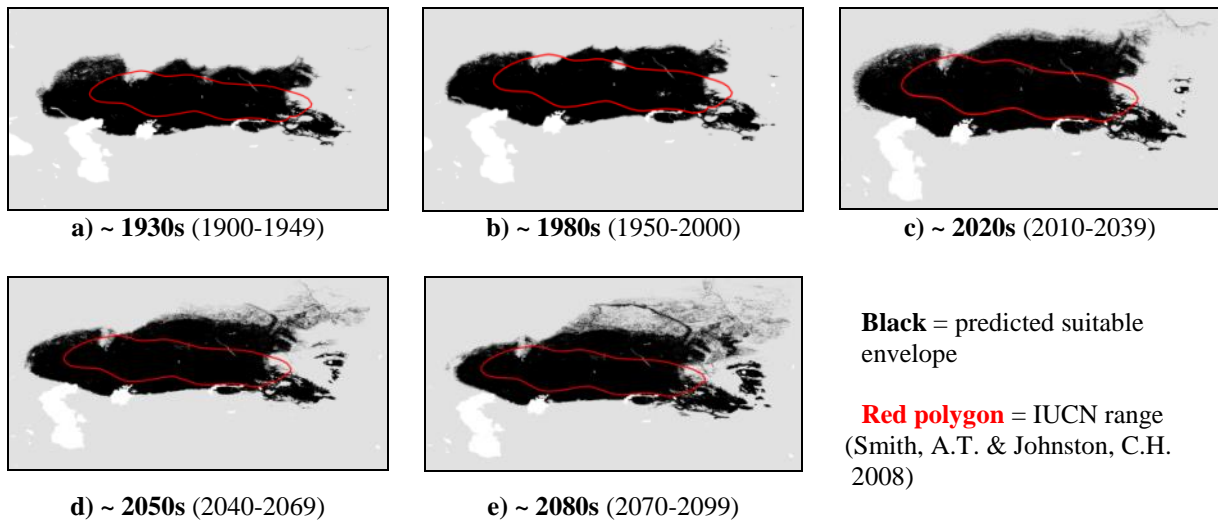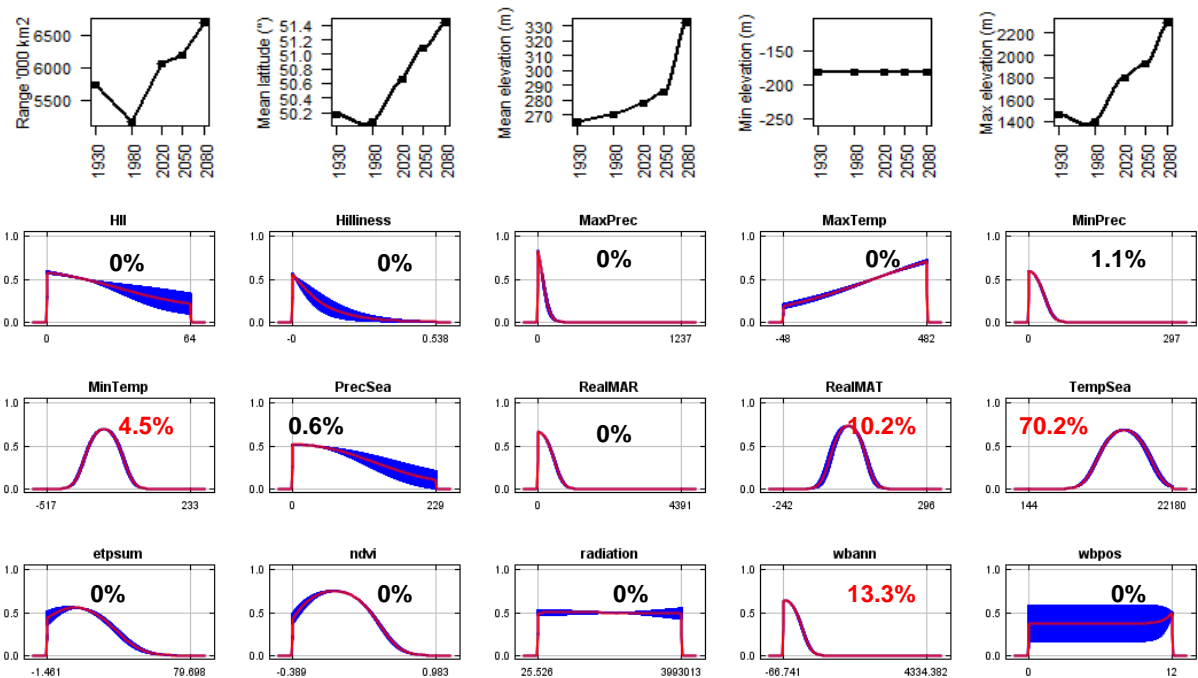

**#59 – Royle’s pika (*Ochotona roylei*)**

*n* = 22

**Expert:** Sabuj Bhattacharya, Wildlife Institute of India

**Expert evaluation:** Medium

**Data:** Modern and historic

**Envelope:** Climatic and habitat

**Dispersal distance:** 1km/year (Expert)

**Status:** MODELLABLE; **Included in final analysis:** ✓

| Model evaluation metric |             |
|-------------------------|-------------|
| AUC                     | 0.98        |
| Omission rate           | 0.05        |
| Sensitivity             | 0.95        |
| Specificity             | 0.99        |
| Proportion correct      | 0.99        |
| <b>Kappa</b>            | <b>0.76</b> |
| True Skill Statistic    | 0.95        |

**Summary:** The Royle’s pika’s bioclimatic envelope is predicted to decrease by 20% with no latitudinal polewards shift and a mean increase in elevation of ~340m driven by an increase in minimum elevation. 95% of the permutation importance of the model was contributed to by minimum precipitation (53.2%), maximum temperature (20.4%), temperature seasonality (10.2%), human influence index (5.5%), surface roughness index (4.2%) and precipitation seasonality (3.2%).

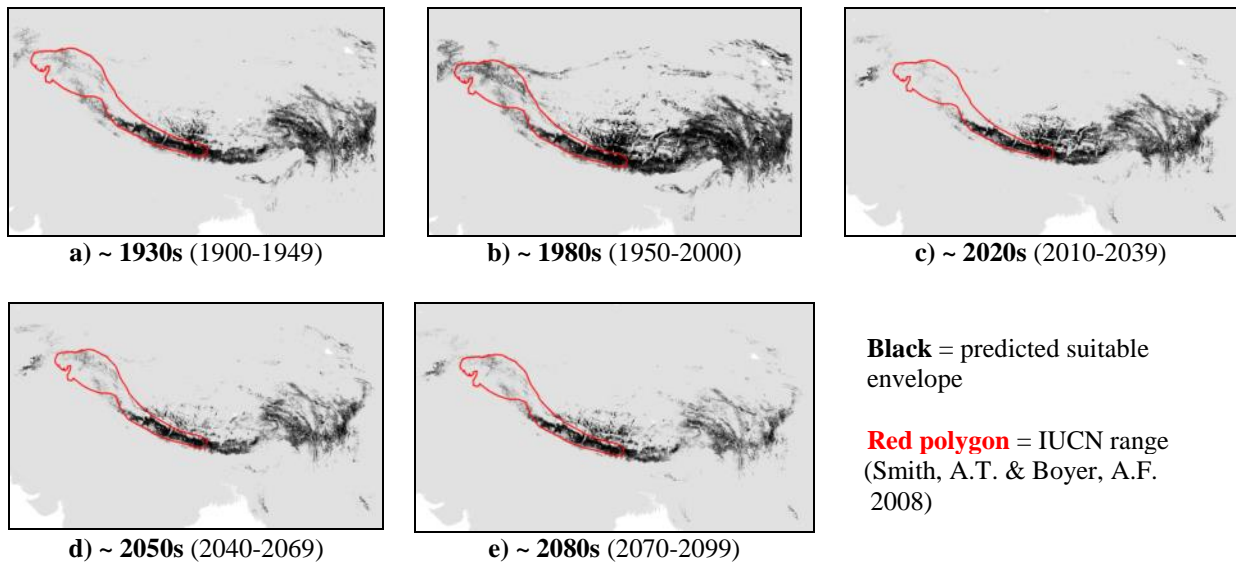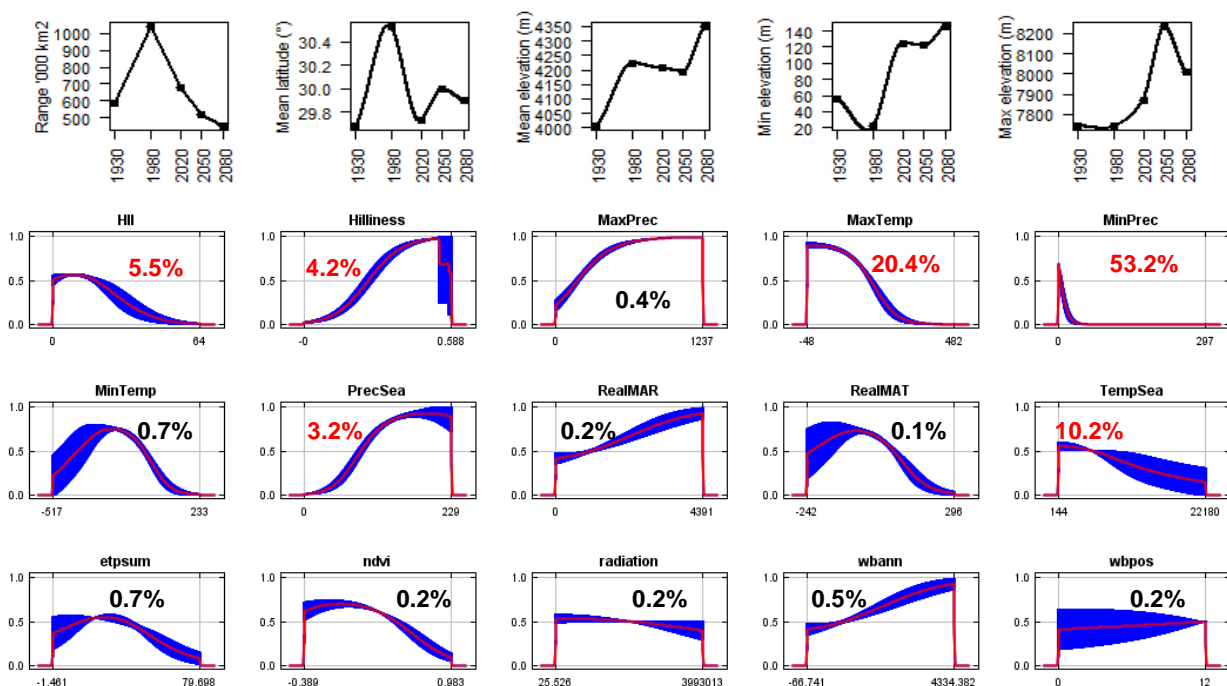

**#60 – Afghan pika (*Ochotona rufescens*)**

*n* = 17

**Expert:** Chelmala Srinivasulu, Osmania University, India

**Expert evaluation:** Medium

**Data:** Modern and historic

**Envelope:** Climatic and habitat

**Dispersal distance:** 3km/year (Asian pikas, range 1-15)

**Status:** MODELLABLE; **Included in final analysis:** ✓

| <b>Model evaluation metric</b> |             |
|--------------------------------|-------------|
| AUC                            | 0.99        |
| Omission rate                  | 0.00        |
| Sensitivity                    | 1.00        |
| Specificity                    | 0.99        |
| Proportion correct             | 0.99        |
| <b>Kappa</b>                   | <b>0.74</b> |
| True Skill Statistic           | 0.99        |

**Summary:** The Afghan pika’s bioclimatic envelope is predicted to increase by 5% with a ~1° mean latitudinal polewards shift and a mean increase in elevation of ~380m driven by an increase in maximum elevation. 95% of the permutation importance of the model was contributed to by minimum precipitation (89.2%), minimum temperature (5.5%) and normalised difference vegetation index (2.3%).

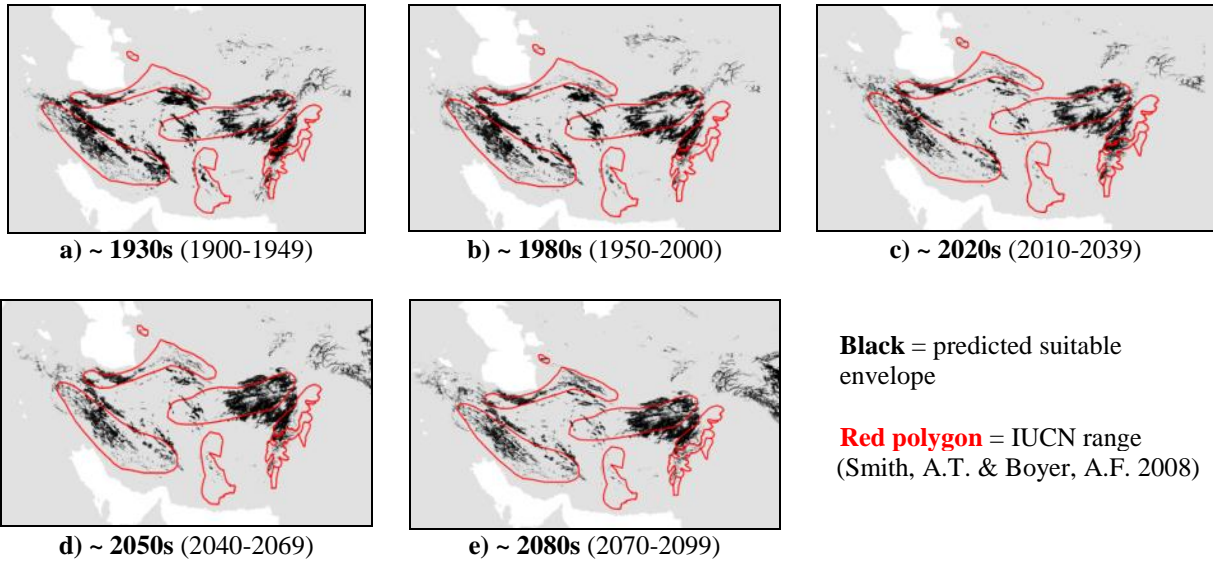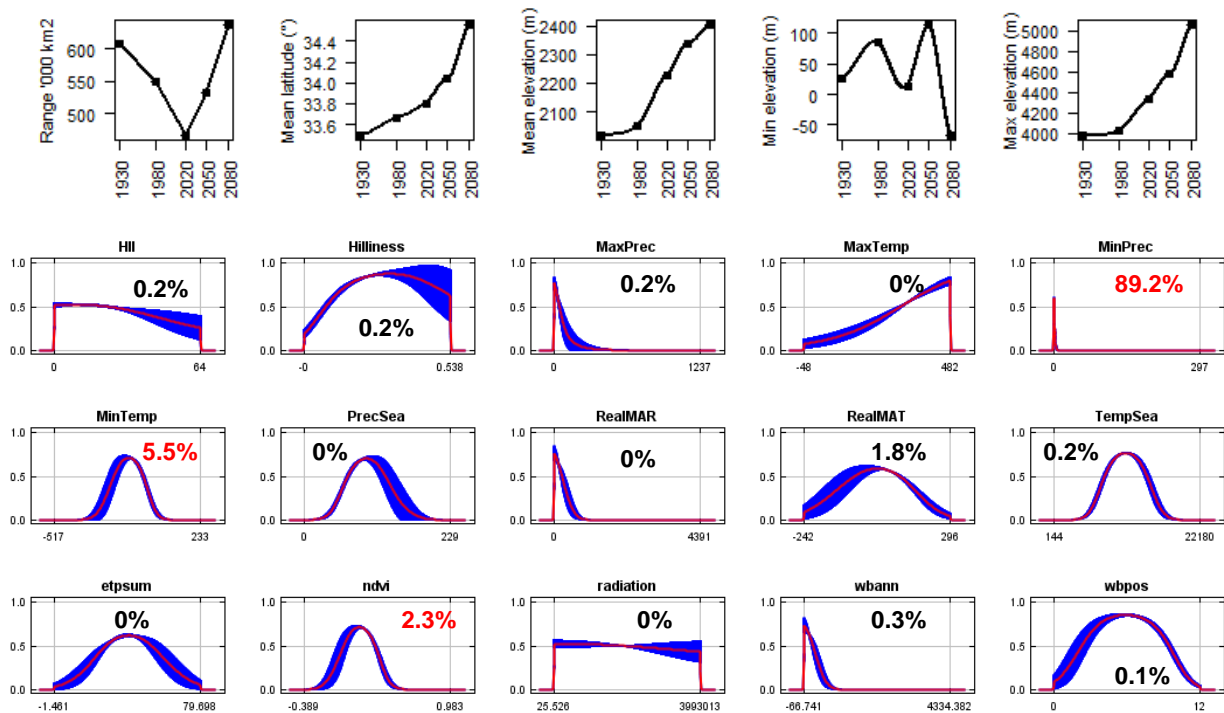



**#61 – Turkestan red pika (*Ochotona rutila*)**

*n* = 13

**Expert:** Andrey Lissovsky, Zoological Museum of Moscow State University

**Expert evaluation:** Poor

**Data:** Modern and historic

**Envelope:** Climatic and habitat

**Dispersal distance:** 3km/year (Asian pikas, range 1-15)

**Status:** UNMODELLABLE; **Included in final analysis:** X

| Model evaluation metric |             |
|-------------------------|-------------|
| AUC                     | 0.99        |
| Omission rate           | 0.00        |
| Sensitivity             | 1.00        |
| Specificity             | 0.99        |
| Proportion correct      | 0.99        |
| <b>Kappa</b>            | <b>0.25</b> |
| True Skill Statistic    | 0.99        |

**Summary:** The Turkestan red pika's bioclimatic envelope is predicted to decrease by 10% with a ~1° mean latitudinal shift towards the Equator and a mean increase in elevation of ~630m driven by an increase in maximum elevation. 95% of the permutation importance of the model was contributed to by minimum precipitation (82.5%), minimum temperature (5.9%), human influence index (3.0%), precipitation seasonality (2.5%) and surface roughness index (1.7%).

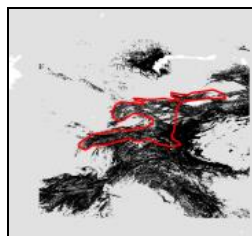

a) ~ 1930s (1900-1949)

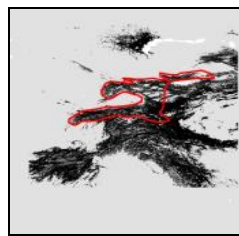

b) ~ 1980s (1950-2000)

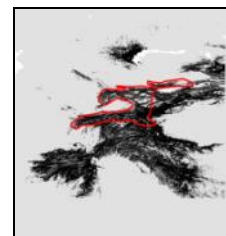

c) ~ 2020s (2010-2039)

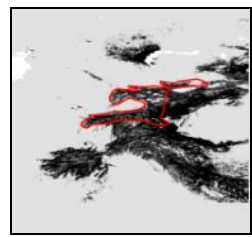

d) ~ 2050s (2040-2069)

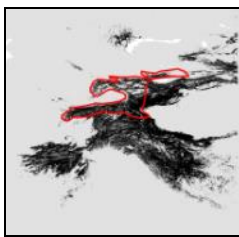

e) ~ 2080s (2070-2099)

**Black** = predicted suitable envelope

**Red polygon** = IUCN range (Smith, A.T. & Boyer, A.F. 2008)

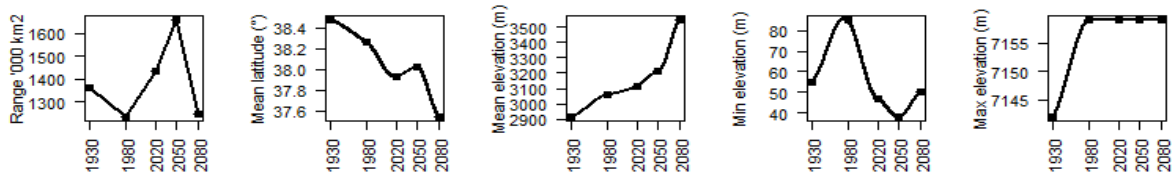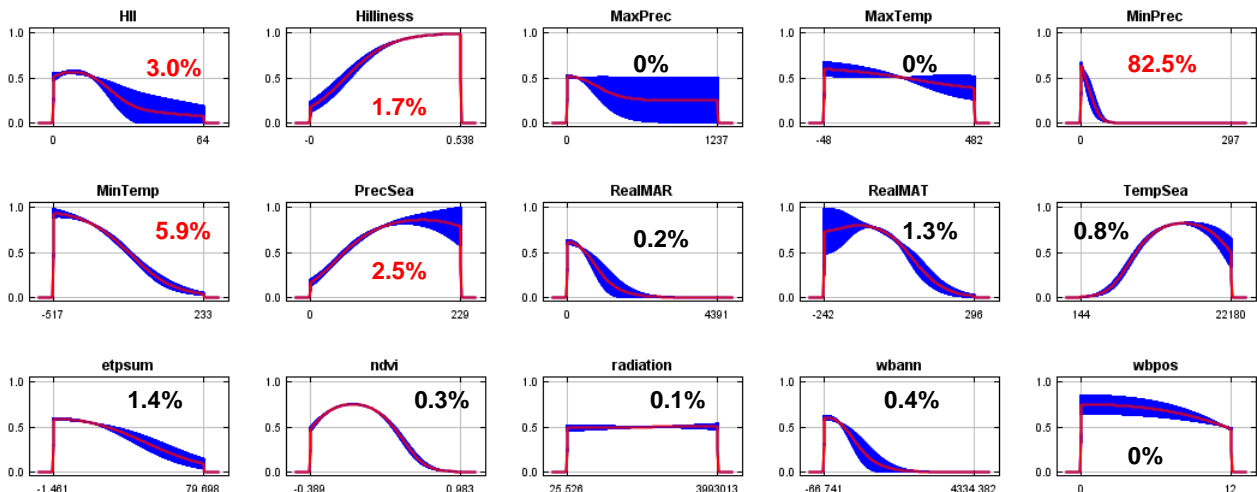

**#62 – Moupin pika (*Ochotona thibetana*)**

*n* = 95

**Expert:** Deyan Ge, Institute of Zoology, Chinese Academy of Sciences

**Expert evaluation:** Poor

**Data:** Modern and historic

**Envelope:** Climatic and habitat

**Dispersal distance:** 2km/year (Similar ecology to *O.roylei*)

**Status:** UNMODELLABLE; **Included in final analysis:** X

| Model evaluation metric |             |
|-------------------------|-------------|
| AUC                     | 0.93        |
| Omission rate           | 0.13        |
| Sensitivity             | 0.87        |
| Specificity             | 0.99        |
| Proportion correct      | 0.99        |
| <b>Kappa</b>            | <b>0.52</b> |
| True Skill Statistic    | 0.86        |

**Summary:** The Moupin pika’s bioclimatic envelope is predicted to increase by 10% with a ~2° mean latitudinal polewards shift and a mean increase in elevation of ~370m driven by an increase in maximum elevation. 95% of the permutation importance of the model was contributed to by minimum precipitation (43.5%), maximum temperature (38.5%), temperature seasonality (7.7%), annual evapotranspiration (3.7%) and mean annual precipitation (3.1%).

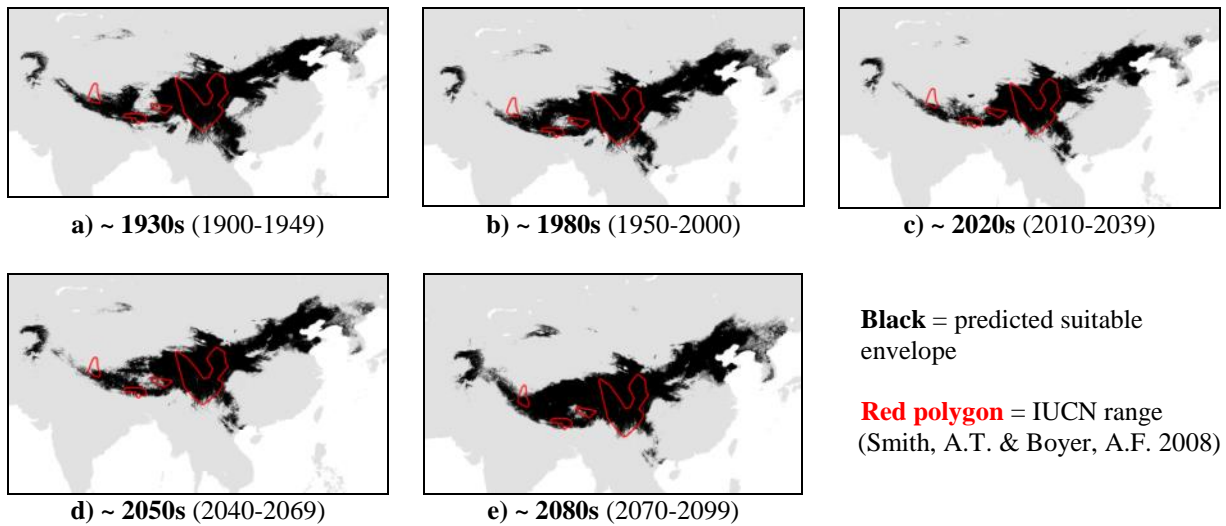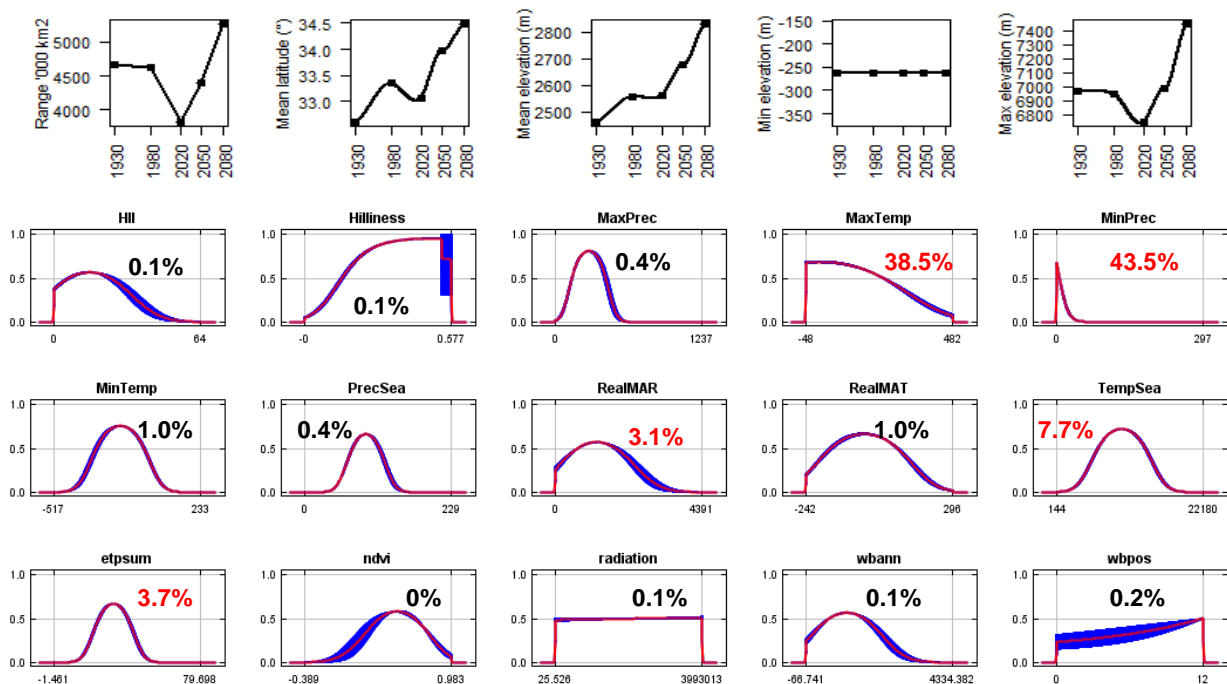

**#63 – Thomas’s pika (*Ochotona thomasi*)**

*n* = 16

**Expert:** Andrew Smith, Arizona State University

**Expert evaluation:** Good

**Data:** Modern and historic

**Envelope:** Climatic and habitat

**Dispersal distance:** 1km/year (Similar ecology to *O.koslowi*)

**Status:** MODELLABLE; **Included in final analysis:** √

| Model evaluation metric |             |
|-------------------------|-------------|
| AUC                     | 0.99        |
| Omission rate           | 0.00        |
| Sensitivity             | 1.00        |
| Specificity             | 0.99        |
| Proportion correct      | 0.99        |
| <b>Kappa</b>            | <b>0.58</b> |
| True Skill Statistic    | 0.99        |

**Summary:** The Thomas’s pika’s bioclimatic envelope is predicted to decrease by 70% with a ~1.5° mean latitudinal polewards shift and a mean increase in elevation of ~590m driven by an increase in maximum and minimum elevation. 95% of the permutation importance of the model was contributed to by minimum precipitation (56.6%), mean annual temperature (23.4%), minimum temperature (14.2%) and evapotranspiration (2.8%).

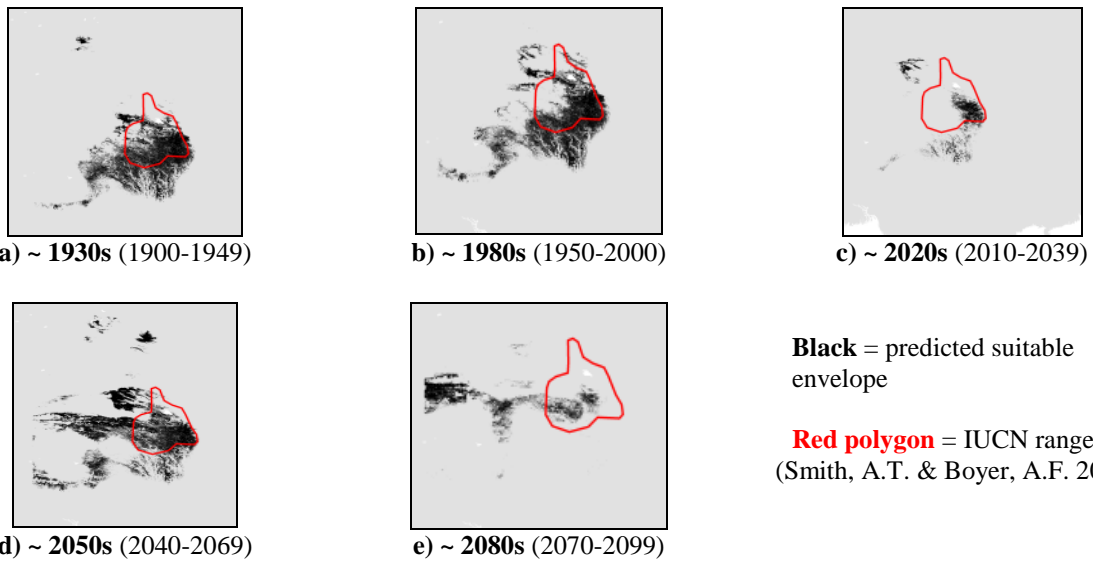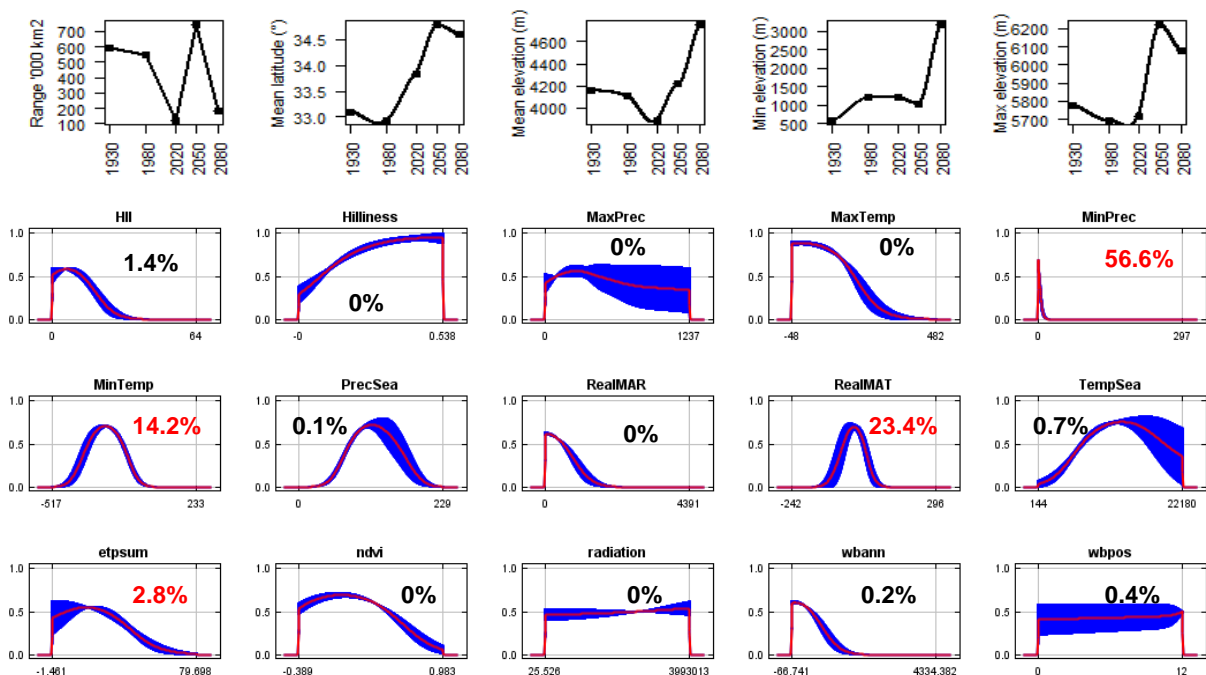

**#64 – Turuchan pika (*Ochotona turuchanensis*)**

*n* = 30

**Expert:** Andrey Lissovsky, Zoological Museum of Moscow State University

**Expert evaluation:** Medium

**Data:** Modern and historic

**Envelope:** Climatic and habitat

**Dispersal distance:** 15km/year (Expert)

**Status:** MODELLABLE; **Included in final analysis:** ✓

| Model evaluation metric |             |
|-------------------------|-------------|
| AUC                     | 0.93        |
| Omission rate           | 0.13        |
| Sensitivity             | 0.87        |
| Specificity             | 0.99        |
| Proportion correct      | 0.99        |
| <b>Kappa</b>            | <b>0.50</b> |
| True Skill Statistic    | 0.86        |

**Summary:** The Turuchan pika’s bioclimatic envelope is predicted to increase by 50% with a ~2° mean latitudinal polewards shift and a mean increase in elevation of ~70m driven by an increase in minimum elevation. 95% of the permutation importance of the model was contributed to by minimum temperature (21.6%), minimum precipitation (19.9%), human influence index (15.2%), annual evapotranspiration (10.9%).

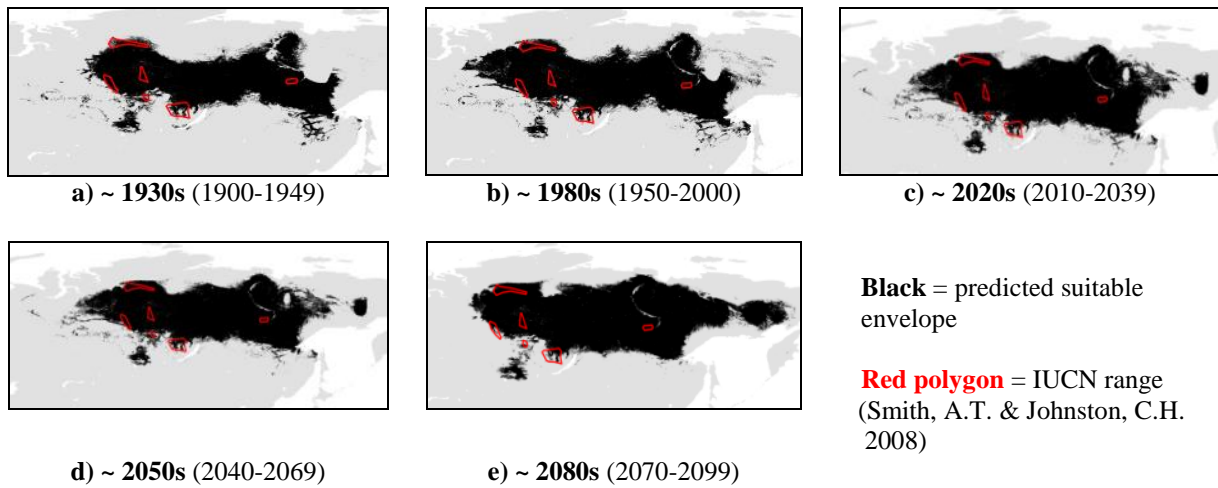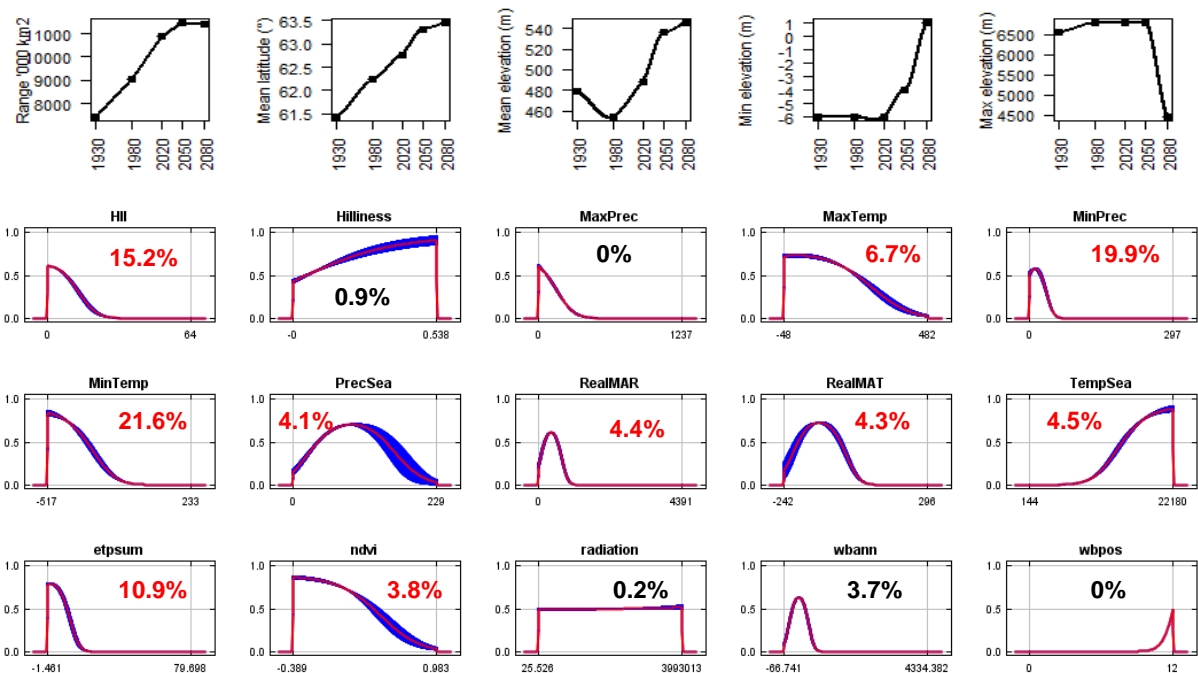

**#65 – European rabbit (*Oryctolagus cuniculus*)**

*n* = 22,712

**Expert:** Neil Reid, Queen’s University Belfast

**Expert evaluation:** Medium

**Data:** Modern and historic

**Envelope:** Climatic and habitat

**Dispersal distance:** 1km/year (Expert)

**Status:** UNMODELLABLE; **Included in final analysis:** X

| <b>Model evaluation metric</b> |             |
|--------------------------------|-------------|
| AUC                            | 0.62        |
| Omission rate                  | 0.16        |
| Sensitivity                    | 0.84        |
| Specificity                    | 0.39        |
| Proportion correct             | 0.62        |
| <b>Kappa</b>                   | <b>0.23</b> |
| True Skill Statistic           | 0.23        |

**Summary:** The European rabbit’s bioclimatic envelope is predicted to increase by 30% with a ~2° mean latitudinal polewards shift and a mean decrease in elevation of ~10m. 95% of the permutation importance of the model was contributed to by annual evapotranspiration (21.1%), mean annual temperature (19.0%), minimum temperature (13.9%), annual water balance (12.3%), mean annual precipitation (11.2%), human influence index (9.8%), precipitation seasonality (7.6%) and normalised difference vegetation index (2.9%).

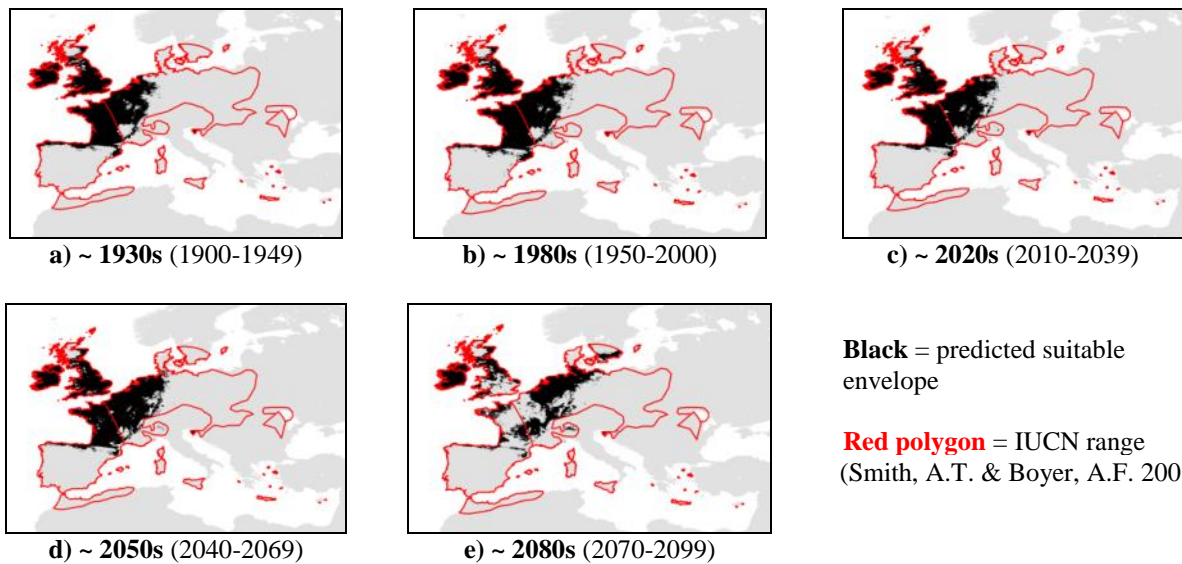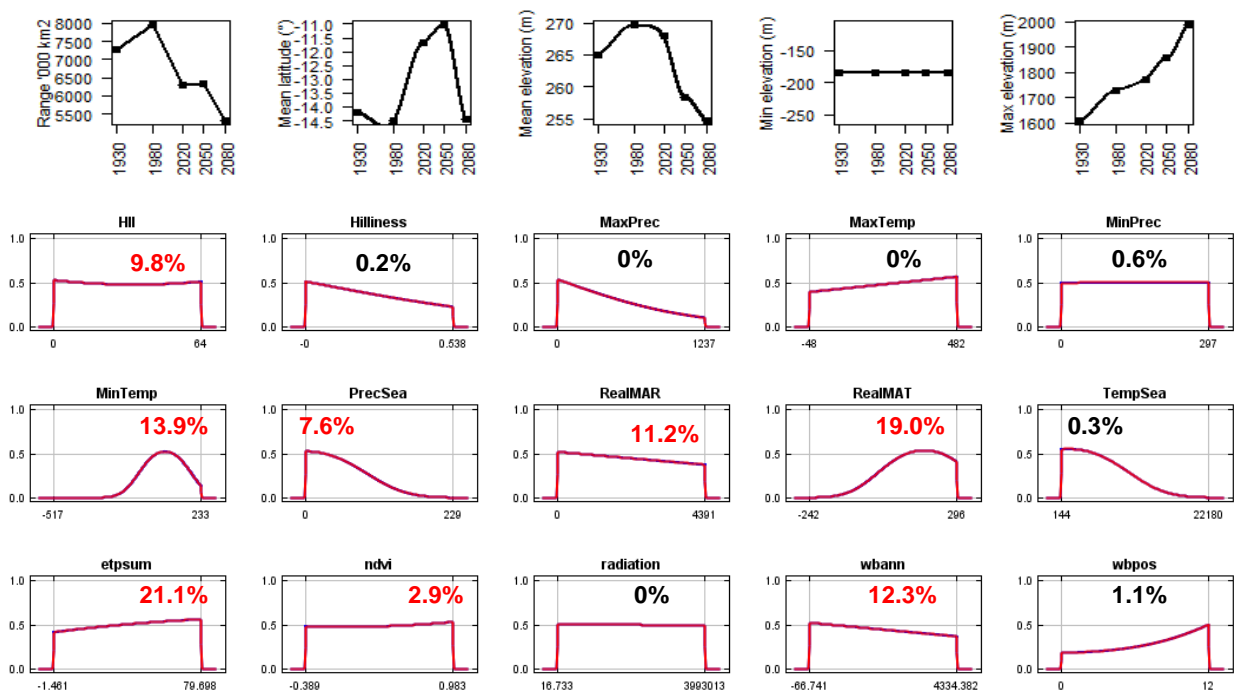



**#66 – Amami rabbit (*Pentalagus furnessi*)**

*n* = 9

**Expert:** Fumio Yamada, Forestry and Forest Products Research Institute, Japan

**Expert evaluation:** Good

**Data:** Modern and historic

**Envelope:** Climatic and habitat

**Dispersal distance:** 0.01km/year (Expert)

**Status:** MODELLABLE; **Included in final analysis:** √

| Model evaluation metric |             |
|-------------------------|-------------|
| AUC                     | 0.99        |
| Omission rate           | 0.00        |
| Sensitivity             | 0.99        |
| Specificity             | 0.99        |
| Proportion correct      | 0.99        |
| <b>Kappa</b>            | <b>0.95</b> |
| True Skill Statistic    | 0.99        |

**Summary:** The Amami rabbit’s bioclimatic envelope is predicted to increase by 150% with a ~1° mean latitudinal shift towards the Equator and a mean decrease in elevation of ~25m. 95% of the permutation importance of the model was contributed to by minimum temperature (97.3%), temperature seasonality (1.7%) and annual evapotranspiration (0.8%).

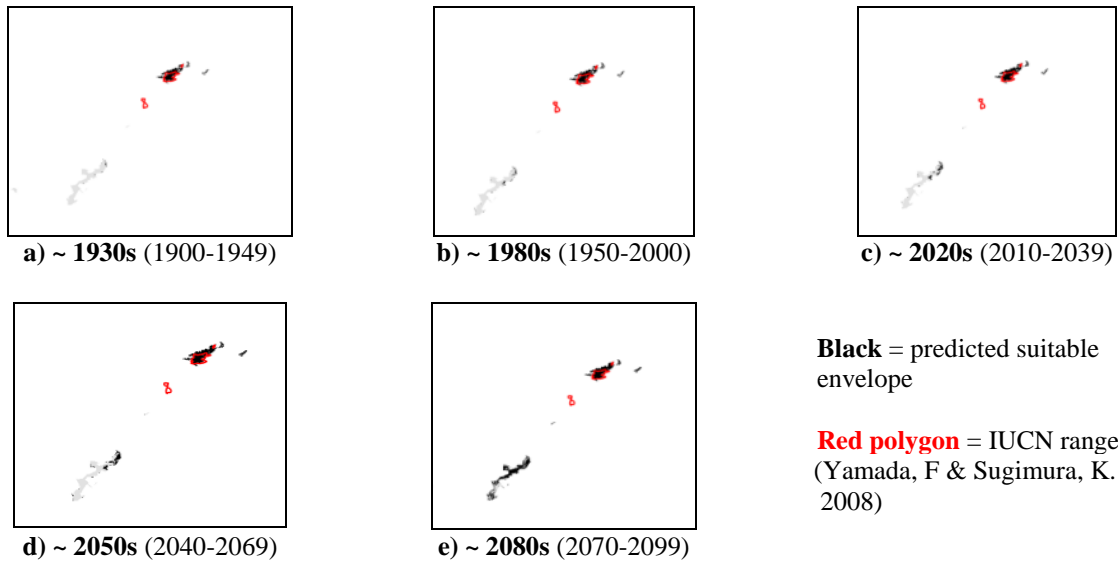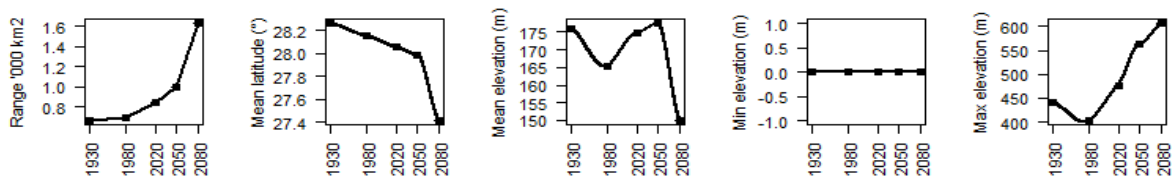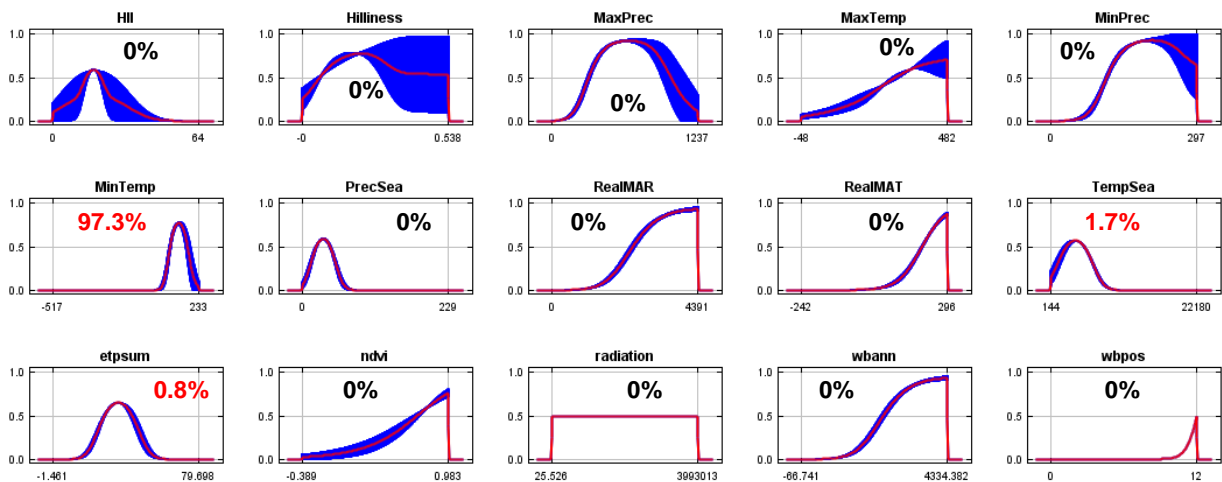

**#67 – Bunyoro rabbit (*Poelagus marjorita*)**

*n* = 8

**Expert:** David Happold, Australian National University

**Expert evaluation:** Poor

**Data:** Only modern

**Envelope:** Climatic and habitat

**Dispersal distance:** 2km/year (Similar ecology to *Pronolagus* sp.)

**Status:** UNMODELLABLE; **Included in final analysis:** X

| Model evaluation metric |             |
|-------------------------|-------------|
| AUC                     | 0.99        |
| Omission rate           | 0.00        |
| Sensitivity             | 1.00        |
| Specificity             | 0.99        |
| Proportion correct      | 0.99        |
| <b>Kappa</b>            | <b>0.89</b> |
| True Skill Statistic    | 0.99        |

**Summary:** The Bunyoro rabbit’s bioclimatic envelope is predicted to decrease by 90% with a ~1° mean latitudinal shift towards the Equator and a mean increase in elevation of ~200m driven by an increase in minimum elevation.. 95% of the permutation importance of the model was contributed to by annual evapotranspiration (61.7%), temperature seasonality (31.4%) and number of months with a positive water balance (6.3%).

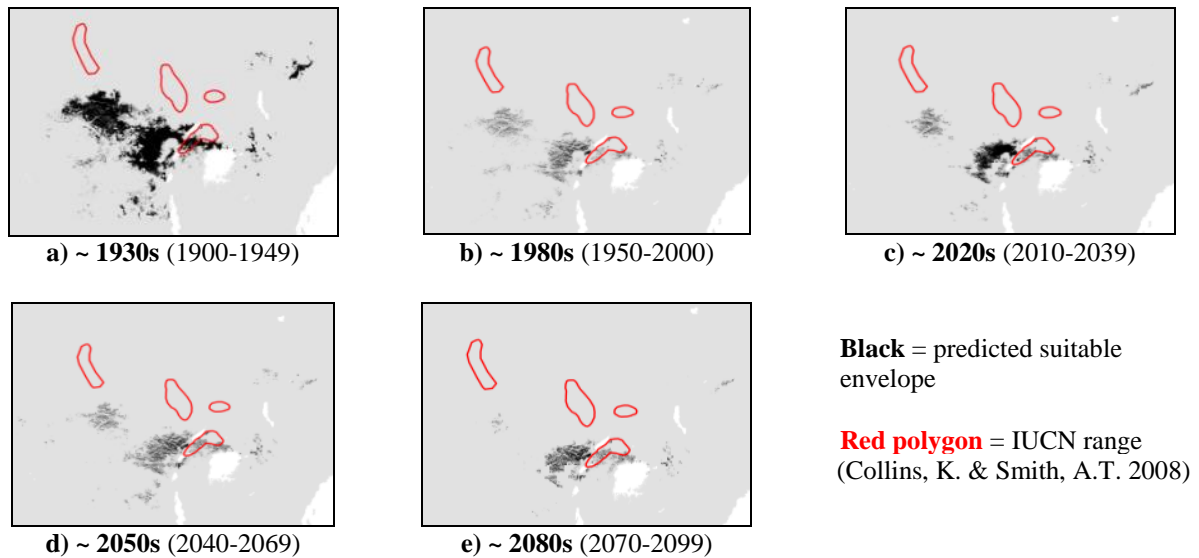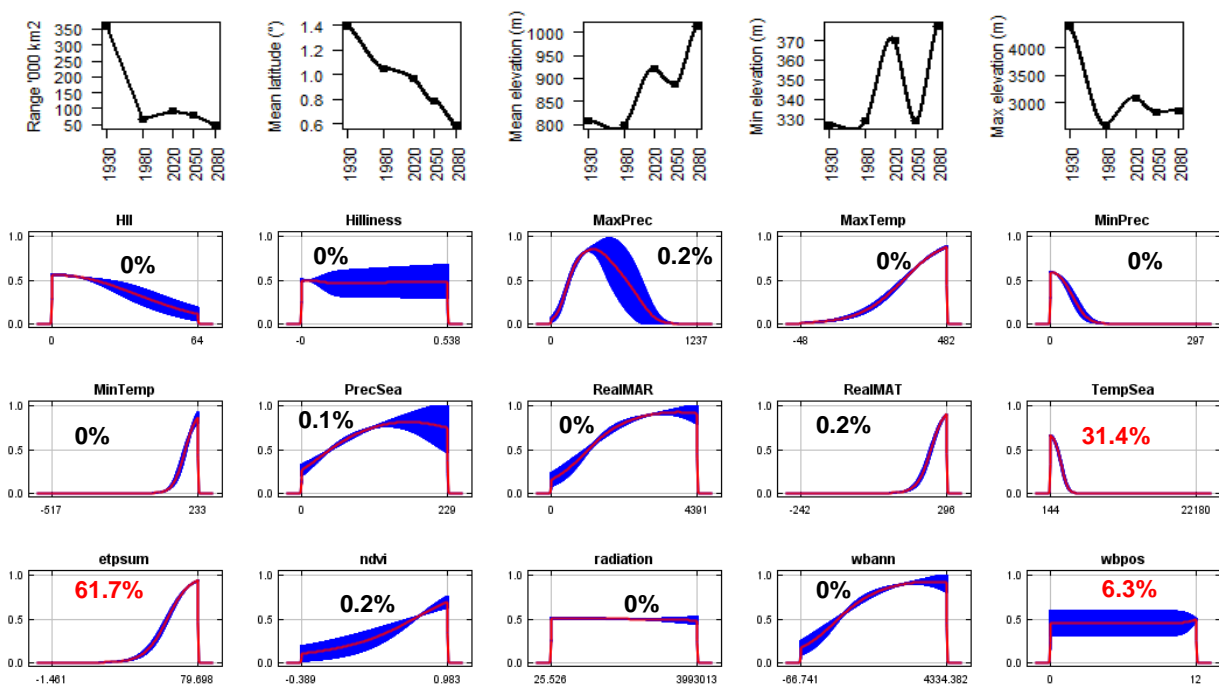

**#68 – Greater red rock hare (*Pronolagus crassicaudatus*)**

*n* = 7

**Expert:** Kai Collins, University of Pretoria

**Expert evaluation:** Poor

**Data:** Only modern

**Envelope:** Climatic and habitat

**Dispersal distance:** 2km/year (Similar ecology to *P.randensis*)

**Status:** UNMODELLABLE; **Included in final analysis:** X

| Model evaluation metric |             |
|-------------------------|-------------|
| AUC                     | 0.99        |
| Omission rate           | 0.00        |
| Sensitivity             | 1.00        |
| Specificity             | 0.98        |
| Proportion correct      | 0.98        |
| <b>Kappa</b>            | <b>0.06</b> |
| True Skill Statistic    | 0.98        |

**Summary:** The Greater red rock hare's bioclimatic envelope is predicted to decrease by 65% with a ~3° mean latitudinal polewards shift and a mean decrease in elevation of ~20m driven by a decrease in maximum elevation. 95% of the permutation importance of the model was contributed to by human influence index (31.7%), temperature seasonality (29.3%) solar radiation (16.9%) and minimum precipitation (18.3%).

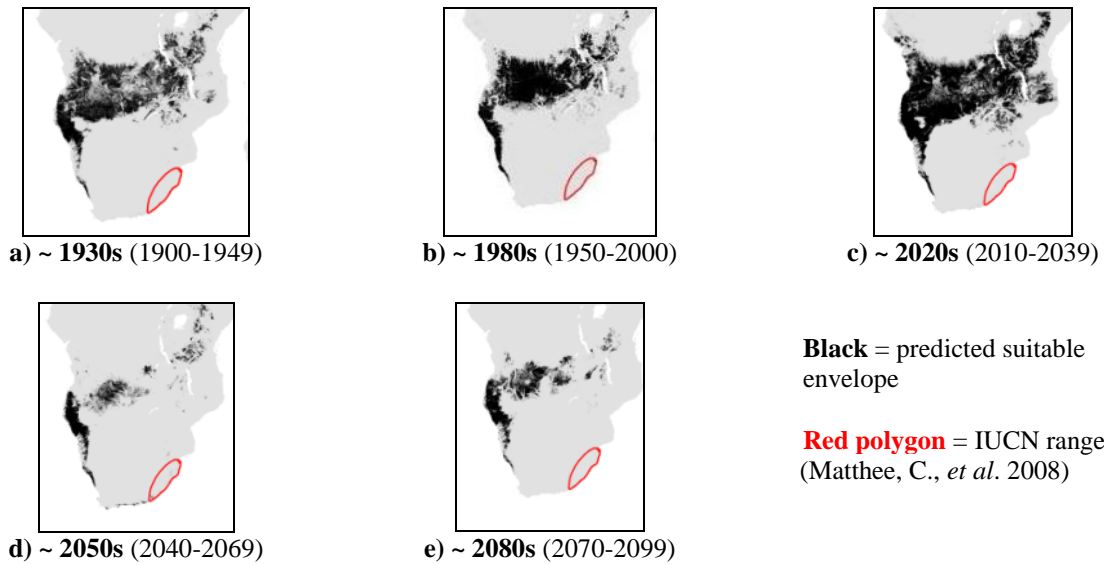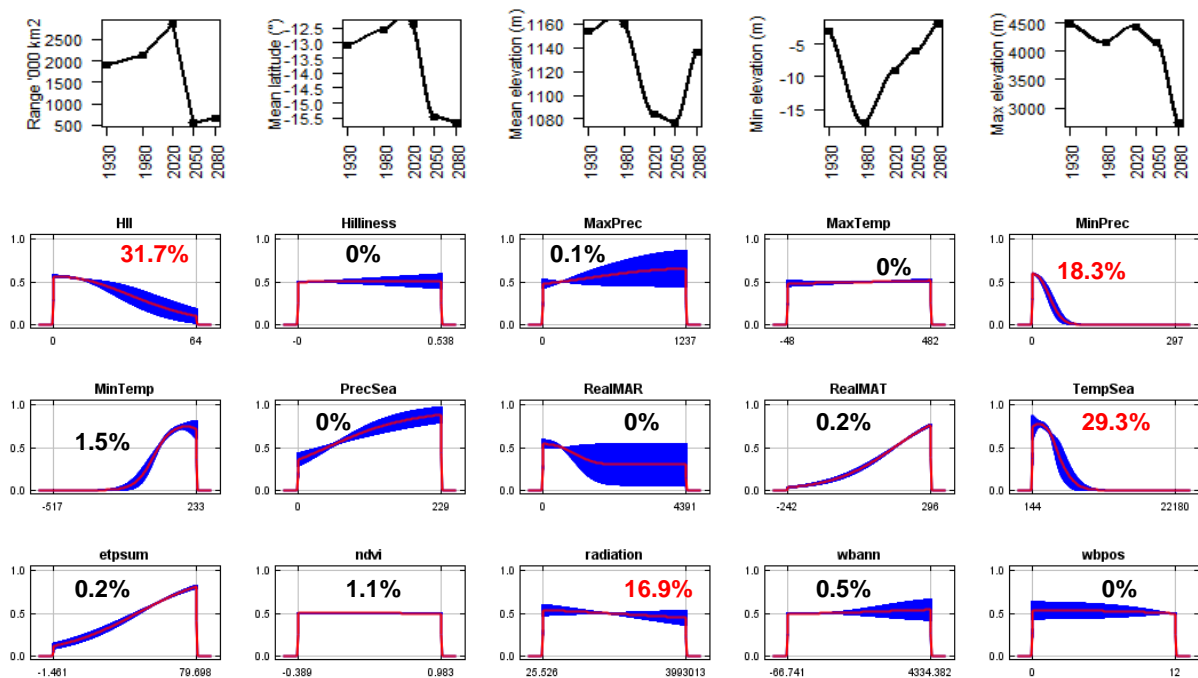

**#69 – Jameson’s red rock hare (*Pronolagus randensis*)**

*n* = 27

**Expert:** Kai Collins, University of Pretoria

**Expert evaluation:** Poor

**Data:** Modern and historic

**Envelope:** Climatic and habitat

**Dispersal distance:** 2km/year (Expert)

**Status:** UNMODELLABLE; **Included in final analysis:** X

| Model evaluation metric |             |
|-------------------------|-------------|
| AUC                     | 0.98        |
| Omission rate           | 0.04        |
| Sensitivity             | 0.96        |
| Specificity             | 0.99        |
| Proportion correct      | 0.99        |
| <b>Kappa</b>            | <b>0.55</b> |
| True Skill Statistic    | 0.96        |

**Summary:** The Jameson’s red rock hare’s bioclimatic envelope is predicted to decrease by 70% with a ~5° mean latitudinal polewards shift and a mean increase in elevation of ~325m driven by an increase in maximum and minimum elevation. 95% of the permutation importance of the model was contributed to by mean annual temperature (46.2%), maximum temperature (23.3%), minimum precipitation (16.3%), minimum temperature (7.0%) and temperature seasonality (1.4%).

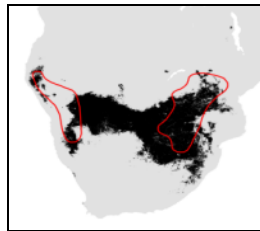

a) ~ 1930s (1900-1949)

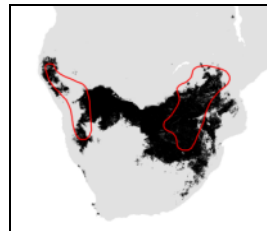

b) ~ 1980s (1950-2000)

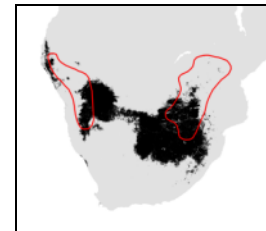

c) ~ 2020s (2010-2039)

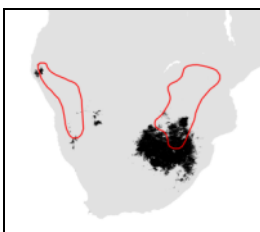

d) ~ 2050s (2040-2069)

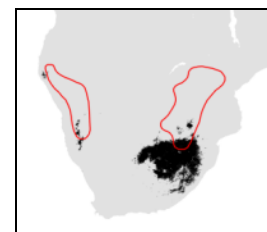

e) ~ 2080s (2070-2099)

**Black** = predicted suitable envelope

**Red polygon** = IUCN range (Matthee, C., *et al.* 2008)

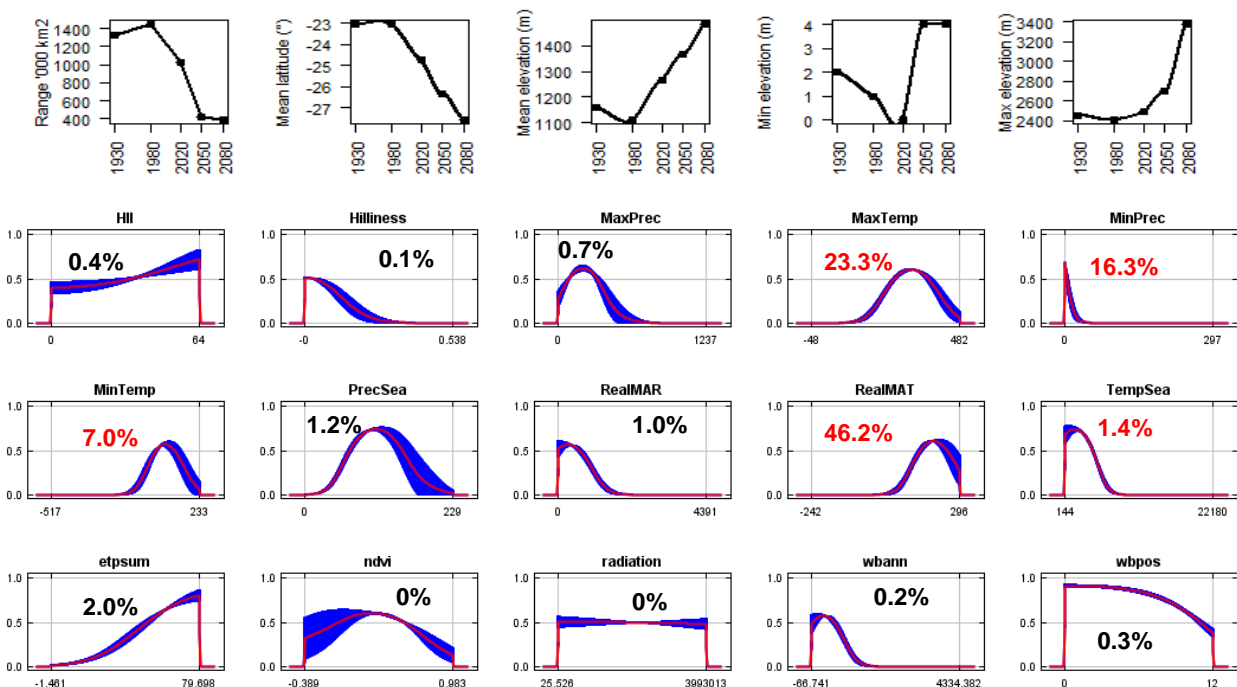

**#70 – Smith’s red rock hare (*Pronolagus rupestris*)**

*n* = 9

**Expert:** Kai Collins, University of Pretoria

**Expert evaluation:** Poor

**Data:** Modern and historic

**Envelope:** Climatic and habitat

**Dispersal distance:** 2km/year (Similar ecology to *P.randensis*)

**Status:** UNMODELLABLE; **Included in final analysis:** X

| <b>Model evaluation metric</b> |             |
|--------------------------------|-------------|
| AUC                            | 0.99        |
| Omission rate                  | 0.00        |
| Sensitivity                    | 1.00        |
| Specificity                    | 0.98        |
| Proportion correct             | 0.98        |
| <b>Kappa</b>                   | <b>0.07</b> |
| True Skill Statistic           | 0.98        |

**Summary:** The Smith’s red rock hare’s bioclimatic envelope is predicted to decrease by 60% with a ~5° mean latitudinal polewards shift and a mean decrease in elevation of ~60m. 95% of the permutation importance of the model was contributed to by temperature seasonality (44.0%), minimum precipitation (18.5%), mean annual precipitation (18.3%), normalised difference vegetation index (6.3%), human influence index (5.2%) and minimum temperature (3.4%).

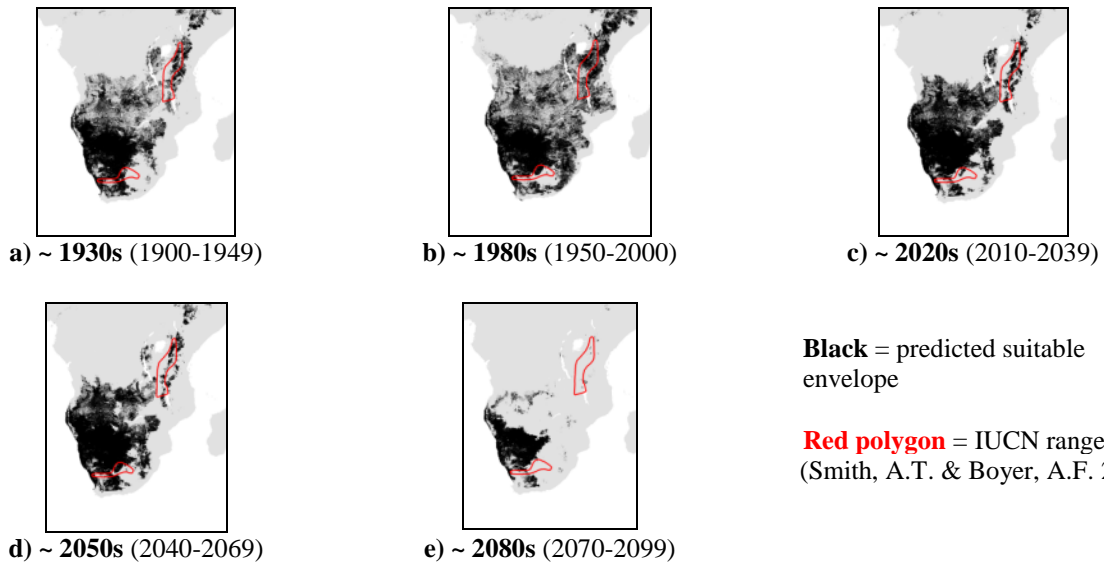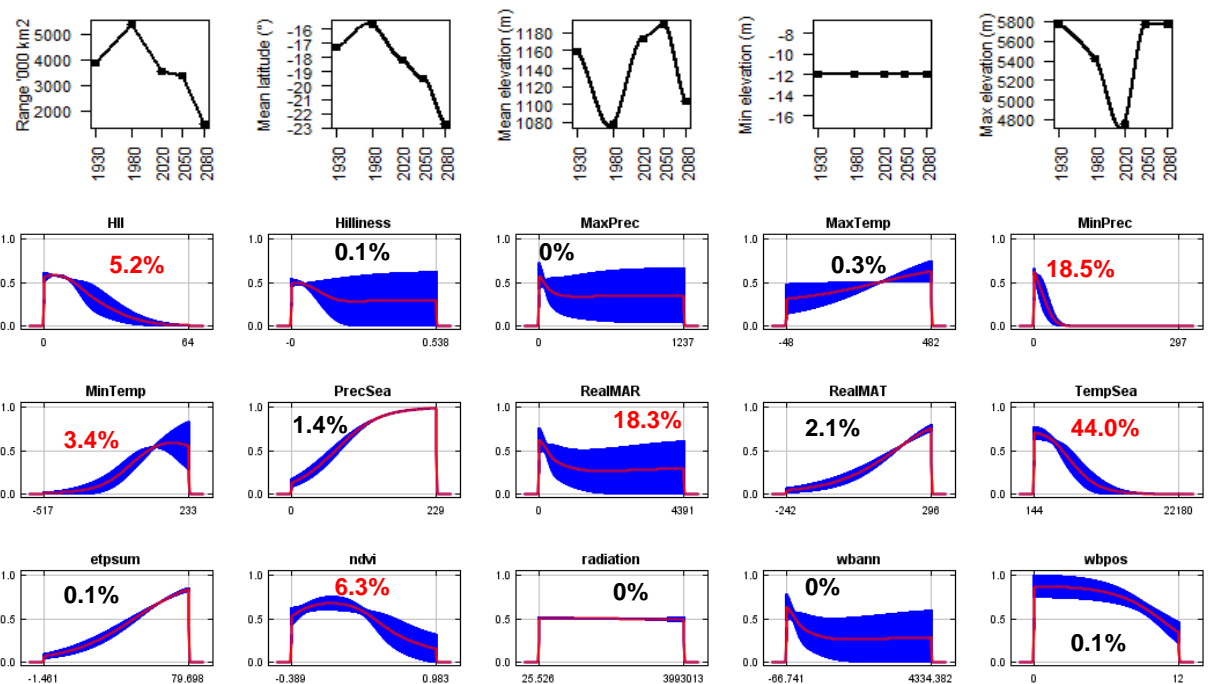



**#71 – Hewitt’s red rock hare (*Pronolagus saundersiae*)**

*n* = 9

**Expert:** Kai Collins, University of Pretoria

**Expert evaluation:** Poor

**Data:** Modern and historic

**Envelope:** Climatic and habitat

**Dispersal distance:** 2km/year (Similar ecology to *P.randensis*)

**Status:** UNMODELLABLE; **Included in final analysis:** X

| Model evaluation metric |             |
|-------------------------|-------------|
| AUC                     | 1.00        |
| Omission rate           | 0.00        |
| Sensitivity             | 1.00        |
| Specificity             | 1.00        |
| Proportion correct      | 1.00        |
| <b>Kappa</b>            | <b>1.00</b> |
| True Skill Statistic    | 1.00        |

**Summary:** The Hewitt’s red rock hare’s bioclimatic envelope is predicted to decrease by 100% with a ~1° mean latitudinal polewards shift and a mean increase in elevation of ~15m driven by an increase in minimum elevation. 95% of the permutation importance of the model was contributed to by temperature seasonality (28.7%), precipitation seasonality (24.3%), maximum temperature (18.0%), annual evapotranspiration (16.0%), human influence index (5.6%), minimum temperature (1.9%) and minimum precipitation (1.6%).

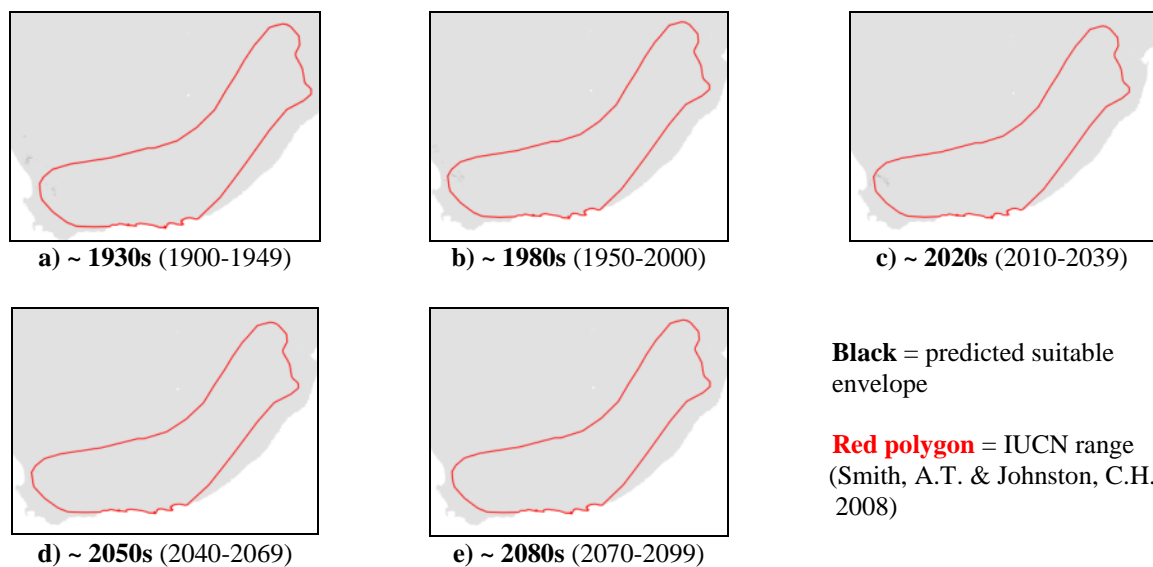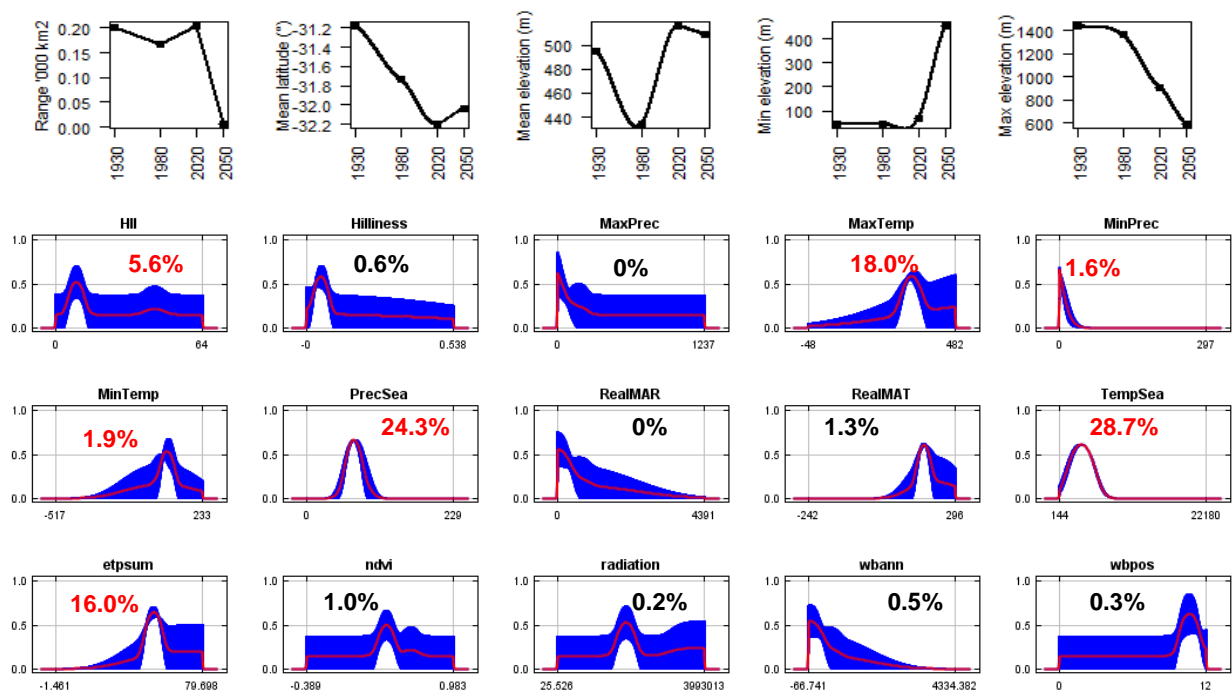

**#72 – Volcano rabbit (*Romerolagus diazi*)**

*n* = 31

**Expert:** Jose Antonio Martinez-Garcia, Universidad Autónoma Metropolitana, Mexico

**Expert evaluation:** Poor

**Data:** Only modern

**Envelope:** Climatic and habitat

**Dispersal distance:** 0.01km/year (Island species, range 0.01-0.01)

**Status:** UNMODELLABLE; **Included in final analysis:** X

| Model evaluation metric |             |
|-------------------------|-------------|
| AUC                     | 0.95        |
| Omission rate           | 0.10        |
| Sensitivity             | 0.90        |
| Specificity             | 0.99        |
| Proportion correct      | 0.99        |
| <b>Kappa</b>            | <b>0.79</b> |
| True Skill Statistic    | 0.90        |

**Summary:** The Volcano rabbit’s bioclimatic envelope is predicted to decrease by 100% with a ~0.2° mean latitudinal polewards shift and a mean increase in elevation of ~1500m driven by increases in minimum and maximum elevation. 95% of the permutation importance of the model was contributed to by temperature seasonality (75.2%), precipitation seasonality (16.2%) and minimum temperature (6.8%).

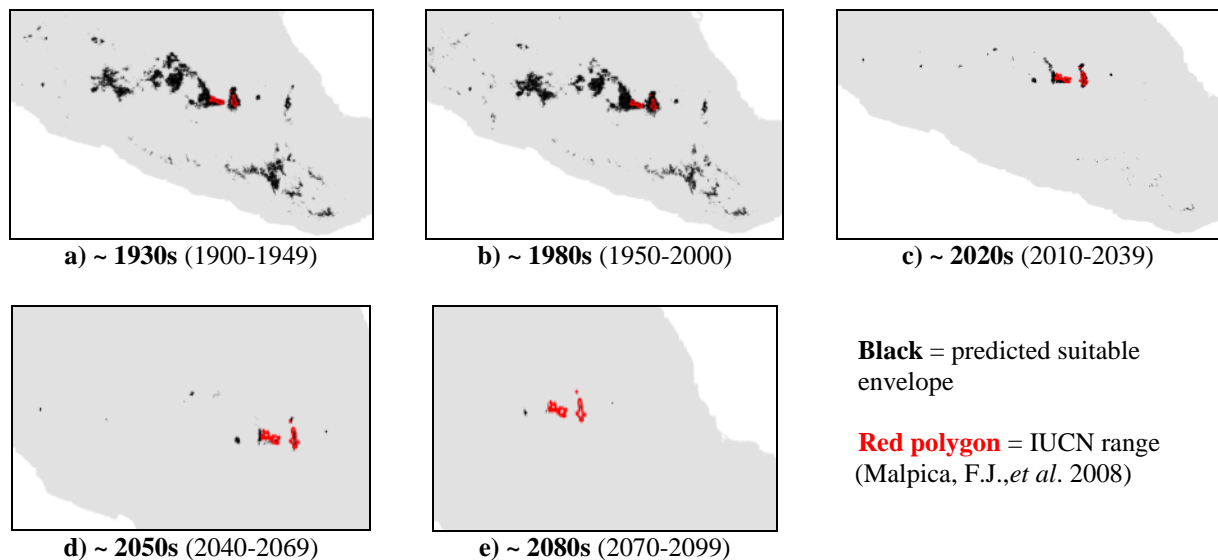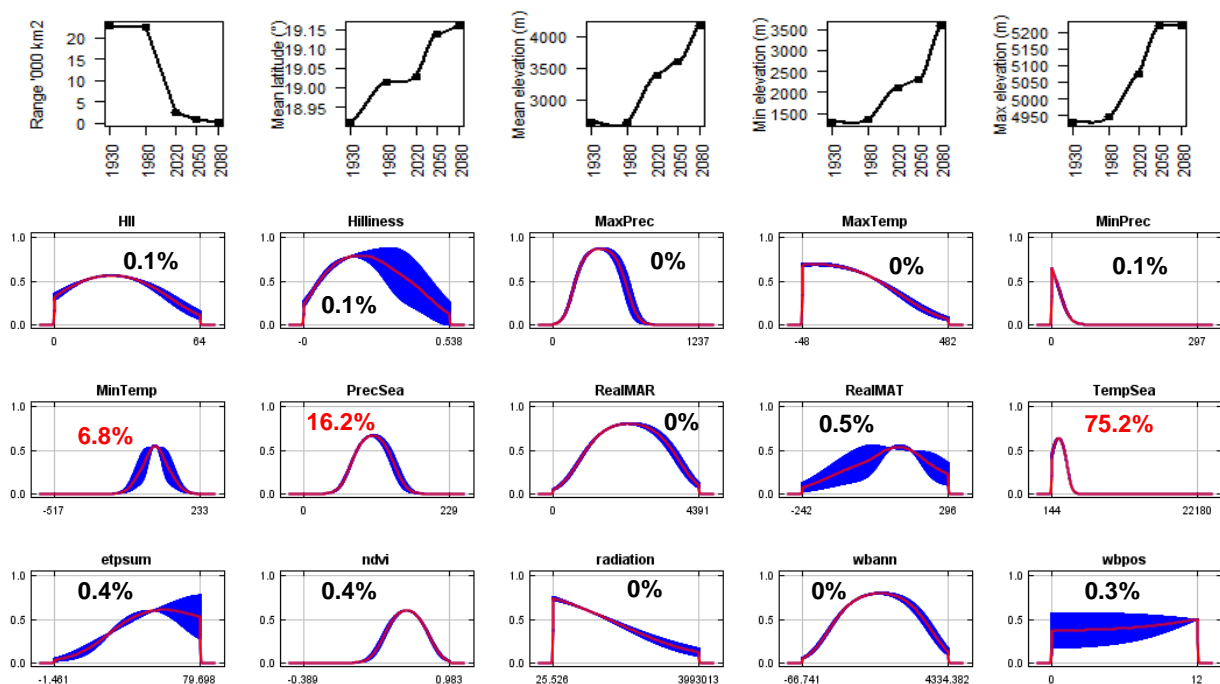

**#73 – Swamp rabbit (*Sylvilagus aquaticus*)**

*n* = 66

**Expert:** Robert Kissell, Memphis State University

**Expert evaluation:** Medium

**Data:** Modern and historic

**Envelope:** Climatic and habitat

**Dispersal distance:** 25km/year (Expert)

**Status:** MODELLABLE; **Included in final analysis:** ✓

| Model evaluation metric |             |
|-------------------------|-------------|
| AUC                     | 0.95        |
| Omission rate           | 0.09        |
| Sensitivity             | 0.91        |
| Specificity             | 0.99        |
| Proportion correct      | 0.99        |
| <b>Kappa</b>            | <b>0.76</b> |
| True Skill Statistic    | 0.91        |

**Summary:** The Swamp rabbit’s bioclimatic envelope is predicted to increase by 200% with a ~2° mean latitudinal polewards shift and a mean increase in elevation of ~60m driven by an increase in maximum elevation. 95% of the permutation importance of the model was contributed to by temperature seasonality (38.1%), mean annual temperature (36.7%), mean annual precipitation (12.7%), precipitation seasonality (4.7%) and minimum precipitation (3.6%).

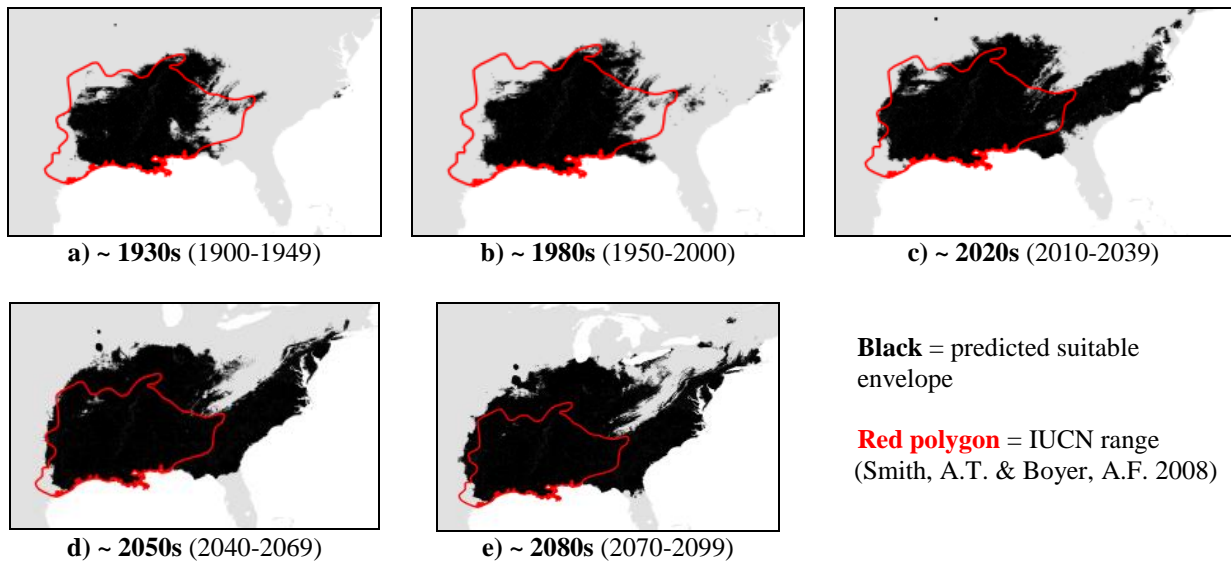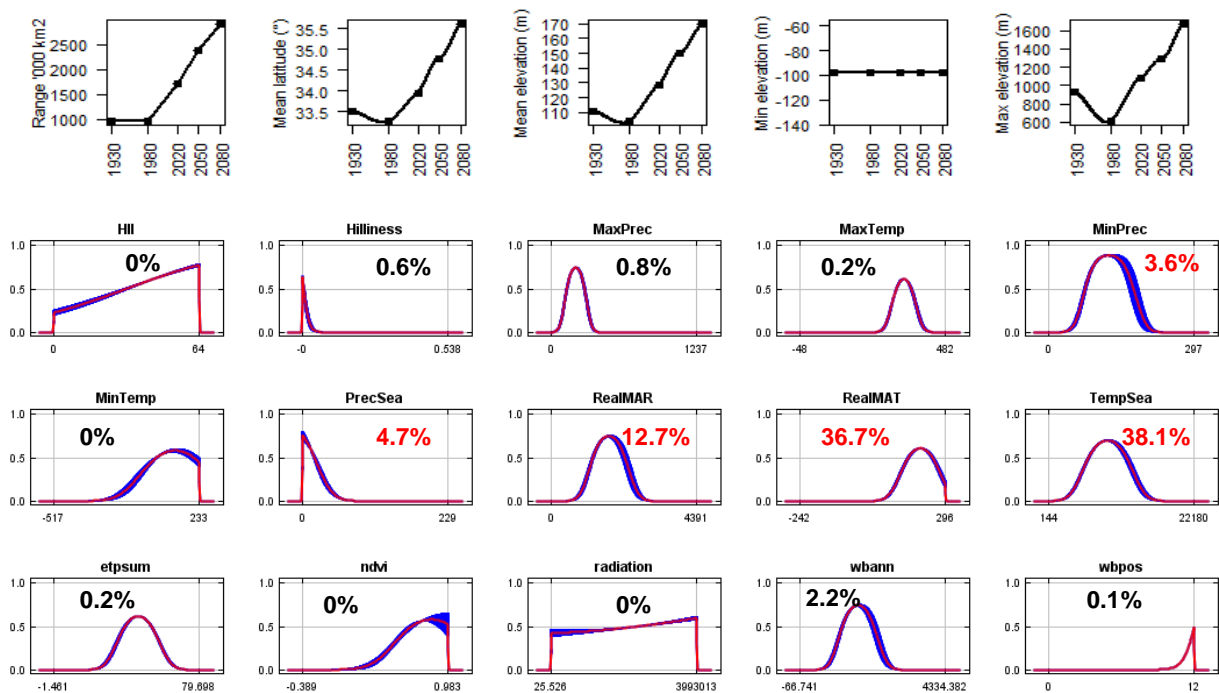

**#74 – Desert cottontail (*Sylvilagus audubonii*)**

*n* = 1040

**Expert:** Consuelo Lorenzo, Departamento Conservación de la Biodiversidad, Chiapas

**Expert evaluation:** Medium

**Data:** Modern and historic

**Envelope:** Climatic and habitat

**Dispersal distance:** 7.5km/year (Similar ecology to *S.palustris*)

**Status:** MODELLABLE; **Included in final analysis:** √

| <b>Model evaluation metric</b> |             |
|--------------------------------|-------------|
| AUC                            | 0.94        |
| Omission rate                  | 0.08        |
| Sensitivity                    | 0.92        |
| Specificity                    | 0.96        |
| Proportion correct             | 0.96        |
| <b>Kappa</b>                   | <b>0.78</b> |
| True Skill Statistic           | 0.88        |

**Summary:** The Desert cottontail’s bioclimatic envelope is predicted to increase by 5% with a ~1° mean latitudinal polewards shift and a mean increase in elevation of ~30m driven by an increase in minimum elevation. 95% of the permutation importance of the model was contributed to by precipitation seasonality (36.6%), annual evapotranspiration (27.1%), mean annual temperature (13.6%), minimum temperature (9.1%), maximum temperature (3.0%), annual water balance (2.1%), minimum precipitation (1.9%) and human influence index (1.7%).

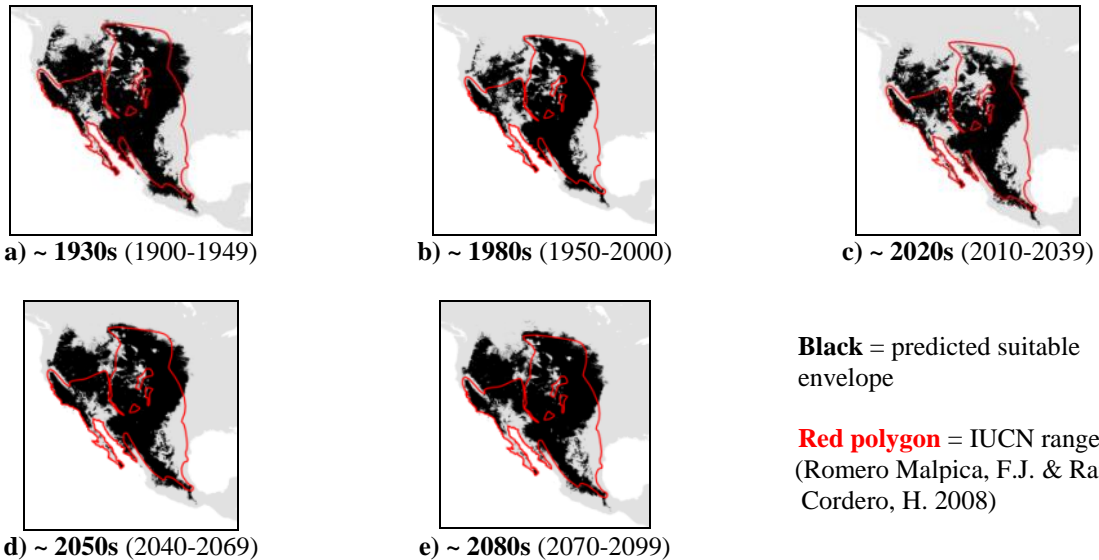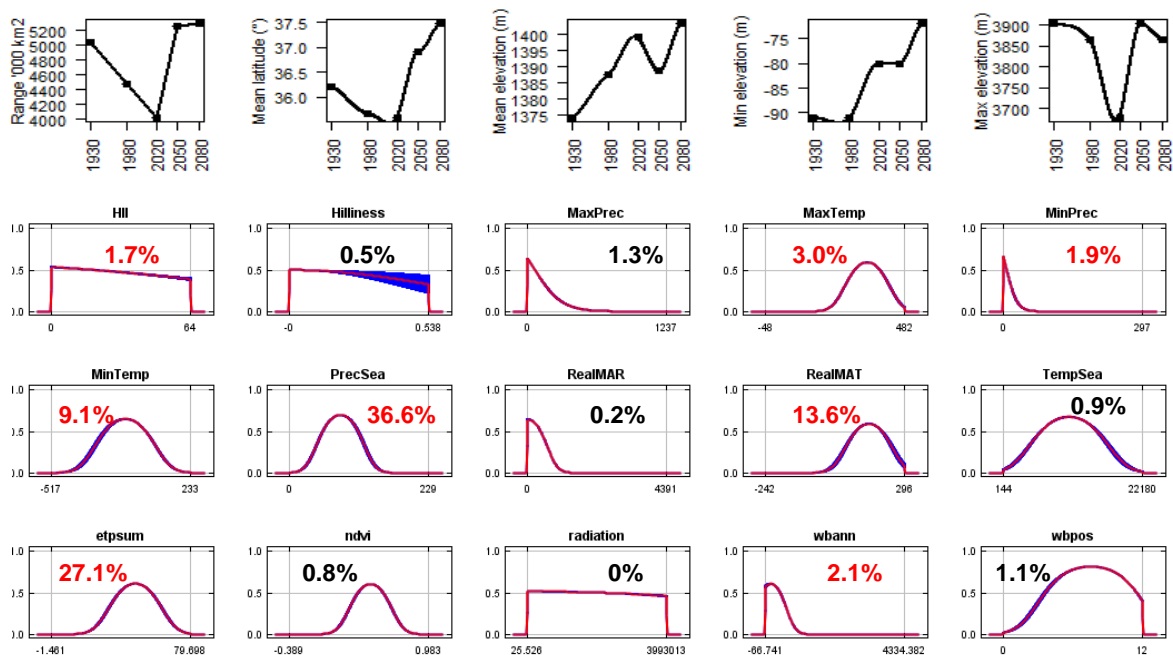

**#75 – Brush rabbit (*Sylvilagus bachmani*)**

*n* = 263

**Expert:** Consuelo Lorenzo, Departamento Conservación de la Biodiversidad, Chiapas

**Expert evaluation:** Medium

**Data:** Modern and historic

**Envelope:** Climatic and habitat

**Dispersal distance:** 3km/year (Similar ecology to *S.transitionalis*)

**Status:** MODELLABLE; **Included in final analysis:** √

| Model evaluation metric |             |
|-------------------------|-------------|
| AUC                     | 0.96        |
| Omission rate           | 0.08        |
| Sensitivity             | 0.92        |
| Specificity             | 0.99        |
| Proportion correct      | 0.99        |
| <b>Kappa</b>            | <b>0.89</b> |
| True Skill Statistic    | 0.91        |

**Summary:** The Brush rabbit's bioclimatic envelope is predicted to decrease by 15% with a ~3° mean latitudinal polewards shift and a mean decrease in elevation of ~10m. 95% of the permutation importance of the model was contributed to by mean annual temperature (31.5%), minimum precipitation (24.5%), precipitation seasonality (14.4%), mean annual precipitation (7.1%), annual water balance (6.4%), minimum temperature (5.1%), normalised difference vegetation index (4.1%) and temperature seasonality (2.7%).

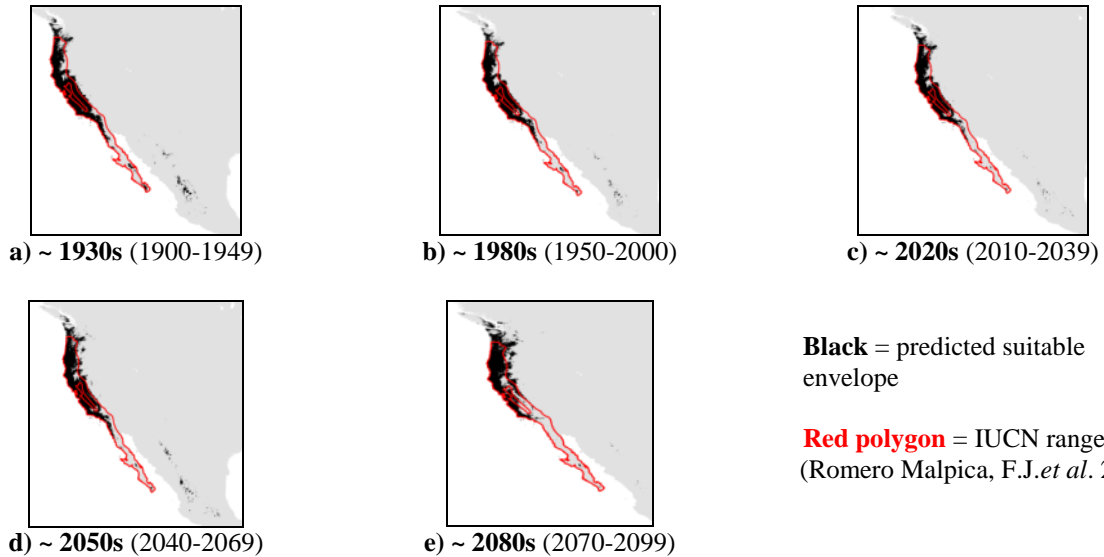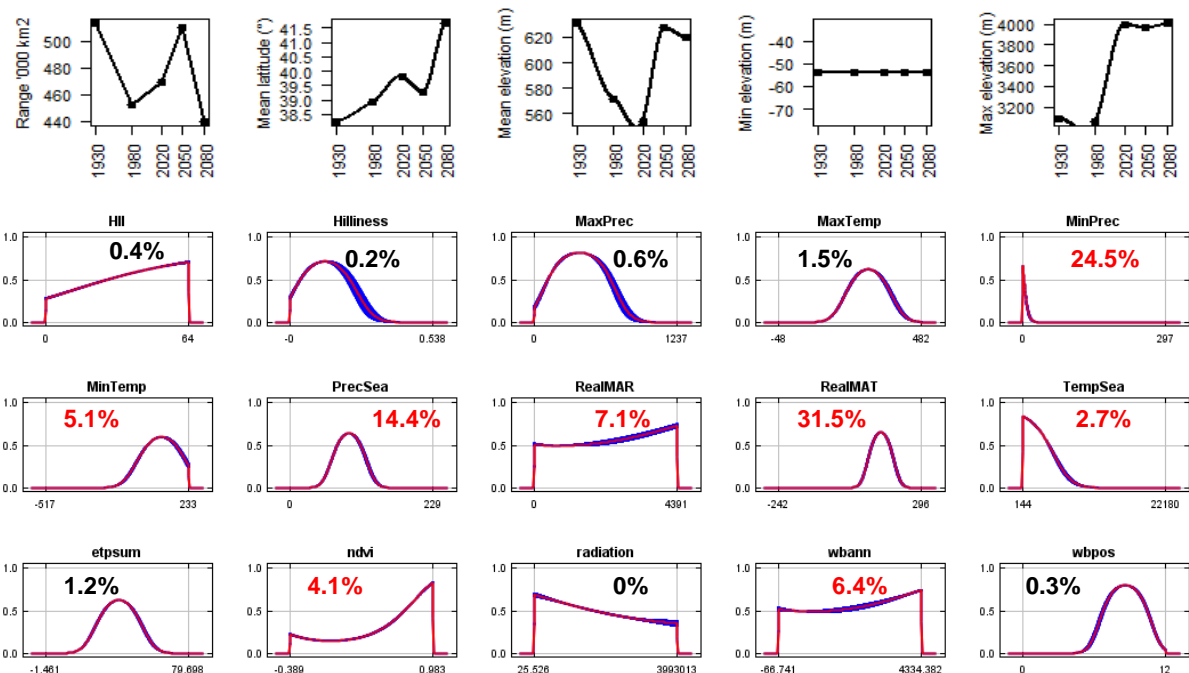



**#76 – Forest rabbit (*Sylvilagus brasiliensis*)**

*n* = 181

**Expert:** Jorge Salazar-Bravo, Texas Tech University

**Expert evaluation:** Medium

**Data:** Modern and historic

**Envelope:** Climatic and habitat

**Dispersal distance:** 7.5km/year (Similar ecology to *S.palustris*)

**Status:** MODELLABLE; **Included in final analysis:** √

| Model evaluation metric |             |
|-------------------------|-------------|
| AUC                     | 0.95        |
| Omission rate           | 0.10        |
| Sensitivity             | 0.90        |
| Specificity             | 0.99        |
| Proportion correct      | 0.99        |
| <b>Kappa</b>            | <b>0.73</b> |
| True Skill Statistic    | 0.89        |

**Summary:** The Forest rabbit’s bioclimatic envelope is predicted to decrease by 50% with a ~6° mean latitudinal polewards shift and a mean increase in elevation of ~210m driven by an increase in minimum elevation. 95% of the permutation importance of the model was contributed to by annual evapotranspiration (71.4%), temperature seasonality (11.6%), normalised difference vegetation index (4.9%) and minimum temperature (4.6%).

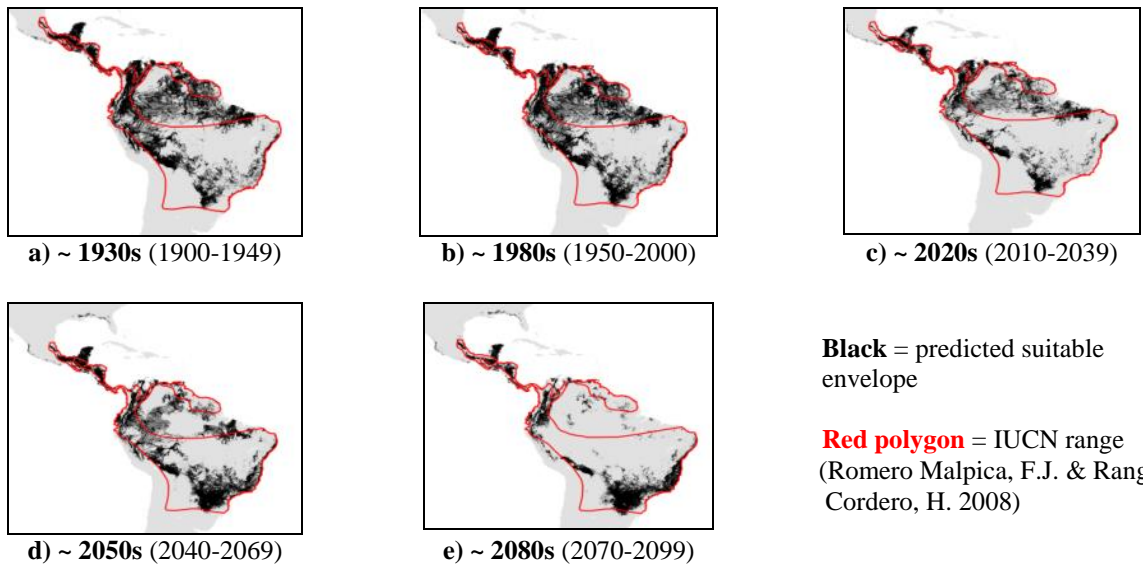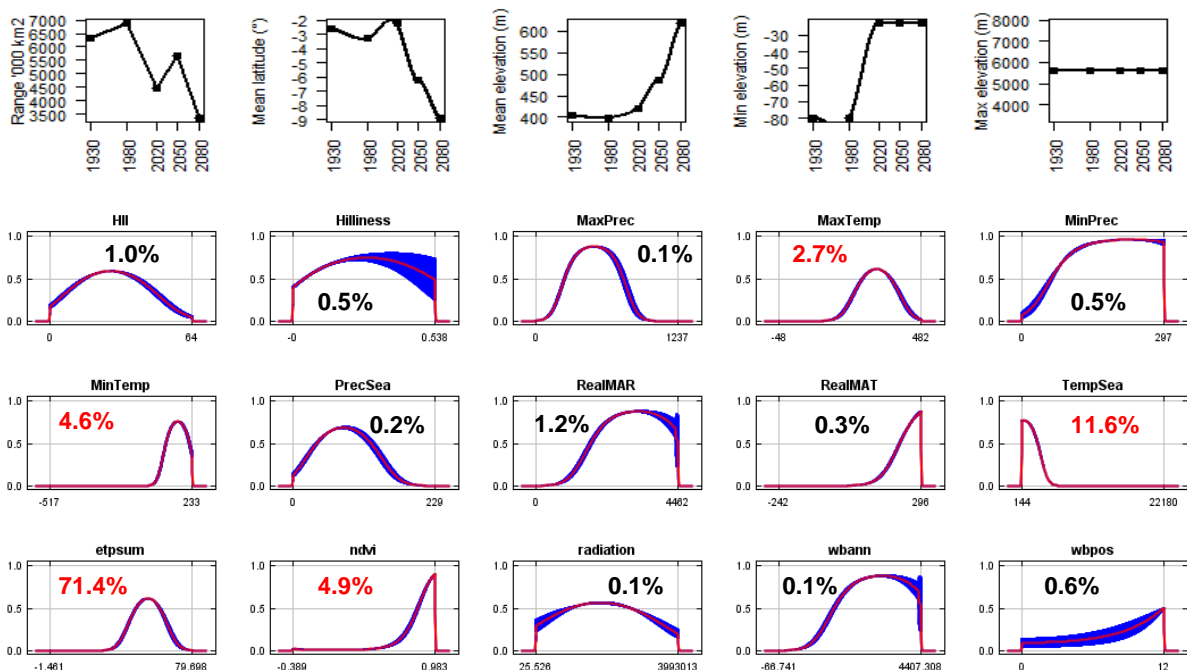

**#77 – Manzano mountain cottontail (*Sylvilagus cognatus*)**

*n* = 7

**Expert:** Jennifer Frey, New Mexico State University

**Expert evaluation:** Medium

**Data:** Modern and historic

**Envelope:** Climatic and habitat

**Dispersal distance:** 0.01km/year (Similar ecology to *R.diazi*)

**Status:** MODELLABLE; **Included in final analysis:** √

| Model evaluation metric |             |
|-------------------------|-------------|
| AUC                     | 0.99        |
| Omission rate           | 0.00        |
| Sensitivity             | 1.00        |
| Specificity             | 0.99        |
| Proportion correct      | 0.99        |
| <b>Kappa</b>            | <b>0.52</b> |
| True Skill Statistic    | 0.99        |

**Summary:** The Manzano mountain cottontail’s bioclimatic envelope is predicted to decrease by 90% with a ~2° mean latitudinal polewards shift and a mean increase in elevation of ~230m driven by an increase in minimum elevation. 95% of the permutation importance of the model was contributed to by annual water balance (40.8%), minimum temperature (21.7%), precipitation seasonality (11.3%), mean annual temperature (8.2%), temperature seasonality (6.1%), minimum precipitation (4.3%) and mean annual precipitation (2.6%).

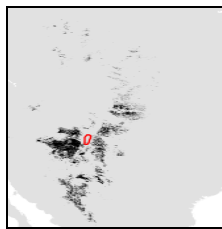

a) ~ 1930s (1900-1949)

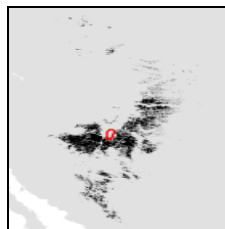

b) ~ 1980s (1950-2000)

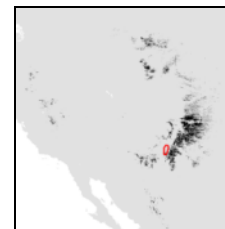

c) ~ 2020s (2010-2039)

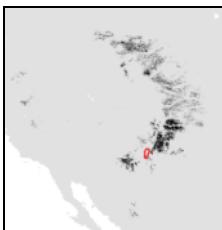

d) ~ 2050s (2040-2069)

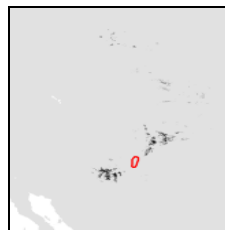

e) ~ 2080s (2070-2099)

**Black** = predicted suitable envelope

**Red polygon** = IUCN range (Smith, A.T. & Boyer, A. F. 2008)

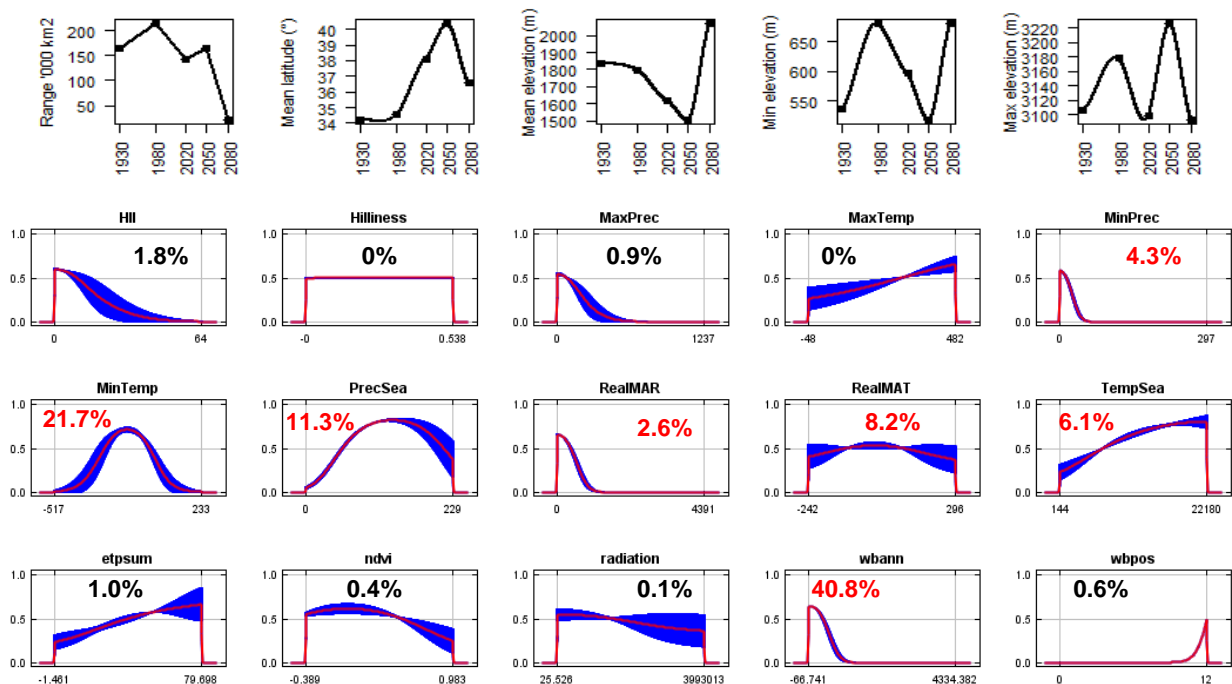

**#78 – Mexican cottontail (*Sylvilagus cunicularius*)**

*n* = 76

**Expert:** Jorge Vazquez, Laboratorio de Ecología del Comportamiento, UAT-UNAM

**Expert evaluation:** Medium

**Data:** Only modern

**Envelope:** Climatic and habitat

**Dispersal distance:** 7.5km/year (Similar ecology to *S.palustris*)

**Status:** MODELLABLE; **Included in final analysis:** ✓

| Model evaluation metric |             |
|-------------------------|-------------|
| AUC                     | 0.95        |
| Omission rate           | 0.10        |
| Sensitivity             | 0.90        |
| Specificity             | 0.99        |
| Proportion correct      | 0.99        |
| <b>Kappa</b>            | <b>0.73</b> |
| True Skill Statistic    | 0.89        |

**Summary:** The Mexican cottontail's bioclimatic envelope is predicted to decrease by 15% with a ~0.5° mean latitudinal polewards shift and a mean increase in elevation of ~200m driven by an increase in minimum elevation. 95% of the permutation importance of the model was contributed to by temperature seasonality (48.3%), precipitation seasonality (42.8%), normalised difference vegetation index (3.5%) and minimum temperature (2.2%).

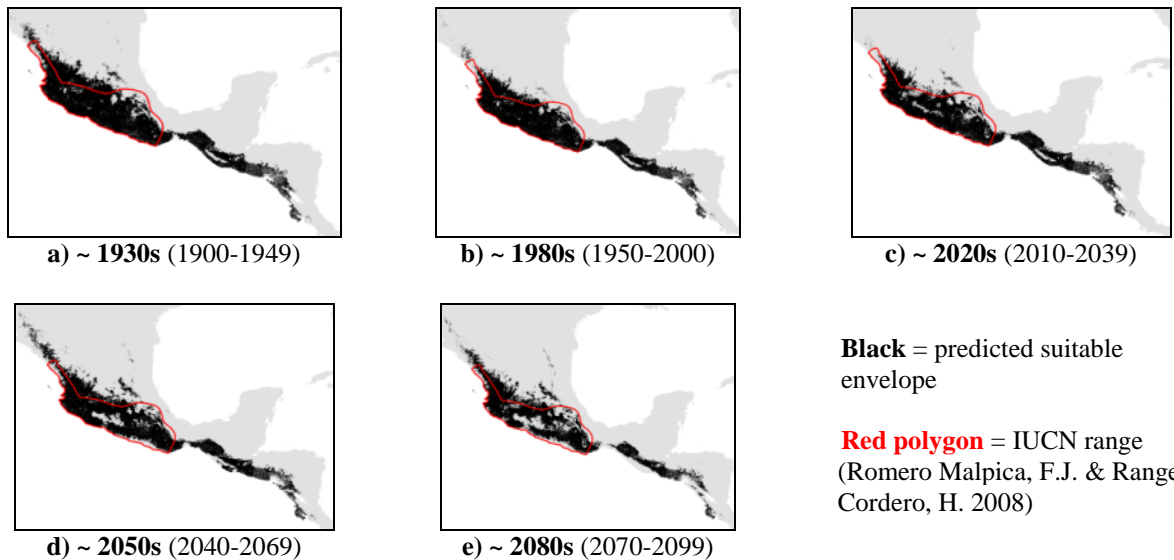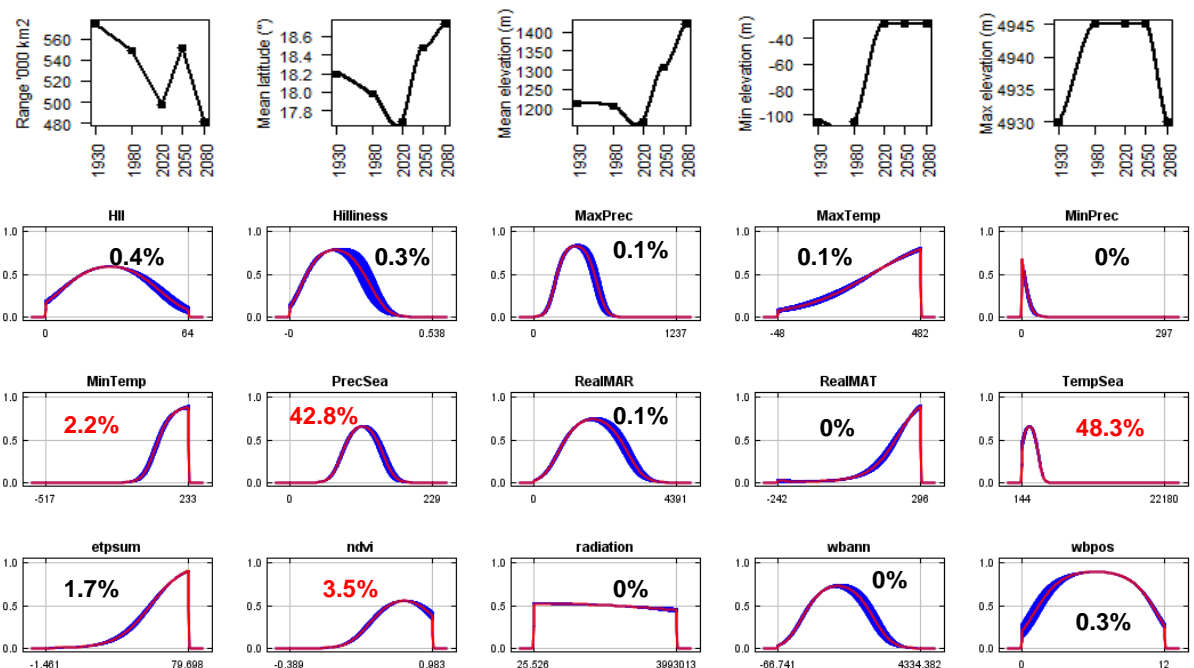

**#79 – Dice’s cottontail (*Sylvilagus dicei*)**

*n* = 8

**Expert:** Jan Schipper, Arizona State University

**Expert evaluation:** Poor

**Data:** Only modern

**Envelope:** Climatic and habitat

**Dispersal distance:** 0.01km/year (Similar ecology to *S.cognatus*)

**Status:** UNMODELLABLE; **Included in final analysis:** X

| Model evaluation metric |             |
|-------------------------|-------------|
| AUC                     | 0.99        |
| Omission rate           | 0.00        |
| Sensitivity             | 1.00        |
| Specificity             | 0.99        |
| Proportion correct      | 0.99        |
| <b>Kappa</b>            | <b>0.73</b> |
| True Skill Statistic    | 0.99        |

**Summary:** The Dice’s cottontail’s bioclimatic envelope is predicted to decrease by 50% with a ~1° mean latitudinal shift towards the Equator and a mean decrease in elevation of ~50m driven by a decrease in maximum elevation. 95% of the permutation importance of the model was contributed to by temperature seasonality (93.7%) and annual water balance (2.6%).

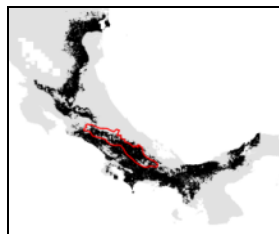

a) ~ 1930s (1900-1949)

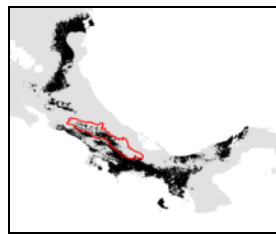

b) ~ 1980s (1950-2000)

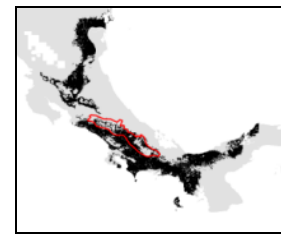

c) ~ 2020s (2010-2039)

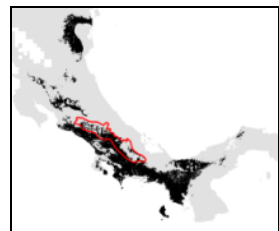

d) ~ 2050s (2040-2069)

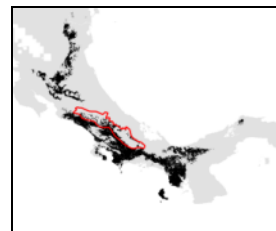

e) ~ 2080s (2070-2099)

**Black** = predicted suitable envelope

**Red polygon** = IUCN range (Smith, A.T. & Boyer, A.F. 2008)

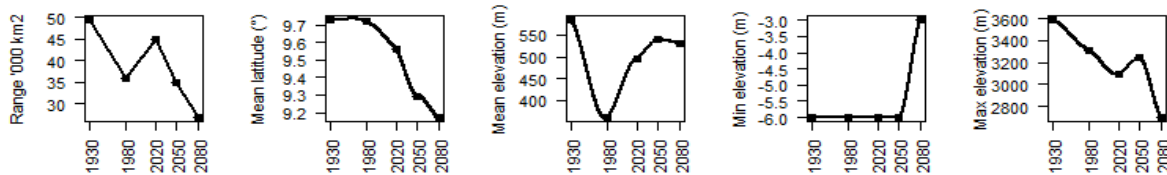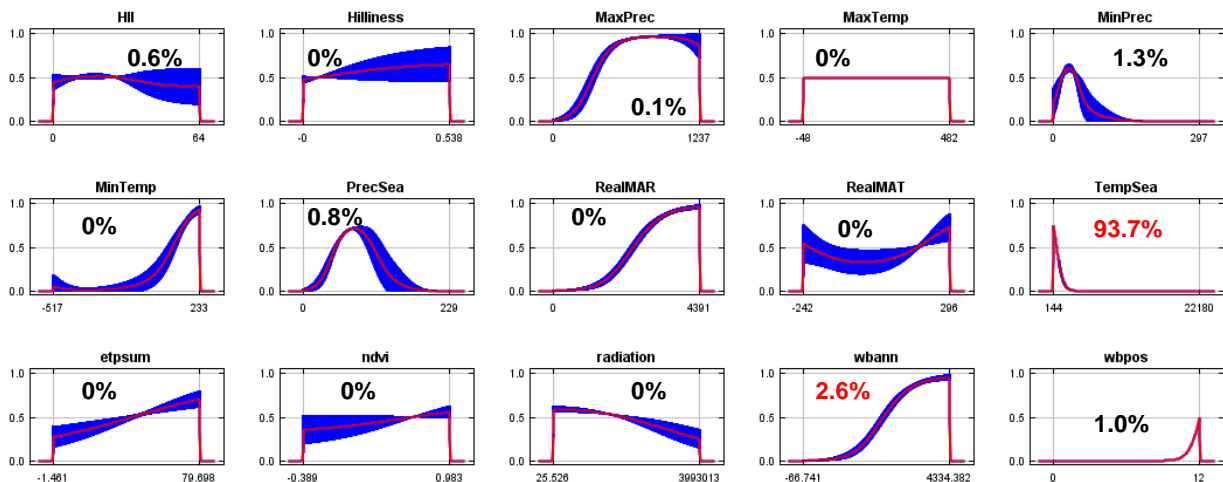

**#80 – Eastern cottontail (*Sylvilagus floridanus*)**

*n* = 1104

**Expert:** Jorge Vazquez, Laboratorio de Ecología del Comportamiento, UAT-UNAM

**Expert evaluation:** Medium

**Data:** Modern and historic

**Envelope:** Climatic and habitat

**Dispersal distance:** 7.5km/year (Similar ecology to *S.palustris*)

**Status:** MODELLABLE; **Included in final analysis:** ✓

| Model evaluation metric |             |
|-------------------------|-------------|
| AUC                     | 0.92        |
| Omission rate           | 0.09        |
| Sensitivity             | 0.91        |
| Specificity             | 0.93        |
| Proportion correct      | 0.93        |
| <b>Kappa</b>            | <b>0.69</b> |
| True Skill Statistic    | 0.84        |

**Summary:** The Eastern cottontail’s bioclimatic envelope is predicted to increase by 20% with a ~2° mean latitudinal polewards shift and a mean increase in elevation of ~90m driven by an increase in minimum and maximum elevation. 95% of the permutation importance of the model was contributed to by annual evapotranspiration (29.5%), precipitation seasonality (26.2%), minimum temperature (11.5%), temperature seasonality (8.5%), minimum precipitation (8.1%), maximum temperature (3.3%), normalised difference vegetation index (2.9%), maximum precipitation (2.8%) and annual water balance (2.3%).

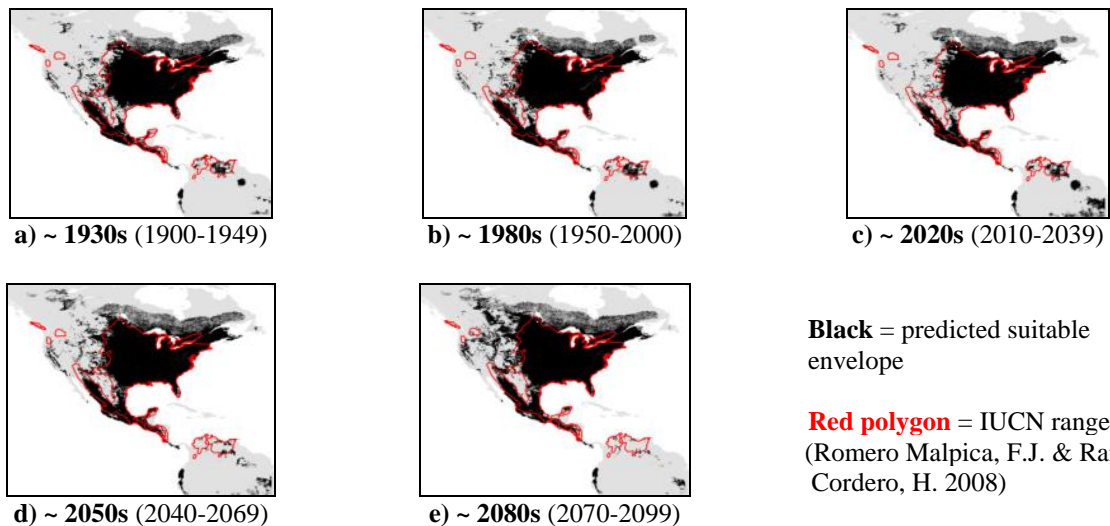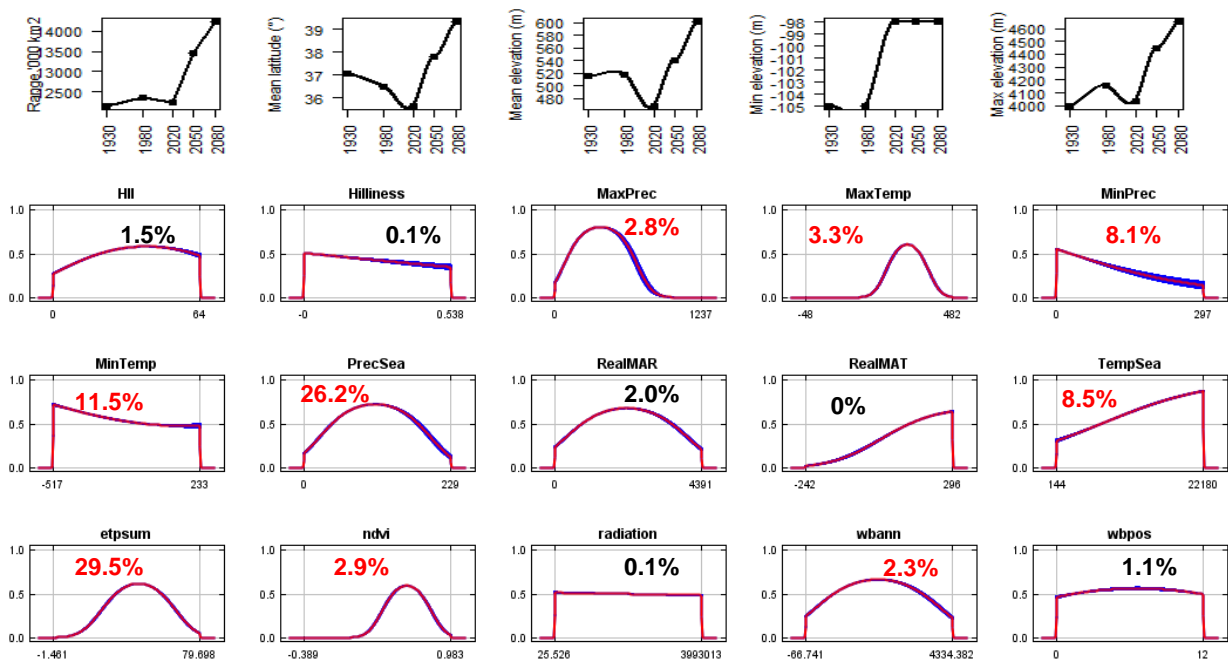



**#81 – Tres Marias cottontail (*Sylvilagus graysoni*)**

*n* = 6

**Expert:** Consuelo Lorenzo, Departamento Conservación de la Biodiversidad, Chiapas

**Expert evaluation:** Good

**Data:** Modern and historic

**Envelope:** Climatic and habitat

**Dispersal distance:** 0.01km/year (Island species, range 0.01-0.01)

**Status:** MODELLABLE; **Included in final analysis:** ✓

| Model evaluation metric |             |
|-------------------------|-------------|
| AUC                     | 1.00        |
| Omission rate           | 0.00        |
| Sensitivity             | 1.00        |
| Specificity             | 1.00        |
| Proportion correct      | 1.00        |
| <b>Kappa</b>            | <b>1.00</b> |
| True Skill Statistic    | 1.00        |

**Summary:** The Tres Marias cottontail’s bioclimatic envelope is predicted to decrease by 20% with a no latitudinal polewards shift and a mean increase in elevation of ~25m driven by an increase in minimum elevation. 95% of the permutation importance of the model was contributed to by human influence index (56.0%), minimum precipitation (32.4%), precipitation seasonality (5.2%) and annual evapotranspiration (3.2%).

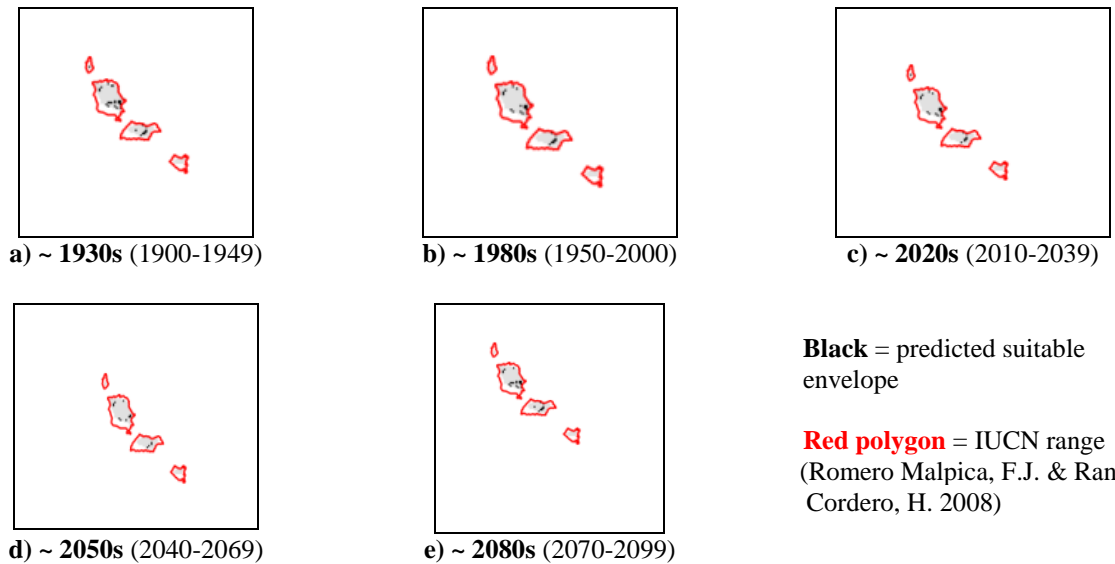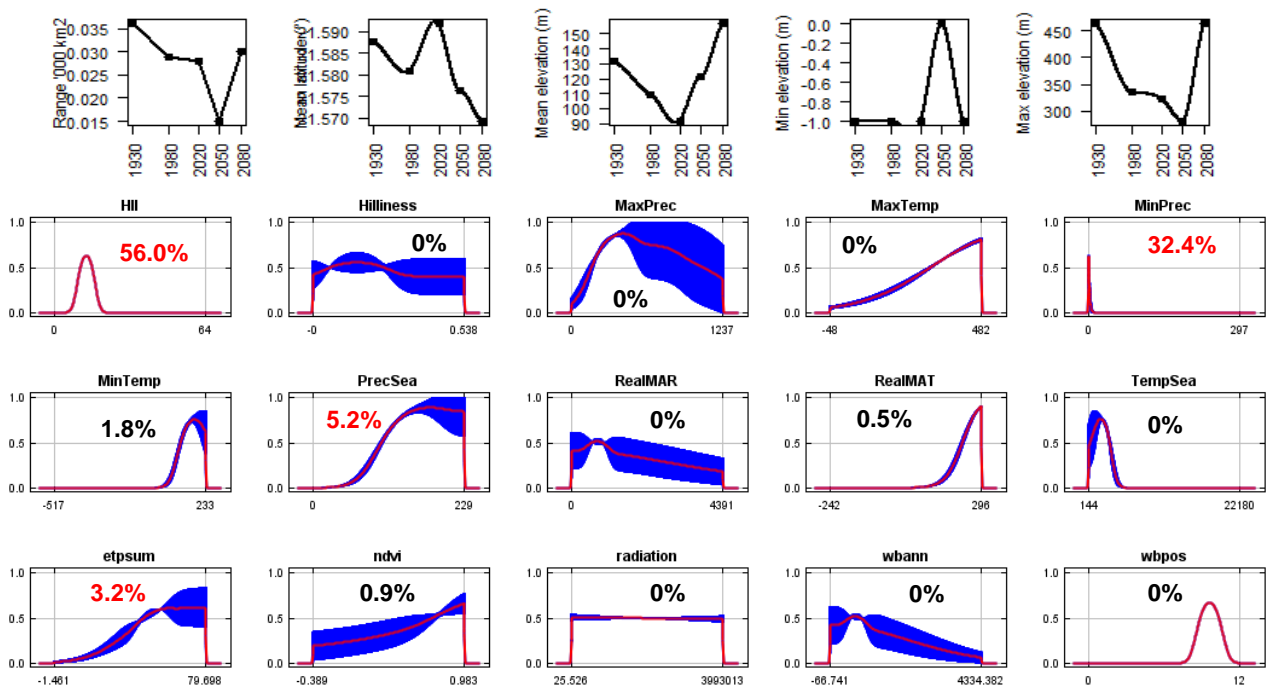

**#82 – Omilteme cottontail (*Sylvilagus insonus*)**

*n* = 3

**Expert:** Alejandro Velazquez, UNAM-Canada

**Expert evaluation:** Good

**Data:** Only modern

**Envelope:** Climatic and habitat

**Dispersal distance:** 0.01km/year (Similar ecology to *S.dicei*)

**Status:** MODELLABLE; **Included in final analysis:** √

| Model evaluation metric |             |
|-------------------------|-------------|
| AUC                     | 1.00        |
| Omission rate           | 0.00        |
| Sensitivity             | 1.00        |
| Specificity             | 1.00        |
| Proportion correct      | 1.00        |
| <b>Kappa</b>            | <b>1.00</b> |
| True Skill Statistic    | 1.00        |

**Summary:** The Omilteme cottontail’s bioclimatic envelope is predicted to decrease by 80% with a no latitudinal polewards shift and a mean increase in elevation of ~120m driven by an increase in maximum elevation. 95% of the permutation importance of the model was contributed to by normalised difference vegetation index (78.5%), precipitation seasonality (11.3%) and temperature seasonality (5.3%).

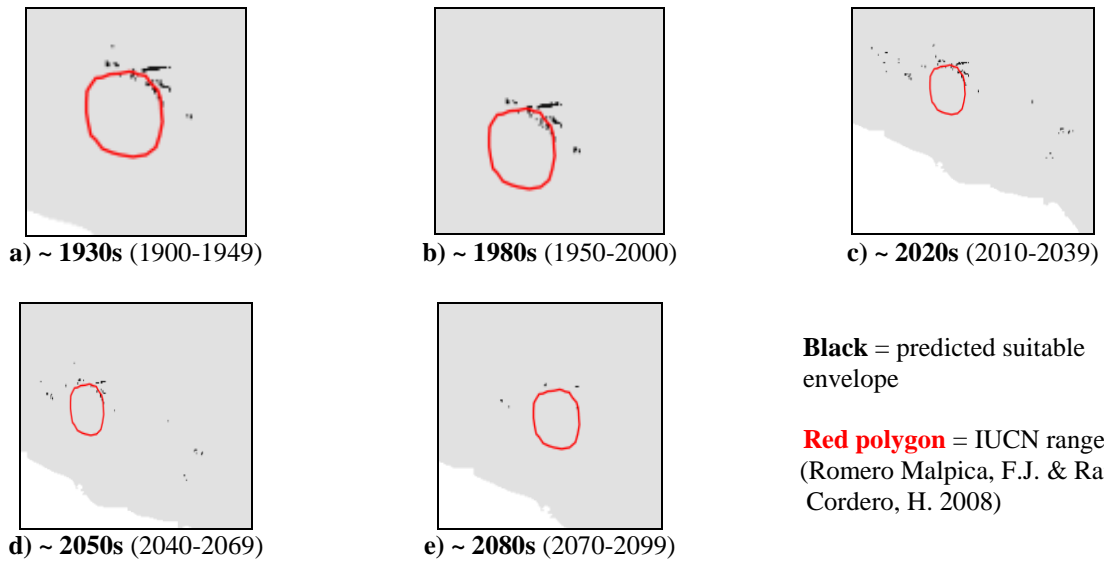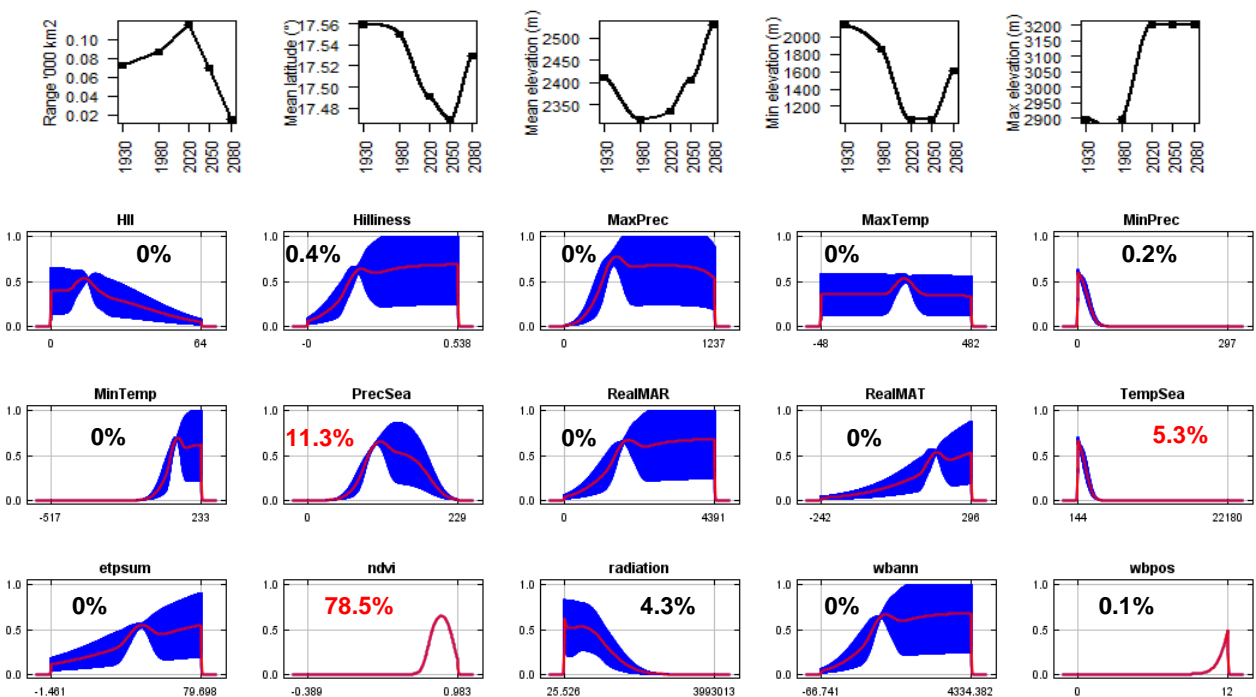

**#83 – San Jose brush rabbit (*Sylvilagus mansuetus*)**

*n* = 9

**Expert:** Tamara Rioja Pardela, Universidad de Ciencias y Artes de Chiapas, Mexico

**Expert evaluation:** Good

**Data:** Only modern

**Envelope:** Climatic and habitat

**Dispersal distance:** 0.01km/year (Island species, range 0.01-0.01)

**Status:** MODELLABLE; **Included in final analysis:** ✓

|                      |             |
|----------------------|-------------|
| AUC                  | 1.00        |
| Omission rate        | 0.00        |
| Sensitivity          | 1.00        |
| Specificity          | 1.00        |
| Proportion correct   | 1.00        |
| <b>Kappa</b>         | <b>1.00</b> |
| True Skill Statistic | 1.00        |

**Summary:** The San Jose brush rabbit’s bioclimatic envelope is predicted to decrease by 25% with a no latitudinal polewards shift and a mean increase in elevation of ~30m driven by an increase in minimum elevation. 95% of the permutation importance of the model was contributed to by temperature seasonality (36.7%), human influence index (34.0%), minimum precipitation (21.8%) and precipitation seasonality (3.2%).

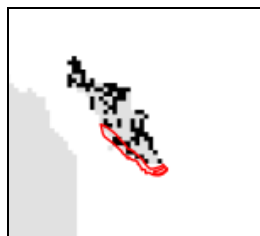

a) ~ 1930s (1900-1949)

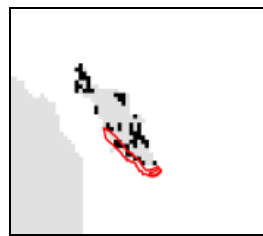

b) ~ 1980s (1950-2000)

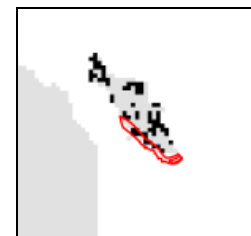

c) ~ 2020s (2010-2039)

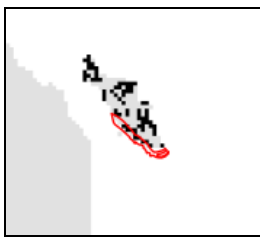

d) ~ 2050s (2040-2069)

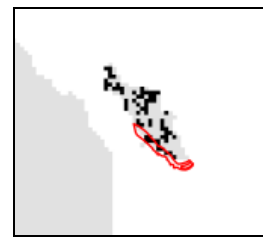

e) ~ 2080s (2070-2099)

**Black** = predicted suitable envelope

**Red polygon** = IUCN range (Lorenzo, C. & Álvarez-Castañeda, S. 2011)

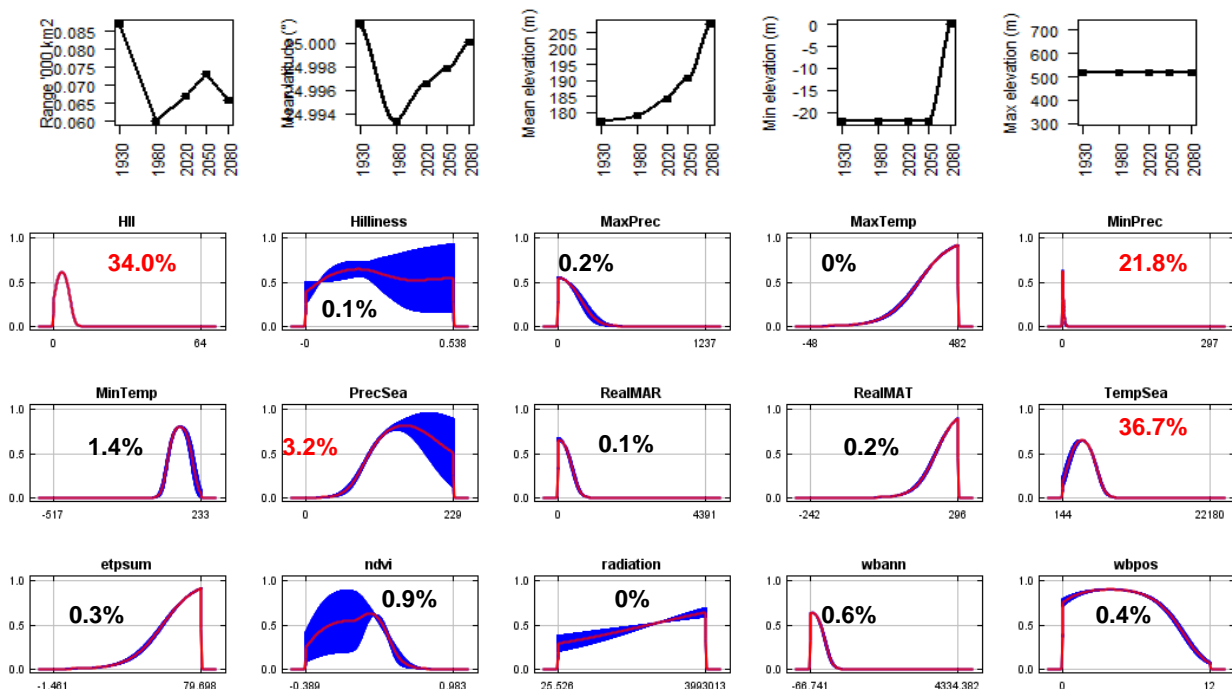

**#84 – Mountain cottontail (*Sylvilagus nuttallii*)**

*n* = 290

**Expert:** Jennifer Frey, New Mexico State University

**Expert evaluation:** Medium

**Data:** Modern and historic

**Envelope:** Climatic and habitat

**Dispersal distance:** 7.5km/year (Similar ecology to *S.palustris*)

**Status:** MODELLABLE; **Included in final analysis:** √

|                      |             |
|----------------------|-------------|
| AUC                  | 0.95        |
| Omission rate        | 0.09        |
| Sensitivity          | 0.91        |
| Specificity          | 0.99        |
| Proportion correct   | 0.99        |
| <b>Kappa</b>         | <b>0.78</b> |
| True Skill Statistic | 0.90        |

**Summary:** The Mountain cottontail’s bioclimatic envelope is predicted to decrease by 20% with a ~1° mean latitudinal polewards shift and a mean increase in elevation of ~40m driven by an increase in minimum elevation. 95% of the permutation importance of the model was contributed to by mean annual temperature (64.0%), maximum temperature (26.9%), temperature seasonality (2.8%) and minimum precipitation (1.4%).

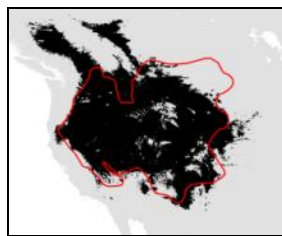

a) ~ 1930s (1900-1949)

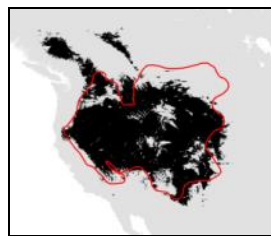

b) ~ 1980s (1950-2000)

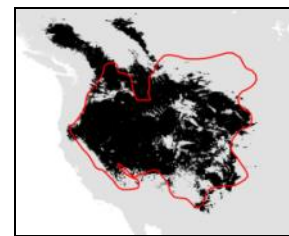

c) ~ 2020s (2010-2039)

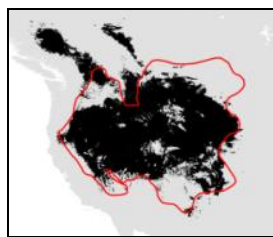

d) ~ 2050s (2040-2069)

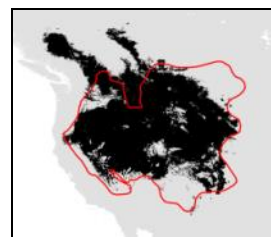

e) ~ 2080s (2070-2099)

**Black** = predicted suitable envelope

**Red polygon** = IUCN range (Smith, A.T. & Boyer, A.F. 2008)

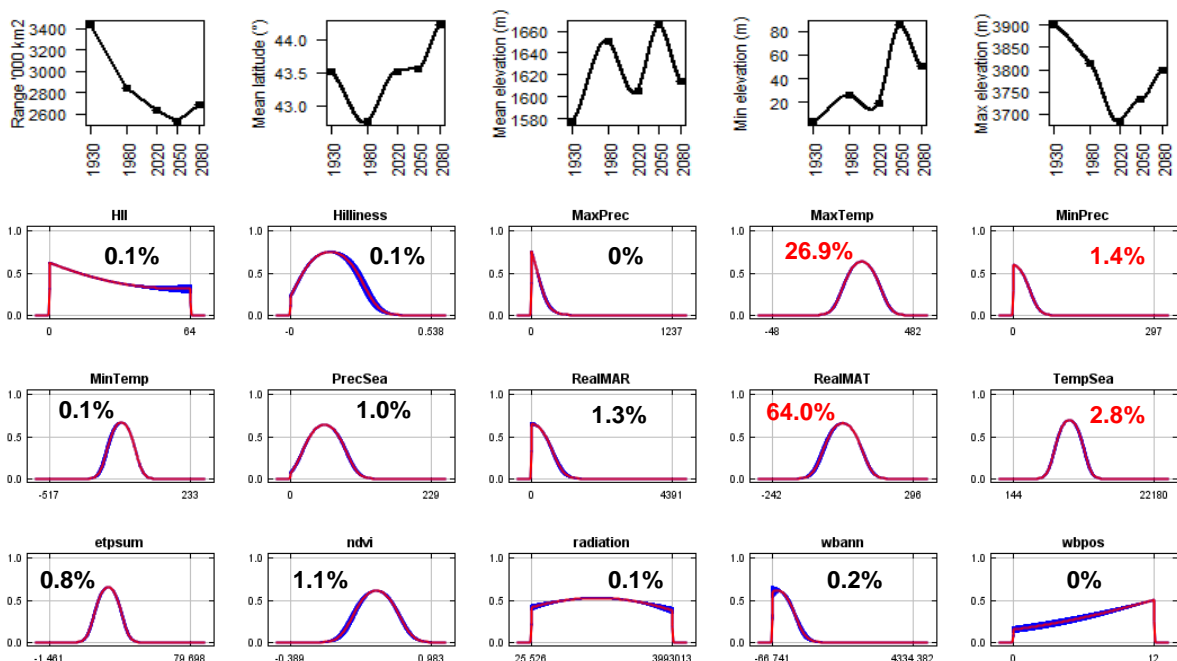

**#85 – Appalachian cottontail (*Sylvilagus obscurus*)**

*n* = 39

**Expert:** Michael Barbour, Alabama Natural Heritage Program

**Expert evaluation:** Medium

**Data:** Modern and historic

**Envelope:** Climatic only

**Dispersal distance:** 0.01km/year (Similar ecology to *S.dicei*)

**Status:** MODELLABLE; **Included in final analysis:** ✓

|                      |             |
|----------------------|-------------|
| AUC                  | 0.97        |
| Omission rate        | 0.05        |
| Sensitivity          | 0.95        |
| Specificity          | 0.99        |
| Proportion correct   | 0.99        |
| <b>Kappa</b>         | <b>0.73</b> |
| True Skill Statistic | 0.95        |

**Summary:** The Appalachian cottontail’s bioclimatic envelope is predicted to decrease by 10% with a ~3° mean latitudinal polewards shift and a mean increase in elevation of ~70m. 95% of the permutation importance of the model was contributed to by annual evapotranspiration (42.0%), minimum temperature (24.2%), minimum precipitation (18.8%) and precipitation seasonality (10.0%).

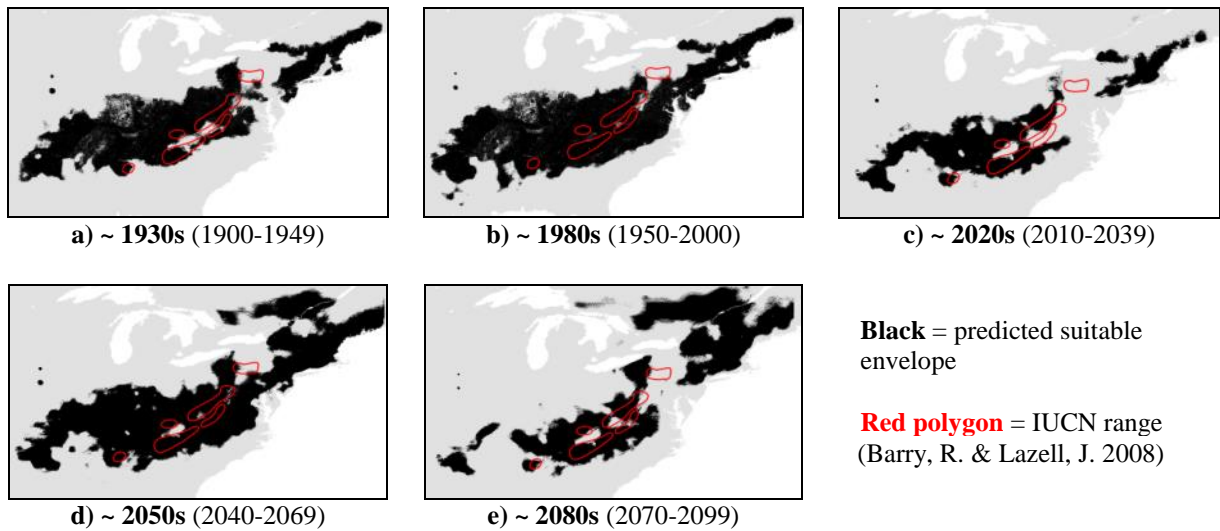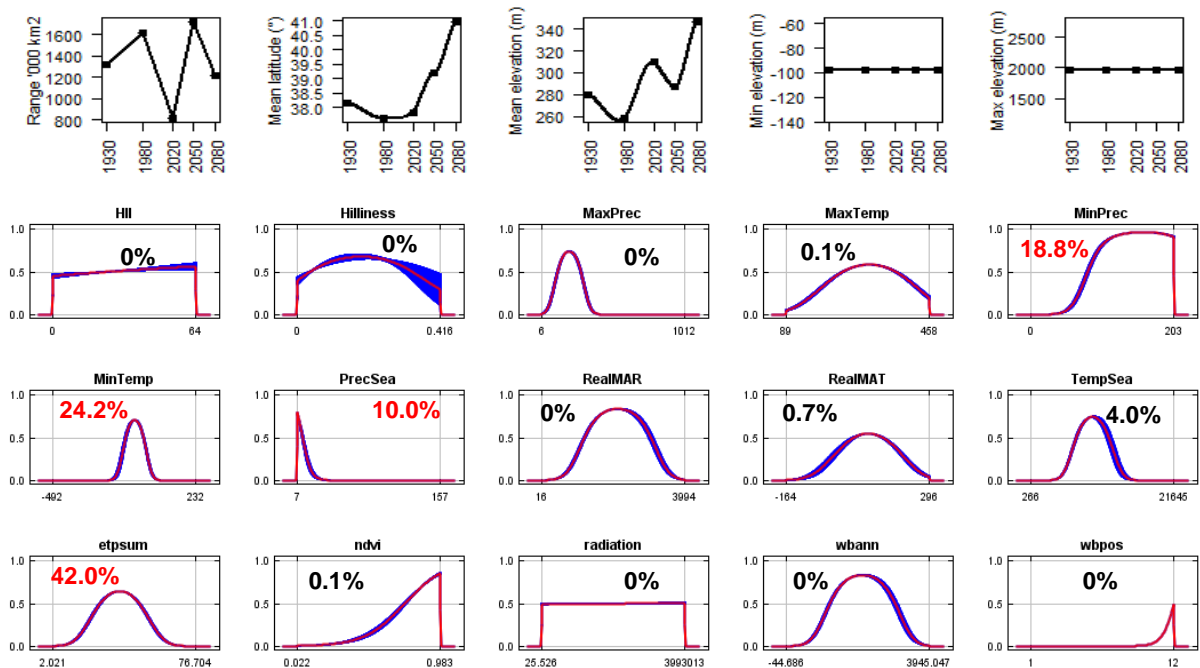



**#86 – Marsh rabbit (*Sylvilagus palustris*)**

*n* = 25

**Expert:** Bob McCleery, University of Florida

**Expert evaluation:** Good

**Data:** Only modern

**Envelope:** Climatic and habitat

**Dispersal distance:** 7.5km/year (Expert)

**Status:** MODELLABLE; **Included in final analysis:** √

|                      |             |
|----------------------|-------------|
| AUC                  | 0.99        |
| Omission rate        | 0.00        |
| Sensitivity          | 1.00        |
| Specificity          | 0.99        |
| Proportion correct   | 0.99        |
| <b>Kappa</b>         | <b>0.75</b> |
| True Skill Statistic | 0.99        |

**Summary:** The Marsh rabbit's bioclimatic envelope is predicted to increase by 90% with a ~1° mean latitudinal polewards shift and a mean increase in elevation of ~2m driven by an increase in maximum elevation. 95% of the permutation importance of the model was contributed to by surface roughness index (73.1%), minimum precipitation (18.3%) and precipitation seasonality (4.9%).

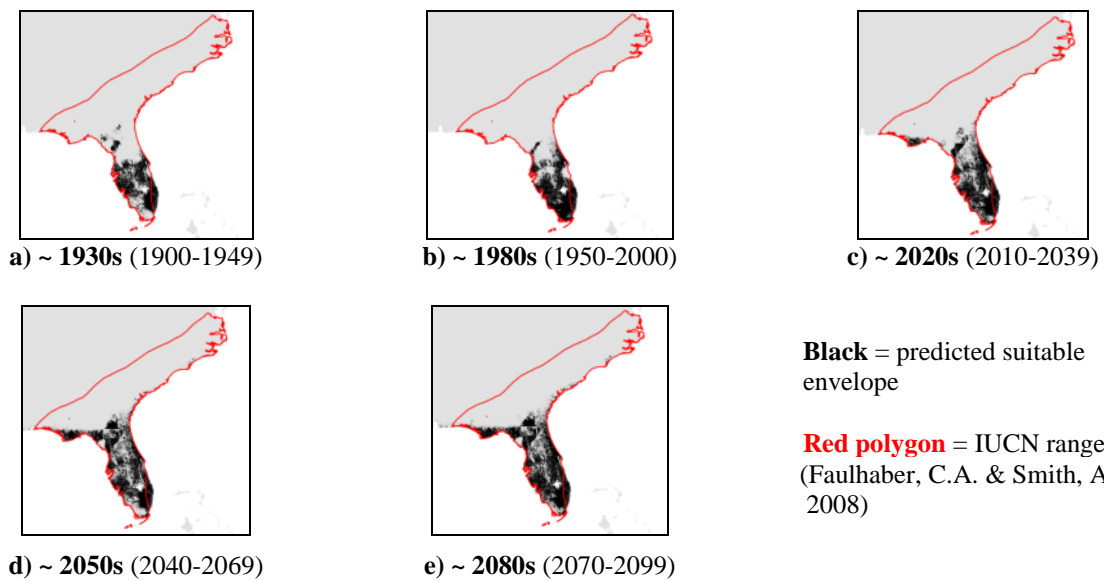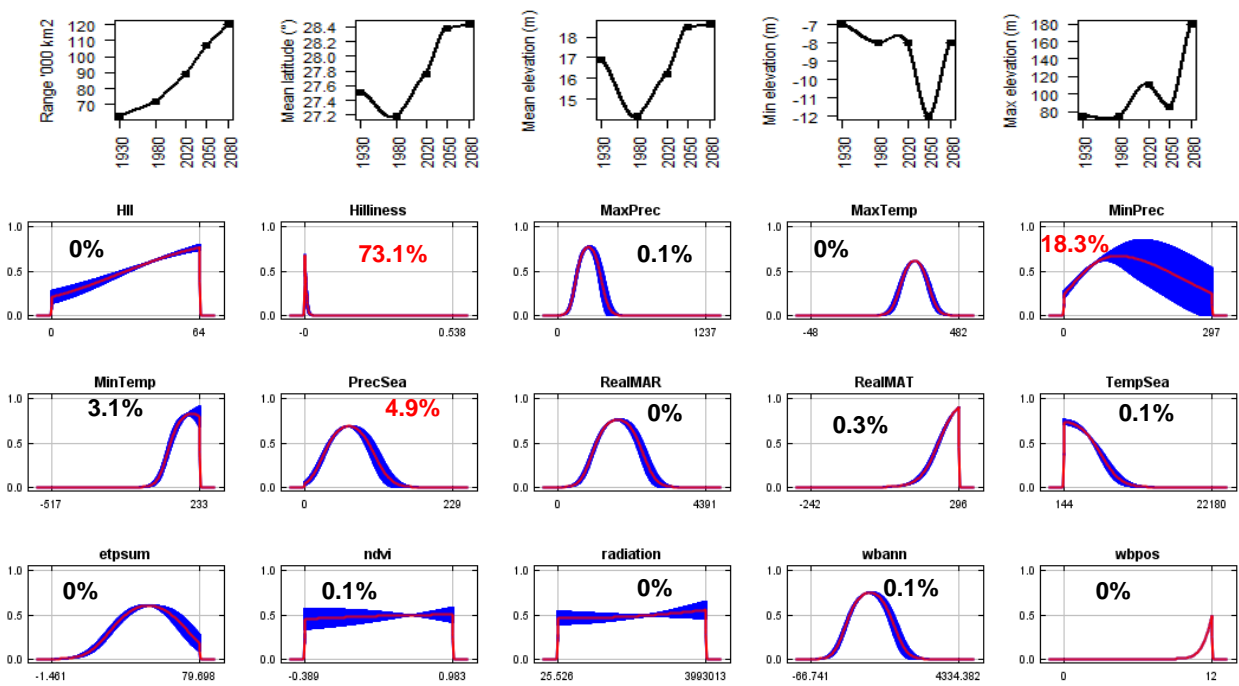

**#87 – Robust cottontail (*Sylvilagus robustus*)**

*n* = 9

**Expert:** Dana Lee, Oklahoma State University

**Expert evaluation:** Poor

**Data:** Modern and historic

**Envelope:** Climatic and habitat

**Dispersal distance:** 0.01km/year (Similar ecology to *S.dicei*)

**Status:** UNMODELLABLE; **Included in final analysis:** X

|                      |             |
|----------------------|-------------|
| AUC                  | 0.94        |
| Omission rate        | 0.11        |
| Sensitivity          | 0.89        |
| Specificity          | 0.99        |
| Proportion correct   | 0.99        |
| <b>Kappa</b>         | <b>0.27</b> |
| True Skill Statistic | 0.88        |

**Summary:** The Robust cottontail’s bioclimatic envelope is predicted to decrease by 90% with a ~4° mean latitudinal polewards shift and a mean increase in elevation of ~480m driven by an increase in minimum elevation. 95% of the permutation importance of the model was contributed to by precipitation seasonality (68.5%), minimum precipitation (8.2%), temperature seasonality (7.1%), minimum temperature (4.5%), mean annual precipitation (3.6%), annual water balance (2.6%) and number of months with a positive water balance (1.6%).

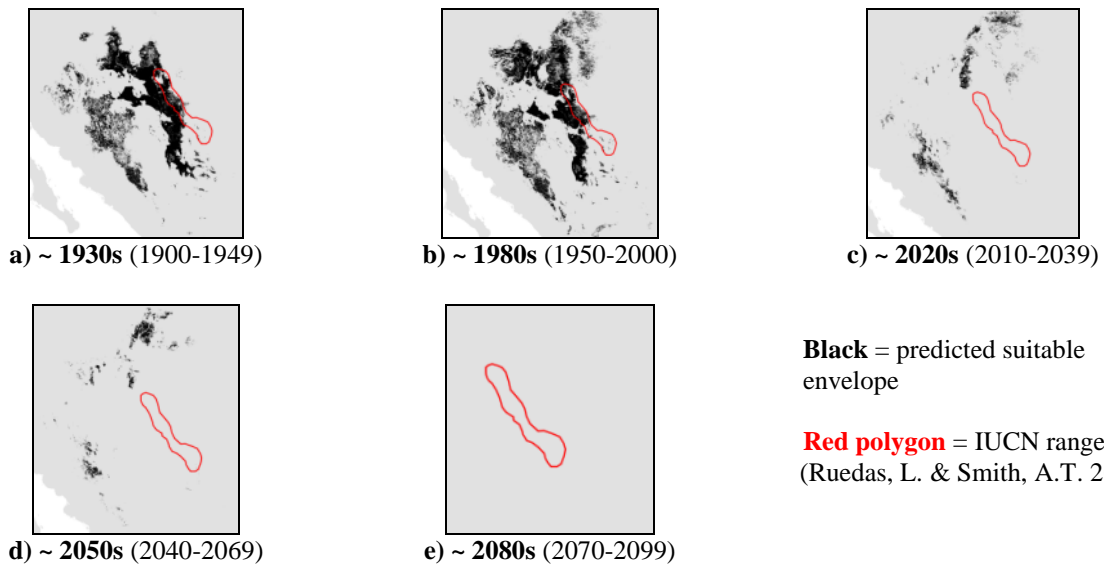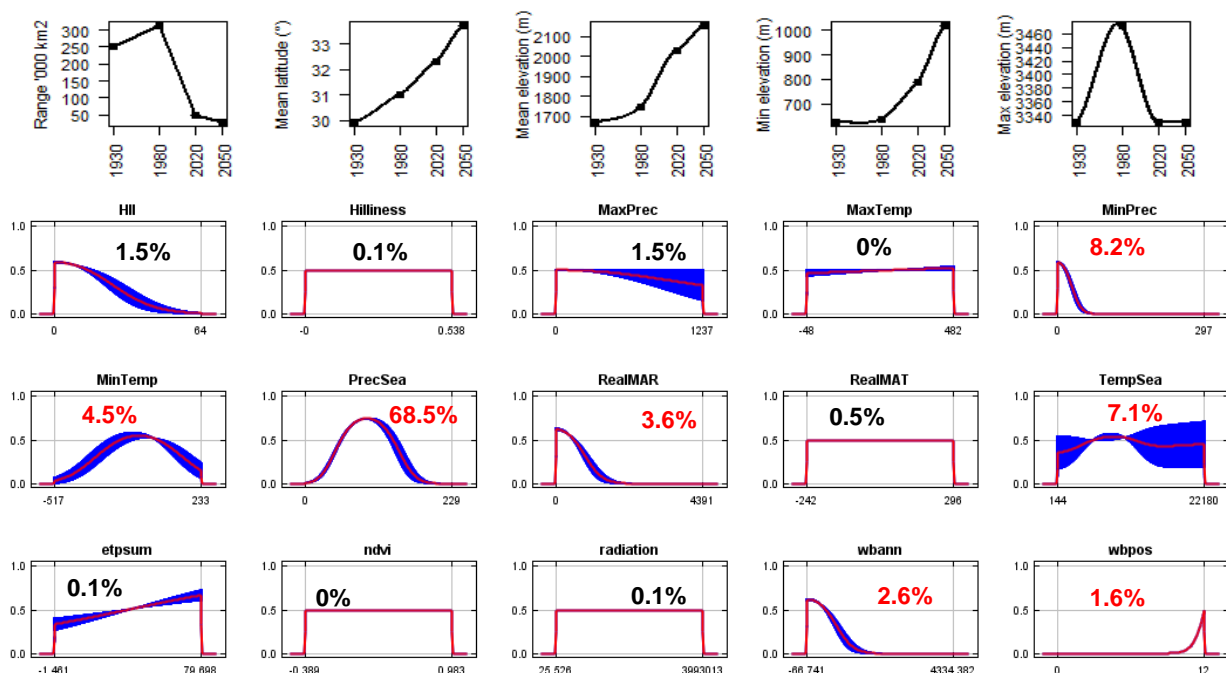

**#88 – New England cottontail (*Sylvilagus transitionalis*)**

*n* = 18

**Expert:** John Litvaitis, University of New Hampshire

**Expert evaluation:** Medium

**Data:** Modern and historic

**Envelope:** Climatic and habitat

**Dispersal distance:** 3km/year (Expert)

**Status:** MODELLABLE; **Included in final analysis:** ✓

|                      |             |
|----------------------|-------------|
| AUC                  | 0.99        |
| Omission rate        | 0.00        |
| Sensitivity          | 1.00        |
| Specificity          | 0.99        |
| Proportion correct   | 0.99        |
| <b>Kappa</b>         | <b>0.68</b> |
| True Skill Statistic | 0.99        |

**Summary:** The New England cottontail’s bioclimatic envelope is predicted to increase by 110% with a ~1° mean latitudinal polewards shift and a mean increase in elevation of ~70m driven by an increase in maximum elevation. 95% of the permutation importance of the model was contributed to by annual evapotranspiration (23.5%), temperature seasonality (22.2%), minimum temperature (17.4%), normalised difference vegetation index (16.0%), mean annual temperature (8.6%), maximum temperature (5.9%) and minimum precipitation (5.9%).

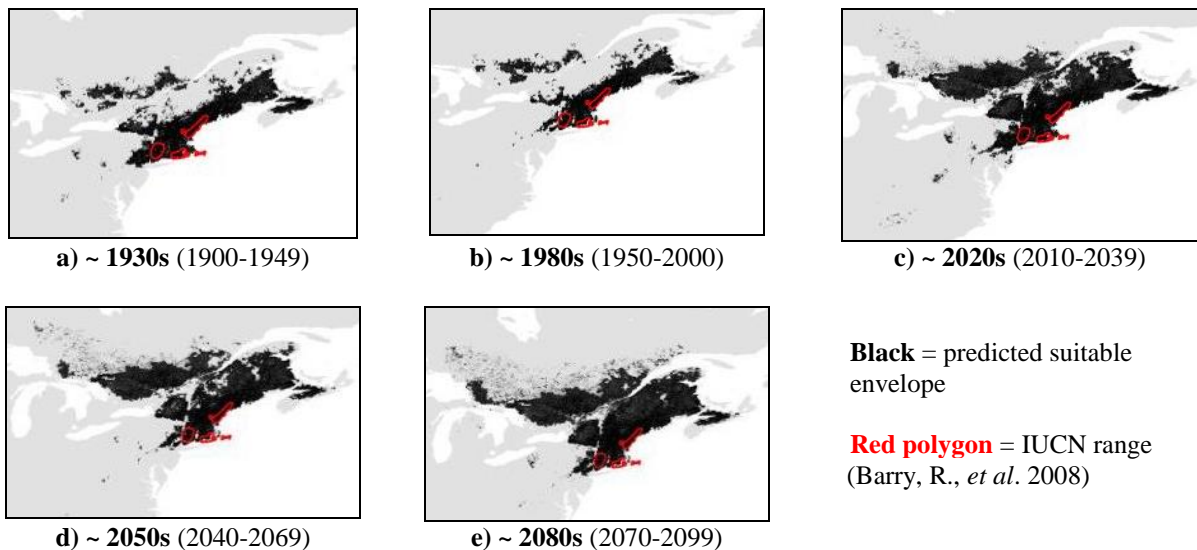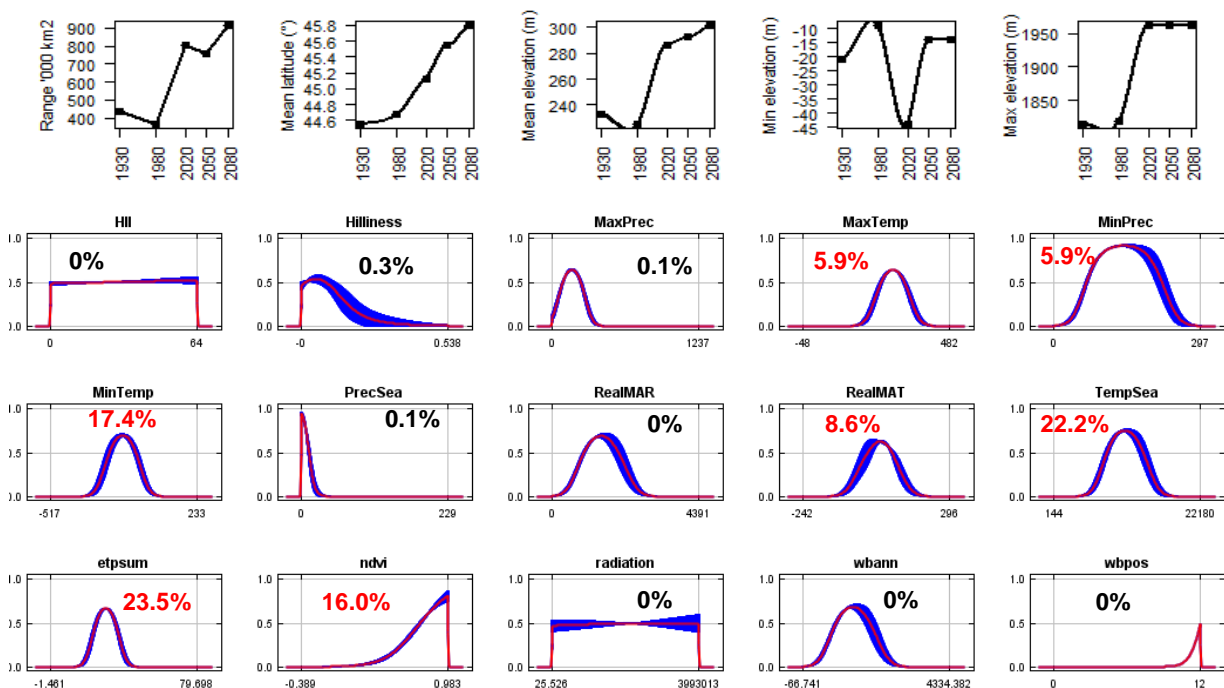

**#89 – Venezuelan lowland rabbit (*Sylvilagus varynaensis*)**

*n* = 6

**Expert:** Daniel Lew, Venezuelan Institute of Scientific Research, Ecology Centre, Biodiversity Unit

**Expert evaluation:** Poor

**Data:** Only modern

**Envelope:** Climatic and habitat

**Dispersal distance:** 3km/year (Similar ecology to *S.transitionalis*)

**Status:** UNMODELLABLE; **Included in final analysis:** X

|                      |             |
|----------------------|-------------|
| AUC                  | 0.99        |
| Omission rate        | 0.00        |
| Sensitivity          | 1.00        |
| Specificity          | 0.99        |
| Proportion correct   | 0.99        |
| <b>Kappa</b>         | <b>0.92</b> |
| True Skill Statistic | 0.99        |

**Summary:** The Venezuelan lowland rabbit’s bioclimatic envelope is predicted to decrease by 100% with a ~1.5° mean latitudinal polewards shift and a mean increase in elevation of ~275m driven by an increase in minimum elevation. 95% of the permutation importance of the model was contributed to by temperature seasonality (97.7%).

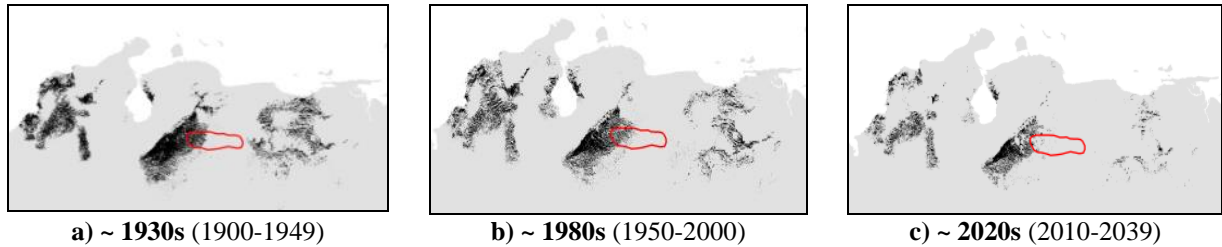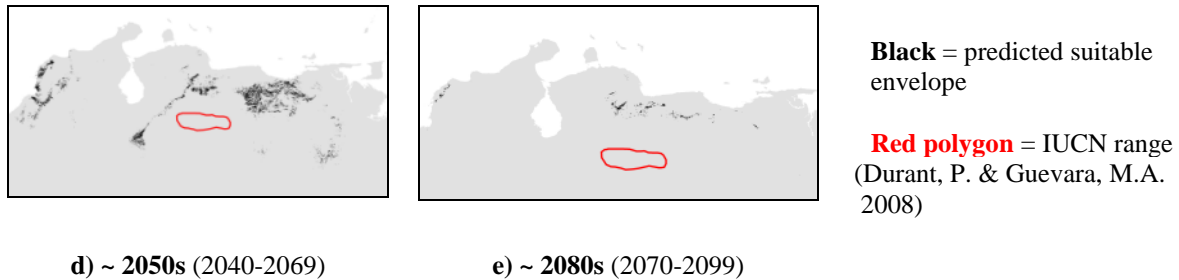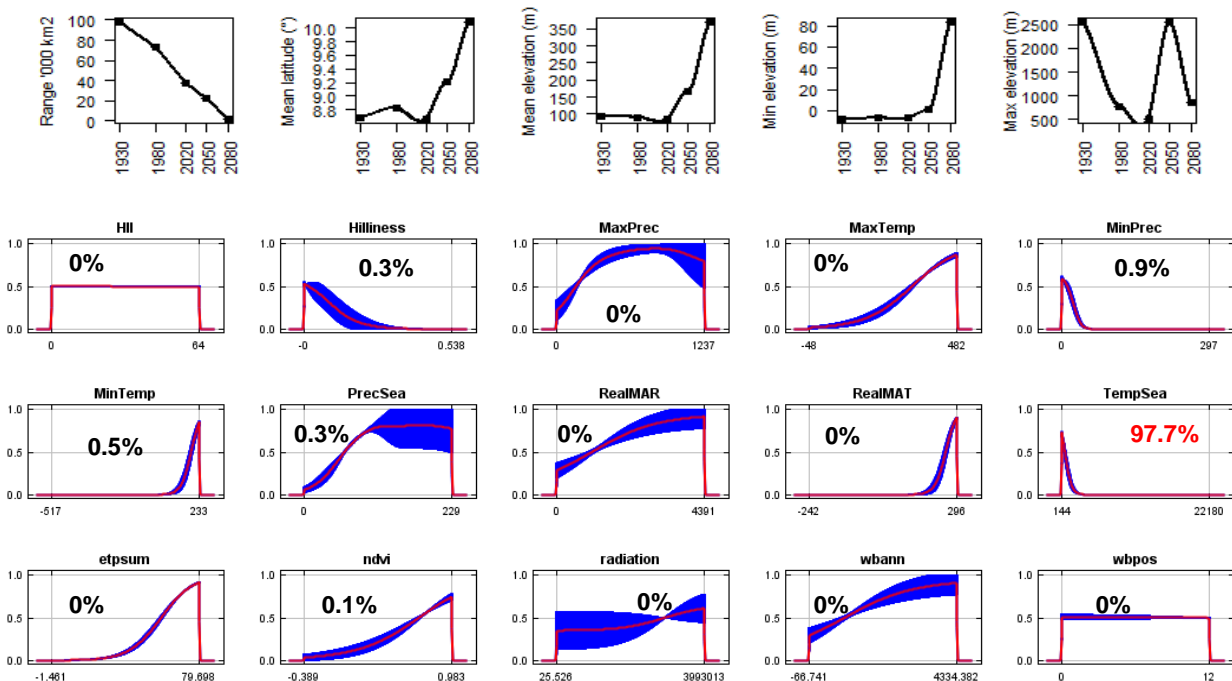

Supplement: pone.0122267.s002.pdf [file pone.0122267.s002.pdf]
