# Supplementary material for: Expertly Validated Models and Phylogenetically-Controlled Analysis Suggests Responses to Climate Change Are Related to Species Traits in the Order Lagomorpha
Source: PubMed Central journal article supplement (PMC4398435; doi:10.1371/journal.pone.0122267), 2015-04-15
Supplement: pone.0122267.s003.pdf [file pone.0122267.s003.pdf]

### S3 Supporting Information.

**Table A. Lagomorph experts, institutions and species evaluated.**

| <b>Expert</b>         | <b>Institution</b>                                                             | <b>Species evaluated</b>                                                                                                                                                                                                                                                                                                                       |
|-----------------------|--------------------------------------------------------------------------------|------------------------------------------------------------------------------------------------------------------------------------------------------------------------------------------------------------------------------------------------------------------------------------------------------------------------------------------------|
| Alejandro Velazquez   | UNAM-Canada                                                                    | <i>Lepus californicus</i><br><i>Sylvilagus insonus</i>                                                                                                                                                                                                                                                                                         |
| Andrew Smith          | Arizona State University                                                       | <i>Ochotona argentata</i><br><i>Ochotona curzoniae</i><br><i>Ochotona dauurica</i><br><i>Ochotona erythrotis</i><br><i>Ochotona forresti</i><br><i>Ochotona gloveri</i><br><i>Ochotona iliensis</i><br><i>Ochotona koslowi</i><br><i>Ochotona ladacensis</i><br><i>Ochotona princeps</i><br><i>Ochotona pusilla</i><br><i>Ochotona thomasi</i> |
| Andrew Tilker         | University of Texas Austin                                                     | <i>Nesolagus timminsi</i>                                                                                                                                                                                                                                                                                                                      |
| Andrey Lissovsky      | Zoological Museum of Moscow State University                                   | <i>Ochotona hoffmanni</i><br><i>Ochotona pallasi</i><br><i>Ochotona rutile</i><br><i>Ochotona turuchanensis</i>                                                                                                                                                                                                                                |
| Arturo Carillo-Reyes  | Universidad de Ciencias y Artes de Chiapas                                     | <i>Lepus flavigularis</i>                                                                                                                                                                                                                                                                                                                      |
| Bob McCleery          | University of Florida                                                          | <i>Sylvilagus palustris</i>                                                                                                                                                                                                                                                                                                                    |
| Charles Krebs         | University of British Columbia                                                 | <i>Lepus americanus</i>                                                                                                                                                                                                                                                                                                                        |
| Chelmala Srinivasulu  | Osmania University, India                                                      | <i>Lepus tibetanus</i><br><i>Lepus tolai</i><br><i>Ochotona rufescens</i>                                                                                                                                                                                                                                                                      |
| Consuelo Lorenzo      | Departamento Conservación de la Biodiversidad, Chiapas                         | <i>Sylvilagus audubonii</i><br><i>Sylvilagus bachmani</i><br><i>Sylvilagus graysoni</i>                                                                                                                                                                                                                                                        |
| Dana Lee              | Oklahoma State University                                                      | <i>Sylvilagus robustus</i>                                                                                                                                                                                                                                                                                                                     |
| Daniel Lew            | Venezuelan Institute of Scientific Research, Ecology Centre, Biodiversity Unit | <i>Sylvilagus varynaensis</i>                                                                                                                                                                                                                                                                                                                  |
| David Gray            | Grayhound Information Services                                                 | <i>Lepus arcticus</i>                                                                                                                                                                                                                                                                                                                          |
| David Happold         | Australian National University                                                 | <i>Poelagus marjorita</i><br><i>Pronolagus saundersiae</i>                                                                                                                                                                                                                                                                                     |
| Deyan Ge              | Institute of Zoology, Chinese Academy of Sciences                              | <i>Lepus mandshuricus</i><br><i>Ochotona thibetana</i>                                                                                                                                                                                                                                                                                         |
| Eric Waltari          | City University of New York                                                    | <i>Lepus othus</i><br><i>Lepus townsendii</i>                                                                                                                                                                                                                                                                                                  |
| Francesco Angelici    | Italian Foundation of Vertebrate Zoology                                       | <i>Lepus corsicanus</i>                                                                                                                                                                                                                                                                                                                        |
| Fumio Yamada          | Forestry and Forest Products Research Institute, Japan                         | <i>Pentalagus furnessi</i>                                                                                                                                                                                                                                                                                                                     |
| Gopinathan Maheswaran | Zoological Survey of India                                                     | <i>Caprolagus hispidus</i><br><i>Lepus nigricollis</i>                                                                                                                                                                                                                                                                                         |
| Hariyo Wibisono       | Wildlife Conservation Society, Indonesia                                       | <i>Nesolagus netscheri</i>                                                                                                                                                                                                                                                                                                                     |
| Hayley Lanier         | University of Michigan                                                         | <i>Ochotona collaris</i>                                                                                                                                                                                                                                                                                                                       |
| Jan Schipper          | Arizona State University                                                       | <i>Sylvilagus dicei</i>                                                                                                                                                                                                                                                                                                                        |
| Jennifer Frey         | New Mexico State University                                                    | <i>Lepus callotis</i><br><i>Sylvilagus cognatus</i><br><i>Sylvilagus nuttallii</i>                                                                                                                                                                                                                                                             |
| John Flux             | IUCN Lagomorph Specialist Group                                                | <i>Lepus capensis</i><br><i>Lepus microtis</i>                                                                                                                                                                                                                                                                                                 |
| John Litvaitis        | University of New Hampshire                                                    | <i>Sylvilagus transitionalis</i>                                                                                                                                                                                                                                                                                                               |
| Jorge Salazar-Bravo   | Texas Tech University                                                          | <i>Sylvilagus brasiliensis</i>                                                                                                                                                                                                                                                                                                                 |

|                              |                                                         |                                                                                                                                                           |
|------------------------------|---------------------------------------------------------|-----------------------------------------------------------------------------------------------------------------------------------------------------------|
| Jorge Vazquez                | Laboratorio de Ecología del Comportamiento,<br>UAT-UNAM | <i>Sylvilagus cunicularius</i><br><i>Sylvilagus floridanus</i>                                                                                            |
| Jose Antonio Martinez-Garcia | Universidad Autónoma Metropolitana,<br>Mexico           | <i>Romerolagus diazi</i>                                                                                                                                  |
| Julia Witzuk                 | Warsaw Agricultural University, Poland                  | <i>Ochotona hyperborea</i>                                                                                                                                |
| Kai Collins                  | University of Pretoria                                  | <i>Bunolagus monticularis</i><br><i>Lepus saxatilis</i><br><i>Pronolagus crassicaudatus</i><br><i>Pronolagus randensis</i><br><i>Pronolagus rupestris</i> |
| Koji Shimano                 | Shinshu University, Japan                               | <i>Lepus brachyurus</i>                                                                                                                                   |
| Michael Barbour              | Alabama Natural Heritage Program                        | <i>Sylvilagus obscurus</i>                                                                                                                                |
| Neil Reid                    | Queen's University Belfast                              | <i>Lepus europaeus</i><br><i>Lepus timidus</i><br><i>Oryctolagus cuniculus</i>                                                                            |
| Nishma Dahal                 | National Centre for Biological Sciences, India          | <i>Ochotona macrotis</i><br><i>Ochotona nubrica</i>                                                                                                       |
| Paul Krausman                | University of Montana                                   | <i>Lepus alleni</i>                                                                                                                                       |
| Pelayo Acevedo               | University of Porto                                     | <i>Lepus castroviejoii</i><br><i>Lepus granatensis</i>                                                                                                    |
| Penny Becker                 | Washington Dept. of Fish & Wildlife, USA                | <i>Brachylagus idahoensis</i>                                                                                                                             |
| Robert Kissell               | Memphis State University                                | <i>Sylvilagus aquaticus</i>                                                                                                                               |
| Rudy Boonstra                | University of Toronto Scarborough                       | <i>Lepus americanus</i>                                                                                                                                   |
| Sabuj Bhattacharya           | Wildlife Institute of India                             | <i>Ochotona roylei</i>                                                                                                                                    |
| Sumiya Ganzorig              | Hokkaido University                                     | <i>Ochotona alpina</i>                                                                                                                                    |
| Tamara Rioja Pardela         | Universidad de Ciencias y Artes de Chiapas,<br>Mexico   | <i>Lepus insularis</i><br><i>Sylvilagus mansuetus</i>                                                                                                     |
| Thomas Gray                  | WWF Greater Mekong                                      | <i>Lepus peguensis</i>                                                                                                                                    |
| Weihe Yang                   | Institute of Zoology, Chinese Academy of<br>Sciences    | <i>Lepus comus</i><br><i>Lepus coreanus</i><br><i>Lepus oiostolus</i><br><i>Lepus sinensis</i><br><i>Lepus yarkandensis</i>                               |
| Youhua Chen                  | Wuhan University, China                                 | <i>Lepus hainanus</i>                                                                                                                                     |
| Zelalem Tolesa               | Addis Ababa University                                  | <i>Lepus fagani</i><br><i>Lepus habessinicus</i><br><i>Lepus starcki</i>                                                                                  |

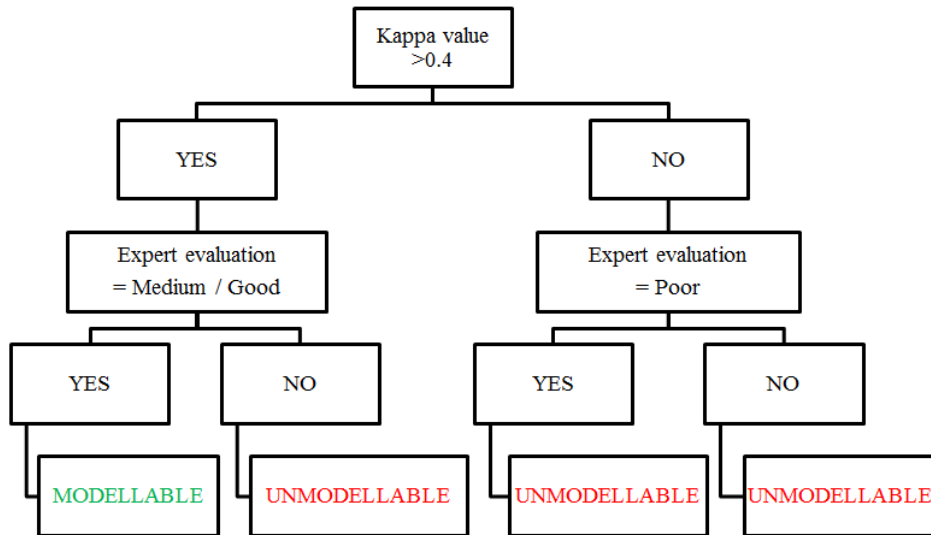

**Fig. A. Framework for assessing whether species were “modellable” or “unmodellable” based on Kappa values and expert evaluation classification.**

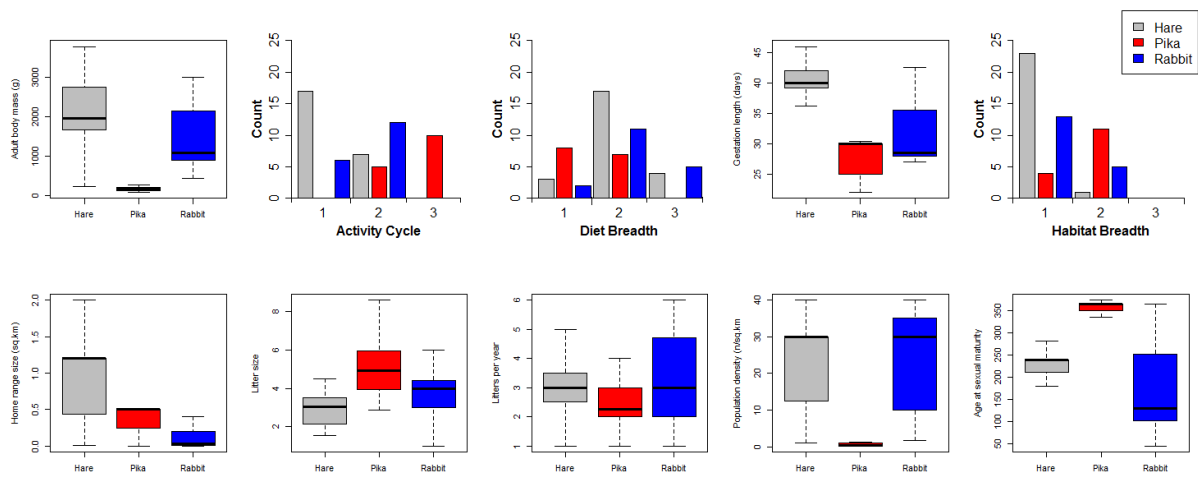

**Fig. B. Trait values for all three lagomorph groups (rabbits, hares & jackrabbits, and pikas).** Pikas are shown in red, rabbits in blue and hares and jackrabbits in grey. Activity cycle, diet breadth and habitat breadth are categorical variables and are therefore represented as bar plots.

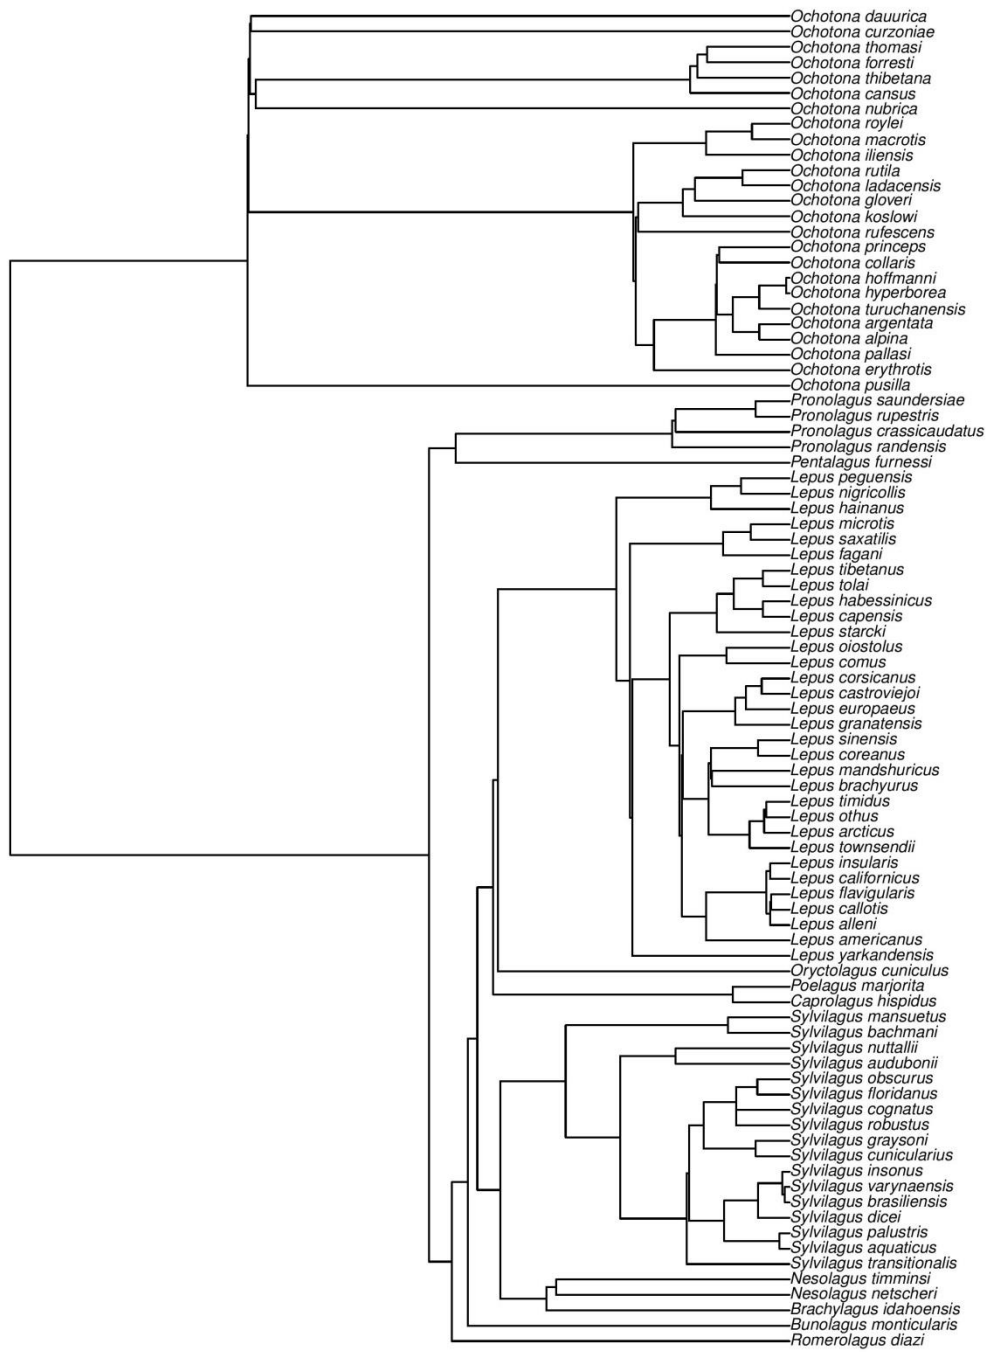

**Fig. C. Full lagomorph phylogeny used in phylogenetically controlled regressions.**

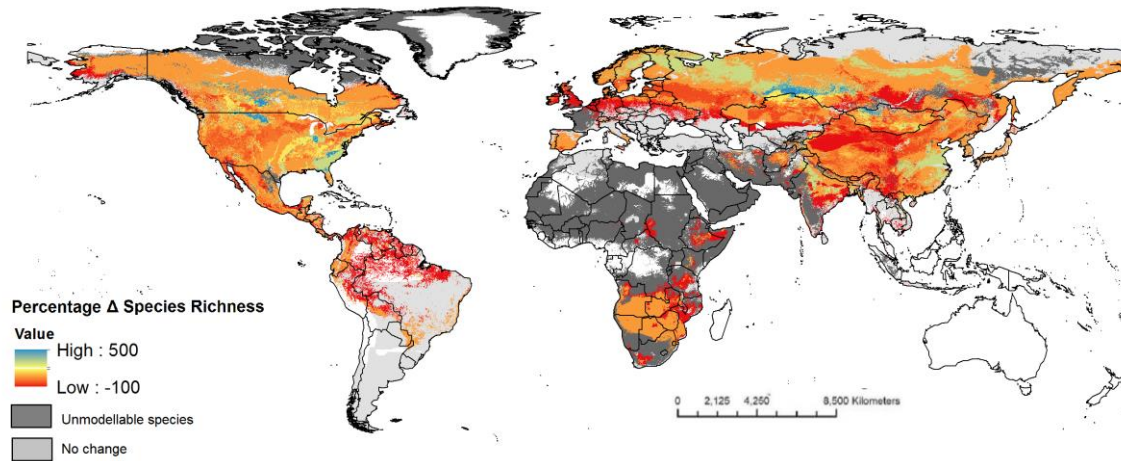

**Fig. D. Percentage change in predicted lagomorph species richness from the 1930s to 2080s.** Light grey areas indicate no change in species richness and dark grey indicates areas occupied by “unmodellable” species with uncertain outcomes.

**Table B. Results of generalised least square models characterising predicted lagomorph bioclimatic envelope changes.** Significant *p* values are in bold. Group refers to lagomorph taxonomy, i.e. pikas, rabbits and hares & jackrabbits.

| Response variable                                                                    | Term        | <i>F</i> | <i>df</i> | <i>p</i>         |
|--------------------------------------------------------------------------------------|-------------|----------|-----------|------------------|
| Range change (km)<br><i>F</i> <sub>df=1,234</sub> =0.586, <i>p</i> =0.445            | Group       | 0.004    | 2, 229    | 0.950            |
|                                                                                      | Year        | 3.710    | 1, 228    | <b>0.026</b>     |
|                                                                                      | Group: Year | 0.537    | 2, 226    | 0.585            |
| Mean latitudinal change (°)<br><i>F</i> <sub>df=1,234</sub> =13.460, <i>p</i> <0.001 | Group       | 12.798   | 2, 229    | <b>&lt;0.001</b> |
|                                                                                      | Year        | 1.603    | 1, 228    | 0.204            |
|                                                                                      | Group: Year | 0.448    | 2, 226    | 0.640            |
| Mean elevation change (m)<br><i>F</i> <sub>df=1,234</sub> =44.184, <i>p</i> <0.001   | Group       | 19.458   | 2, 229    | <b>&lt;0.001</b> |
|                                                                                      | Year        | 21.140   | 1, 228    | <b>&lt;0.001</b> |
|                                                                                      | Group: Year | 3.541    | 2, 226    | <b>0.031</b>     |

**Table C. Results of phylogenetically-controlled generalised least square regressions.**

Significant  $p$  values for model-averaged coefficients are in bold.  $F$  and  $p$  values for the top model are listed under each response variables; asterisks (\*) indicate traits in the top model.

Lambda ( $\lambda$ ) confidence intervals and significance from 0 and 1 are also shown.

| Response variable                                                                                                    | Trait                                   | $\beta \pm \text{s.e.}$ | $F$   | $p$          |
|----------------------------------------------------------------------------------------------------------------------|-----------------------------------------|-------------------------|-------|--------------|
| Range change (km)<br>$F_{df=4, 52}=4.28, p=0.005$<br>Lambda 95%CI=0, 0.147<br>N.S. from 0, $p<0.01$ from 1           | Adult body mass (g)*                    | 0.258 $\pm$ 0.112       | 2.308 | <b>0.021</b> |
|                                                                                                                      | Diet breadth                            | 0.137 $\pm$ 0.088       | 1.552 | 0.121        |
|                                                                                                                      | Gestation length (days)                 | -0.154 $\pm$ 0.121      | 1.269 | 0.204        |
|                                                                                                                      | Litters per year                        | 0.090 $\pm$ 0.084       | 1.073 | 0.283        |
|                                                                                                                      | Litter size                             | -0.062 $\pm$ 0.098      | 0.634 | 0.526        |
|                                                                                                                      | Home range size (km <sup>2</sup> )      | -0.069 $\pm$ 0.099      | 0.698 | 0.485        |
|                                                                                                                      | Population density (n/km <sup>2</sup> ) | -0.079 $\pm$ 0.090      | 0.878 | 0.380        |
|                                                                                                                      | Age at sexual maturity                  | -0.062 $\pm$ 0.089      | 0.694 | 0.488        |
|                                                                                                                      | Activity cycle                          | 0.020 $\pm$ 0.134       | 0.151 | 0.880        |
|                                                                                                                      | Habitat breadth                         | 0.050 $\pm$ 0.101       | 0.493 | 0.622        |
| Mean latitudinal change (°)<br>$F_{df=5, 49}=6.10, p<0.001$<br>Lambda 95%CI=0, 0.209<br>N.S. from 0, $p<0.01$ from 1 | Adult body mass (g)*                    | 0.196 $\pm$ 0.099       | 1.989 | <b>0.047</b> |
|                                                                                                                      | Diet breadth*                           | 0.181 $\pm$ 0.082       | 2.190 | <b>0.029</b> |
|                                                                                                                      | Litter size*                            | 0.128 $\pm$ 0.097       | 1.320 | 0.187        |
|                                                                                                                      | Litters per year*                       | 0.215 $\pm$ 0.079       | 2.731 | <b>0.006</b> |
|                                                                                                                      | Activity cycle                          | 0.097 $\pm$ 0.124       | 0.787 | 0.431        |
|                                                                                                                      | Age at sexual maturity                  | -0.106 $\pm$ 0.084      | 1.254 | 0.210        |
|                                                                                                                      | Home range size (km <sup>2</sup> )      | -0.088 $\pm$ 0.113      | 0.787 | 0.438        |
|                                                                                                                      | Gestation length (days)                 | 0.147 $\pm$ 0.132       | 1.112 | 0.266        |
|                                                                                                                      | Habitat breadth                         | 0.028 $\pm$ 0.093       | 0.304 | 0.761        |
|                                                                                                                      | Population density (n/km <sup>2</sup> ) | 0.027 $\pm$ 0.084       | 0.318 | 0.750        |
| Mean elevation change (m)<br>$F_{df=2, 50}=5.92, p=0.005$<br>Lambda 95%CI=0, 0.205<br>N.S. from 0, $p<0.01$ from 1   | Adult body mass (g)*                    | -0.183 $\pm$ 0.091      | 2.019 | <b>0.043</b> |
|                                                                                                                      | Gestation length (days)                 | 0.099 $\pm$ 0.106       | 0.932 | 0.351        |
|                                                                                                                      | Diet breadth                            | -0.110 $\pm$ 0.079      | 1.386 | 0.166        |
|                                                                                                                      | Home range size (km <sup>2</sup> )      | 0.074 $\pm$ 0.075       | 0.986 | 0.324        |
|                                                                                                                      | Litters per year                        | -0.057 $\pm$ 0.070      | 0.813 | 0.416        |
|                                                                                                                      | Age at sexual maturity                  | 0.055 $\pm$ 0.075       | 0.731 | 0.324        |
|                                                                                                                      | Activity cycle                          | 0.075 $\pm$ 0.105       | 0.708 | 0.479        |
|                                                                                                                      | Population density (n/km <sup>2</sup> ) | 0.064 $\pm$ 0.071       | 0.902 | 0.367        |
|                                                                                                                      | Litter size                             | 0.019 $\pm$ 0.079       | 0.235 | 0.814        |
|                                                                                                                      | Habitat breadth                         | -0.005 $\pm$ 0.085      | 0.058 | 0.953        |
| Max. elevation change (m)<br>$F_{df=2, 53}=3.54, p=0.036$<br>Lambda 95%CI=0, 0.384<br>N.S. from 0, $p<0.01$ from 1   | Litters per year *                      | 0.160 $\pm$ 0.092       | 1.746 | 0.081        |
|                                                                                                                      | Gestation length (days)                 | -0.136 $\pm$ 0.116      | 1.169 | 0.242        |
|                                                                                                                      | Habitat breadth                         | 0.095 $\pm$ 0.102       | 0.934 | 0.351        |
|                                                                                                                      | Age at sexual maturity                  | -0.098 $\pm$ 0.096      | 1.020 | 0.308        |
|                                                                                                                      | Activity cycle                          | 0.041 $\pm$ 0.118       | 0.348 | 0.728        |
|                                                                                                                      | Litter size                             | 0.014 $\pm$ 0.104       | 0.137 | 0.891        |
|                                                                                                                      | Population density (n/km <sup>2</sup> ) | 0.054 $\pm$ 0.091       | 0.596 | 0.551        |
|                                                                                                                      | Adult body mass (g)                     | 0.034 $\pm$ 0.121       | 0.280 | 0.780        |
|                                                                                                                      | Home range size (km <sup>2</sup> )      | -0.003 $\pm$ 0.107      | 0.029 | 0.977        |
|                                                                                                                      | Diet breadth                            | 0.004 $\pm$ 0.093       | 0.047 | 0.962        |
